# Supplementary material for: Establishing the selective phospholipid membrane coordination, permeation and lysis properties for a series of ‘druggable’ supramolecular self-associating antimicrobial amphiphiles
Source: Royal Society of Chemistry journal article supplement (doi:10.1039/d2sc02630a), 2022-01-01
Supplement: d2sc02630a1.pdf [file d2sc02630a1.pdf]

## Establishing the selective phospholipid membrane coordination, permeation and lysis properties for a series of ‘druggable’ supramolecular self-associating antimicrobial amphiphiles†

Jessica E. Boles, Charlotte Bennett,<sup>‡</sup> Jennifer Baker,<sup>‡</sup> Kira L. F. Hilton, Hiral Kotak, Ewan Clark, Yifan Long, Lisa J. White, Hin Yuk Lai, Charlotte K. Hind, J. Mark Sutton, Michelle D. Garrett, Anne Cheasty, Jose L. Ortega-Roldan, Mark Charles,\* Cally J. E. Haynes\* and Jennifer R. Hiscock\*

<sup>‡</sup> Denotes joint authorship

### Contents

|                                                                                                |    |
|------------------------------------------------------------------------------------------------|----|
| <b>Section 1: Chemical Structures</b> .....                                                    | 3  |
| <b>Section 2: General Methods</b> .....                                                        | 4  |
| <b>Section 3: Microbial Methods</b> .....                                                      | 5  |
| <b>Section 4: DMPK Methods and Further Discussion</b> .....                                    | 7  |
| <b>Summary of DMPK in vitro results and discussion:</b> .....                                  | 8  |
| <b>Section 5: Chemical Synthesis and Characterisation</b> .....                                | 11 |
| <b>Section 6: Antimicrobial Screening Data</b> .....                                           | 24 |
| <b>USA 300 Methicillin-resistant <i>Staphylococcus aureus</i> (MRSA)</b> .....                 | 24 |
| <i>Escherichia coli</i> ( <i>E. coli</i> ) DH10B .....                                         | 24 |
| <b>Section 7: Full Growth Curve Data</b> .....                                                 | 26 |
| <b>USA 300 Methicillin-resistant <i>Staphylococcus aureus</i> (MRSA)</b> .....                 | 26 |
| <i>Escherichia coli</i> ( <i>E. coli</i> ) .....                                               | 28 |
| <b>Section 8: MIC<sub>50</sub> Determination</b> .....                                         | 30 |
| <b>USA 300 Methicillin-resistant <i>Staphylococcus aureus</i> (MRSA)</b> .....                 | 30 |
| <i>Escherichia coli</i> ( <i>E. coli</i> ) .....                                               | 33 |
| <b>Section 9: Surface Tension and Critical Micelle Concentration (CMC) Determination</b> ..... | 36 |
| <b>Section 10: Vesicle Leakage Assay Data</b> .....                                            | 39 |
| <b>Initial comparative datasets</b> .....                                                      | 39 |
| <b>PC lipid titrations</b> .....                                                               | 42 |
| <b>PG lipid titrations</b> .....                                                               | 45 |
| <b>PE:PG 3:1 lipid titrations</b> .....                                                        | 48 |
| <b><i>E. coli</i> total lipid titrations</b> .....                                             | 50 |
| <b><i>E. coli</i> polar lipid titrations</b> .....                                             | 52 |
| <b>Section 11: Membrane Fluidity Assay Data</b> .....                                          | 57 |
| <b>Section 12: Fluorescence Polarisation Adhesion Assay Data</b> .....                         | 60 |
| <b>Section 13: Nanodisc Coordination Data</b> .....                                            | 64 |
| <b>Nanodisc characterisation</b> .....                                                         | 64 |

|                                                                                        |            |
|----------------------------------------------------------------------------------------|------------|
| Nanodisc titrations.....                                                               | 67         |
| <b>Section 14: Determination of Nanodisc Coordination EC<sub>50</sub> Values .....</b> | <b>79</b>  |
| Mechaelis Menten fits .....                                                            | 80         |
| Hill Plot fits.....                                                                    | 104        |
| <b>Section 15: Computational data .....</b>                                            | <b>129</b> |
| Binding energy calculations using ab initio and DFT modelling .....                    | 129        |
| Discussion relating to the choice of supporting molecular modelling studies.....       | 129        |
| Solvent model comparison .....                                                         | 135        |
| Cartesian coordinates calculated at HF/3-21G level. ....                               | 136        |
| Cartesian coordinates calculated at M06-2X/6-31G level .....                           | 165        |
| 3D visualisations – HF/3-21G level.....                                                | 180        |
| 3D visualisations – M06-2X/6-31G level .....                                           | 193        |
| <b>Section 16: References.....</b>                                                     | <b>201</b> |

## Section 1: Chemical Structures

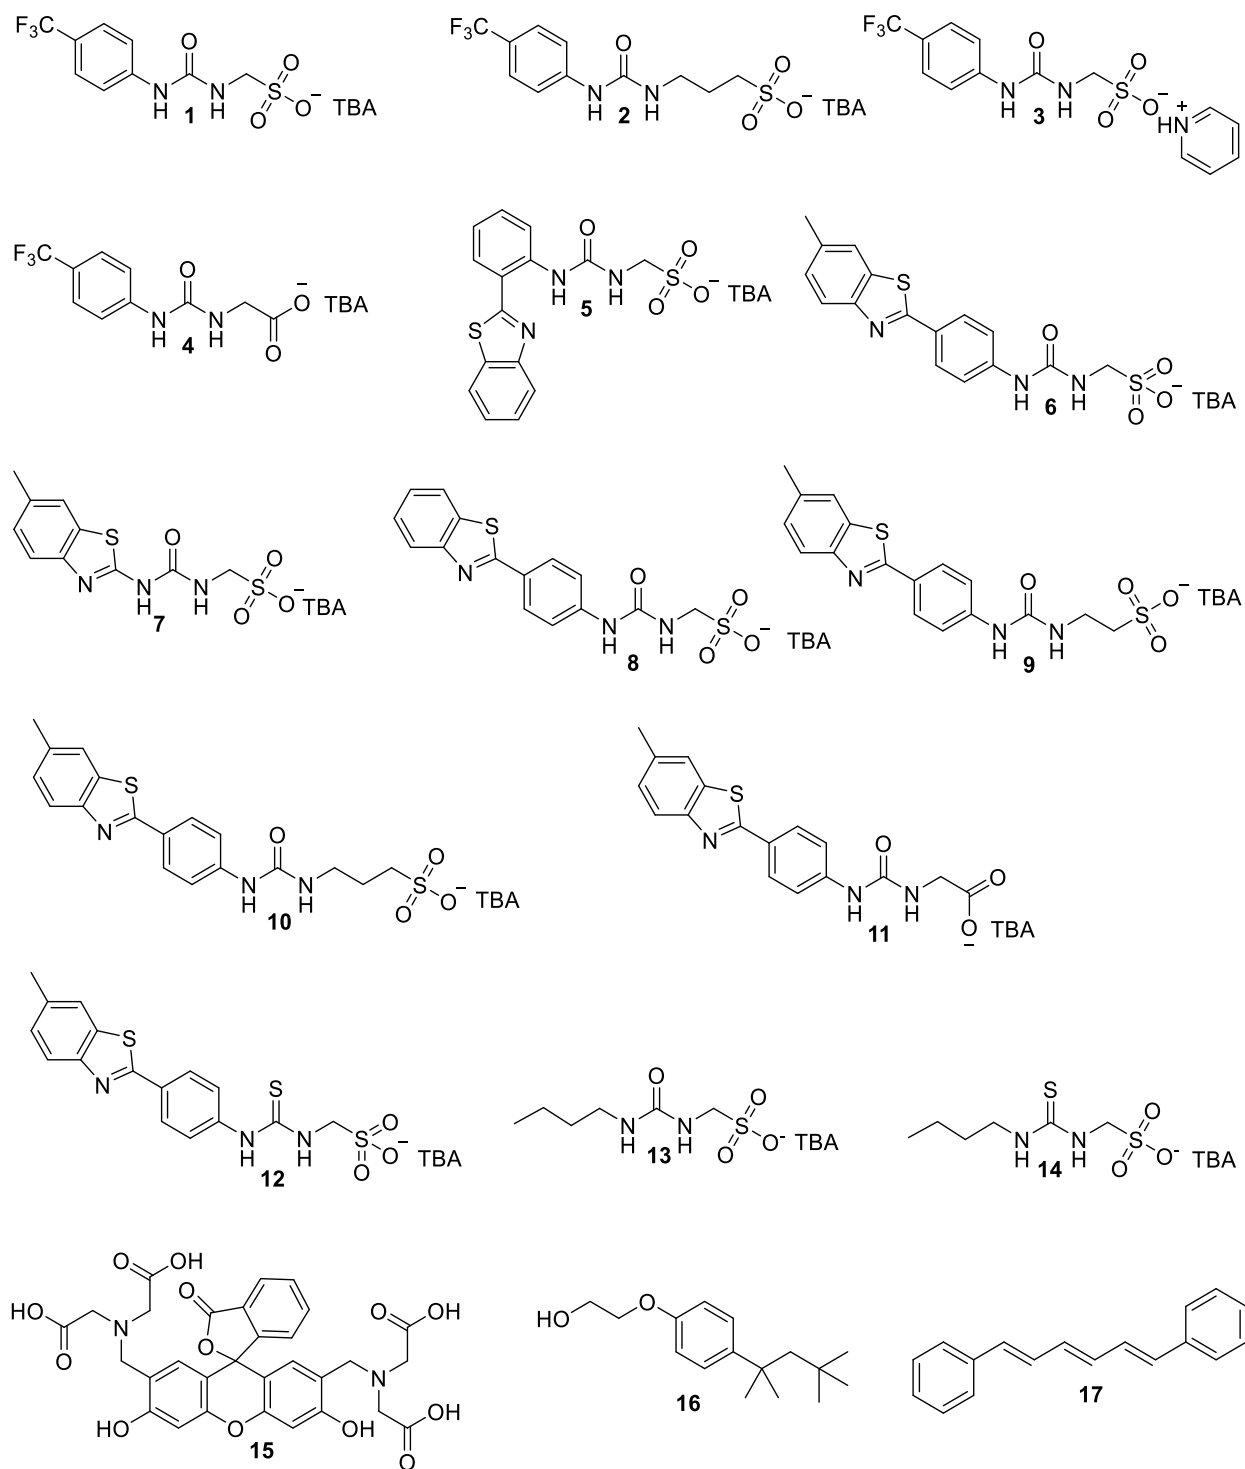

Figure S1 – Chemical structures of SSAs **1-14**, calcein, **15**, Triton X-100, **16** and 1,6-diphenyl-hexa-1,3,5-triene (DPH), **17**.

## Section 2: General Methods

**General remarks:** A positive pressure of nitrogen and oven dried glassware were used for all reactions. All solvents and starting materials were purchased from known chemical suppliers or available stores and used without any further purification unless specifically stipulated. The NMR spectra were obtained using a Burker AV2 400 MHz, AVNEO 400 MHz or Avance III 600 Hz spectrometer. The data was processed using ACD Labs or MestreNova software. NMR Chemical shift values are reported in parts per million (ppm) and calibrated to the centre of the residual solvent peak set (s = singlet, br = broad, d = doublet, t = triplet, q = quartet, m = multiplet). Fluorescence and fluorescence polarisation measurements were conducted using a Clariostar plate reader and analysed using MARS data analysis software.

**Tensiometry Studies:** All the samples were prepared in an EtOH:H<sub>2</sub>O (1:19) solution. All samples underwent an annealing process in which the various solutions were heated to approximately 40 °C before being allowed to cool to room temperature, allowing each sample to reach a thermodynamic minimum. All samples were prepared through serial dilution of the most concentrated sample. Three surface tension measurements were obtained for each sample at a given concentration, using the pendant drop method. The average values were then used to calculate the critical micelle concentration (CMC).

**Preparation of vesicles:** All lipids were purchased as powder stocks from Avanti Polar Lipids. Lipid vesicles were prepared according to standard procedures.<sup>1</sup> Each phospholipid was dissolved in chloroform (~ 10 mL) and the solvent was removed under reduced pressure. The thin film of dried lipid was further dried in vacuo for at least 2 hours. Lipid films were resuspended in the desired buffer and subjected to 9 freeze-thaw cycles in liquid nitrogen and extruded 20 times through a 200 nm polycarbonate membrane.

**Preparation of calcein loaded vesicles:** Lipid films were resuspended in buffer A (70 mM calcein, 10 mM TRIS pH 8.5, 0.5 mM EDTA, 110 mM NaCl, pH adjusted to 6-7) and subjected to 9 freeze-thaw cycles in liquid nitrogen and extruded 20 times through a 200 nm polycarbonate membrane. The suspension was run down a size exclusion column packed with sephadex G-50 using buffer B (10 mM TRIS pH 8.5, 0.5 mM EDTA, 110 mM NaCl). The hydrodynamic diameter of the lipids was monitored using an Anton Paar Litesizer™ 500 to ensure the separation of free and entrapped calcein. Phospholipid concentration was adjusted to 30 μM for vesicle leakage experiments.

**Vesicle leakage assay:** Black bottom 96-well plates were prepared with the appropriate lipid solution (100 μL, 30 μM) and desired SSA solution (100 μL) prepared in H<sub>2</sub>O/EtOH 95: 5. A solution of 1 % Triton X-100 (**16**) was used for a 100 % lysis control and a H<sub>2</sub>O/EtOH 95: 5 solution was used as a 0 % lysis control. Fluorescent measurements were taken at 25 °C using an excitation value of 495 nm and an optimised gain of 983. Data were acquired in endpoint mode. All experiments were repeated in triplicate to ensure experimental reproducibility.

**Preparation of DPH fluorescent labelled vesicles:** Lipid films were resuspended in buffer (150 mM KCl, 10 mM HEPES, pH 7.4, 2 mM EGTA) and subjected to 9 freeze-thaw cycles in liquid nitrogen and extruded 20 times through a 200 nm polycarbonate membrane. For fluorescent labelling, the desired vesicles were pre-incubated with 1,6-diphenyl-hexa-1,3,5-triene (DPH) (10 μM) at 60 °C for 1 hour.

**Membrane fluidity validity assay:** DPH labelled DSPG (1,2-Distearoyl-sn-glycero-3-phosphoglycerol) vesicles were prepared with a defined gel-to-liquid crystalline phase transition temperature of 55 °C. Fluorescence polarisation (FP) measurements were taken using a 355 nm filter for excitation and a 430 m for emission. The DPH labelled vesicles were set to a FP value of 100 mP. Steady state measurements were taken at 25 °C – 60 °C, the temperature on the microplate was increased in 10 °C increments until 45 °C, temperatures above this were reached externally using a heating plate. Data

were acquired in endpoint mode. All experiments were repeated in triplicate to ensure experimental reproducibility.

**Membrane fluidity assay:** Black bottom 96-well plates were prepared by serially diluting desired SSA in a H<sub>2</sub>O/EtOH 95: 5 solution across the plate, the appropriate DPH labelled vesicles (100  $\mu$ L, 30  $\mu$ M) were added to each well to give a total well volume of 200  $\mu$ L. FP measurements were taken at 25 °C using a 355 nm filter for excitation and a 430 m for emission. The DPH labelled vesicles were set to a FP value of 100 mP. Data were acquired in endpoint mode. All experiments were repeated in triplicate to ensure experimental reproducibility.

**Fluorescence polarisation:** Lipid films were resuspended in Buffer (150 mM KCl, 10 mM HEPES, pH 7.4, 2 mM EGTA) and subjected to 9 freeze-thaw cycles in liquid nitrogen and extruded 20 times through a 200 nm polycarbonate membrane. Black bottom 96-well plates were prepared by serially diluting desired vesicle solution across the plate, the appropriate SSA solution (100  $\mu$ L, 0.15 mM) was added to each well to give a total well volume of 200  $\mu$ L. Fluorescent SSA solutions were set to a FP value of 100 mP. Data were acquired in endpoint mode. All experiments were repeated in triplicate to ensure experimental reproducibility.

**Nanodisc preparation:** Lipid films were resuspended in Buffer (20 mM NaCl, 20 mM NaH<sub>2</sub>PO<sub>4</sub>, pH 7.4) and sonicated for 1 hour, at a 5:1 ratio, SMA was added and incubated at 37 °C for 1 hour. Dialysed overnight in 5 L of the same buffer in 10 KDa cut-off dialysis tubing, concentrated, and underwent gel filtration size exclusion chromatography on a Superdex 200 10/300 GL column (GE Healthcare) in the same buffer, whilst monitoring absorbance at 260 nm. Nanodisc quantification carried out via monitoring of absorbance at 260 nm using a calibration curve.<sup>2</sup>

**<sup>1</sup>H NMR CPMG:** <sup>1</sup>H NMR CPMG<sup>3,4</sup> spectra were obtained with a Bruker Avance III 600 Hz spectrometer equipped with a TCIP cryoprobe at 298 K. Samples were supplemented with 5 % D<sub>2</sub>O and 0.02 mM 4,4-dimethyl-4-silapentane-1-sulfonic acid (DSS). The standard zgprcpmg pulse sequence from the Bruker library was modified with a watergate element to allow suppression of the water signal and was used for all experiments. Although this sequence is readily obtainable, we are happy to provide it on request. The P1 pulses were 9  $\mu$ s at a power of 7.9 W. Presaturation was applied between acquisitions for 100 ms at a power level of 280 mW and acquisition was carried out of 852  $\mu$ s. Water suppression was achieved with a 3-9-19 watergate sequence using 1 ms pulses with a smothered chirp shape with a peak strength of 21.2 G. The CPMG element had a length of 300 ms with delays between 180 ° pulses of 1 ms. Repetition times were chosen to achieve suitable water suppression with the presat and watergate sequences used in 95 % H<sub>2</sub>O solution. The length of the CPMG element was chosen to achieve good differentiation between unbound and strongly bound ligands. Data was collected with 16,384 points and a spectral width of 16.0242 ppm, receiver gain was set to 128, with 512 scans, 8 dummy scans and an acquisition time of 0.85 s. Data was processed using MestreNova software. All spectra were automatically phased, baselined corrected using a polynomial function and calibrated to the centre of the DSS peak.

**Fitting of <sup>1</sup>H NMR CPMG data:** The data was fit to Michaelis Menten and Hill plot models and compared through R<sup>2</sup> analysis using Origin 2022 software,<sup>5</sup> growth/sigmoidal category, Hill/MichaelisMenten function, Levenberg Marquardt iteration algorithm. V<sub>max</sub> fixed to 100 % as this was the greatest proportion of SSA that could be coordinated to the nanodiscs. See Tables S4 and 5.

## Section 3: Microbial Methods

**These methods were taken directly from UK Health and Security Office (UKHSA) standard operating procedures.**

**Preparation of Luria Broth media (LB):** Yeast extract (5 g), tryptone (10 g) and sodium chloride (10 g) were dissolved in dH<sub>2</sub>O (1 L) then divided into bottles and autoclaved.

**Preparation of Luria Broth (LB) agar plates:** Agar (6 g) was added to LB (400 mL) and autoclaved. Once cool, the LB agar was poured into sterile petri dishes under sterile conditions and allowed to set. LB plates were stored at 4 °C until use.

**Preparation of bacterial plates:** Sterile LB agar plates were streaked using *Escherichia coli* DH10B or USA300 Methicillin-Resistant *Staphylococcus aureus* then incubated at 37 °C overnight.

**Preparation of Inoculum:** An initial culture was made up by inoculating LB media (5 mL) with a single colony of bacteria under sterile conditions and incubated at 37 °C with shaking overnight. The following day, overnight bacterial cultures were subcultured into fresh LB medium to a starting OD<sub>600</sub> of 0.01.

**Preparation of 96 well microplate for screening:** 20 mM solutions of each compound to be tested were made up using 5 % ethanol. The 1:100 cell suspension (150 µL) was pipetted into the wells and SSA compound solutions (30 µL) were added into each well. The final screening concentration for each compound was 3.3 mM in the well. These were incubated for 20 hours in a plate reader, with optical density readings being taken at 600 nm every 15 minutes. Optical density readings were plotted against time to produce growth curves.

**Preparation of 96 well microplate for MIC<sub>50</sub>:** The 1:100 cell suspension (150 µL) was dispensed into individual wells under sterile conditions. Compounds (30 µL) were added to the wells to equal a total volume of 180 µL in the wells. Six repeats of each concentration for each compound were created each plate. The plates were sealed using parafilm, then incubated at 37°C in a microplate reader for 18-25 hours. Optical density readings were taken at 600 nm every 15 min. Data was used to generate growth curves.

**Calculation of MIC<sub>50</sub>:** Growth curves were plotted using OD<sub>600</sub> optical density readings in Microsoft<sup>®</sup> Excel<sup>®</sup> 2013. OD<sub>600</sub> optical density readings 900 minutes from the start of each of these growth cultures for each concentration of compound were plotted in Origin<sup>®</sup> 2015. The resultant curve was normalized and fitted using the Boltzmann fit to define the MIC<sub>50</sub> values for each compound.

## Section 4: DMPK Methods and Further Discussion

**Materials used for DMPK studies:** Sprague Dawley rat liver microsomes (male, 771 donors, Lot 1910100), CD-1 mouse liver microsomes (male, 6424 donors, Lot 2010017) and human liver microsomes (mixed gender, 50 donors, Lot 1810003) were purchased from Sekisui Xenotech (Kansas City, USA).

**Microsomal incubations:** SSA **1-6** and **10** (final concentration 1  $\mu$ M) were pre-incubated for 10 min in mouse, rat, or human liver microsomes (final concentration 0.5 mg/mL prepared in 100 mM potassium phosphate buffered saline (PBS)) at 37°C. The reaction was initiated with the addition of the cofactor, NADPH-generating system. The NADPH-generating system consisted of NADP (1.3 mM, pH 7.4), glucose-6-phosphate (3.3 mM, pH 7.4), glucose-6-phosphate dehydrogenase (0.4 unit/mL) and MgCl<sub>2</sub> (3.3 mM). The reaction was allowed to proceed for 45 min. At 0, 5, 10, 15, 30, and 45 min aliquots were sampled and quenched in ice cold acetonitrile with internal standard. Incubations were conducted in singlicate; control incubations (substituting PBS for NADPH) were conducted simultaneously. All control incubations were within acceptance criteria in mouse, rat, and human microsomes confirming stability was acceptable over 45 minutes in the absence of co-factor.

**Protein Binding studies:** The fraction unbound in mouse plasma (BioIVT, Frankfurt Am Main, Germany) of SSA **1-6** and **10** were measured using a Rapid Equilibrium Dialysis device (Thermo Fisher Scientific, Loughborough, UK). Mouse plasma containing 2  $\mu$ M of SSA **1-6** and **10** were dialysed against 100 mM PBS for 4h at 37°C at 5% CO<sub>2</sub>. Samples were removed, matrix matched and quenched with acetonitrile containing internal standard; further processing is described in: **Sample preparation and liquid chromatography-mass spectrometry analysis.**

**Caco-2 Permeability studies:** The permeability assay for SSA **1-6** and **10** was performed at Cyprotex Discovery Limited (Macclesfield, UK) and analysed at Cancer Research Horizons. SSA **1-6** and **10** were incubated at a final concentration of 10  $\mu$ M with human intestinal Caco-2 cells at 37°C, 5% CO<sub>2</sub> with a relative humidity of 95%. After 120 minutes the apical compartment inserts and the companion plates were separated, and the apical and basolateral samples were transferred. Incubations were conducted in duplicate and the fluorescent membrane integrity marker; Lucifer Yellow was co-incubated with the SSA compounds at the start of the assay. Compounds of known permeability were used as controls and were within acceptance criteria. Further processing is described in: **Sample preparation and liquid chromatography-mass spectrometry analysis.**

**Sample preparation and liquid chromatography-mass spectrometry analysis:** All samples were centrifuged at 3500 rpm at 4°C for 10 min to precipitate protein and enable sampling of supernatant prior to appropriate dilution for liquid chromatography-mass spectrometry (LC-MS/MS analysis).

For the purpose of CL<sub>INT</sub> determination, samples were analysed using a Waters I-Class ultra-high-performance liquid chromatography (UHPLC) system coupled to a Waters Xevo TQ-XS mass spectrometer (Waters, Elstree, UK). Separation of analytes was achieved using an Accucore Vanquish C18+ column (1.5  $\mu$ m, 50 x 2.1 mm) (Thermo Fisher Scientific, Hemel Hempstead) at a temperature of 40°C and a binary mobile phase gradient at a flow rate of 0.4 mL/min. Initial LC conditions comprised 95% solvent A (0.1% formic acid + 5 mM ammonium acetate in water), 5% solvent B (0.1% formic acid + 5 mM ammonium acetate in acetonitrile); this was ramped to 90% B at 5 min, and then immediately returned to initial conditions and held for the remaining 0.5 min of the method. Sample analysis was by electrospray ionisation combined with multiple reaction monitoring in negative ion mode. The capillary voltage was 0.8 kV, desolvation gas was 600°C.

For the purpose of fu and SSA-3 PK determination, samples were analysed using a Waters I-Class ultra-high-performance liquid chromatography (UHPLC) system coupled to a Waters Xevo TQ-XS mass spectrometer. Separation of analytes was achieved using an Accucore Vanquish C18+ column (1.5 µm, 50 x 2.1 mm) at a temperature of 40°C and a binary mobile phase gradient at a flow rate of 0.4 mL/min. Initial LC conditions comprised 66% solvent A (0.1% formic acid + 5 mM ammonium acetate in water), 33% solvent B (0.1% formic acid + 5 mM ammonium acetate in methanol); this was ramped to 63% B at 1.8 min and 95% B at 1.9 min, held for 0.5 min and then immediately returned to initial conditions and held for the remaining 0.5 min of the method. Sample analysis was by electrospray ionisation combined with multiple reaction monitoring in negative ion mode. The capillary voltage was 0.8 kV, desolvation gas was 600°C.

For the purpose of apparent permeability determination, samples were analysed using a Waters I-Class ultra-high-performance liquid chromatography (UHPLC) system coupled to a Waters Vion mass spectrometer (Waters, Elstree, UK). Separation of analytes was achieved using an Accucore Vanquish C18+ column (1.5 µm, 50 x 2.1 mm) at a temperature of 40°C and a binary mobile phase gradient at a flow rate of 0.4 mL/min. Initial LC conditions for SSA 1-4 comprised 66% solvent A (0.1% formic acid + 5 mM ammonium acetate in water), 33% solvent B (0.1% formic acid + 5 mM ammonium acetate in methanol); this was ramped to 63% B at 1.8 min and 95% B at 1.9 min, held for 0.5 min and then immediately returned to initial conditions and held for the remaining 0.5 min of the method. Initial LC conditions for SSA 5-10 comprised 54% solvent A (0.1% formic acid + 5 mM ammonium acetate in water), 46% solvent B (0.1% formic acid + 5 mM ammonium acetate in methanol); this was ramped to 67% B at 1.8 min and 95% B at 1.9 min, held for 0.5 min and then immediately returned to initial conditions and held for the remaining 0.5 min of the method. Sample analysis was by electrospray ionisation in negative ion mode. The capillary voltage was 2.5 kV, desolvation gas was 600°C.

For the purpose of PK determination of SSA 5, samples were analysed using a Waters I-Class ultra-high-performance liquid chromatography (UHPLC) system coupled to a Waters Xevo TQ-XS mass spectrometer. Separation of analytes was achieved using an Accucore Vanquish C18+ column (1.5 µm, 50 x 2.1 mm) at a temperature of 40°C and a binary mobile phase gradient at a flow rate of 0.4 mL/min. Initial LC conditions comprised 54% solvent A (0.1% formic acid + 5 mM ammonium acetate in water), 46% solvent B (0.1% formic acid + 5 mM ammonium acetate in methanol); this was ramped to 67% B at 1.8 min and 95% B at 1.9 min, held for 0.5 min and then immediately returned to initial conditions and held for the remaining 0.5 min of the method. Sample analysis was by electrospray ionisation combined with multiple reaction monitoring in negative ion mode. The capillary voltage was 0.8 kV, desolvation gas was 600°C.

**Mean blood concentration-time profile:** Within these studies SSAs 3 and 5 were dosed at 1 mg/kg, to female CD-1 mice (n=9 per SSA) via an intravenous tail vein bolus dose formulation as solutions in 2 % DMSO/98 % water. Blood taken from the mouse tail vein was extracted by protein precipitation. SSA concentrations were calculated through UPLC-MS/MS techniques, with tolbutamide as the internal standard. The assay met the acceptance criteria with >7 calibration standards within ± 20% of nominal concentration. The lower limit of quantitation was 2 ng/mL for both compounds. PK parameters were calculated using Phoenix WinNonLin 8.1.0.3530. The results of these studies are shown in Figure 12 and Table 4 – main manuscript.

### Summary of DMPK in vitro results and discussion:

We first determined the in vitro metabolic stability of these SSAs against mouse, rat, and human liver microsomes. These microsomes contain membrane bound enzymes, such as cytochrome p450,



which are responsible for first pass metabolism effects, to which a potential therapeutic agent must exhibit some resilience. Within this assay the stability of the intact parent compound is monitored with respect to time, during incubation at 37 °C in the presence of the co-factor NADPH – required for cytochrome p450 activity. From these data, the intrinsic clearance ( $Cl_{int}$ ) of the compound can be calculated. The lower this value, the more stable the compound is to the actions of these membrane bound metabolic enzymes. This high throughput assay represents a relatively low-cost route to enable the ranking of many compounds with respect to metabolic stability. The results of this assay showed that all of those SSAs tested demonstrated a  $Cl_{int} < 0.647$  mL/min/g liver across this panel of microsomes, considered low by industrial standards.

Mouse plasma protein binding (PPB) assays were performed to estimate the ability of an SSA to distribute into the tissues of the body, as the extent to which a compound binds to the constituents of blood plasma will influence drug distribution. For example, protein binding will prevent a compound diffusing from the circulatory system into tissues to reach a cellular site of targeted action. In addition, these interactions also affect compound metabolism and elimination rates. The results of the PPB assays are summarised in Table S1. Here the fraction of SSA which remains unbound to protein under these assay conditions, a value known as the  $f_u$ , is calculated, and used to derive the percentage of SSA which undergoes protein plasma binding (PPB), Equation S1.

$$PPB (\%) = (1-f_u) \times 100$$

Equation S1 - Calculation of percentage of SSA that remains undergoes PPB,  $f_u$ .

The percentage of SSA recovered during the analysis process should be 100%; any deviation from this value indicates experimental limitations such as unintended potential non-specific binding events to experimental equipment, solubility issues, etc.. As part of the PPB assay, plasma stability was assessed. This reports the % of an SSA, supplied under these experimental conditions, to remain intact over a 4-hour time period. This is also important as those compounds which are found to degrade rapidly within plasma are generally known to exhibit poor in vivo efficacy. In addition, this instability can lead to false in vivo data interpretation.

Table S1 - Summary of data collected from n = 4 technical repeat mouse plasma protein binding assays. PPB = % of SSA bound to the plasma proteins after 4 hours incubation at 37 °C. Low PPB = < 80 %; Moderate PPB = 80-95 %; High PPB = 95-99 %; Very high PPB = > 99 %. Recovery = % SSA recovered from the assay after 4 hours.

| SSA       | PPB    | Recovery | Plasma stability |
|-----------|--------|----------|------------------|
| <b>1</b>  | 75.0   | 91       | 94               |
| <b>2</b>  | 83.4   | 79       | 93               |
| <b>3</b>  | 73.8   | 80       | 89               |
| <b>4</b>  | 67.2   | 86       | 96               |
| <b>5</b>  | > 99.7 | 109      | 92               |
| <b>6</b>  | 99.3   | 101      | 90               |
| <b>10</b> | 99.3   | 94       | 89               |

All SSAs tested exhibited high plasma stability and acceptable % recoverability values to validate the % PPB values obtained. SSAs **1**, **3** and **4** were all found to exhibit low PPB values. All of these SSAs contain a trifluoromethyl functionality, a TBA counter cation and a methylene urea-anion linker. In

addition, replacement of the trifluoromethyl group by the benzothiazole substituent (SSAs **5**, **6** and **10**) significantly raises the PPB from low/moderate to very high which, we believe, is due to the presence of the extended aromatic ring systems supporting more favourable SSA:protein  $\pi$ - $\pi$  stacking/hydrophobic interactions within the mouse plasma.

To gauge the suitability of SSAs for oral dosing, the seven SSAs were further analysed using a Caco-2 permeability assay, the results of which are summarised in Table S2. This in vitro assay is used to both predict human intestinal permeability and investigate drug efflux, predicting in vivo compound absorption. Caco-2 cells have characteristics that cause them to resemble intestinal epithelial cells as they form a polarised monolayer with a well-defined brush border on the outward facing (apical) cell surface and at the intercellular junctions. This assay allows assessment of a compound's ability to undergo transport from the apical to the basolateral (A-B) surface of the cell monolayer and *vice versa*.

None of the SSAs were found to permeate the monolayer in the A-B direction due to efflux, however low to high SSA permeation was observed in the B-A direction, which was broadly found to correlate with calculated clogD values obtained using StarDrop software (Version: 7.1.2.31725). High permeability coefficient ( $P_{app}$ ) values were obtained for SSAs **5** and **6**, which both contain a benzothiazole functionality. However, moving this functionality from the meta to the para position on the SSA anion benzene ring system was found to decrease the  $P_{app}$  by 48 %, possibly due to the loss of intramolecular urea:benzothiazole hydrogen bonding<sup>38</sup> and exposure of the polar urea functionality of the monomeric unit to the wider biological environment. Increasing the length of the urea-sulfonate alkyl spacer from a methylene group (SSA **6**) to a propylene group (SSA **10**) was found to further decrease SSA permeability. This trend was also observed for the trifluoromethyl substituted SSAs **1** and **2**. Interestingly, further comparison of the  $P_{app}(B-A)$  values obtained for SSAs **1-4** showed the permeation properties of SSAs with the same anion, but different cation to be similar (SSAs **1** and **3**), while replacing the sulfonate group for the carboxylate anion was also found to decrease SSA permeability (SSAs **1** and **4**). This is perhaps expected due to the increased charge density, and presumably decrease in lipophobicity, observed for the carboxylate over the sulfonate moiety.

As mentioned, compound recovery was also determined to enable assay validation; here the % recovery of SSAs **6** and **10** from the Caco-2 assay was low ( $P_{app}(A-B)$ ), potentially due to non-specific SSA binding to the apical layer. However, as the  $P_{app}$  calculated for these assays was found to be  $0.0 \times 10^{-6}$  cm/s, this low percentage recovery is not problematic. In addition, for all SSAs tested, efflux ratios were not quantified due to the low  $P_{app}(A-B)$ . However, a high rate of active efflux can be considered due to the way in which the efflux ratio is calculated (efflux ratio =  $P_{app}(B-A)/P_{app}(A-B)$ ). As the results of these studies show these SSAs to exhibit a high proportion of compound efflux, meaning that at present these compounds are likely to suffer issues moving from the intestinal lumen to circulation (apical to basolateral layer), this suggests that these compounds would favour intra venous (i.v.) administration.

Table S2 - Summary of results from Caco-2 permeability assays (n = 2 technical repeats) for SSAs **1-6** and **10**. Here the  $P_{app}$  is given as  $\times 10^{-6}$  cm/s. Low  $P_{app} = < 5 \times 10^{-6}$  cm/s; Moderate  $P_{app} = 5-10 \times 10^{-6}$  cm/s; High  $P_{app} = > 10 \times 10^{-6}$  cm/s. A = apical; B = basolateral; N/A = not applicable. Recovery = % SSA recovered from the assay after 2 hours. clogD values were calculated using StarDrop at pH 7.4, here a value between 1 and 3 is considered good for permeability and hence oral bioavailability.

| SSA       | $P_{app}$<br>(A-B) | Recovery | $P_{app}$<br>(B-A) | Recovery | Efflux<br>ratio | clogD    |
|-----------|--------------------|----------|--------------------|----------|-----------------|----------|
| <b>1</b>  | 0.0                | 93       | 5.4                | 101      | N/A             | <i>a</i> |
| <b>2</b>  | 0.0                | 97       | 1.7                | 102      | N/A             | 0.1652   |
| <b>3</b>  | 0.0                | 99       | 5.6                | 98       | N/A             | <i>a</i> |
| <b>4</b>  | 0.0                | 93       | 2.3                | 96       | N/A             | <i>a</i> |
| <b>5</b>  | 0.0                | 79       | 21.0               | 107      | N/A             | 0.4737   |
| <b>6</b>  | 0.0                | 59       | 11.0               | 86       | N/A             | 0.5840   |
| <b>10</b> | 0.0                | 54       | 6.7                | 95       | N/A             | 0.9826   |

*a* - negative cLogD value calculated, therefore not reported.

## Section 5: Chemical Synthesis and Characterisation

**Compound 1:** This compound was synthesised in line with our previously published methods. Proton NMR were found to match our previously published. <sup>6</sup>

**Compound 2:** This compound was synthesised in line with our previously published methods. Proton NMR were found to match our previously published. <sup>7</sup>

**Compound 3:** This compound was synthesised in line with our previously published methods. Proton NMR were found to match our previously published. <sup>8</sup>

**Compound 4:** This compound was synthesised in line with our previously published methods. Proton NMR were found to match our previously published. <sup>7</sup>

**Compound 5:** This compound was synthesised in line with our previously published methods. Proton NMR were found to match our previously published. <sup>9</sup>

**Compound 6:** This compound was synthesised in line with our previously published methods. Proton NMR were found to match our previously published. <sup>9</sup>

**Compound 7:** Aminomethansulfonic acid (0.22 g, 2.00 mmol) was dissolved in tetrabutylammonium in methanol (2.00 mL, 2 mmol) with excess methanol (15 mL) to aid dissolving before being taken to complete dryness. A mixture of 2-Aminobenzothiazole (0.33 g, 2.00 mmol) and 1,1'-Carbonyldiimidazole (0.33 g, 2.00 mmol) were heated at reflux at 80 °C for 4 hours in chloroform (20 mL). Tetrabutylammonium aminomethanesulfonate (2.00 mmol) was dissolved in chloroform (2.00 mL) and added to the original reaction mixture and heated at reflux at 80 °C overnight. The solvent was removed and the resulting oil dissolved in ethyl acetate (15 mL), producing the pure product as a white solid with a yield of 91 % (0.99 g, 1.82 mmol); Melting point: > 200 °C; <sup>1</sup>H NMR (400 MHz, 298 K, DMSO-*d*<sub>6</sub>):  $\delta$ : 0.93 (t, *J* = 7.24 Hz, 12H), 1.25 – 1.35 (m, 8H), 1.52 – 1.59 (m, 8H), 2.37 (s, 3H), 3.13 – 3.17 (m, 8H), 3.91 (d, *J* = 5.88 Hz, 2H), 7.11 – 7.17 (m, 2H), 7.50 (d, *J* = 8.16 Hz, H), 7.67 (s, 1H), 10.52 (s, 1H); <sup>13</sup>C{<sup>1</sup>H} NMR (100 MHz, 298K, DMSO-*d*<sub>6</sub>):  $\delta$ : 13.6, (CH<sub>3</sub>), 19.3 (CH<sub>2</sub>), 21.0 (CH<sub>3</sub>), 23.1 (CH<sub>2</sub>), 55.9

(CH<sub>2</sub>), 57.5 (CH<sub>2</sub>), 119.5 (ArCH), 121.1 (ArCH), 127.0 (ArCH), 131.7 (ArC), 132.0 (ArC), 147.1 (ArC), 153.3 (ArC), 158.7 (ArC); IR (film):  $\nu$  (cm<sup>-1</sup>) = 3345 (NH stretch), 1697 (C=O stretch), 1038 (CN stretch); HRMS for the sulfonate-urea ion (C<sub>10</sub>H<sub>10</sub>N<sub>3</sub>O<sub>4</sub>S<sub>2</sub><sup>-</sup>) (ESI<sup>-</sup>): m/z: act: 300.0133 [M] cal: 300.0118 [M].

**Compound 8:** Aminomethansulfonic acid (0.11 g, 2 mmol) was dissolved in tetrabutylammonium in methanol (2.00 mL, 2.00 mmol) with excess methanol to aid dissolving before being taken to complete dryness. A mixture of 4-(benzothiazol-2-yl)aniline (0.45 g, 2.00 mM) and triphosgene (0.30 g, 1 mmol) was heated at reflux for 4 hours in ethyl acetate (20 mL). Tetrabutylammonium aminomethanesulfonate (2.00 mmol) was dissolved in ethyl acetate (2.00 mL) and added to the original reaction mixture and heated at reflux overnight. The crude precipitate was the clean product with a yield of 67 % (0.81 g, 1.34 mmol); melting point: 195 °C; <sup>1</sup>H NMR (400MHz, 298K, DMSO-*d*<sub>6</sub>):  $\delta$ : 0.93 (t, *J* = 7.32, 12H), 1.26 – 1.35 (m, 8H), 1.52 – 1.60 (m, 8H), 3.13 – 3.17 (m, 8H), 3.90 (d, *J* = 5.68 Hz, 2H), 6.65 (s, 1H), 7.41 (t, *J* = 7.76 Hz, 1H), 7.51 (t, *J* = 7.84 Hz, 1H), 7.57 (d, *J* = 8.44 Hz, 2H), 7.95 – 8.00 (m, 3H), 8.09 (d, *J* = 7.92 Hz, 1H), 9.18 (s, 1H); <sup>13</sup>C{<sup>1</sup>H} NMR (100 MHz, 298 K, DMSO-*d*<sub>6</sub>):  $\delta$ : 13.6 (CH<sub>3</sub>), 19.2 (CH<sub>2</sub>), 23.1 (CH<sub>2</sub>), 56.0 (CH<sub>2</sub>), 57.5 (CH<sub>2</sub>), 117.6 (ArCH), 122.2 (ArCH), 122.4 (ArCH), 125.0 (ArCH), 125.4 (ArC), 126.5 (ArCH), 128.0 (ArCH), 134.2 (ArC), 143.7 (ArC), 153.7 (ArC), 154.2 (ArC), 167.4 (C=O); IR (film):  $\nu$  (cm<sup>-1</sup>) = 3267 (NH stretch), 1697 (C=O stretch), 1327 (S=O stretch), 1038 (CN stretch); HRMS for the sulfonate-urea ion (C<sub>15</sub>H<sub>12</sub>N<sub>3</sub>O<sub>4</sub>S<sub>2</sub><sup>-</sup>) (ESI<sup>-</sup>): m/z: act: 390.2425 [M + C<sub>2</sub>H<sub>4</sub>] cal: 362.0275 [M].

**Compound 9:** Aminomethansulfonic acid (0.11 g, 2.00 mmol) was dissolved in tetrabutylammonium in methanol (2.00 mL, 2 mmol) with excess methanol (15 mL) to aid dissolving before being taken to complete dryness. A mixture of 4-(benzothiazol-2-yl)aniline (0.48 g, 2 mmol) and triphosgene (0.30 g, 1 mmol) was heated at reflux for 4 hours in ethyl acetate (20 mL). Tetrabutylammonium aminomethanesulfonate (2 mM) was dissolved in ethyl acetate (2.00 mL) and added to the original reaction mixture and heated at reflux overnight. The crude precipitate was the clean product with a yield of 64 % (0.81 g, 1.28 mmol); melting point: 195 °C; <sup>1</sup>H NMR (400MHz, 298K, DMSO-*d*<sub>6</sub>):  $\delta$ : 0.93 (t, *J* = 7.36, 12H), 1.26 – 1.36 (m, 8H), 1.53 – 1.60 (m, 8H), 2.45 (s, 3H), 2.57 (t, *J* = 6.04 Hz, 2H), 3.14 – 3.18 (m, 8H), 3.39 (q, *J* = 6.32 Hz, 2H), 6.51 (t, *J* = 5.28 Hz, 1H), 7.32 (d, *J* = 8.04 Hz, 1H), 7.59 (d, *J* = 8.72 Hz, 2H), 7.85 – 7.92 (m, 4H), 9.30 (s, 1H); <sup>13</sup>C{<sup>1</sup>H} NMR (100 MHz, 298 K, DMSO-*d*<sub>6</sub>):  $\delta$ : 13.4 (CH<sub>3</sub>), 19.1 (CH<sub>2</sub>), 21.0 (CH<sub>3</sub>), 23.0 (CH<sub>2</sub>), 36.1 (CH<sub>2</sub>), 50.9 (CH<sub>2</sub>), 57.5 (CH<sub>2</sub>), 117.5 (ArCH), 121.6 (ArCH), 121.9 (ArCH), 125.3 (ArC), 127.7 (ArCH), 127.8 (ArCH), 134.2 (ArC), 134.6 (ArC), 143.8 (ArC), 151.8 (ArC), 154.7 (ArC), 166.2 (C=O); IR (film):  $\nu$  (cm<sup>-1</sup>) = 3267 (NH stretch), 1697 (C=O stretch), 1327 (S=O stretch), 1038 (CN stretch); HRMS for the sulfonate-urea ion (C<sub>15</sub>H<sub>12</sub>N<sub>3</sub>O<sub>4</sub>S<sub>2</sub><sup>-</sup>) (ESI<sup>-</sup>): m/z: act: 390.0575 [M] cal: 390.0588 [M].

**Compound 10:** This compound was synthesised in line with our previously published methods. Proton NMR were found to match our previously published.<sup>10</sup>

**Compound 11:** A mixture of 4-(6-methylbenzothiazole-2-yl)aniline (0.48 g, 2.00 mmol) and triphosgene (0.30 g, 1.00 mmol) were heated at reflux for 4 hours in ethyl acetate (10.00 mL), then tert-butyl 2-amino-acetate (0.26 g, 2.00 mmol) was added to the original reaction mixture and then heated at reflux overnight. The crude precipitate was removed. The precipitate was dissolved in chloroform (5.00 mL), trifluoroacetic acid (1.50 mL) added and the resulting solution left to stir at RT for 30 minutes. NaOH (6 M) was then added dropwise, testing pH until neutral and the deprotected product precipitates out. Dissolve product in methanol (10 mL) and add tetrabutylammonium hydroxide in excess (2.00 mL, 2.00 mmol). Remove precipitate and take the filtrate to dryness and titrate with water. Filter to produce pure product as a white solid with a yield of 27 % (0.23 g, 0.39 mmol), Melting point: 86 °C; <sup>1</sup>H NMR (400MHz, 298K, DMSO-*d*<sub>6</sub>):  $\delta$ : 0.92 (t, *J* = 7.28, 12H), 1.25 – 1.34 (m, 8H), 1.51 – 1.58 (m, 8H), 2.44 (s, 3H), 3.12 – 3.16 (m, 8H), 3.39 (d, *J* = 3.48 Hz, 2H), 6.92 (s, 1H),

7.31 (d,  $J = 8.52$  Hz, 1H), 7.72 – 7.90 (m, 6H), 10.49 (s, 1H);  $^{13}\text{C}\{^1\text{H}\}$  NMR (100 MHz, 298 K, DMSO- $d_6$ ):  $\delta$ : 13.5 (CH<sub>3</sub>), 19.2 (CH<sub>2</sub>), 21.0 (CH<sub>3</sub>), 23.1 (CH<sub>2</sub>), 45.0 (CH<sub>2</sub>), 57.5 (CH<sub>2</sub>), 117.1 (ArCH), 121.7 (ArCH), 121.9 (ArCH), 124.6 (ArC), 127.7 (ArCH), 127.8 (ArCH), 134.2 (ArC), 134.5 (ArC), 144.8 (ArC), 151.9 (ArC), 154.8 (ArC), 166.5 (C=O), 170.4 (C=O); IR (film):  $\nu$  (cm<sup>-1</sup>) 3331 (NH stretch), 2961 (OH stretch), 1699 (C=O stretch), 1331 (S=O stretch), 1177 (CN stretch); HRMS for the sulfonate-urea ion (C<sub>17</sub>H<sub>14</sub>N<sub>3</sub>O<sub>3</sub>S<sup>-</sup>) (ESI<sup>-</sup>):  $m/z$ : act 340.2244 [M], cal: 340.0761 [M].

**Compound 12:** A mixture of 4-(6-methylbenzothiazole-2-yl)aniline (0.48 g, 2.00 mmol) and thiophosgene (0.15 mL, 2 mmol) as a two phase solution of dichloromethane (20 mL) and saturated sodium hydrogen carbonate (20 mL) was stirred for 4 hours at room temp, then transferred to separation funnel, the organic layer was separated and taken to dryness. Then it was re-dissolved in ethyl acetate (30 mL) and tetrabutylammonium aminomethanesulfonate (2.00 mmol) was added and the solution left to reflux overnight. The ethyl acetate was decanted out, the oil taken to dryness, re-dissolved in methanol (5 mL) and ran down an ion exchange column. Ammonia was used to remove the product, with 50 % loss of tetrabutylammonium. The product was then re-dissolved in methanol (10 mL) and excess tetrabutylammonium (2 mL, 2 mmol) was then added and taken to dryness. The oil was re-dissolved in chloroform (30 mL) and water washed (30 mL). The organic layer was taken to dryness leaving a yellow solid as the clean product with a yield of 28 % (0.35 g, 0.55 mmol); Melting point: >200 °C;  $^1\text{H}$  NMR (400MHz, 298K, DMSO- $d_6$ ):  $\delta$ : 0.93 (t,  $J = 7.28$ , 12H), 1.26 – 1.35 (m, 8H), 1.52 – 1.60 (m, 8H), 2.46 (s, 3H), 3.13 – 3.18 (m, 8H), 4.09 (s, 0.6H), 4.32 (s 1.4H), 7.34 (dd,  $J = 8.44$ , 1.48 Hz, 1H), 7.70 – 8.00 (m, 6.7H), 8.71 (s, 0.3H), 10.21 (s, 0.6H), 11.05 (s, 0.2H);  $^{13}\text{C}\{^1\text{H}\}$  NMR (100 MHz, 298 K, DMSO- $d_6$ ):  $\delta$ : 13.5 (CH<sub>3</sub>), 19.2 (CH<sub>2</sub>), 21.1 (CH<sub>3</sub>), 23.1 (CH<sub>2</sub>), 57.5 (CH<sub>2</sub>), 60.2 (CH<sub>2</sub>), 121.7 (ArCH), 121.8 (ArCH), 122.2 (ArCH), 127.3 (ArCH), 127.8 (ArCH), 128.0 (ArC), 134.5 (ArC), 135.0 (ArC), 142.6 (ArC), 151.8 (ArC), 165.9 (ArC), 179.9 (C=O); IR (film):  $\nu$  (cm<sup>-1</sup>) 3242 (NH stretch), 1325 (S=O stretch), 1223 (CN stretch), 1036 (S=O stretch); HRMS for the sulfonate-urea ion (C<sub>16</sub>H<sub>14</sub>N<sub>3</sub>O<sub>3</sub>S<sub>3</sub><sup>-</sup>) (ESI<sup>-</sup>):  $m/z$ : act: 391.1053 [M<sup>-</sup>], cal: 392.0203 [M].

**Compound 13:** This compound was synthesised in line with our previously published methods. Proton NMR were found to match our previously published.<sup>11</sup>

**Compound 14:** This compound was synthesised in line with our previously published methods. Proton NMR were found to match our previously published.<sup>11</sup>

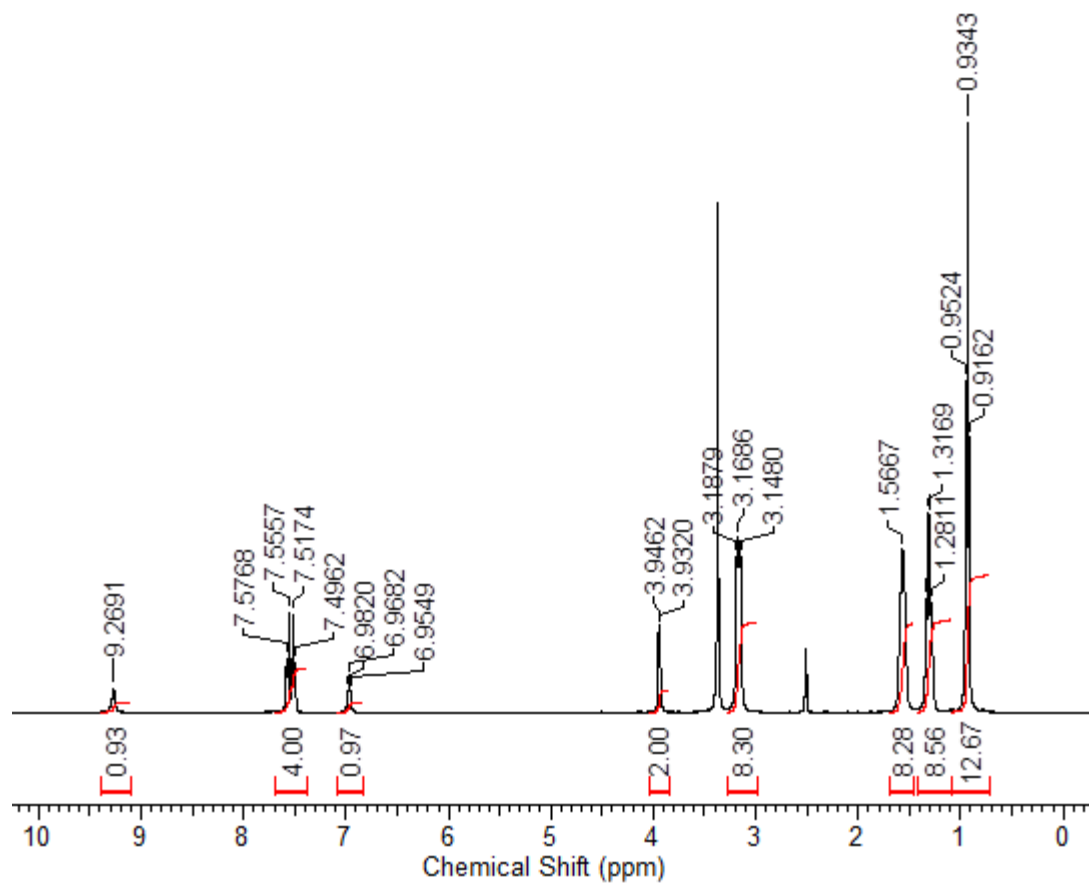

Figure S2 -  $^1\text{H}$  NMR of compound **1** in  $\text{DMSO-d}_6$  conducted at 298.15 K.

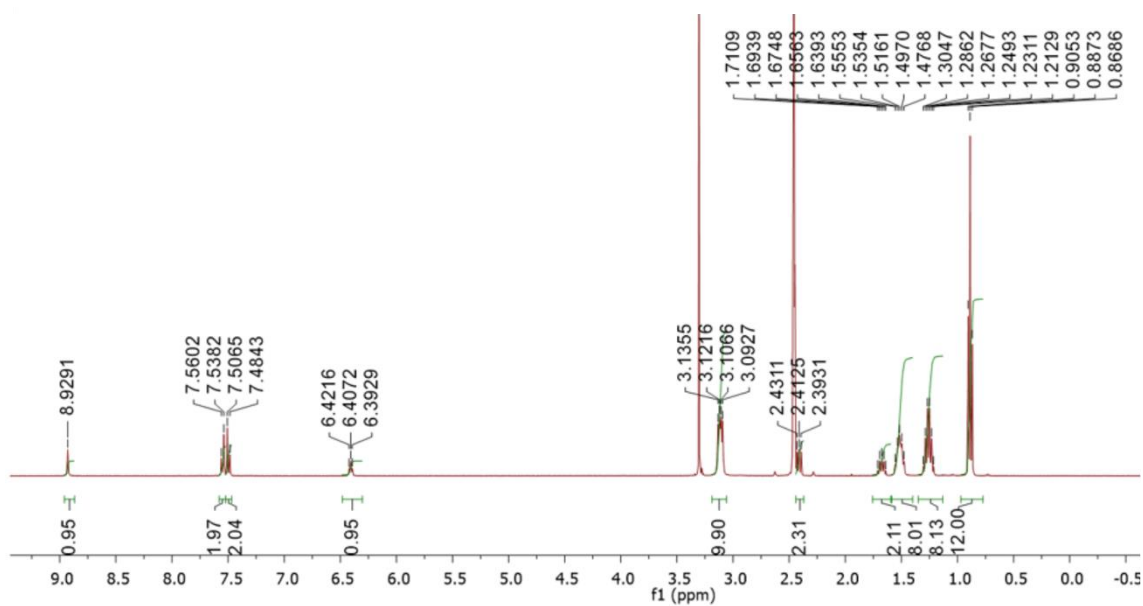

Figure S3 -  $^1\text{H}$  NMR of compound **2** in  $\text{DMSO-d}_6$  conducted at 298.15 K.

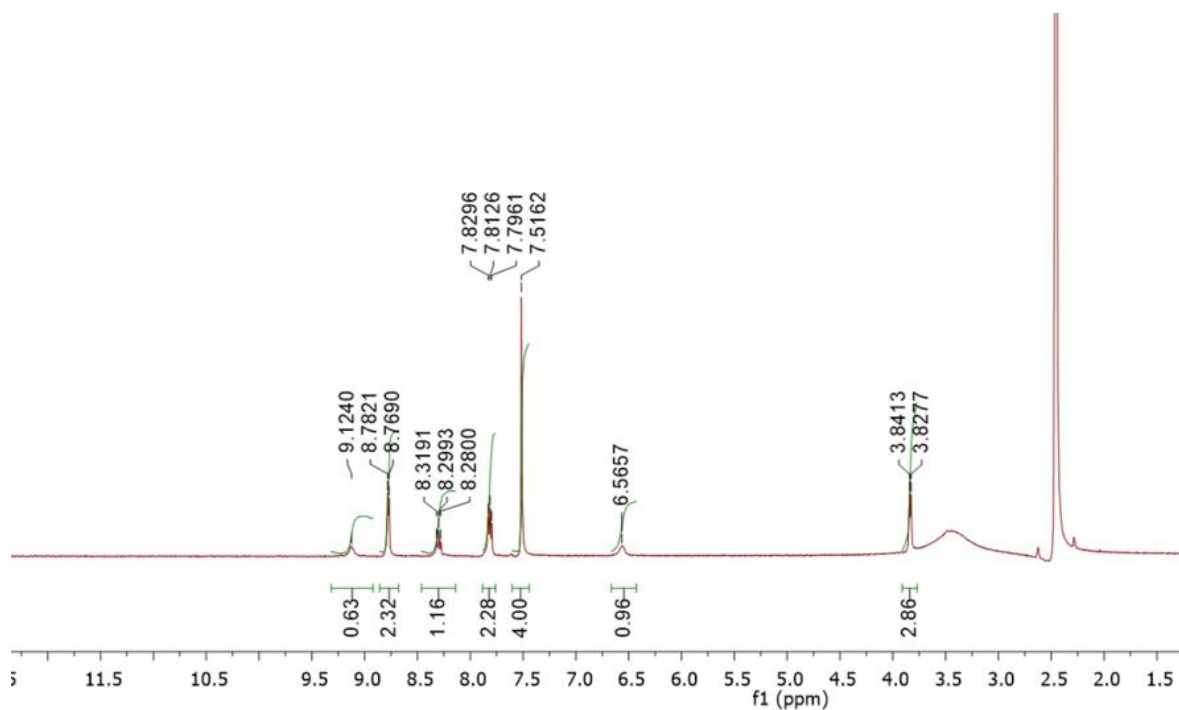

Figure S4 -  $^1\text{H}$  NMR of compound **3** in  $\text{DMSO-d}_6$  conducted at 298.15 K.

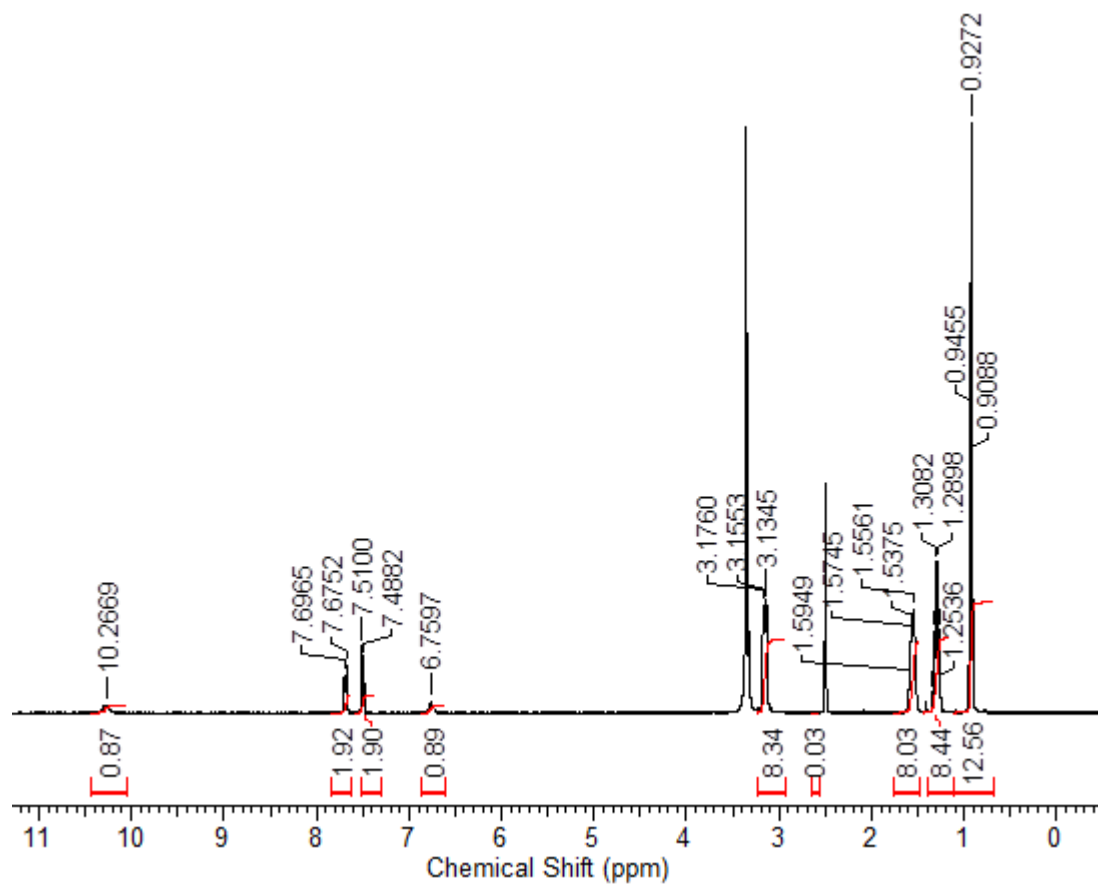

Figure S5 -  $^1\text{H}$  NMR of compound **4** in  $\text{DMSO-d}_6$  conducted at 298.15 K.

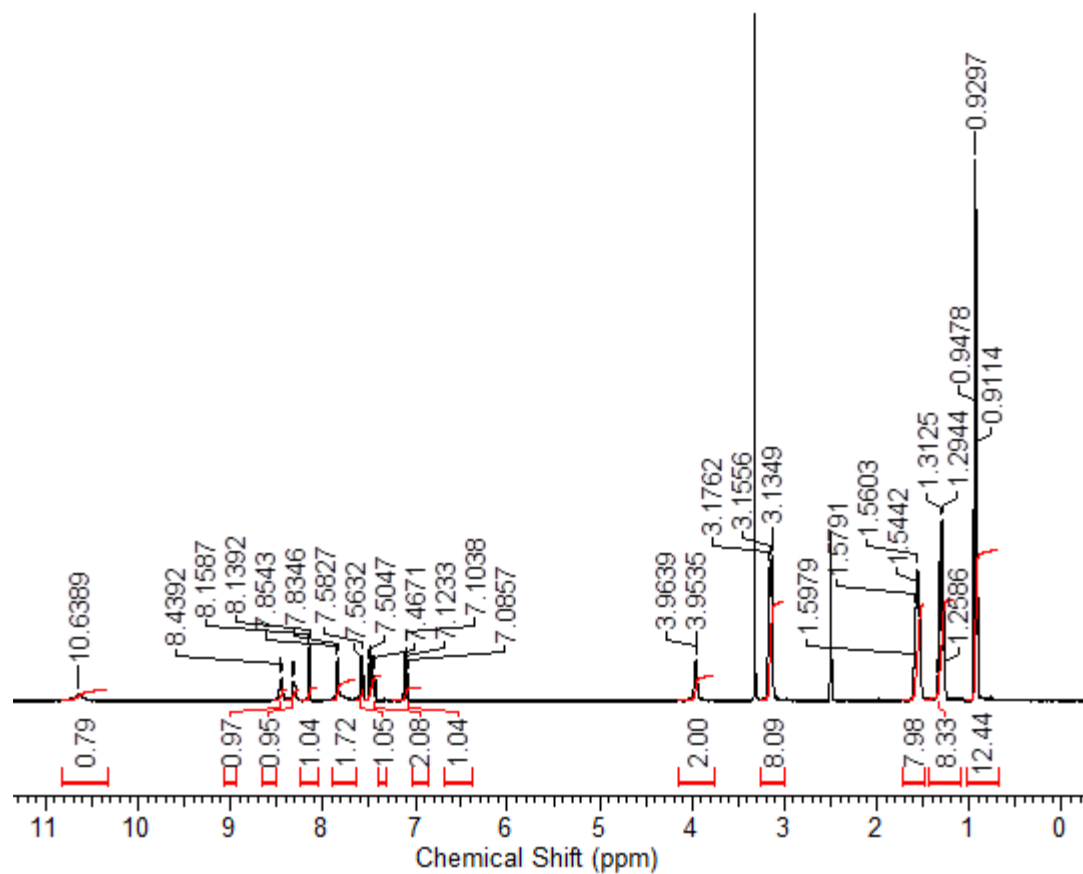

Figure S6 -  $^1\text{H}$  NMR of compound **5** in  $\text{DMSO-d}_6$  conducted at 298.15 K.

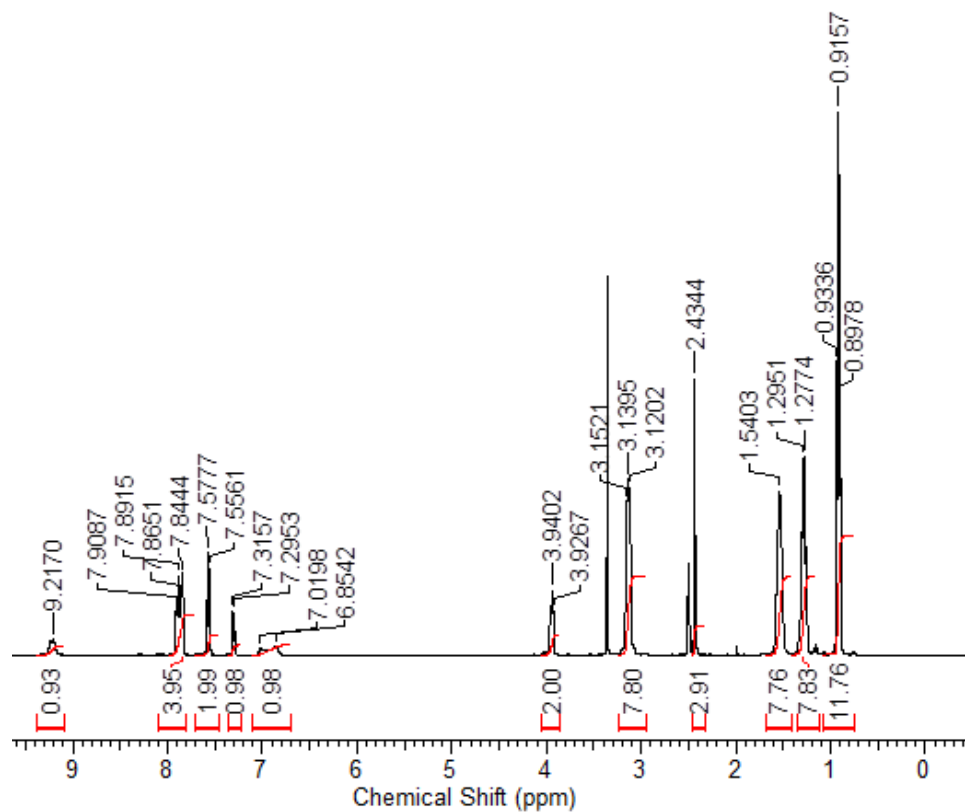

Figure S7 -  $^1\text{H}$  NMR of compound **6** in  $\text{DMSO-d}_6$  conducted at 298.15 K.



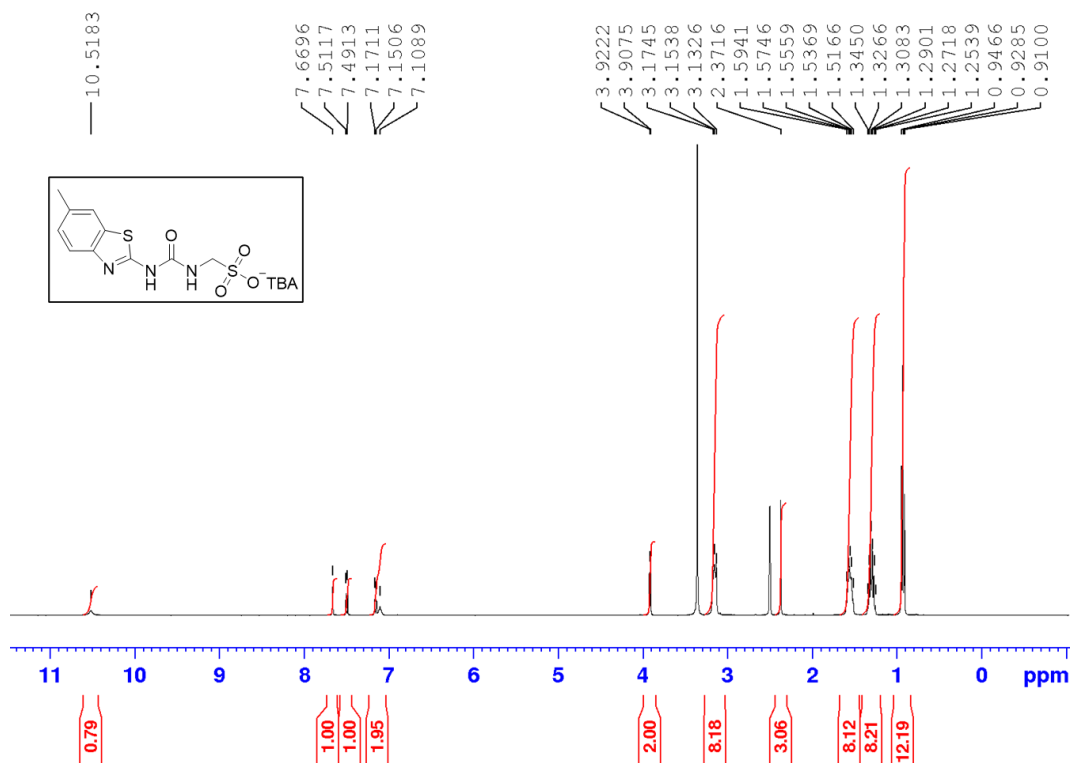

Figure S8 - <sup>1</sup>H NMR of compound **7** in DMSO-d<sub>6</sub> conducted at 298.15 K.

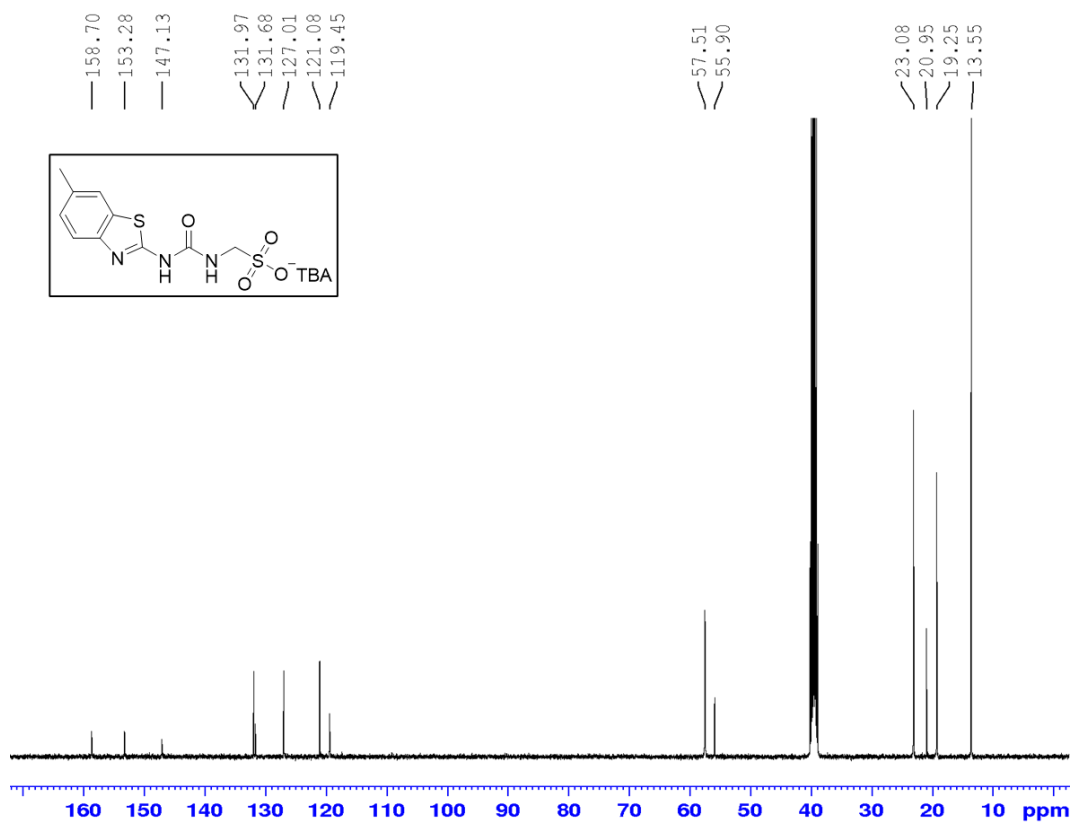

Figure S9 - <sup>13</sup>C NMR of compound **7** in DMSO-d<sub>6</sub> conducted at 298.15 K.

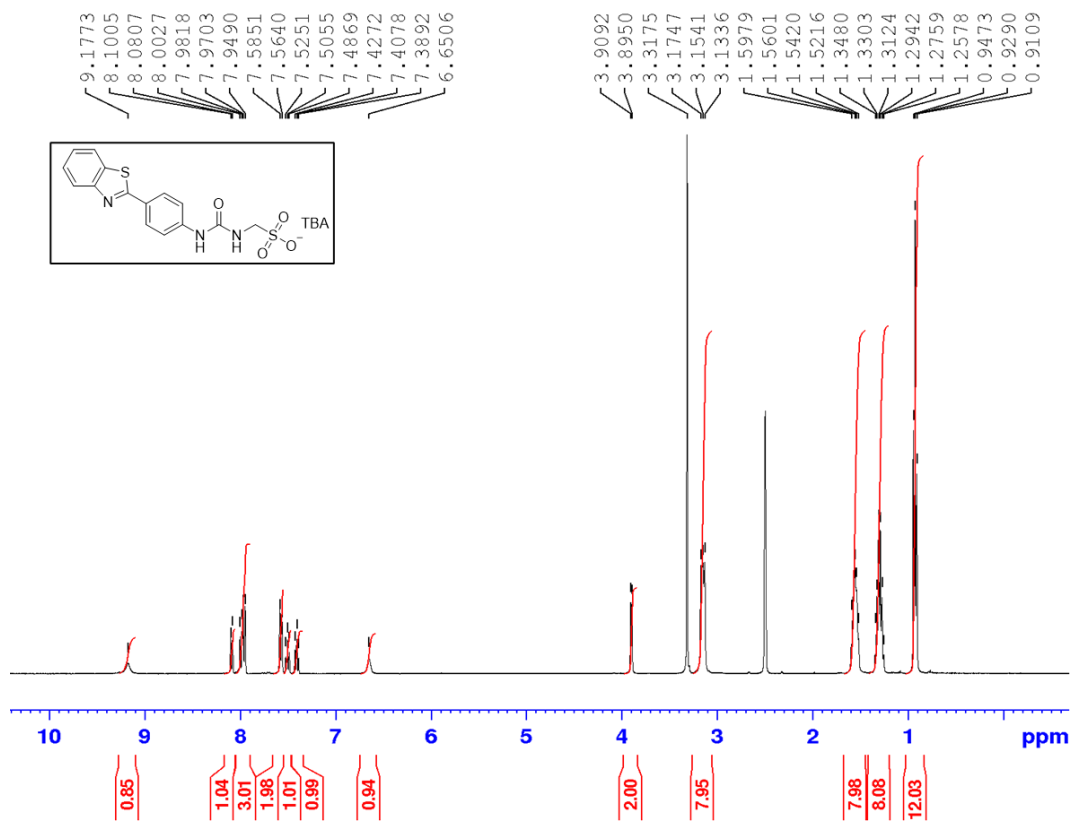

Figure S10 - <sup>1</sup>H NMR of compound **8** in DMSO-d<sub>6</sub> conducted at 298.15 K.

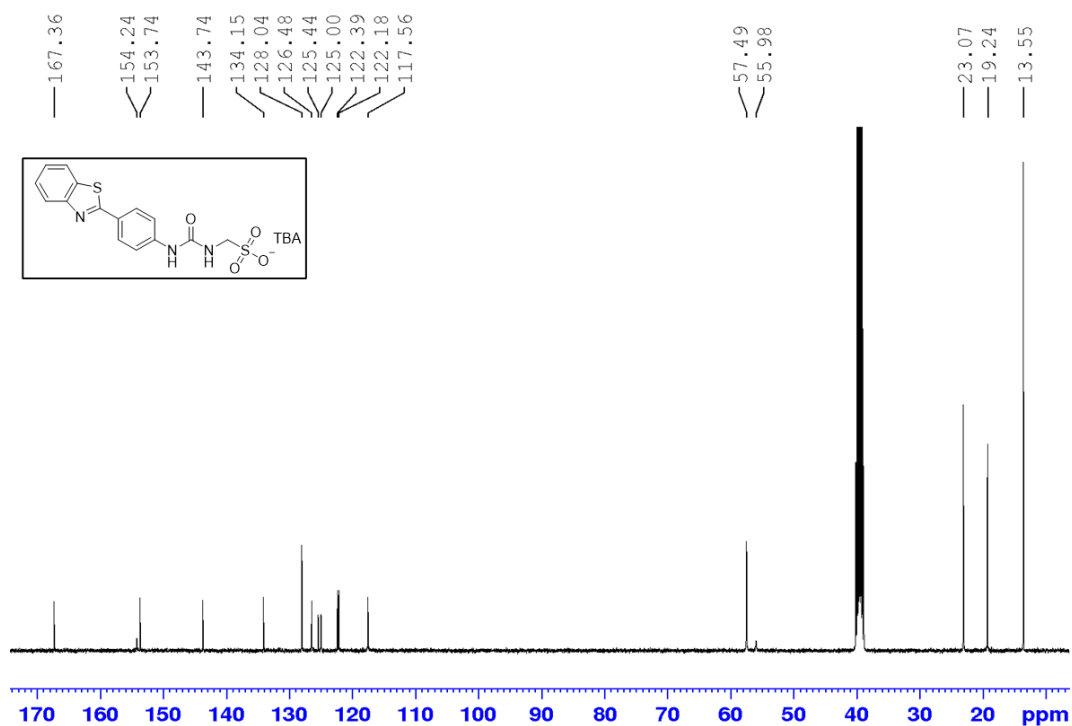

Figure S11 - <sup>13</sup>C NMR of compound **8** in DMSO-d<sub>6</sub> conducted at 298.15 K.

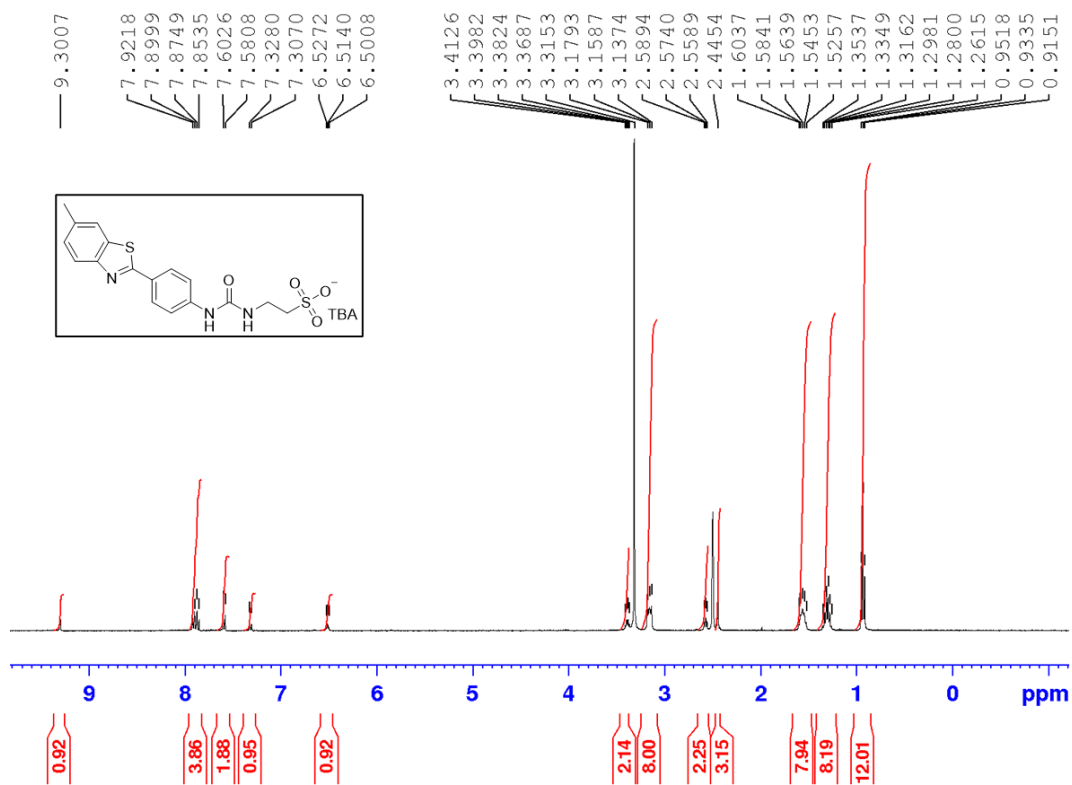

Figure S12 - <sup>1</sup>H NMR of compound 9 in DMSO-d<sub>6</sub> conducted at 298.15 K.

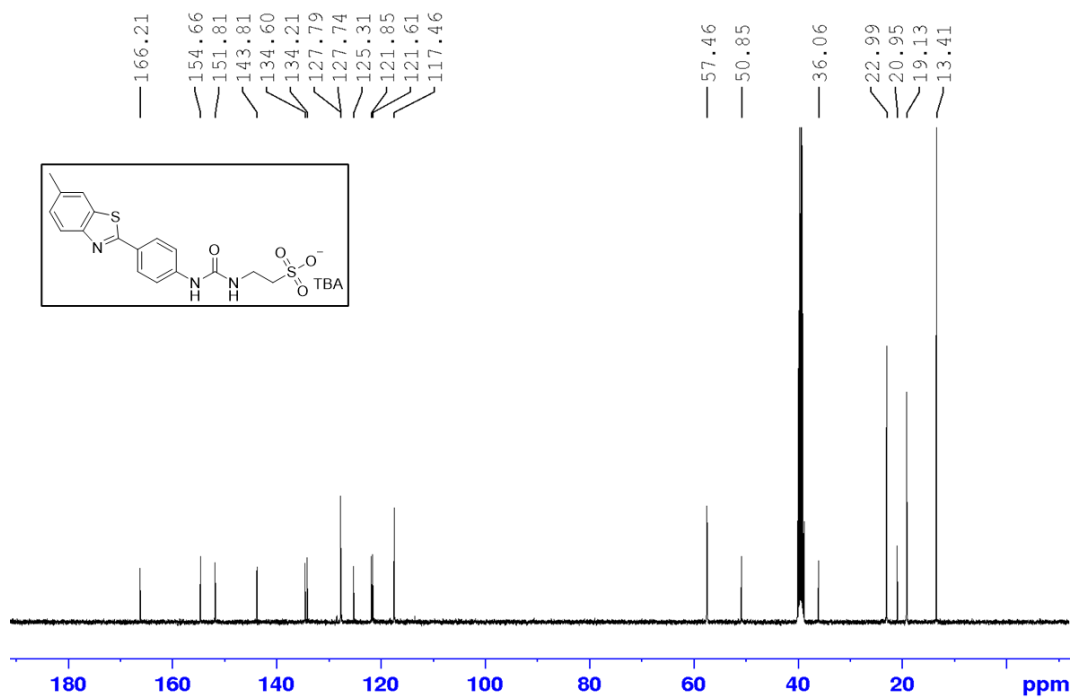

Figure S13 - <sup>13</sup>C NMR of compound 9 in DMSO-d<sub>6</sub> conducted at 298.15 K.

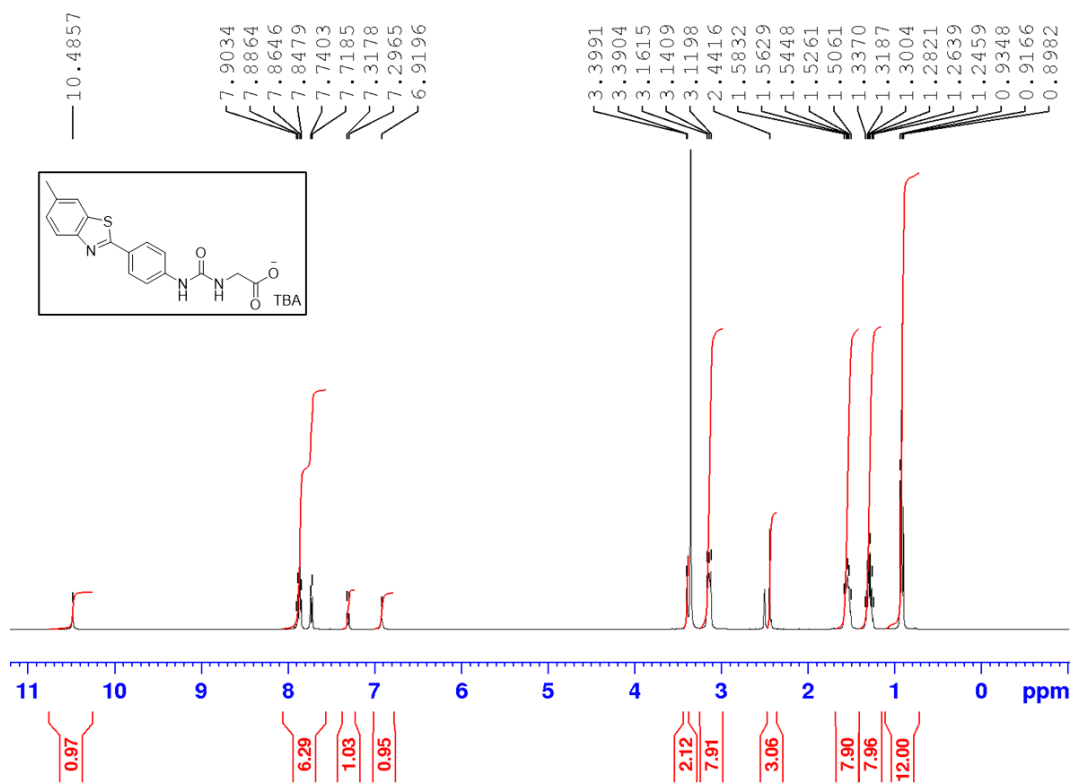

Figure S14 - <sup>1</sup>H NMR of compound **11** in DMSO-d<sub>6</sub> conducted at 298.15 K.

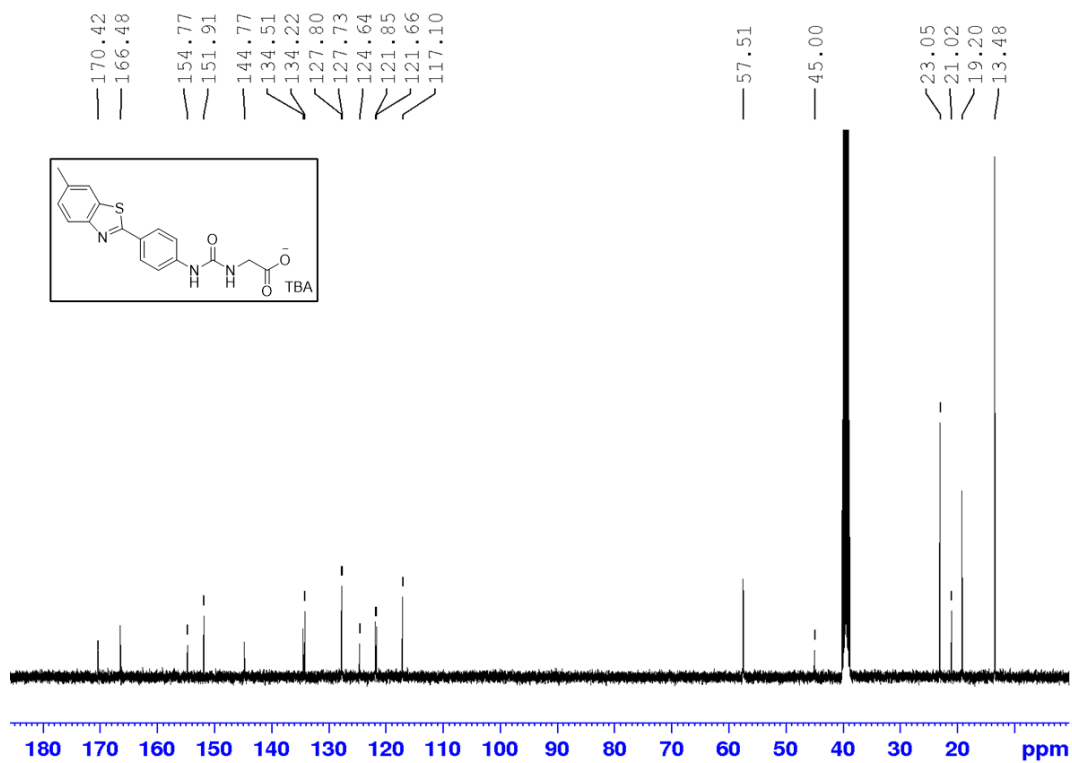

Figure S15 - <sup>13</sup>C NMR of compound **11** in DMSO-d<sub>6</sub> conducted at 298.15 K.

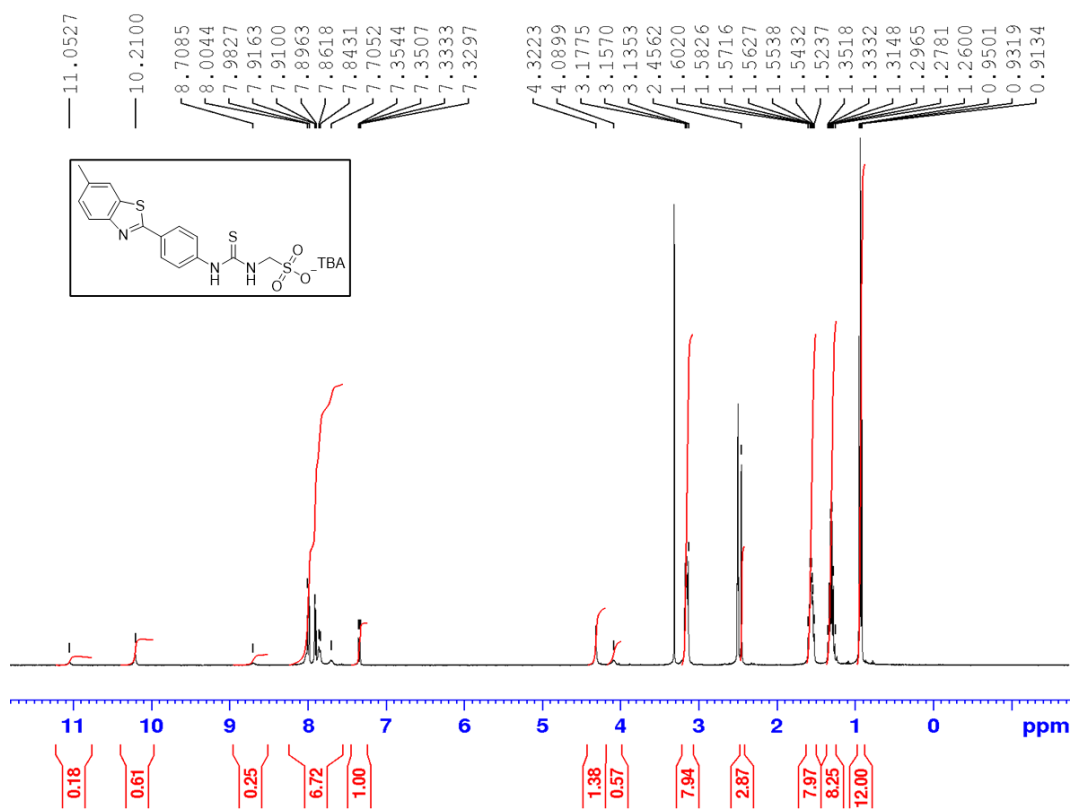

Figure S16 – <sup>1</sup>H NMR of compound 12 in DMSO-d<sub>6</sub> conducted at 298.15 K.

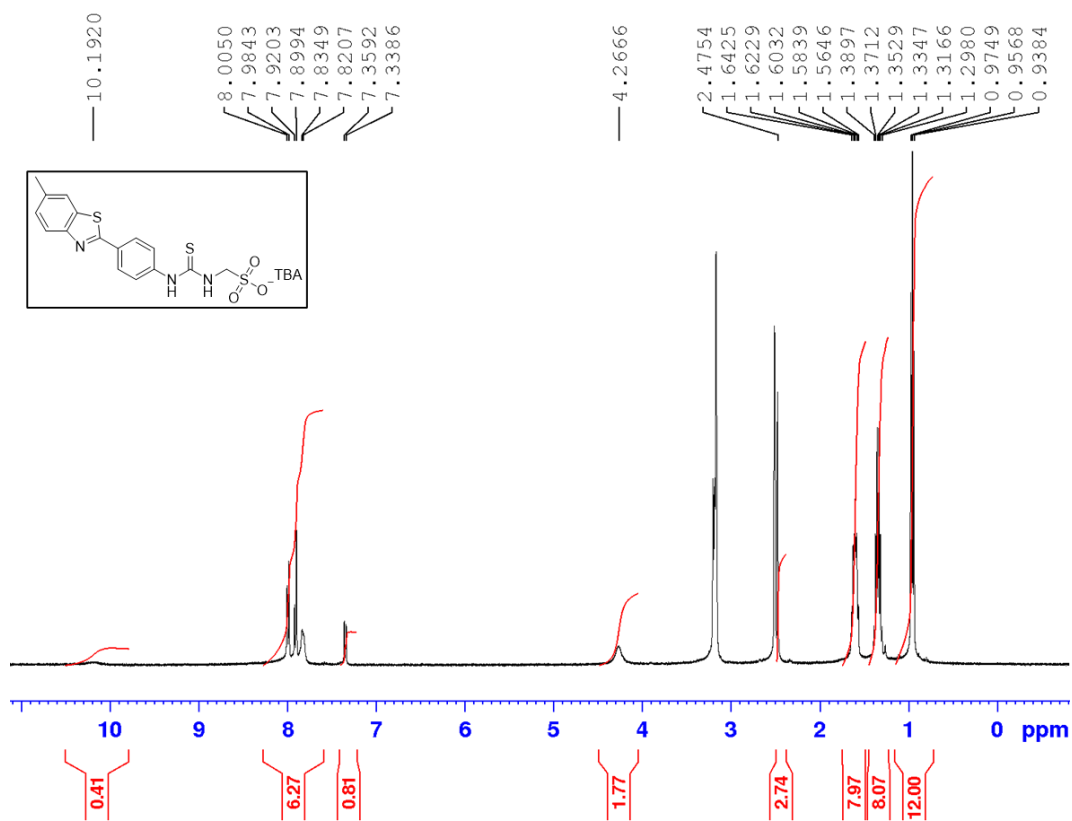

Figure S17 – <sup>1</sup>H NMR of compound 12 in DMSO-d<sub>6</sub> conducted at 333 K.

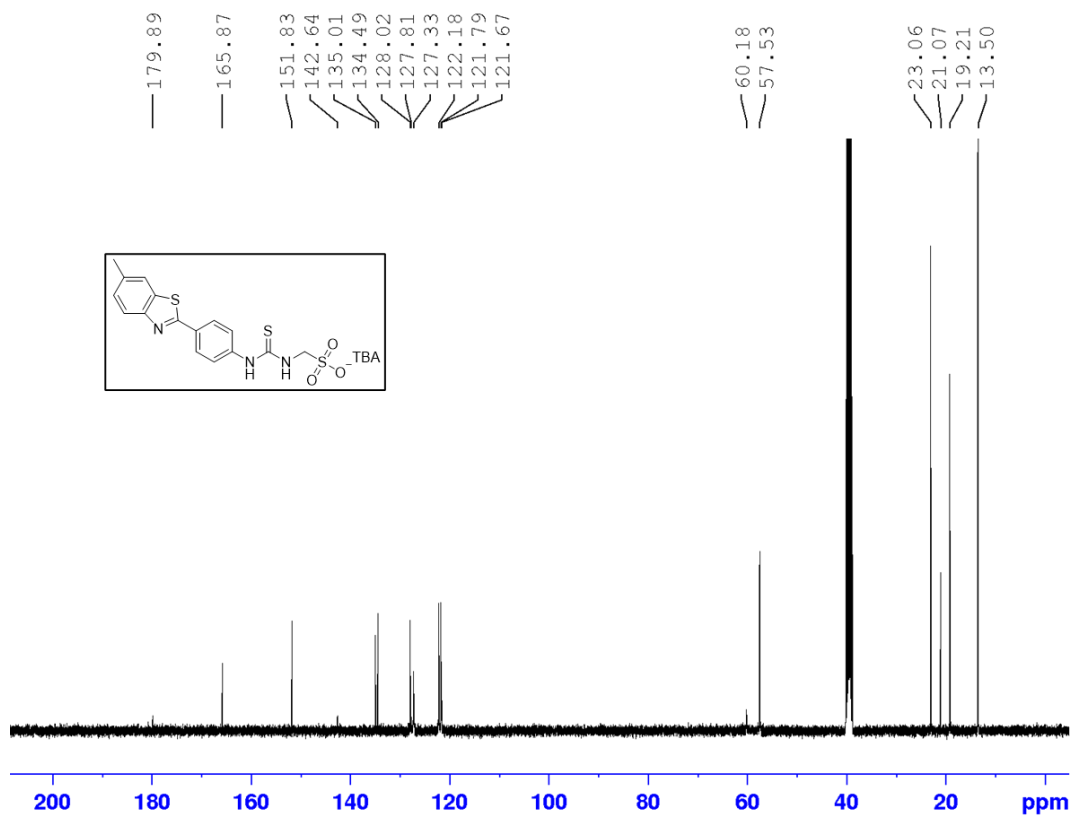

Figure S18 – <sup>13</sup>C NMR of compound **12** in DMSO-d<sub>6</sub> conducted at 298.15 K.

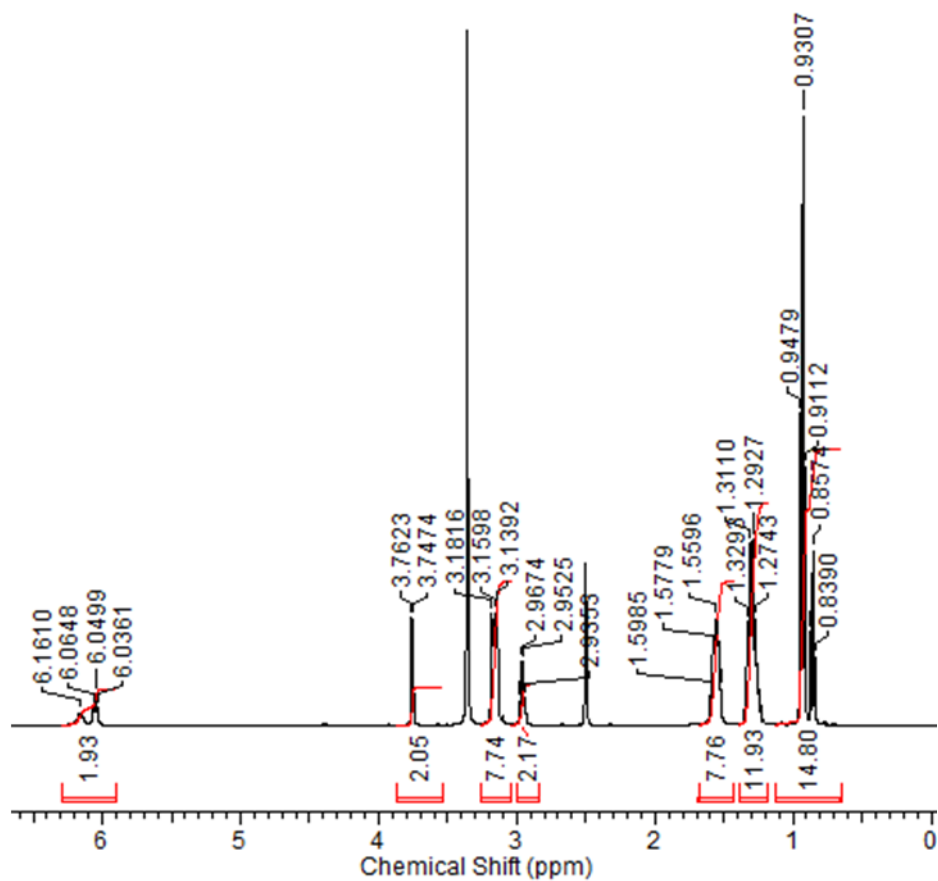

Figure S19 – <sup>1</sup>H NMR of compound **13** in DMSO-d<sub>6</sub> conducted at 298.15 K.

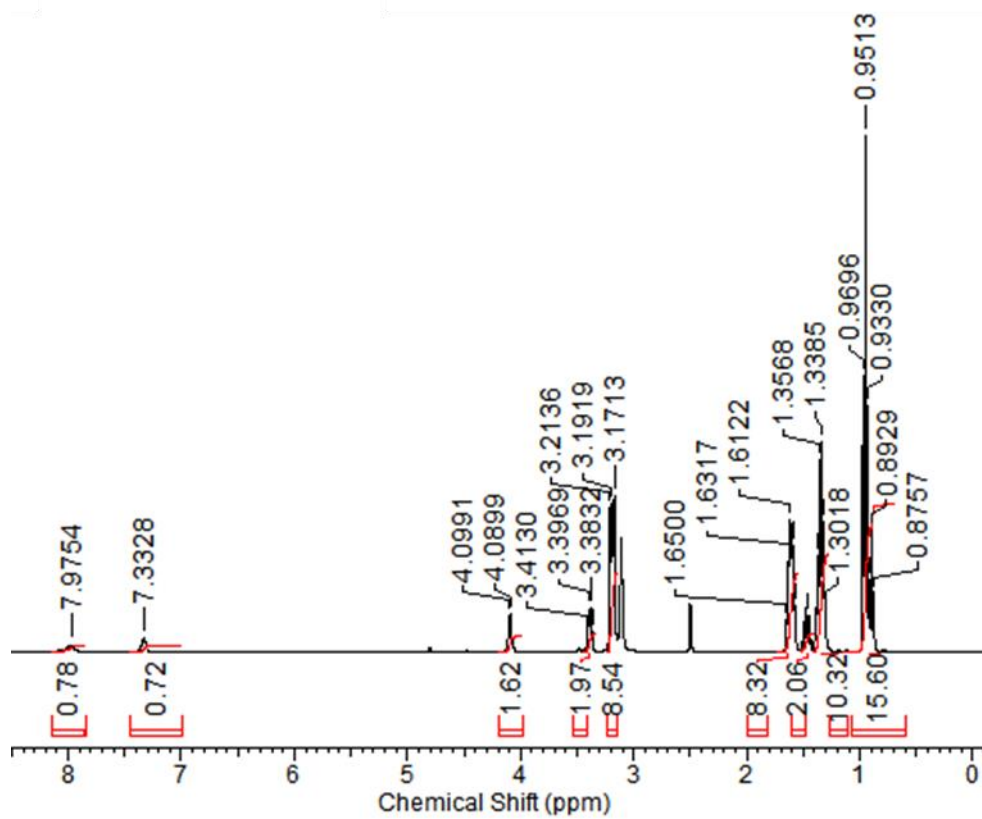

Figure S20 –  $^1\text{H}$  NMR of compound **14** in  $\text{DMSO-}d_6$  conducted at 333.15 K.

## Section 6: Antimicrobial Screening Data

USA 300 Methicillin-resistant *Staphylococcus aureus* (MRSA)

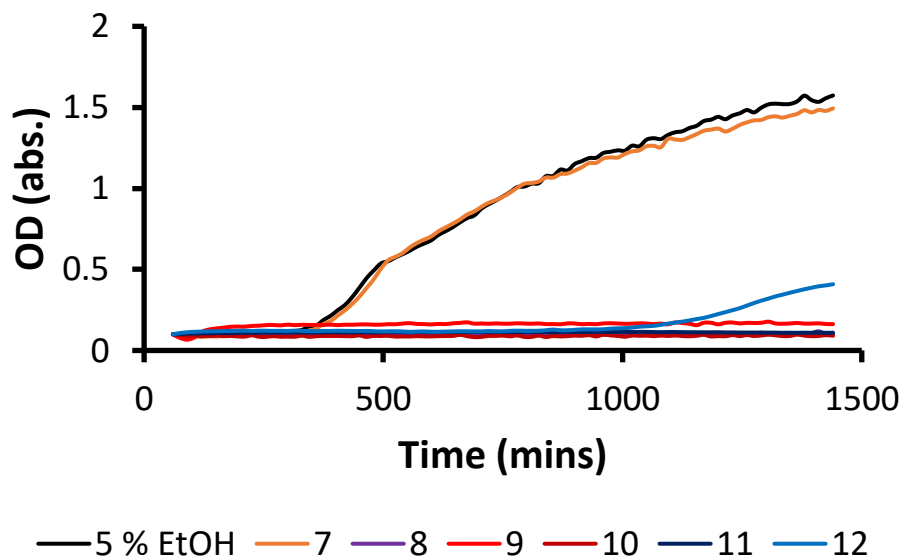

Figure S21 - MRSA growth curves created from an average of 6 optical density readings in the presence of compounds **7**, **8**, **9**, **10**, **11** and **12**.

*Escherichia coli* (*E. coli*) DH10B

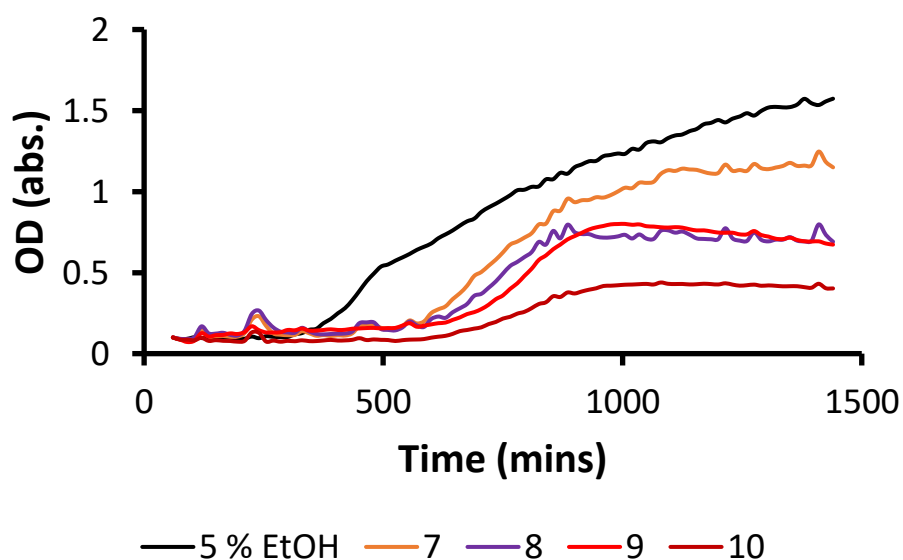

Figure S22 - *E. coli* growth curves created from an average of 6 optical density readings in the presence of compounds **7**, **8**, **9** and **10**.



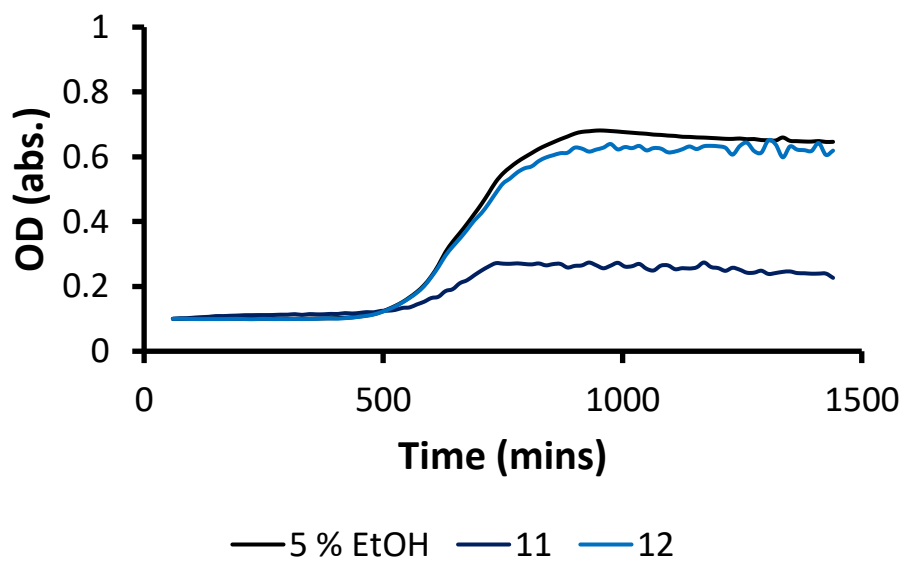

Figure S23 - E. coli growth curves created from an average of 6 optical density readings in the presence of compounds **11** and **12**.

## Section 7: Full Growth Curve Data

USA 300 Methicillin-resistant *Staphylococcus aureus* (MRSA)

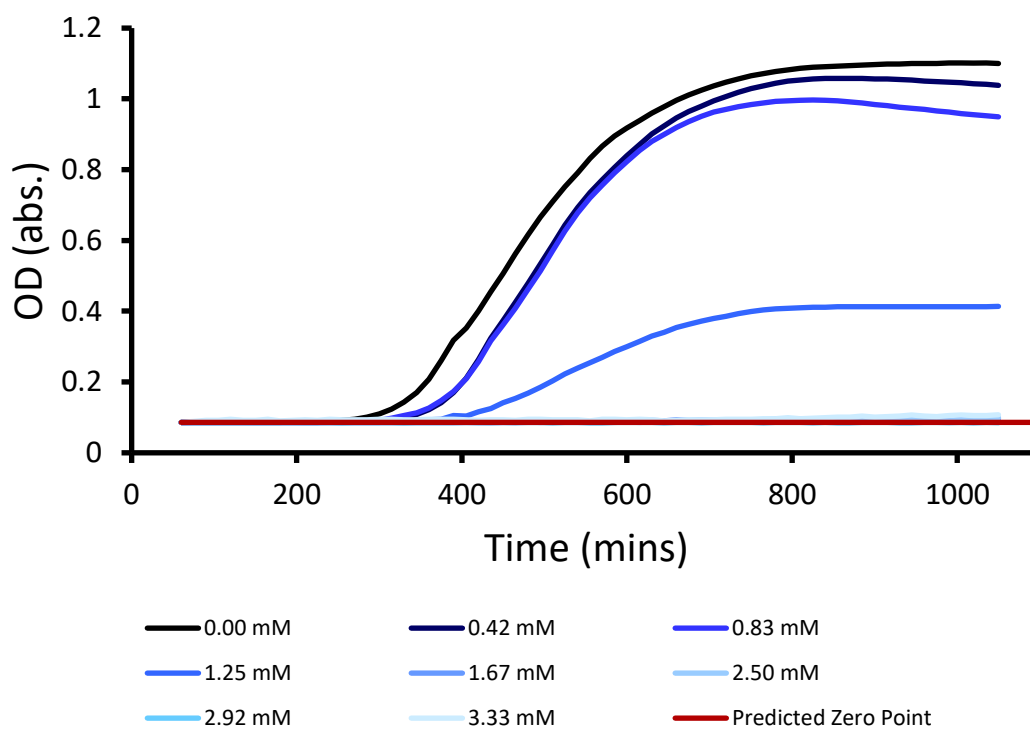

Figure S24 - MRSA USA 300 growth curves created from an average of 6 optical density readings for each concentration in the presence of compound 8 at varying concentrations.

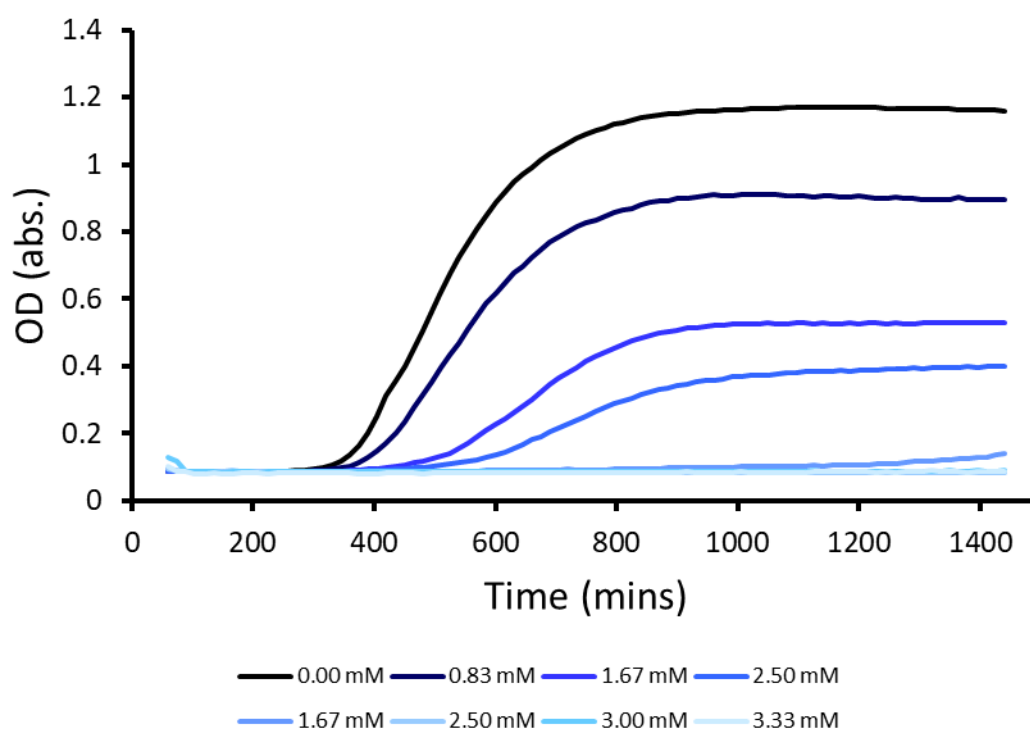

Figure S25 - MRSA USA 300 growth curves created from an average of 6 optical density readings for each concentration in the presence of compound 9 at varying concentrations.

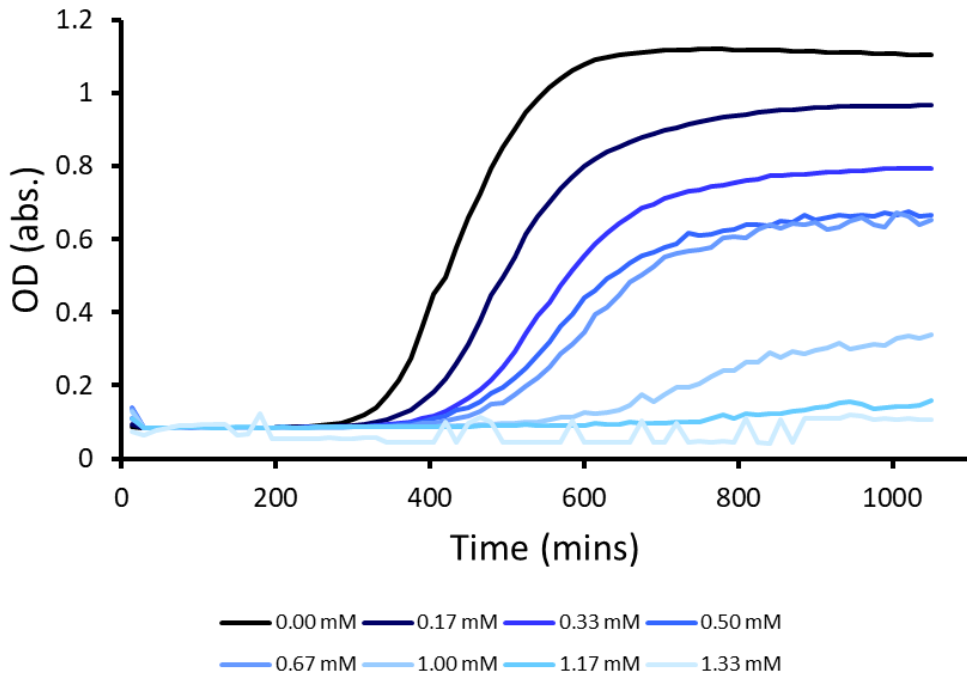

Figure S26 - MRSA USA 300 growth curves created from an average of 6 optical density readings for each concentration in the presence of compound **10** at varying concentrations.

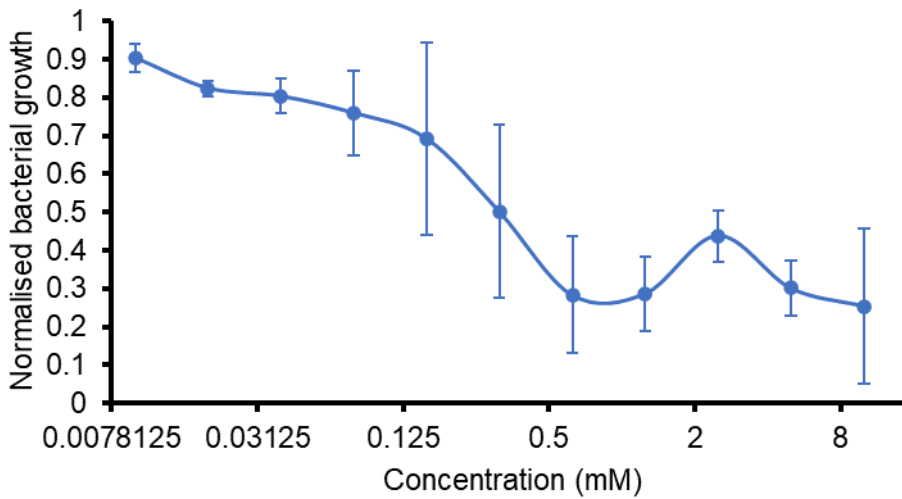

Figure S27 – MRSA USA 300 growth curves created from an average of 6 optical density readings for each concentration in the presence of compound **11** at varying concentrations.

*Escherichia coli* (*E. coli*)

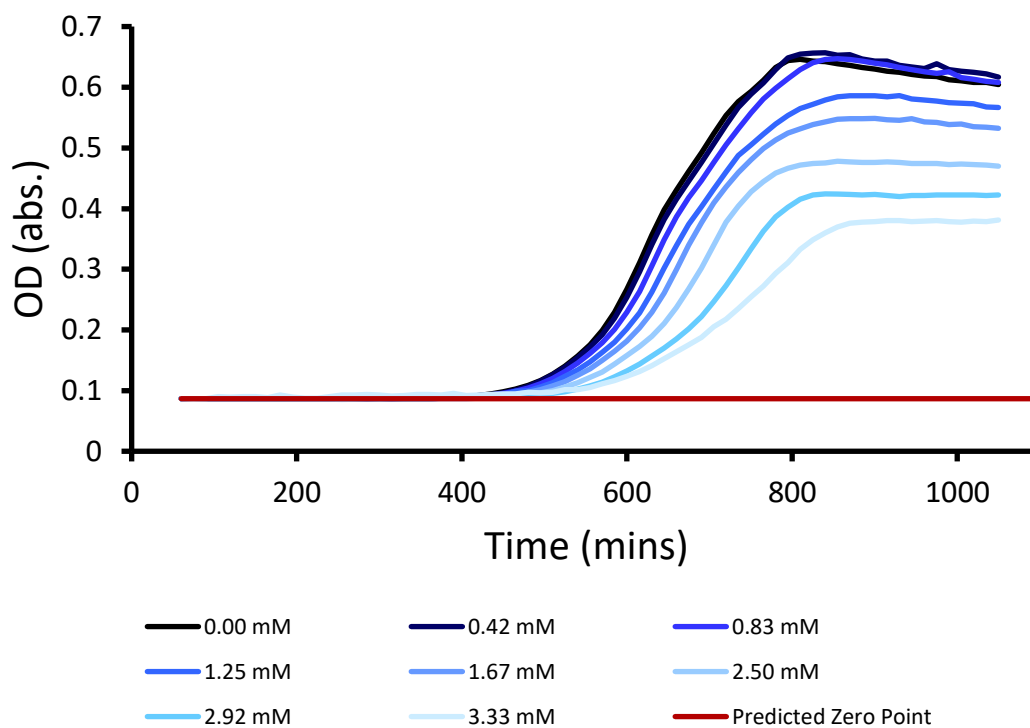

Figure S28 - *E. coli* DH10B growth curves created from an average of 6 optical density readings for each concentration in the presence of compound 8 at varying concentrations.

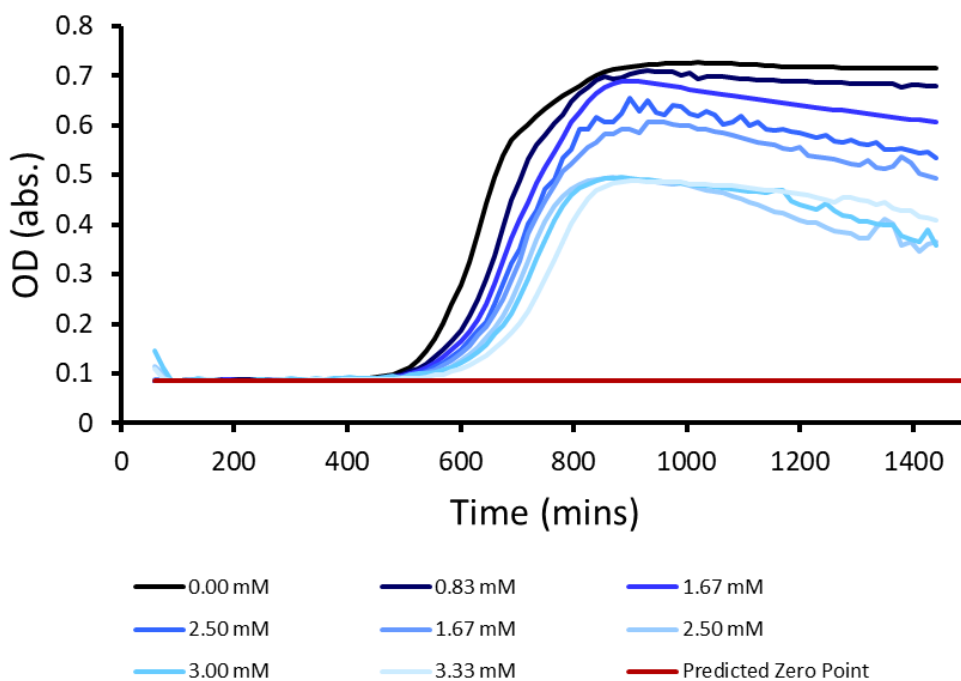

Figure S29 - *E. coli* DH10B growth curves created from an average of 6 optical density readings for each concentration in the presence of compound 9 at varying concentrations.

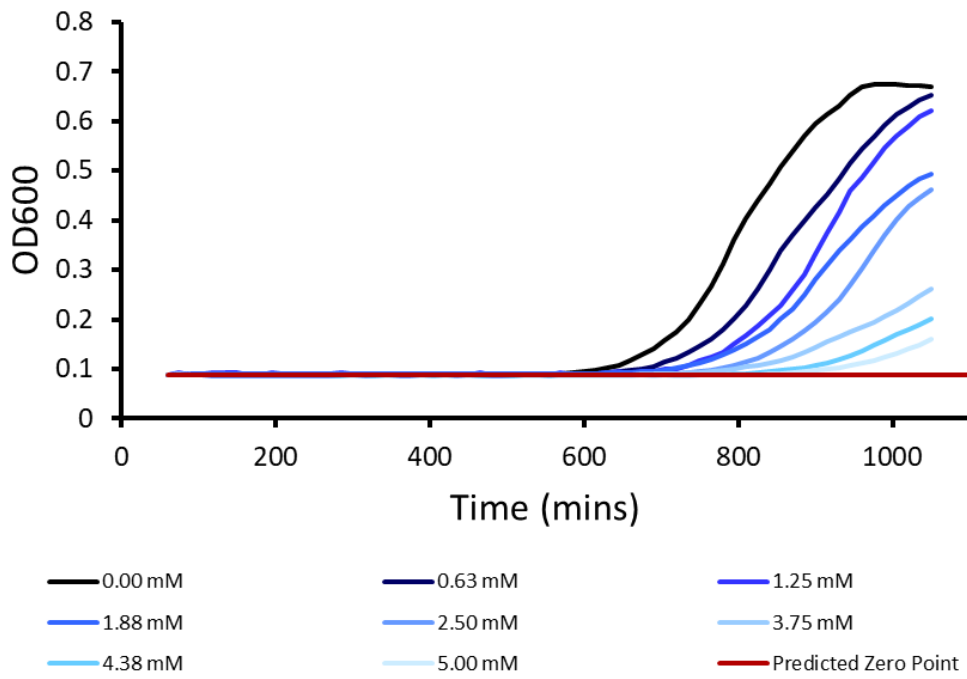

Figure S30 - *E. coli* DH10B growth curves created from an average of 6 optical density readings for each concentration in the presence of compound **10** at varying concentrations.

## Section 8: MIC<sub>50</sub> Determination

USA 300 Methicillin-resistant *Staphylococcus aureus* (MRSA)

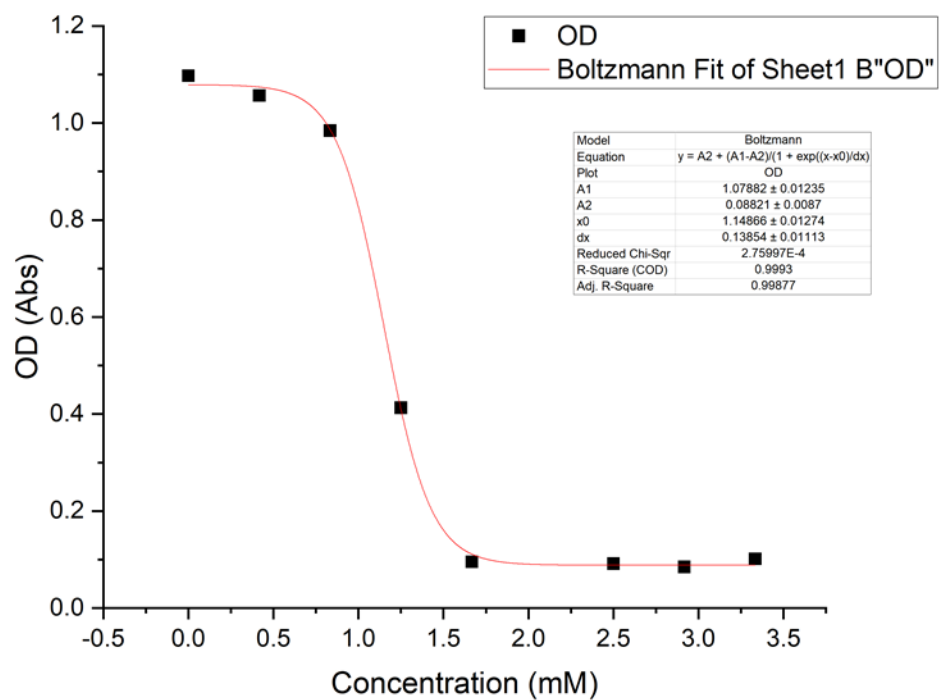

Figure S31 - Boltzmann fit used to calculate MIC<sub>50</sub> using optical density values at 900 minutes for compound **8** at varying concentrations.

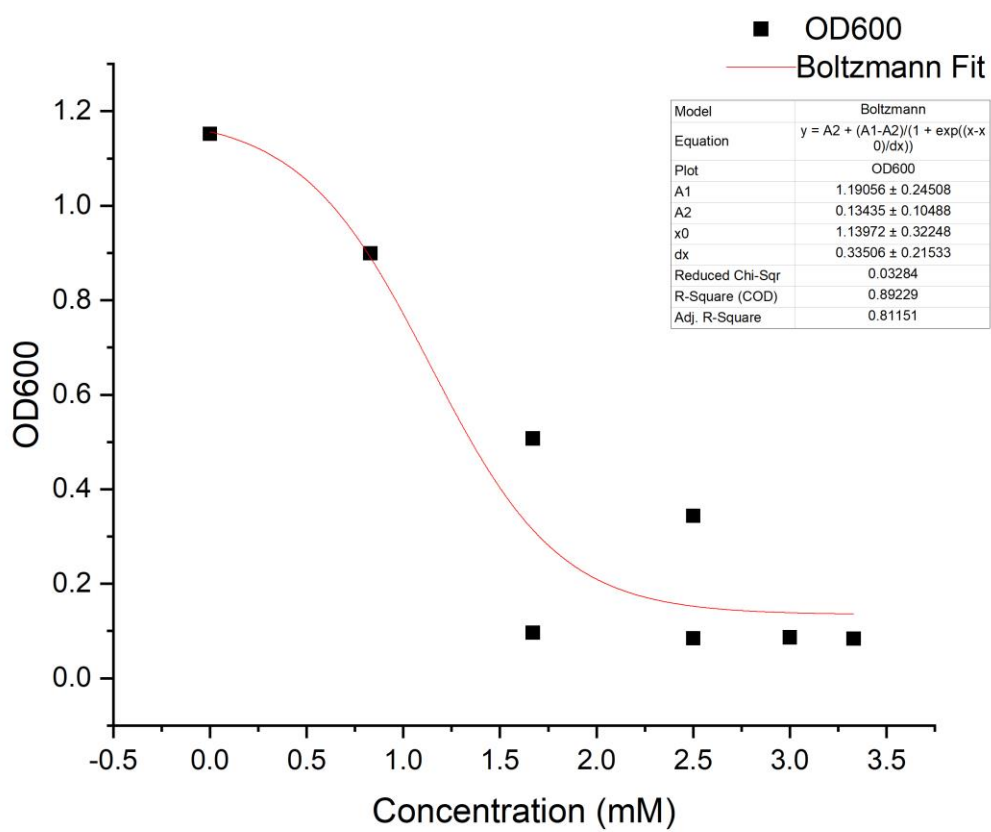

Figure S32 - Boltzmann fit used to calculate MIC<sub>50</sub> using optical density values at 900 minutes for compound **9** at varying concentrations.

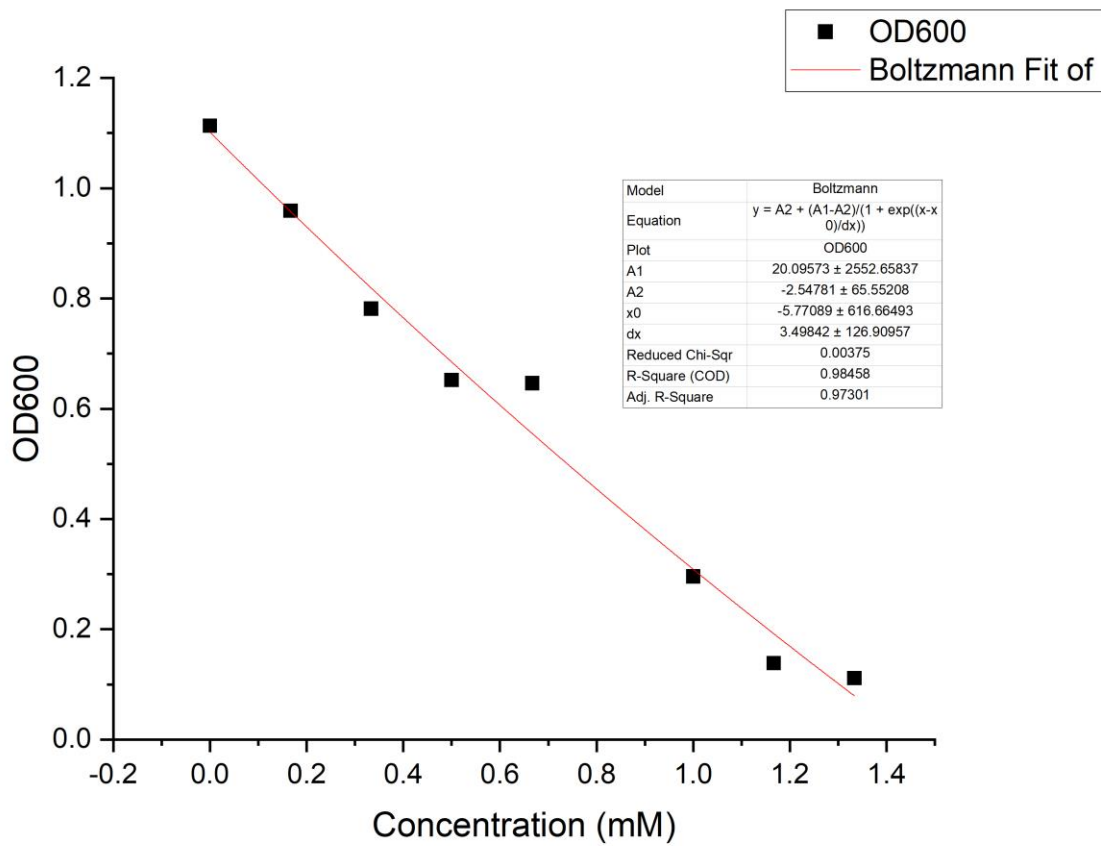

Figure S33 - Boltzmann fit used to calculate MIC<sub>50</sub> using optical density values at 900 minutes for compound **10** at varying concentrations.



*Escherichia coli* (*E. coli*)

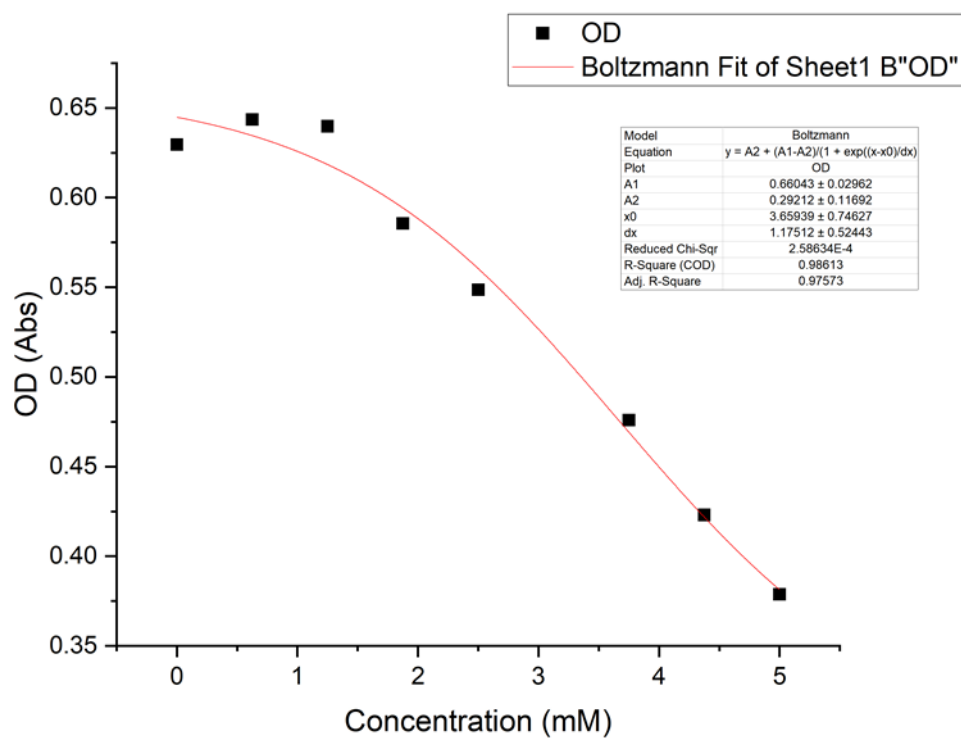

Figure S34 - Boltzmann fit used to calculate MIC<sub>50</sub> using optical density values at 900 minutes for compound **8** at varying concentrations.

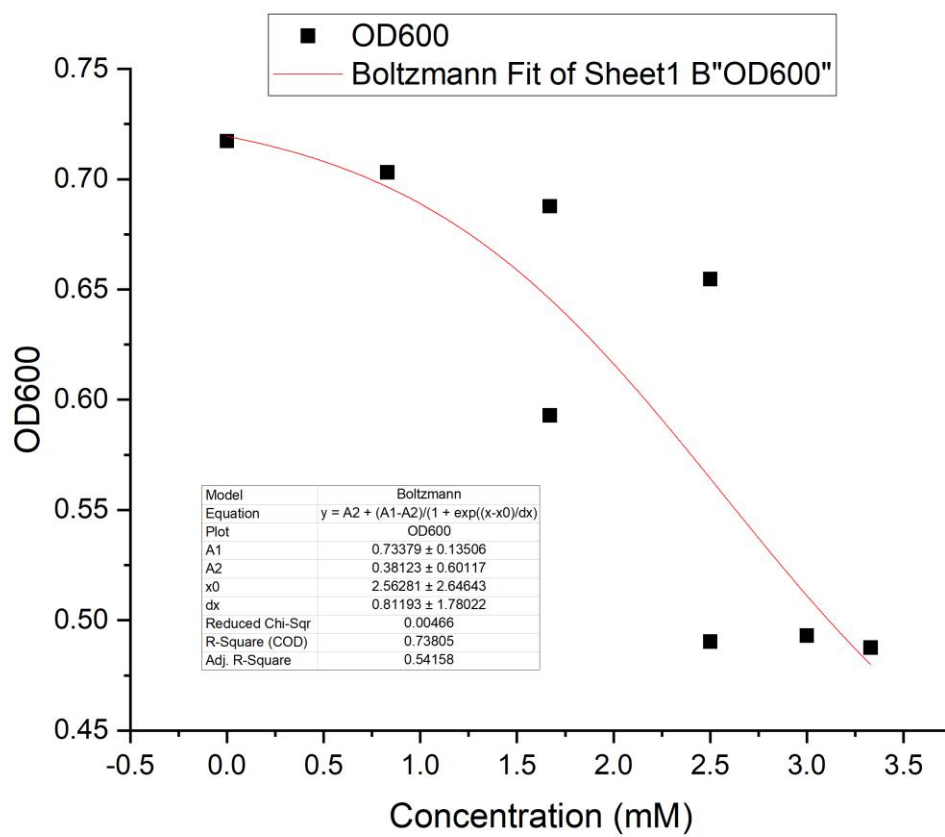

Figure S35 - Boltzmann fit used to calculate MIC<sub>50</sub> using optical density values at 900 minutes for compound 9 at varying concentrations.

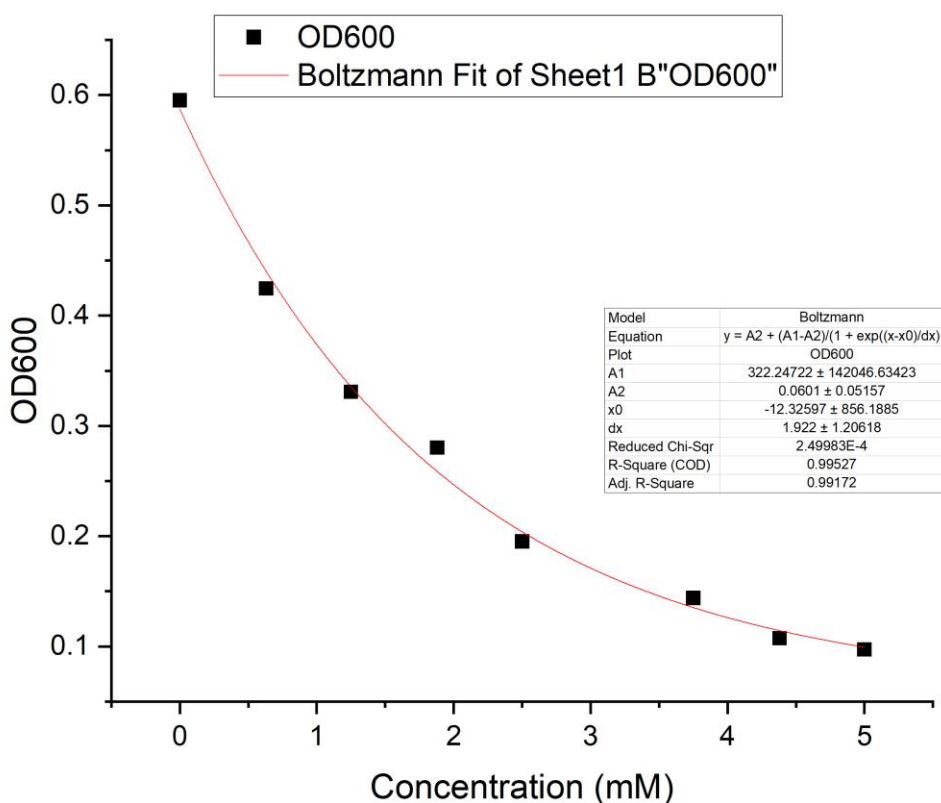

Figure S36 - Boltzmann fit used to calculate MIC<sub>50</sub> using optical density values at 900 minutes for compound **10** at varying concentrations.

Table S3 - MIC<sub>50</sub> values (µg/mL) determined for **1 – 14** against clinically relevant Gram-positive MRSA USA300 and model Gram-negative *E. coli* DH10B bacteria (n = 3) at an initial calibrated cell concentration equal to the 0.5 McFarland standard, after 900 mins. Here the number included within the bracket represents the ranking of the SSAs antimicrobial efficacy, with 1 = most active antimicrobial agent. Please see ESI Section 3 for further experimental details.

| SSA      | MRSA     | <i>E. coli</i> | SSA       | MRSA                        | <i>E. coli</i> |
|----------|----------|----------------|-----------|-----------------------------|----------------|
| <b>1</b> | 248      | 2078           | <b>8</b>  | 696                         | 2214           |
| <b>2</b> | <i>a</i> | 840            | <b>9</b>  | 759.50                      | 1367           |
| <b>3</b> | 132      | Fail           | <b>10</b> | 382                         | 750            |
| <b>4</b> | 574      | 630            | <b>11</b> | 181-367 <sup><i>b</i></sup> | <i>a</i>       |
| <b>5</b> | 599      | 2159           | <b>12</b> | <i>a</i>                    | <i>c</i>       |
| <b>6</b> | 576      | 3107           | <b>13</b> | 1992                        | <i>c</i>       |
| <b>7</b> | Fail     | Fail           | <b>14</b> | 1436                        | 2821           |

*a* = MIC<sub>50</sub> value could not be determined due to compound solubility. *b* = MIC<sub>50</sub> values are estimated due to data quality. *c* = SSA did not pass initial antimicrobial screening, exhibited < 10 % inhibition of growth at 3.3 mM after 900 mins and therefore excluded from further study.

## Section 9: Surface Tension and Critical Micelle Concentration (CMC) Determination

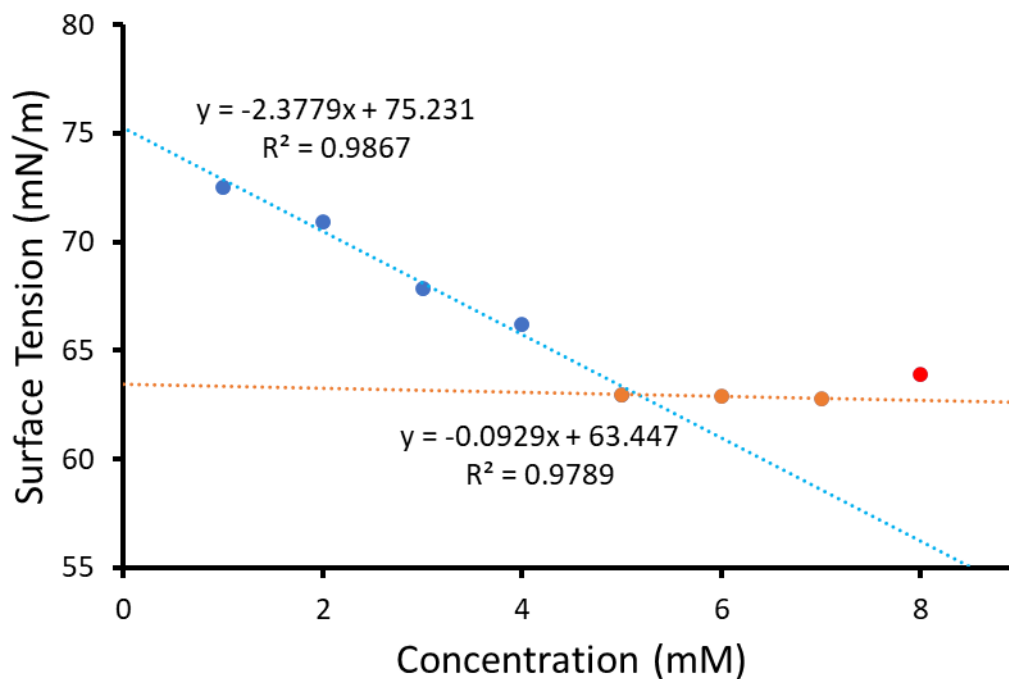

Figure S37 - Calculation of CMC (5.16 mM) for compound **8** in an EtOH:H<sub>2</sub>O 1:19 mixture using surface tension measurements.

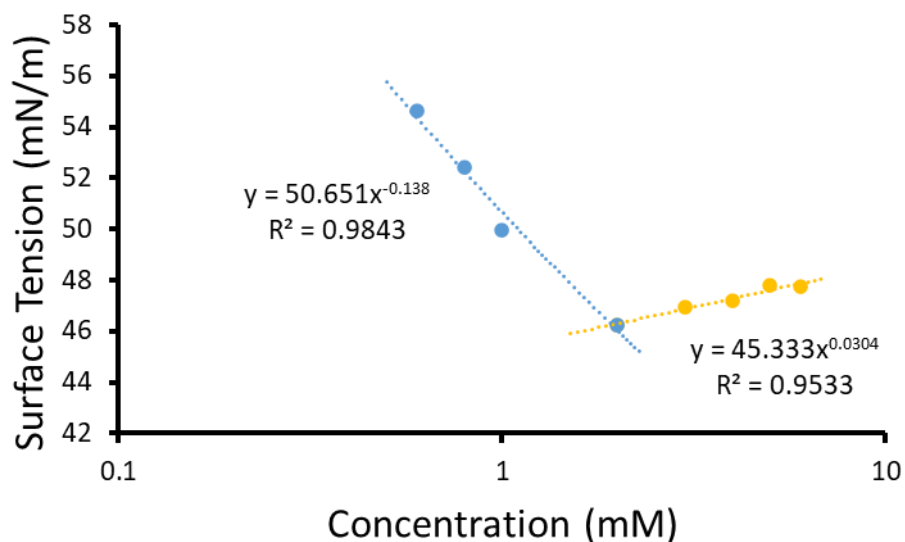

Figure S38 - Calculation of CMC (1.92 mM) for compound **9** in an EtOH:H<sub>2</sub>O 1:19 mixture using surface tension measurements.

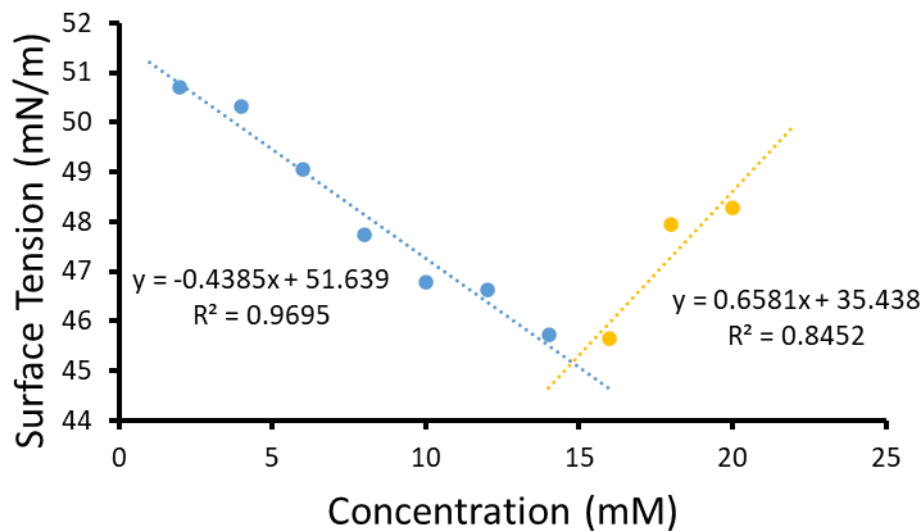

Figure S39 - Calculation of CMC (14.77 mM) for compound **10** in an EtOH:H<sub>2</sub>O 1:19 mixture using surface tension measurements.

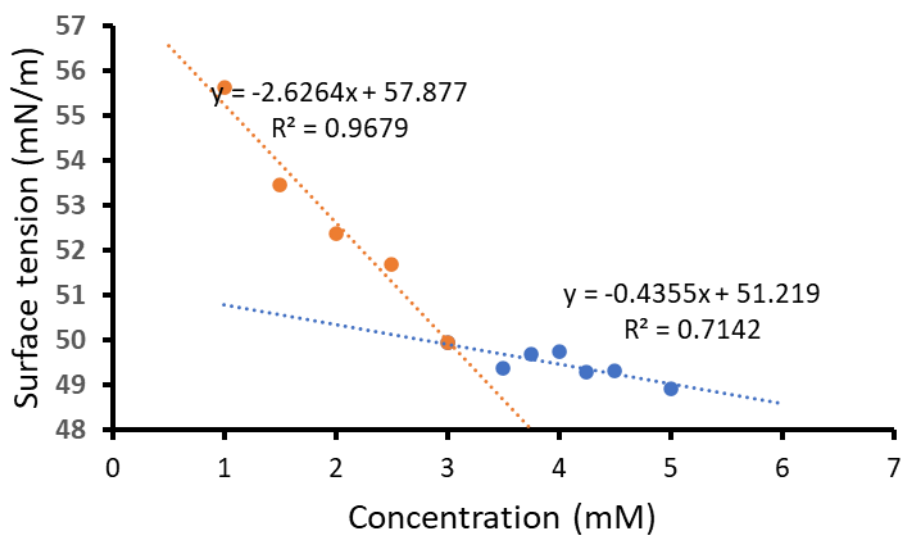

Figure S40 - Calculation of CMC (3.03 mM) for compound **11** in an EtOH:H<sub>2</sub>O 1:19 mixture using surface tension measurements.

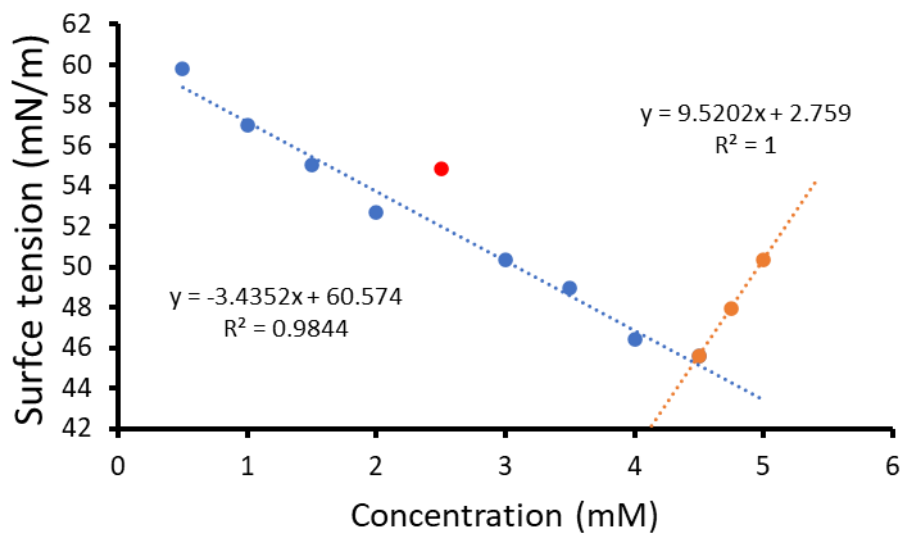

Figure S41 - Calculation of CMC (4.56 mM) for compound **12** in an EtOH:H<sub>2</sub>O 1:19 mixture using surface tension measurements.

## Section 10: Vesicle Leakage Assay Data

Initial comparative datasets

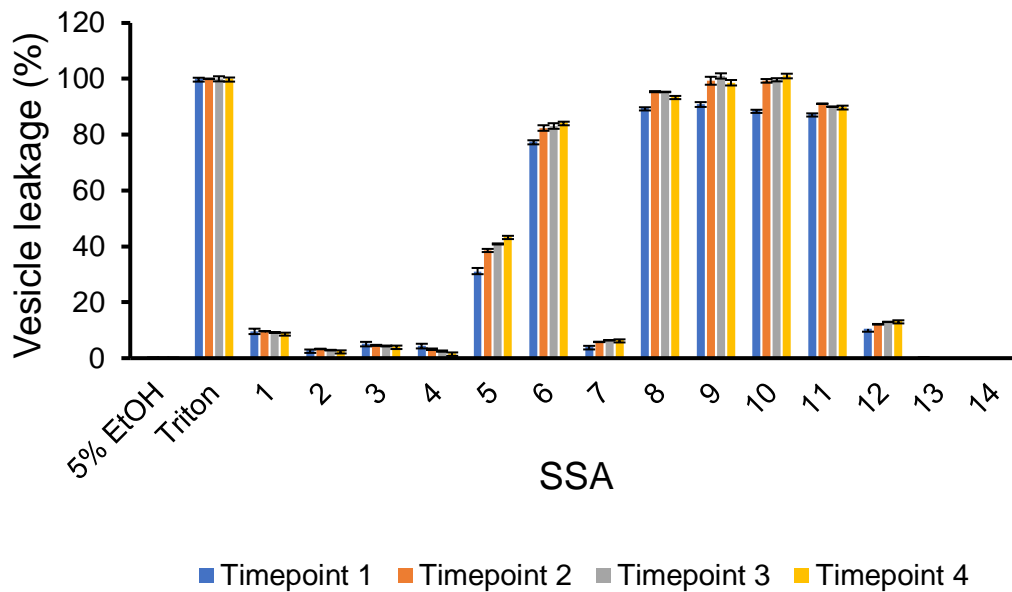

Figure S42 – The percentage lysis of PC lipid membranes ( $\lambda_{em} = 515$  nm) following the addition of a series of SSAs (1.5 mM). Time points 1-4 refer to 30 secs, 5 mins, 10 mins and 15 mins respectively. Triton X-100 (1%) was used as a positive control for 100 % cell lysis.

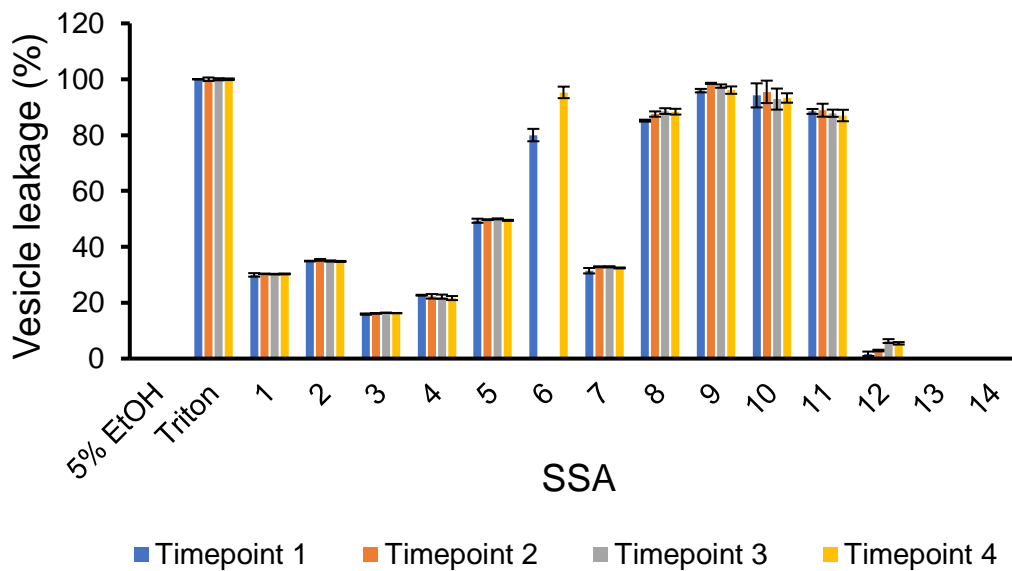

Figure S43 – The percentage lysis of PG lipid membranes ( $\lambda_{em} = 515$  nm) following the addition of a series of SSAs (1.5 mM). Time points 1-4 refer to 30 secs, 5 mins, 10 mins and 15 mins respectively. Triton X-100 (1%) was used as a positive control for 100 % cell lysis.

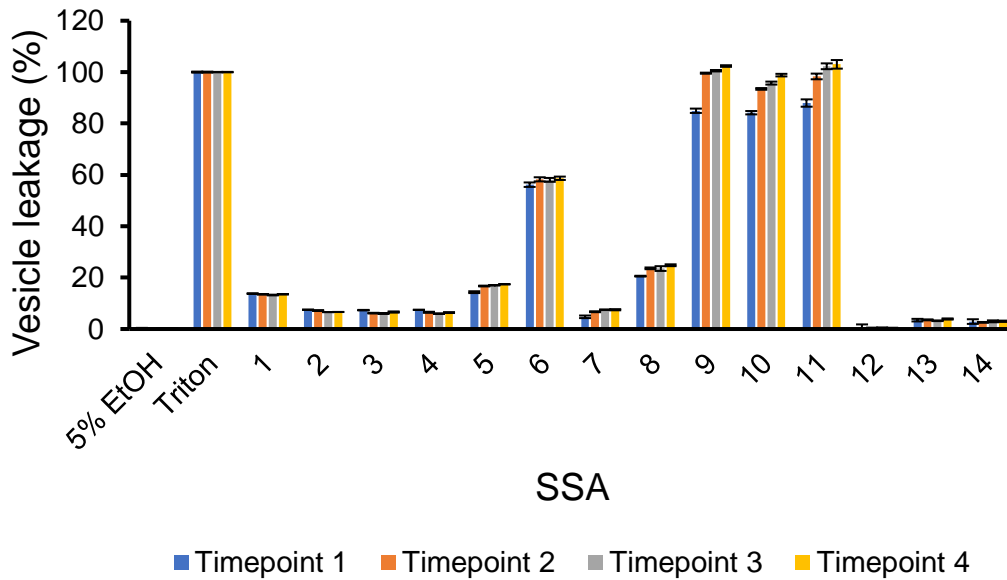

Figure S44 – The percentage lysis of PE:PG 3:1 lipid membranes ( $\lambda_{em} = 515 \text{ nm}$ ) following the addition of a series of SSAs (1.5 mM). Time points 1-4 refer to 30 secs, 5 mins, 10 mins and 15 mins respectively. Triton X-100 (1%) was used as a positive control for 100 % cell lysis.

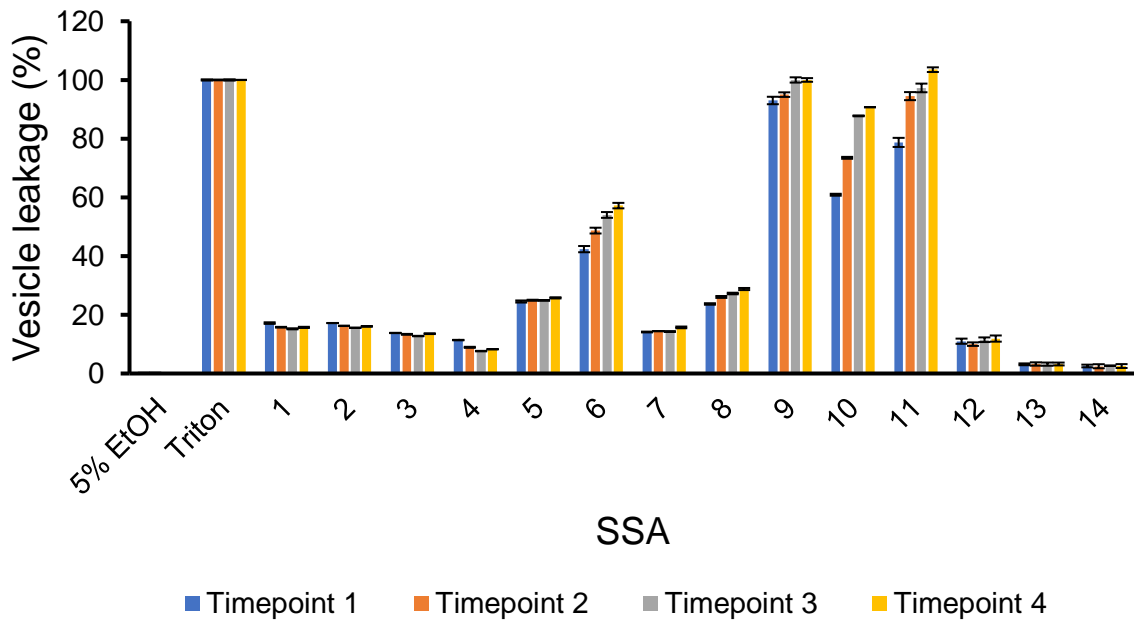

Figure S45 – The percentage lysis of *E. coli* total lipid membranes ( $\lambda_{em} = 515 \text{ nm}$ ) following the addition of a series of SSAs (1.5 mM). Time points 1-4 refer to 30 secs, 5 mins, 10 mins and 15 mins respectively. Triton X-100 (1%) was used as a positive control for 100 % cell lysis.



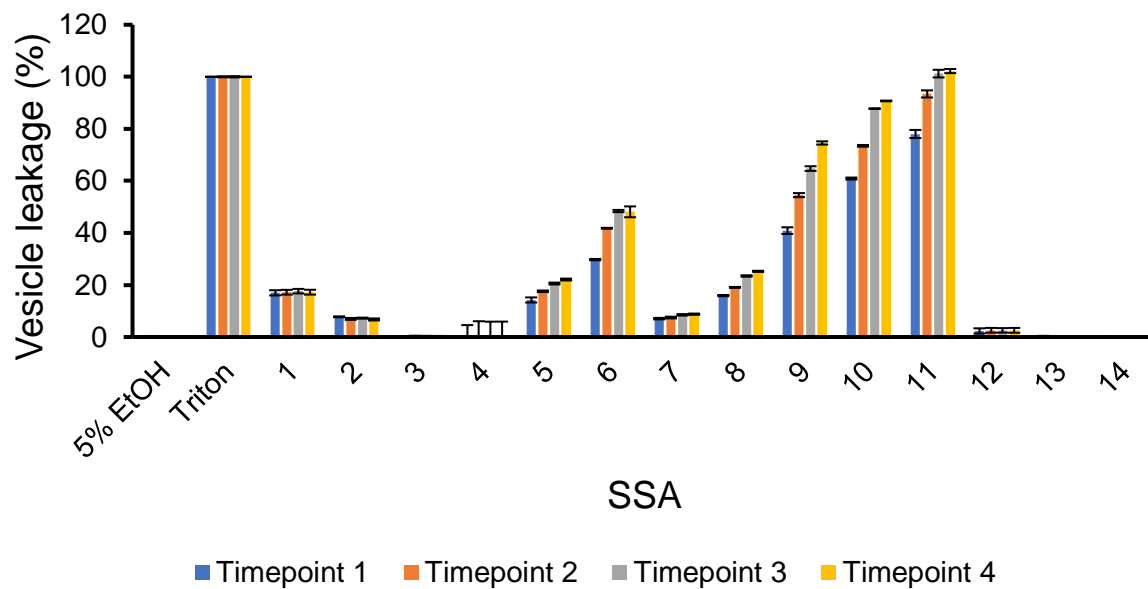

Figure S46 – The percentage lysis of *E. coli* polar lipid membranes ( $\lambda_{em} = 515$  nm) following the addition of a series of SSAs (1.5 mM). Time points 1-4 refer to 30 secs, 5 mins, 10 mins and 15 mins respectively. Triton X-100 (1%) was used as a positive control for 100 % cell lysis.

### PC lipid titrations

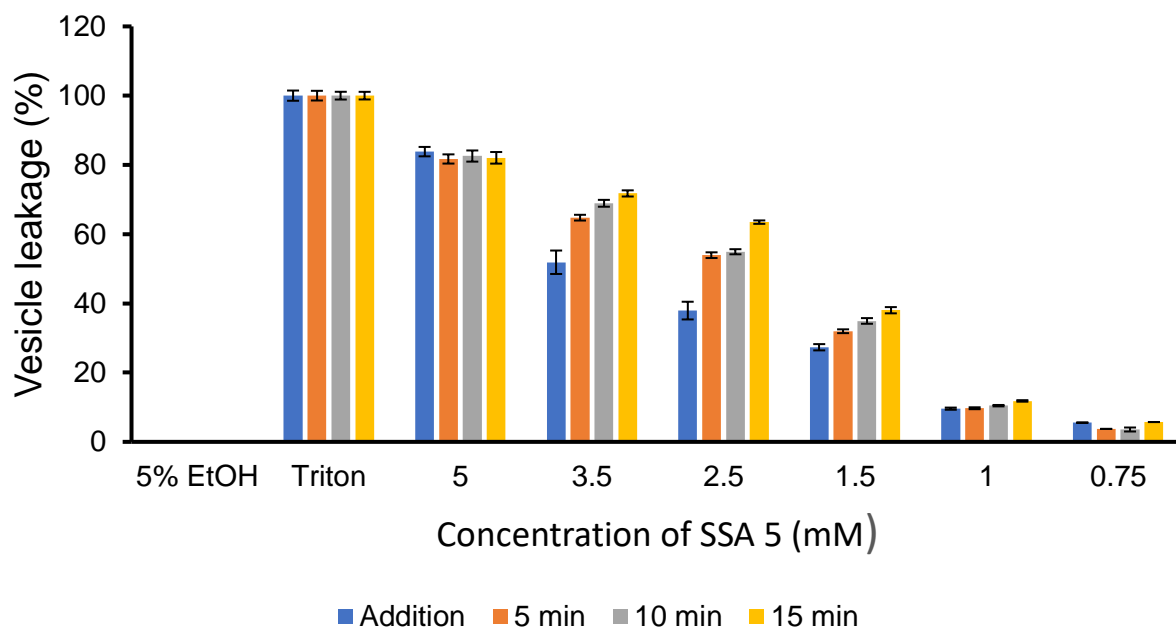

Figure S47 – The percentage lysis of PC lipid membranes ( $\lambda_{em} = 515$  nm) following the addition of SSA 5 at varying concentrations. Triton X-100 (1%) was used as a positive control for 100 % cell lysis.

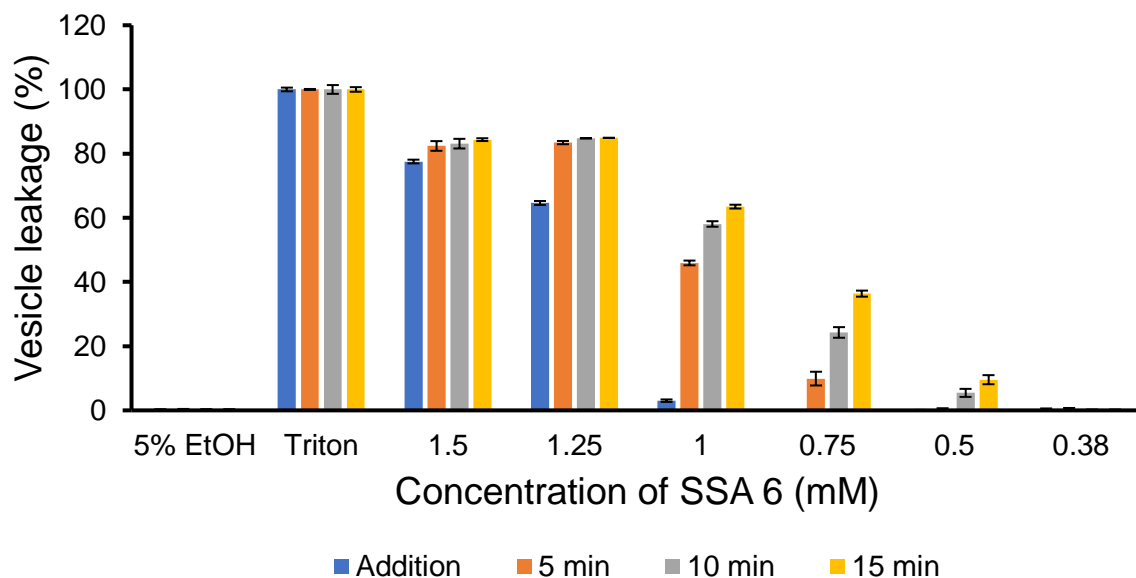

Figure S48 – The percentage lysis of PC lipid membranes ( $\lambda_{em} = 515$  nm) following the addition of SSA 6 at varying concentrations. Triton X-100 (1%) was used as a positive control for 100 % cell lysis.

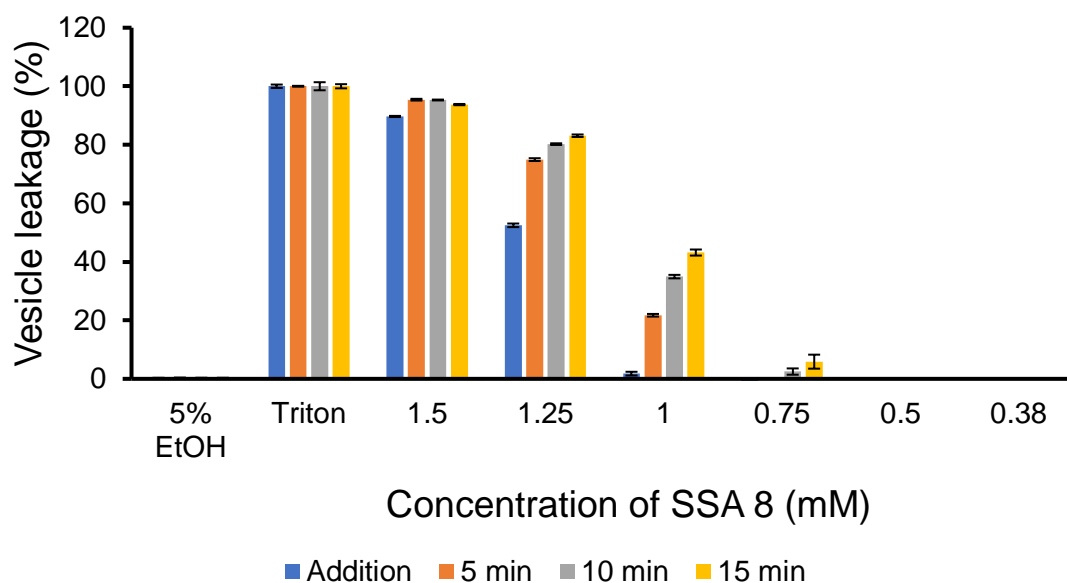

Figure S49 – The percentage lysis of PC lipid membranes (λ<sub>em</sub> = 515 nm) following the addition of SSA 8 at varying concentrations. Triton X-100 (1%) was used as a positive control for 100 % cell lysis.

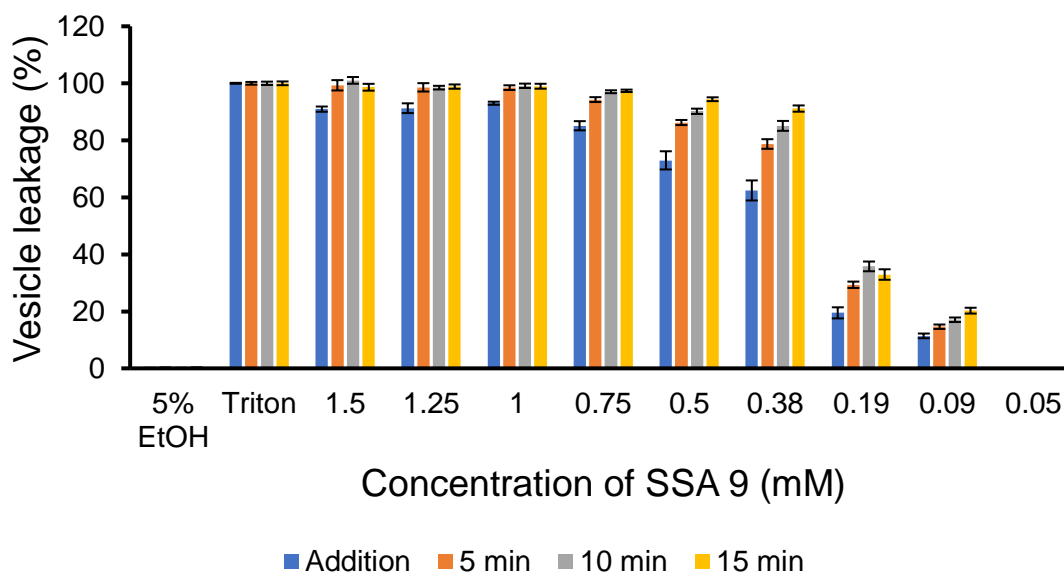

Figure S50 – The percentage lysis of PC lipid membranes (λ<sub>em</sub> = 515 nm) following the addition of SSA 9 at varying concentrations. Triton X-100 (1%) was used as a positive control for 100 % cell lysis.

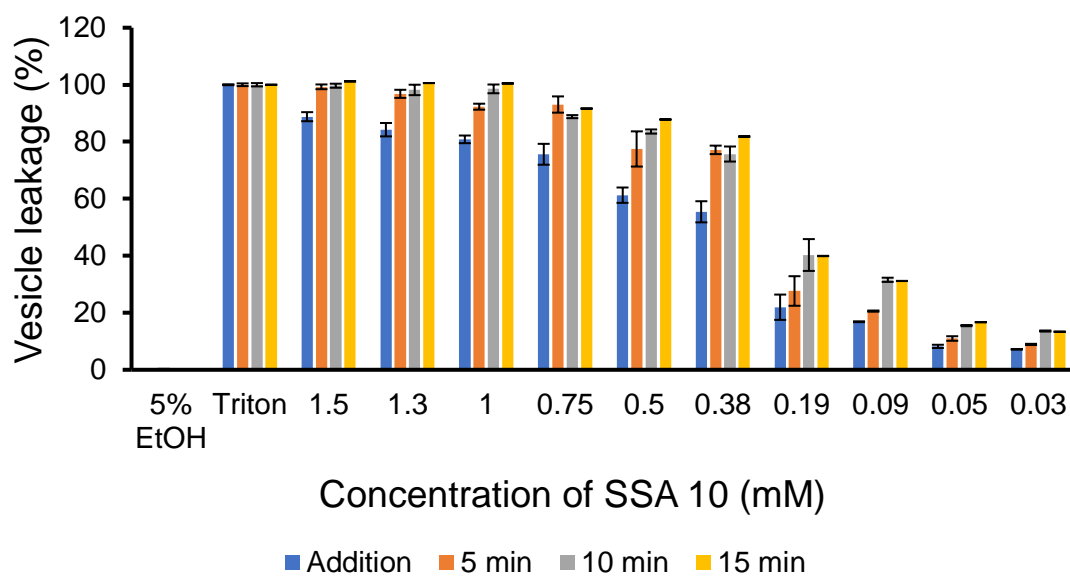

Figure S51 – The percentage lysis of PC lipid membranes ( $\lambda_{em} = 515$  nm) following the addition of SSA **10** at varying concentrations. Triton X-100 (1%) was used as a positive control for 100 % cell lysis.

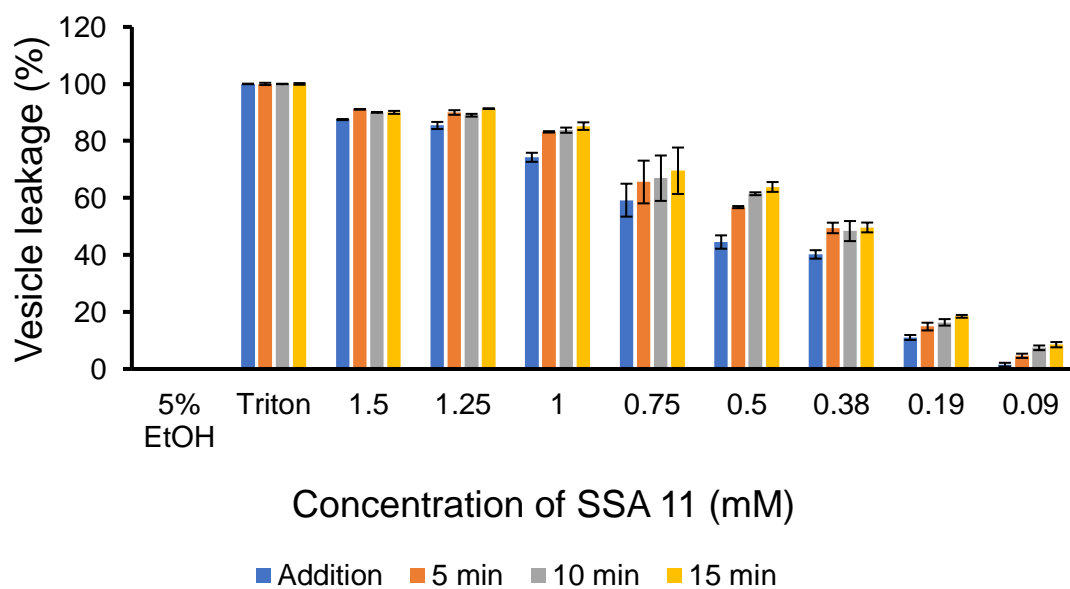

Figure S52 – The percentage lysis of PC lipid membranes ( $\lambda_{em} = 515$  nm) following the addition of SSA **11** at varying concentrations. Triton X-100 (1%) was used as a positive control for 100 % cell lysis.

### PG lipid titrations

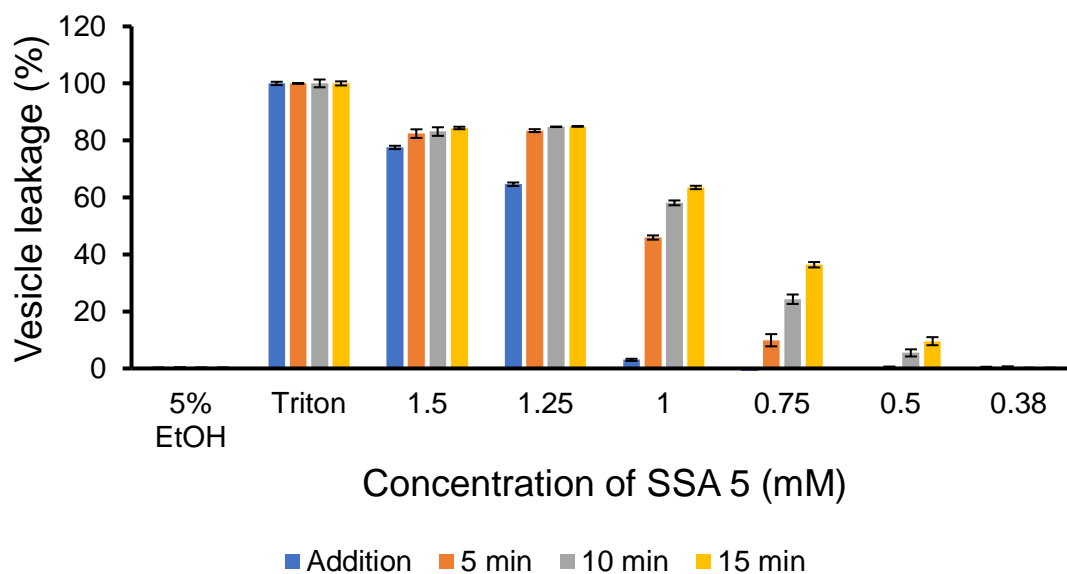

Figure S53 – The percentage lysis of PG lipid membranes ( $\lambda_{em} = 515$  nm) following the addition of SSA 5 at varying concentrations. Triton X-100 (1%) was used as a positive control for 100 % cell lysis.

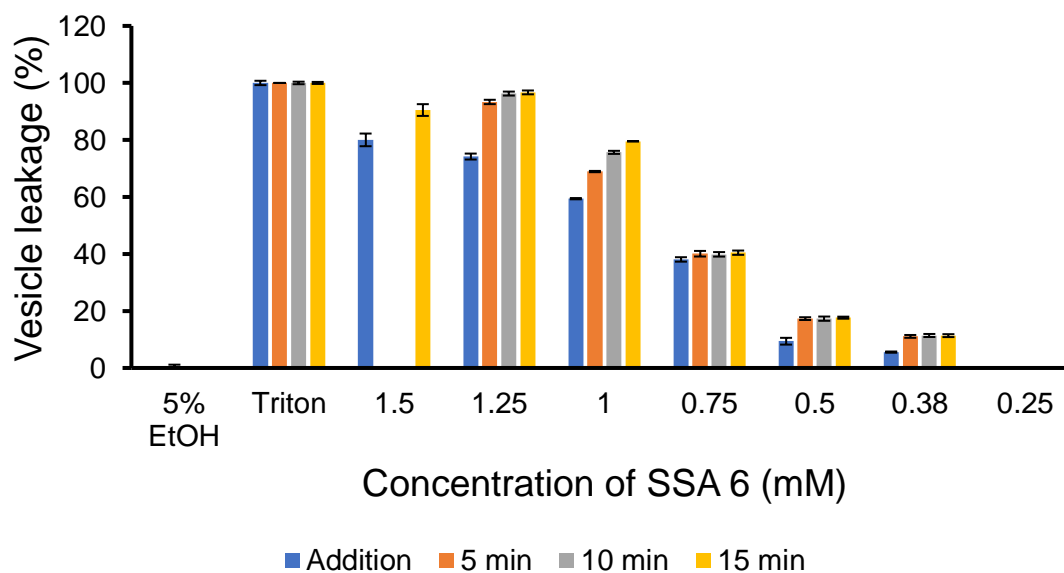

Figure S54 – The percentage lysis of PG lipid membranes ( $\lambda_{em} = 515$  nm) following the addition of SSA 6 at varying concentrations. Triton X-100 (1%) was used as a positive control for 100 % cell lysis.

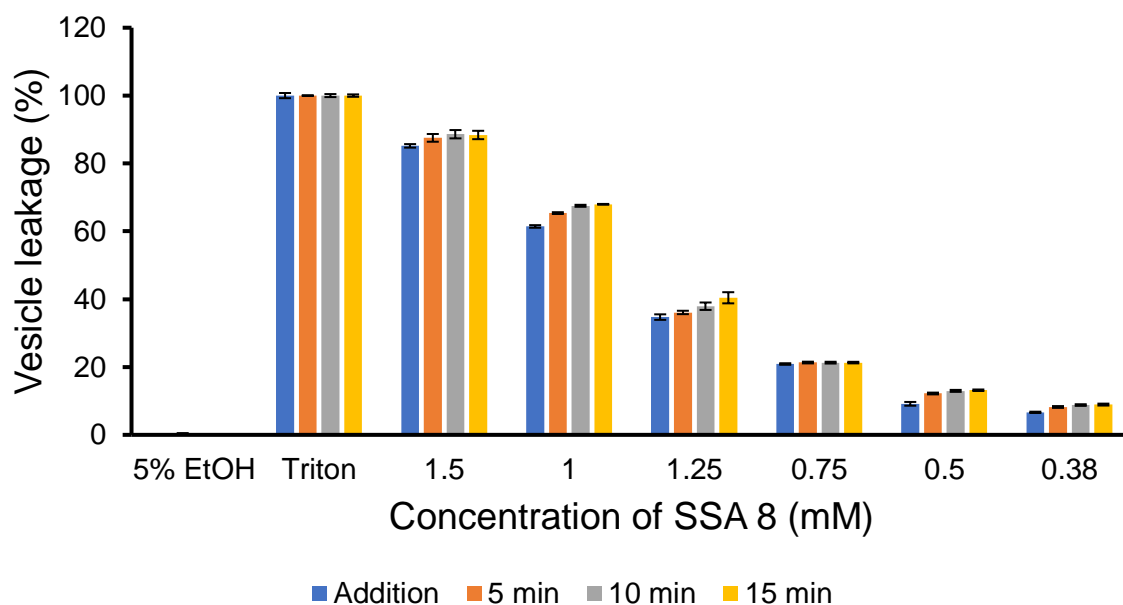

Figure S55 – The percentage lysis of PG lipid membranes ( $\lambda_{em} = 515$  nm) following the addition of SSA **8** at varying concentrations. Triton X-100 (1%) was used as a positive control for 100 % cell lysis.

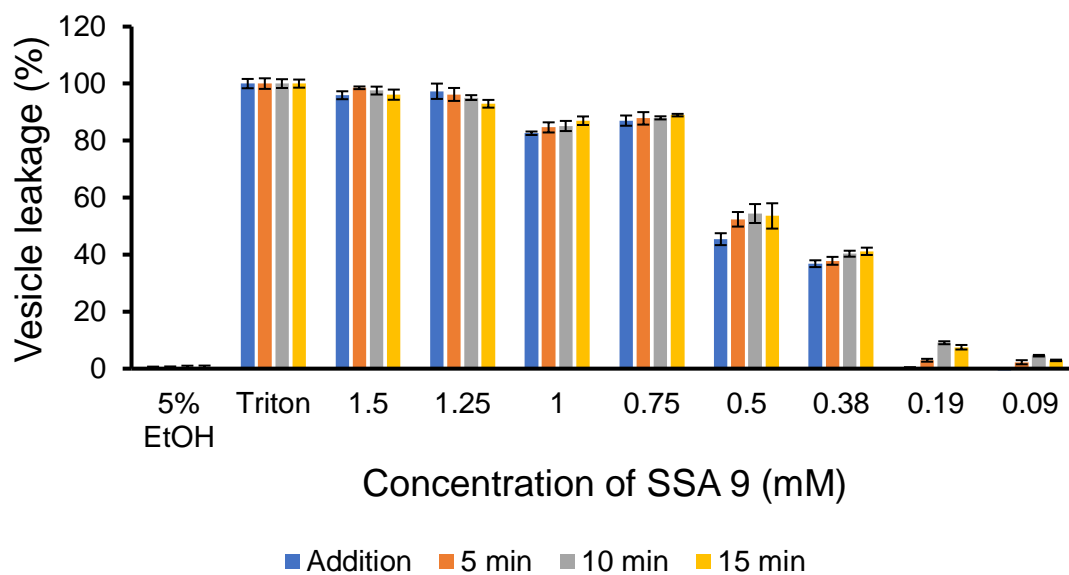

Figure S56 – The percentage lysis of PG lipid membranes ( $\lambda_{em} = 515$  nm) following the addition of SSA **9** at varying concentrations. Triton X-100 (1%) was used as a positive control for 100 % cell lysis.

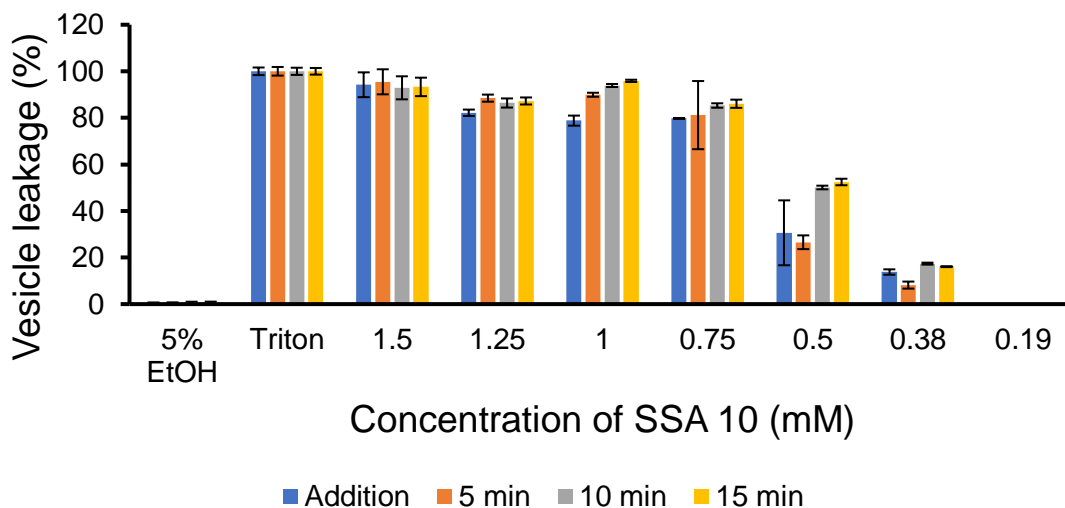

Figure S57 – The percentage lysis of PG lipid membranes ( $\lambda_{em} = 515$  nm) following the addition of SSA **10** at varying concentrations. Triton X-100 (1%) was used as a positive control for 100 % cell lysis.

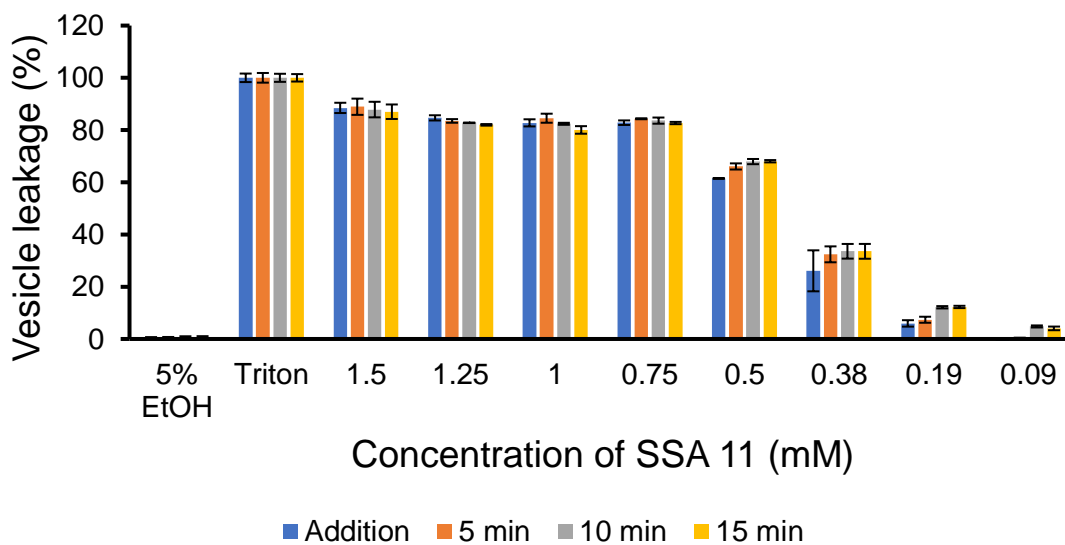

Figure S58 – The percentage lysis of PG lipid membranes ( $\lambda_{em} = 515$  nm) following the addition of SSA **11** at varying concentrations. Triton X-100 (1%) was used as a positive control for 100 % cell lysis.

PE:PG 3:1 lipid titrations

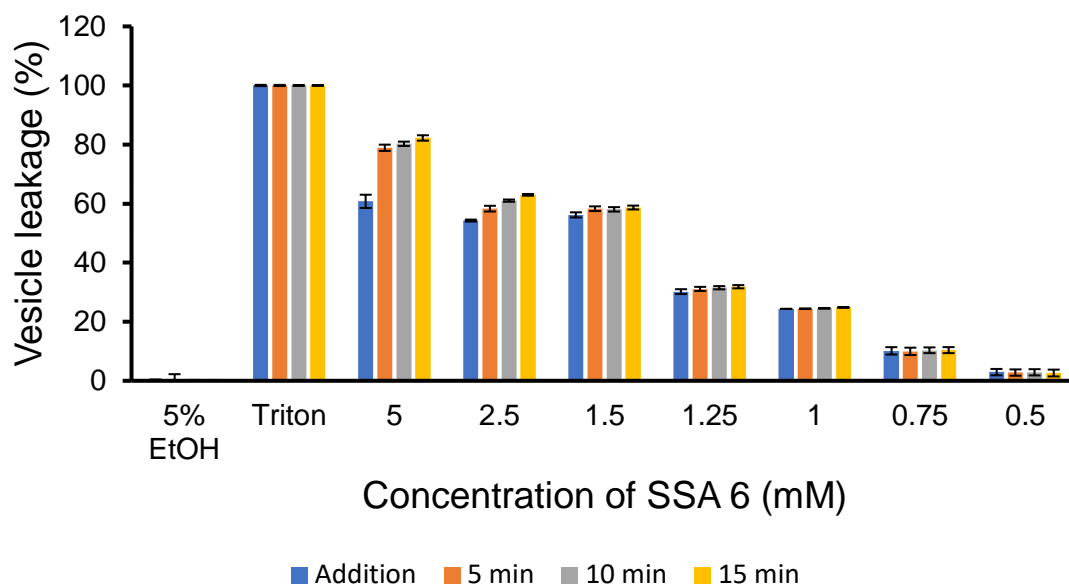

Figure S59 – The percentage lysis of PE:PG 3:1 lipid membranes ( $\lambda_{em} = 515$  nm) following the addition of SSA 6 at varying concentrations. Triton X-100 (1%) was used as a positive control for 100 % cell lysis.

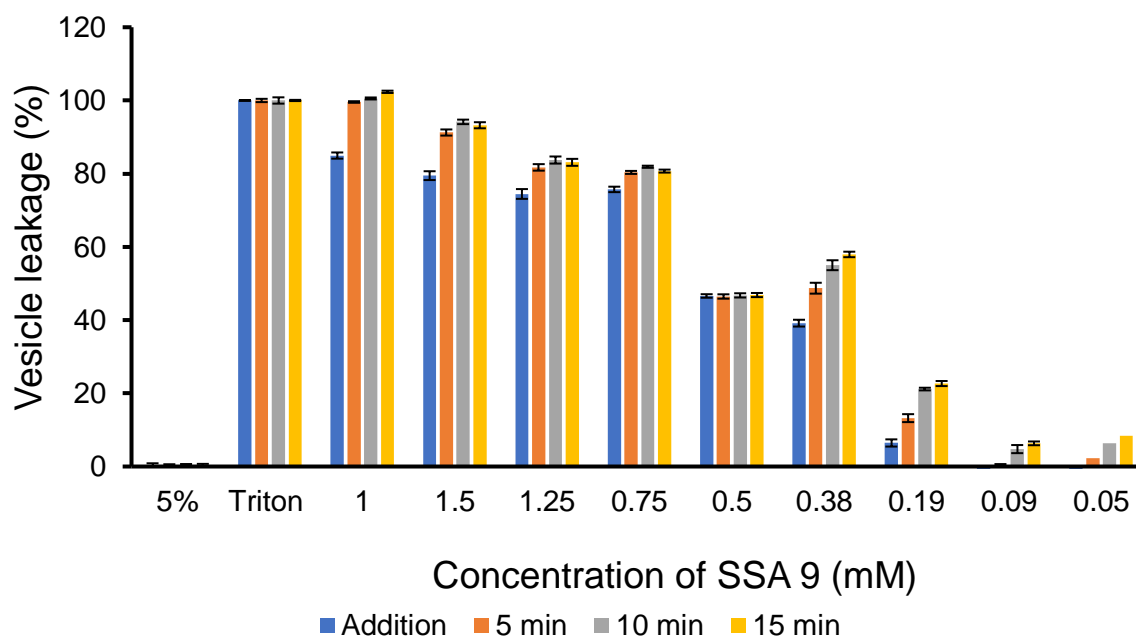

Figure S60 – The percentage lysis of PE:PG 3:1 lipid membranes ( $\lambda_{em} = 515$  nm) following the addition of SSA 9 at varying concentrations. Triton X-100 (1%) was used as a positive control for 100 % cell lysis.



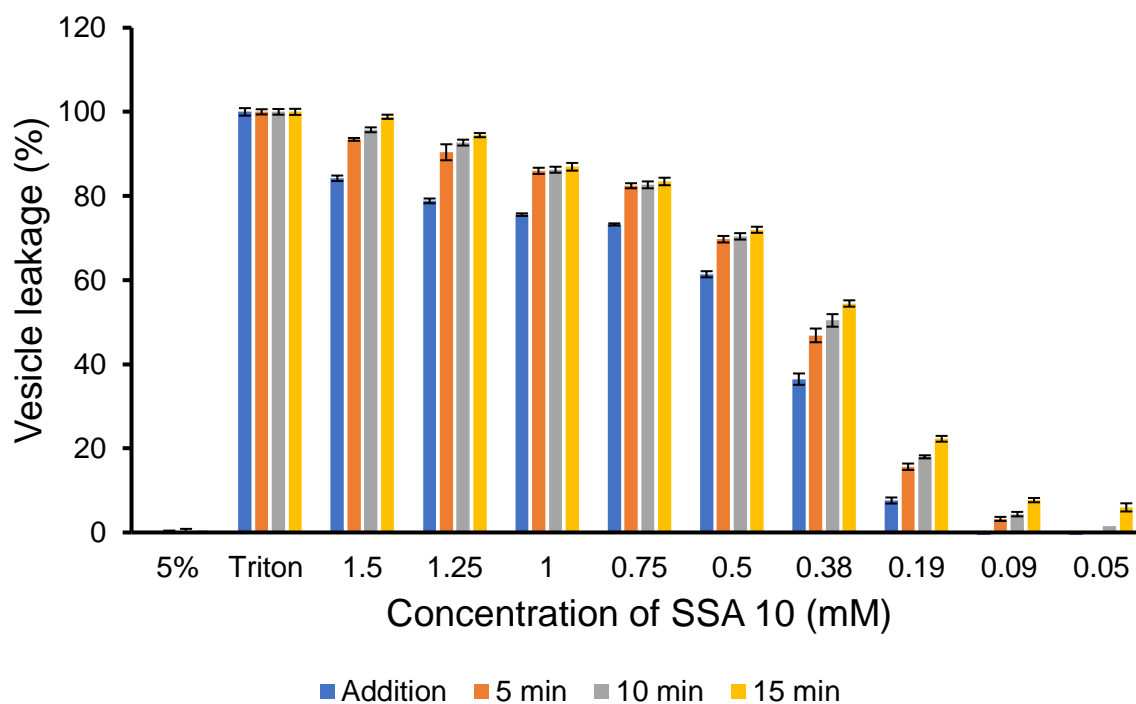

Figure S61 – The percentage lysis of PE:PG 3:1 lipid membranes ( $\lambda_{em} = 515$  nm) following the addition of SSA **10** at varying concentrations. Triton X-100 (1%) was used as a positive control for 100 % cell lysis.

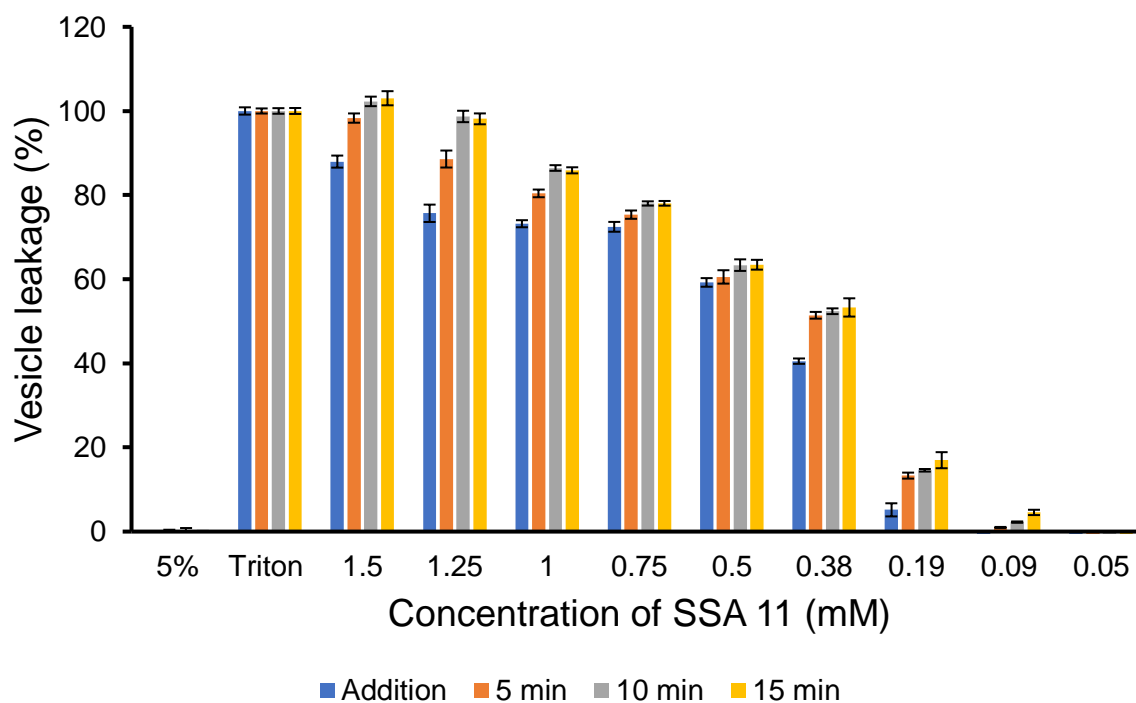

Figure S62 – The percentage lysis of PE:PG 3:1 lipid membranes ( $\lambda_{em} = 515$  nm) following the addition of SSA **11** at varying concentrations. Triton X-100 (1%) was used as a positive control for 100 % cell lysis.

*E. coli* total lipid titrations

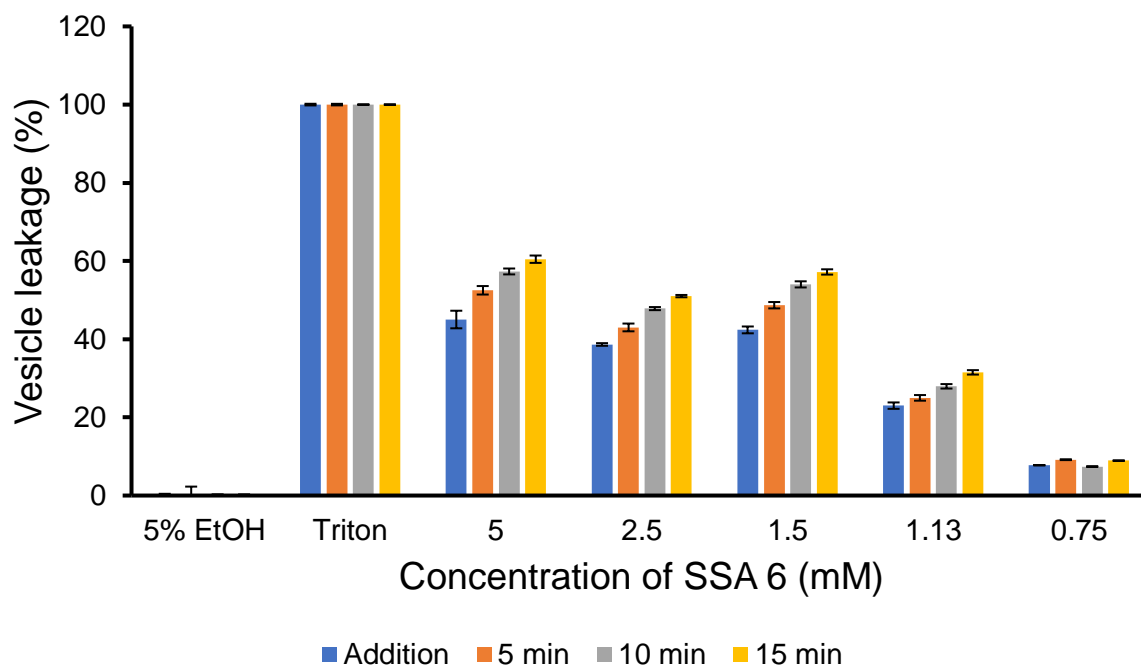

Figure S63 – The percentage lysis of *E. coli* total lipid membranes ( $\lambda_{em} = 515$  nm) following the addition of SSA 6 at varying concentrations. Triton X-100 (1%) was used as a positive control for 100 % cell lysis.

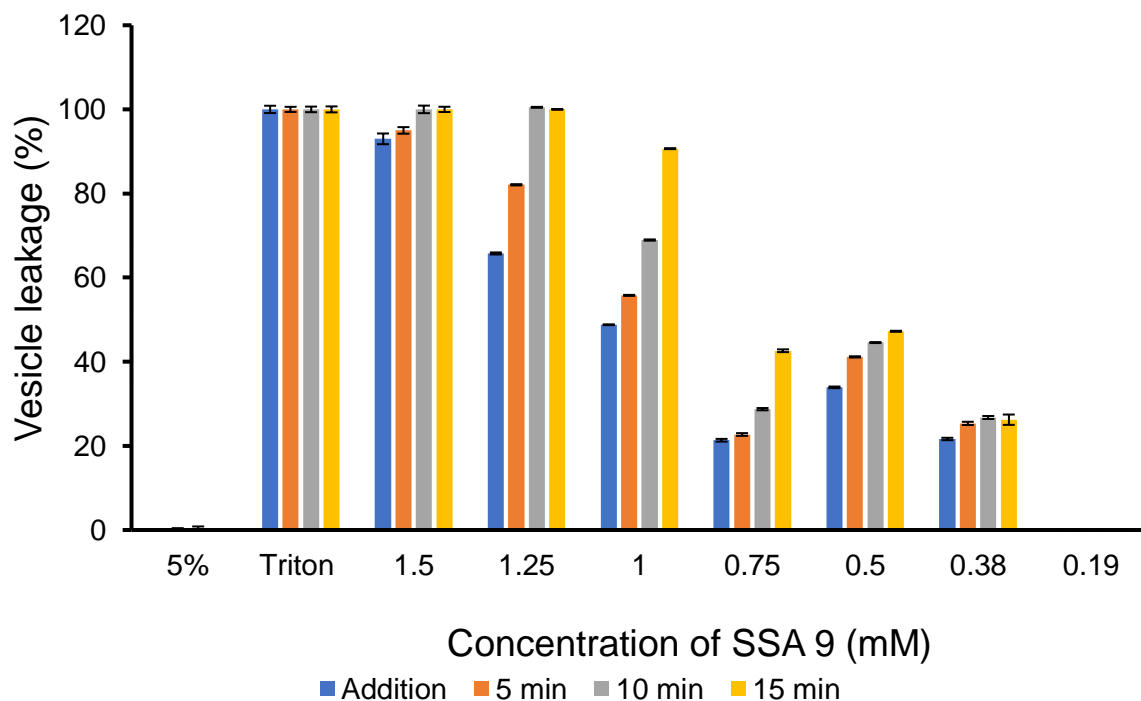

Figure S64 – The percentage lysis of *E. coli* total lipid membranes ( $\lambda_{em} = 515$  nm) following the addition of SSA 9 at varying concentrations. Triton X-100 (1%) was used as a positive control for 100 % cell lysis.

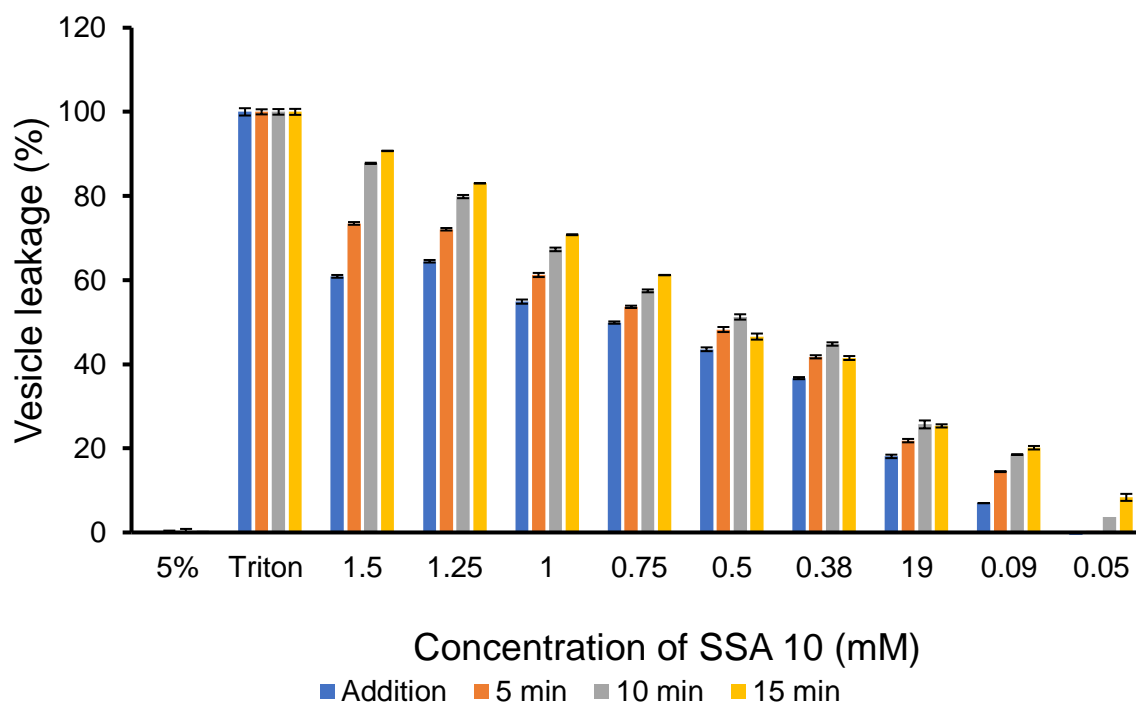

Figure S65 – The percentage lysis of *E. coli* total lipid membranes ( $\lambda_{em} = 515$  nm) following the addition of SSA **10** at varying concentrations. Triton X-100 (1%) was used as a positive control for 100 % cell lysis.

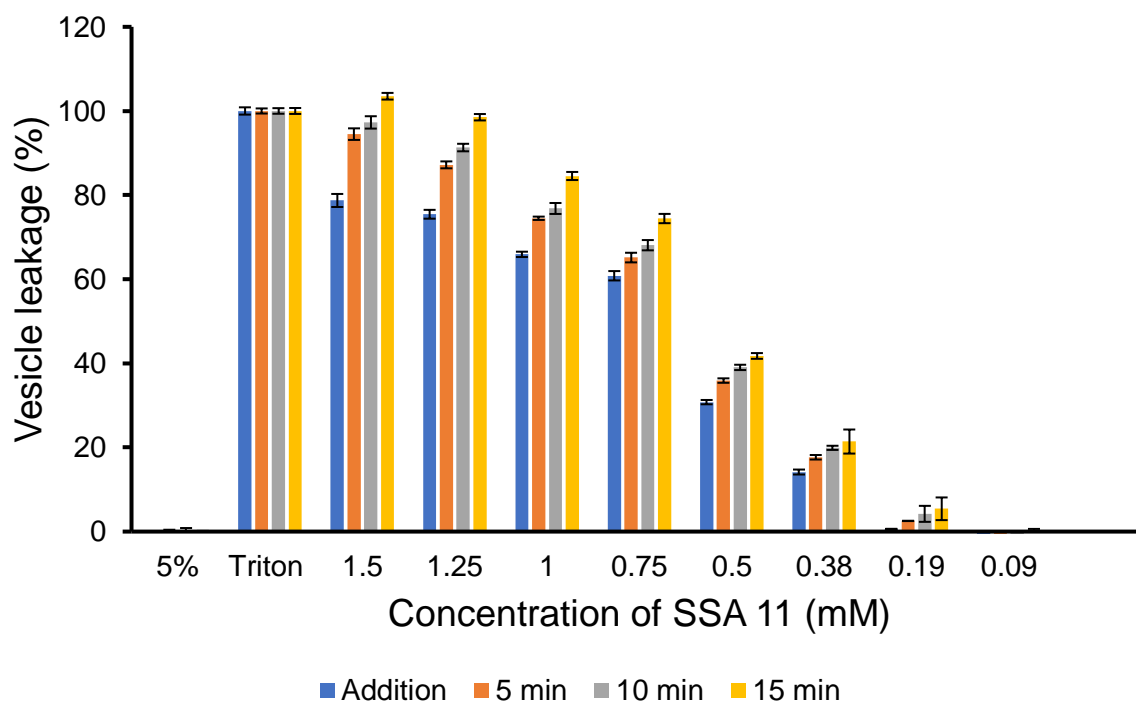

Figure S66 – The percentage lysis of *E. coli* total lipid membranes ( $\lambda_{em} = 515$  nm) following the addition of SSA **11** at varying concentrations. Triton X-100 (1%) was used as a positive control for 100 % cell lysis.

*E. coli* polar lipid titrations

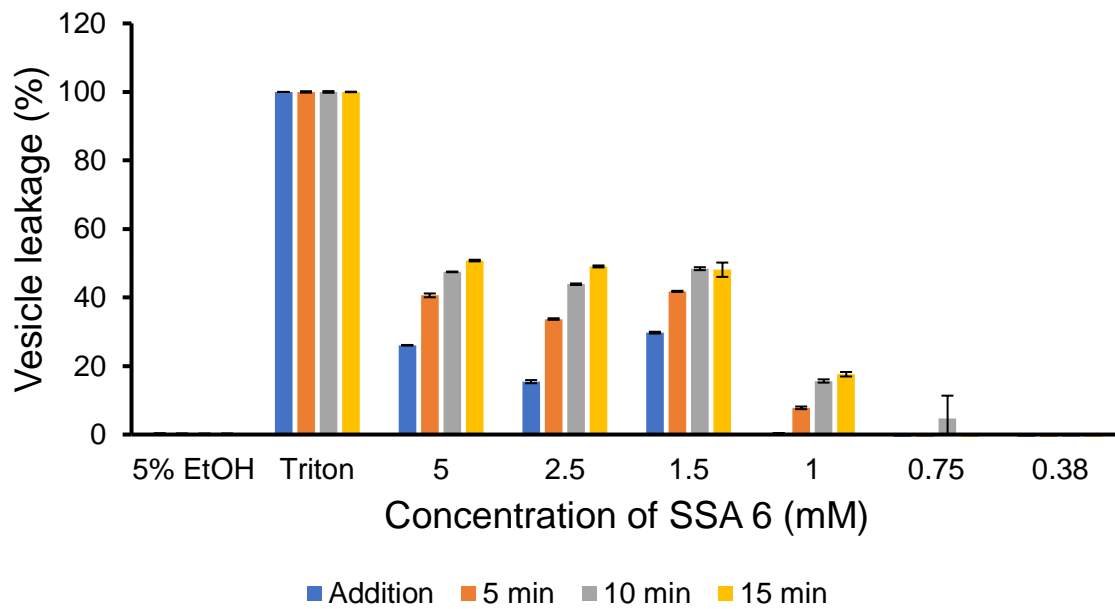

Figure S67 – The percentage lysis of *E. coli* polar lipid membranes ( $\lambda_{em} = 515$  nm) following the addition of SSA 6 at varying concentrations. Triton X-100 (1%) was used as a positive control for 100 % cell lysis.

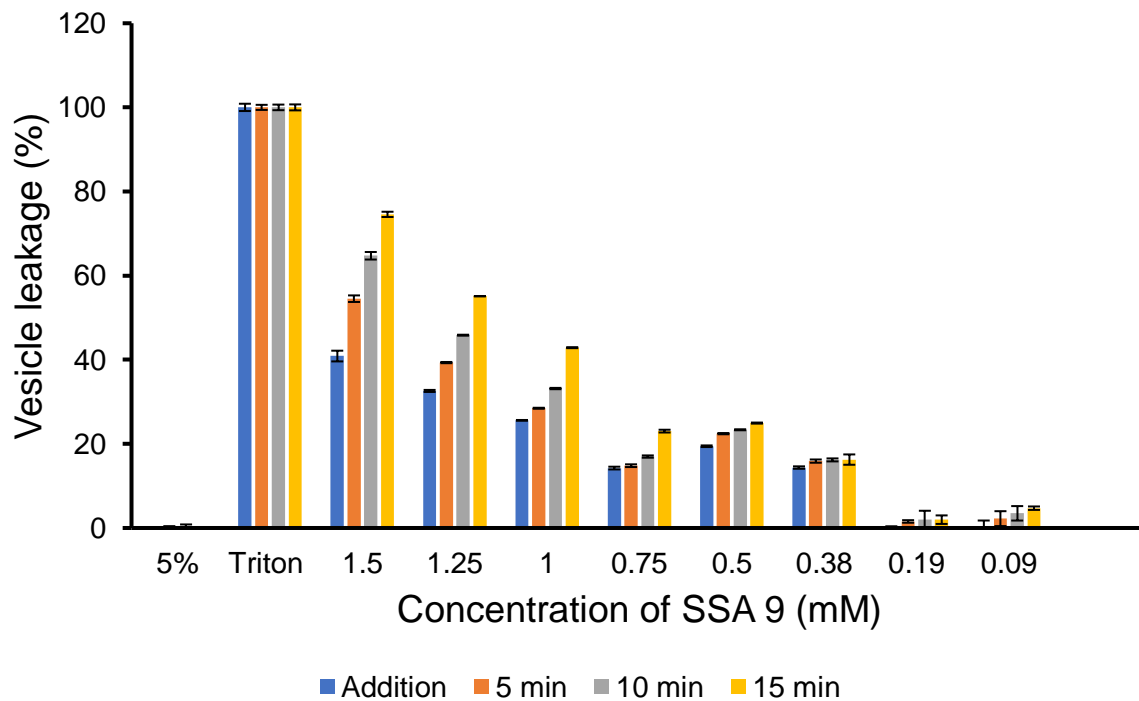

Figure S68 – The percentage lysis of *E. coli* polar lipid membranes ( $\lambda_{em} = 515$  nm) following the addition of SSA 9 at varying concentrations. Triton X-100 (1 %) was used as a positive control for 100 % cell lysis.

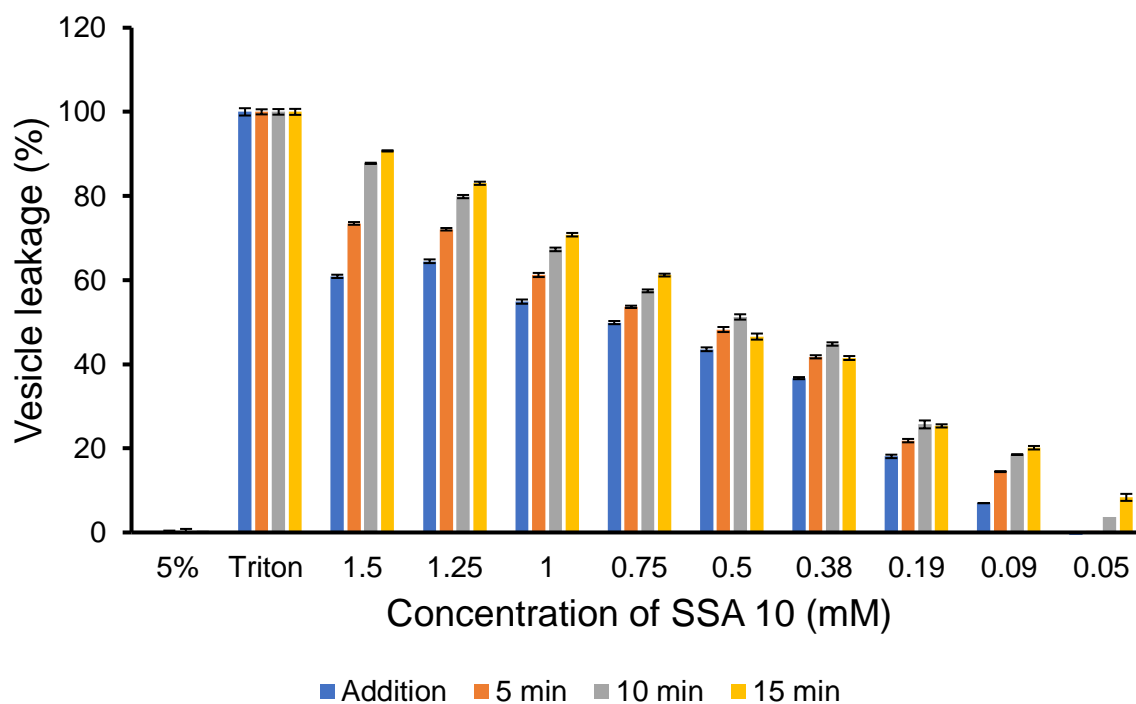

Figure S69 – The percentage lysis of *E. coli* polar lipid membranes ( $\lambda_{em} = 515$  nm) following the addition of SSA **10** at varying concentrations. Triton X-100 (1 %) was used as a positive control for 100 % cell lysis.

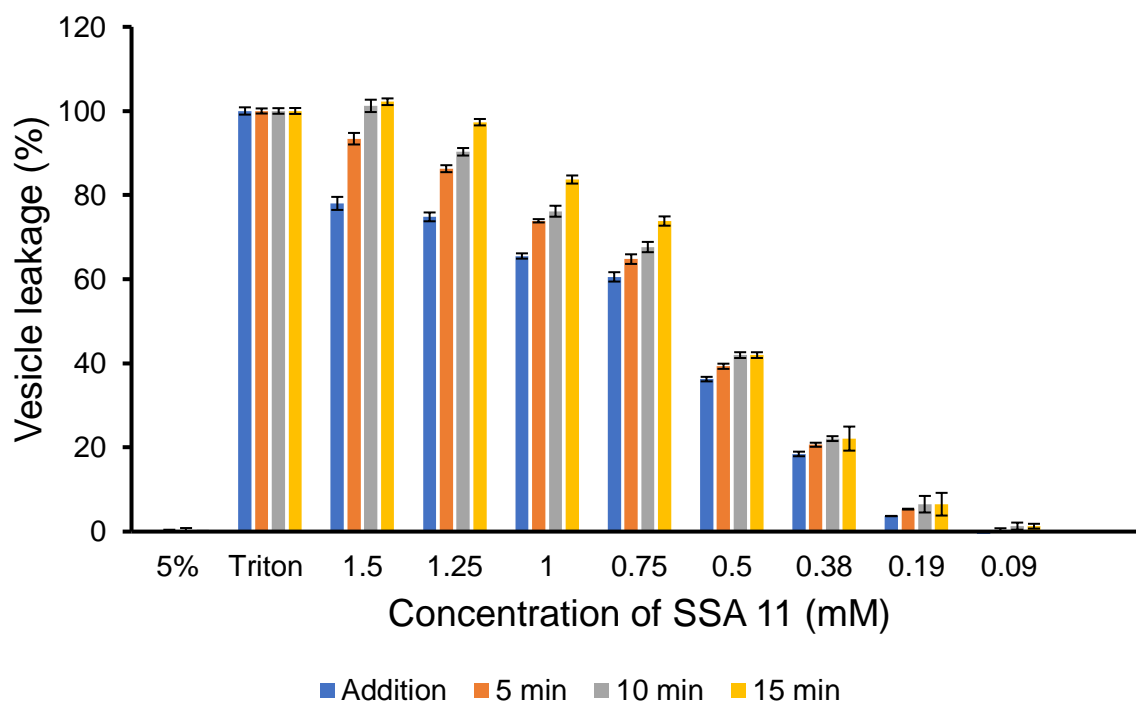

Figure S70 – The percentage lysis of *E. coli* polar lipid membranes ( $\lambda_{em} = 515$  nm) following the addition of SSA **11** at varying concentrations. Triton X-100 (1 %) was used as a positive control for 100 % cell lysis.

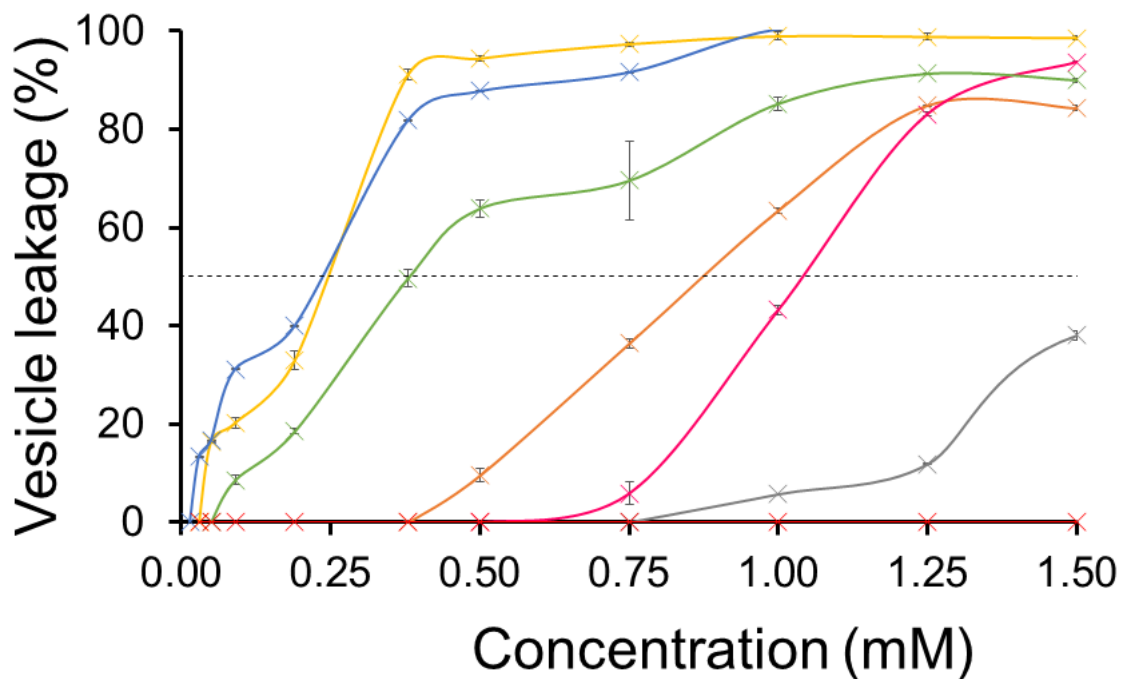

Figure S71 - The percentage lysis of PC lipid membranes (30  $\mu$ M) following addition of SSA 5 (grey), SSA 6 (orange), SSA 8 (pink), SSA 9 (yellow), SSA 10 (blue), SSA 11 (green) and control solution 5 % EtOH (red) after 15 mins.

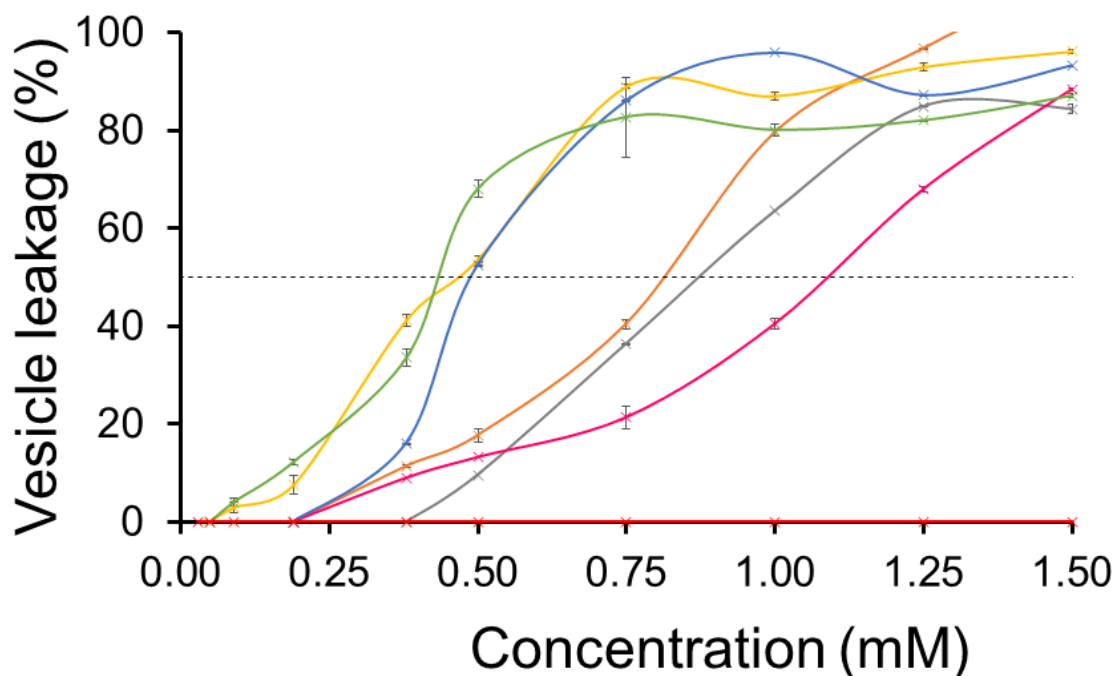

Figure S72 - The percentage lysis of PG lipid membranes (30  $\mu$ M) following addition of SSA 5 (grey), SSA 6 (orange), SSA 8 (pink), SSA 9 (yellow), SSA 10 (blue), SSA 11 (green) and control solution 5 % EtOH (red) after 15 mins.

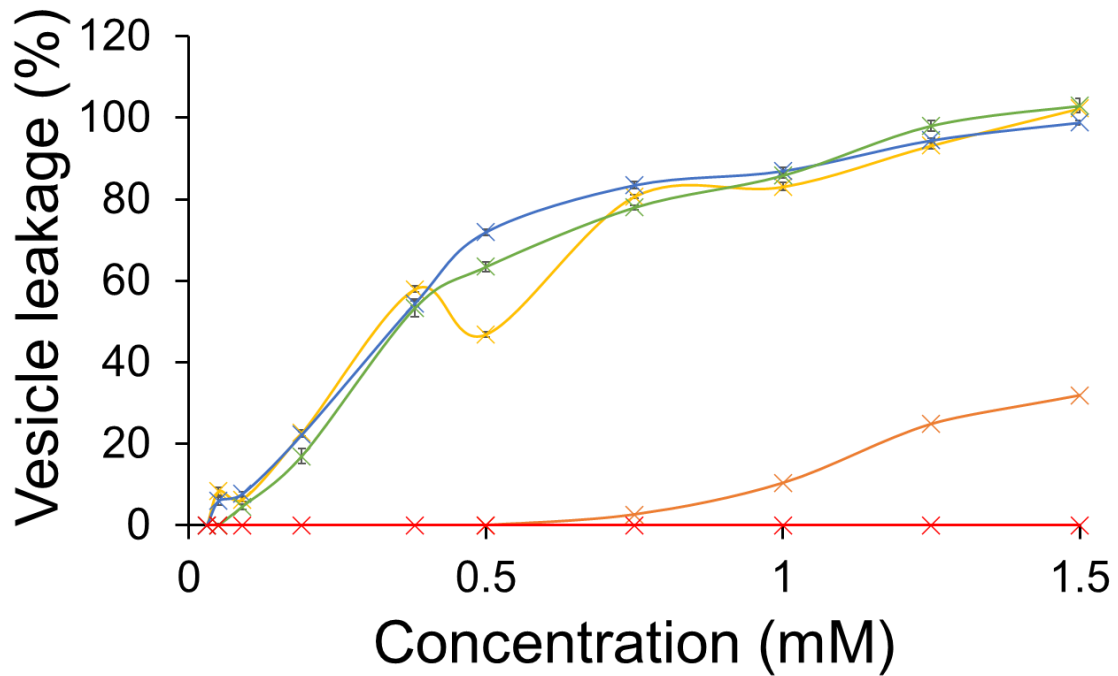

Figure S73 - The percentage lysis of PE-PG mix lipid membranes (30  $\mu$ M) following addition of SSA 5 (grey), SSA 6 (orange), SSA 8 (pink), SSA 9 (yellow), SSA 10 (blue), SSA 11 (green) and control solution 5 % EtOH (red) after 15 mins.

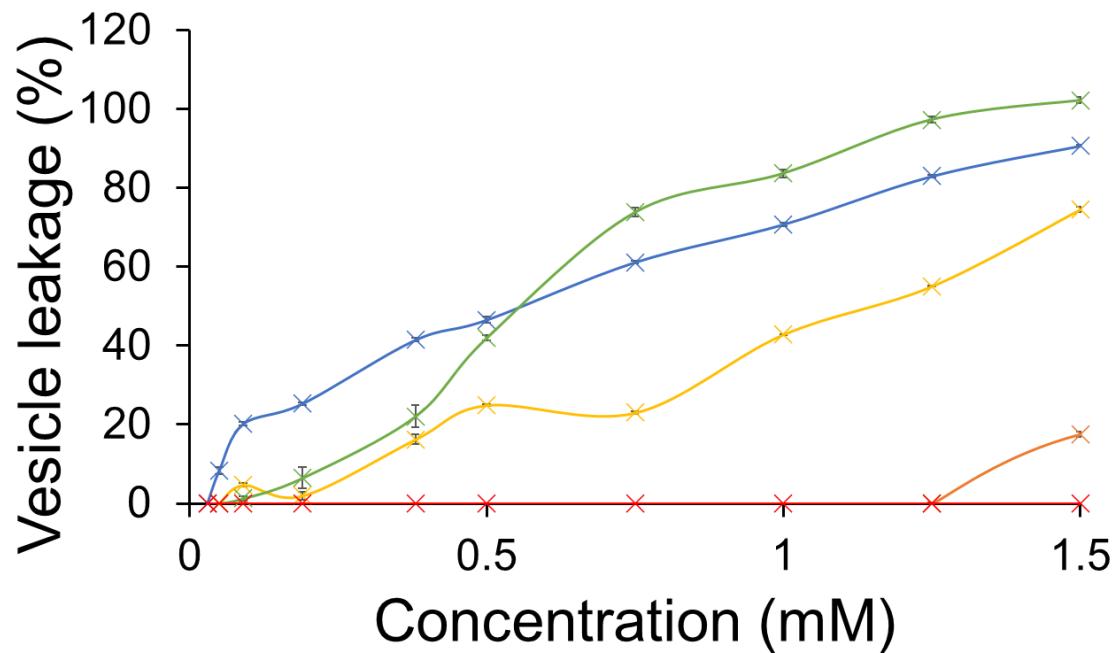

Figure S74 - The percentage lysis of E. coli polar mix lipid membranes (30  $\mu$ M) following addition of SSA 5 (grey), SSA 6 (orange), SSA 8 (pink), SSA 9 (yellow), SSA 10 (blue), SSA 11 (green) and control solution 5 % EtOH (red) after 15 mins.

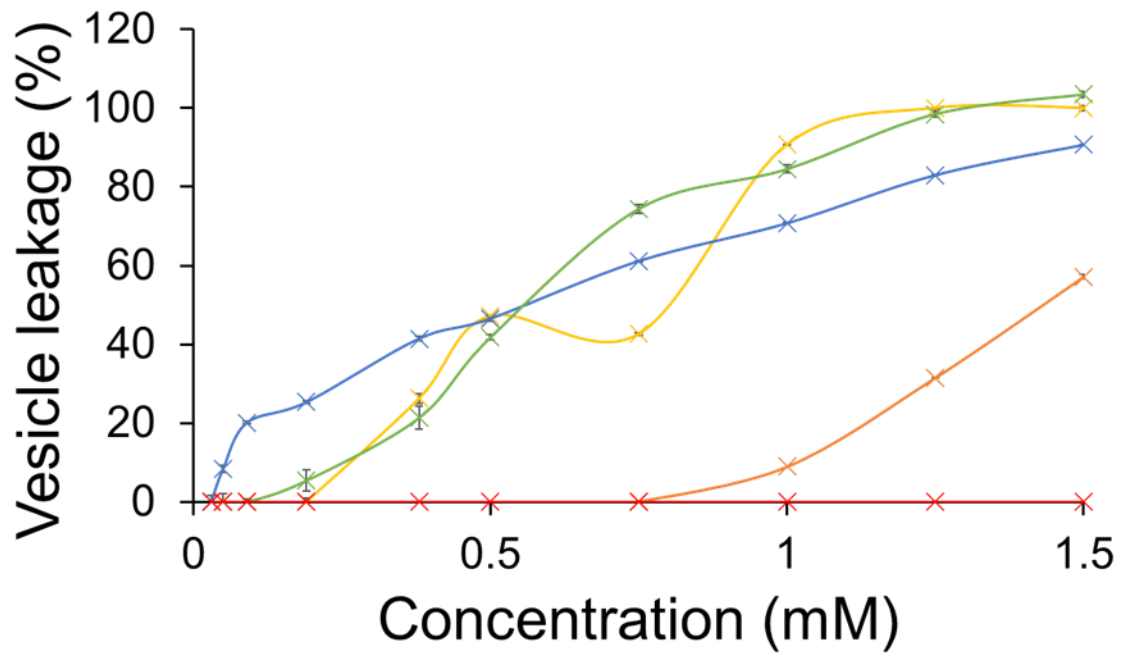

Figure S75 - The percentage lysis of *E. coli* total mix lipid membranes (30  $\mu$ M) following addition of SSA 5 (grey), SSA 6 (orange), SSA 8 (pink), SSA 9 (yellow), SSA 10 (blue), SSA 11 (green) and control solution 5 % EtOH (red) after 15 mins.



## Section 11: Membrane Fluidity Assay Data

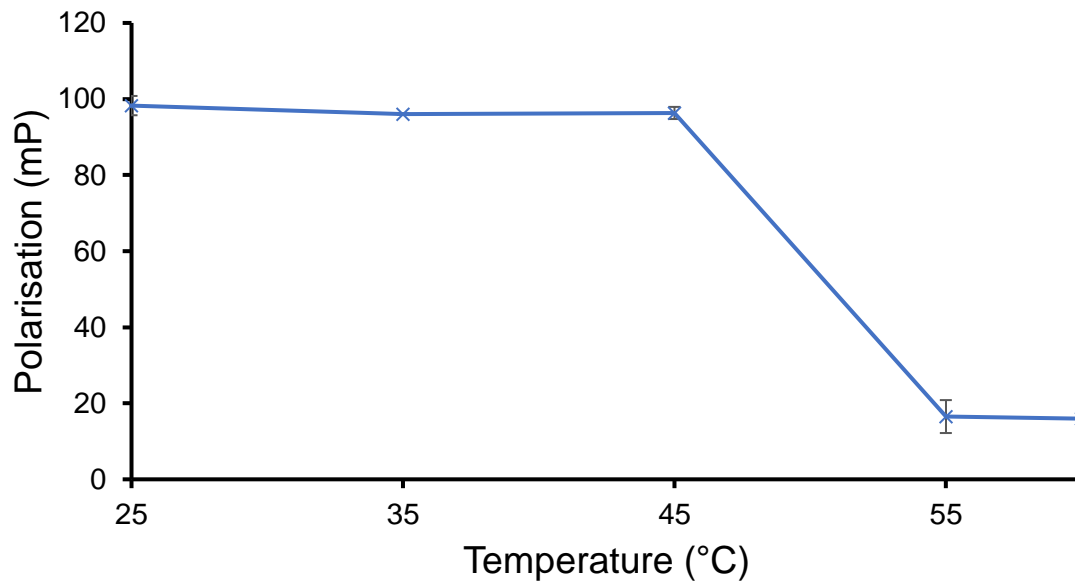

Figure S76 – Effect of temperature on FP measurements in DPH-labelled DSPG vesicles. A target FP value of 100 mP was set to the DPH-labelled vesicles at 25 °C.

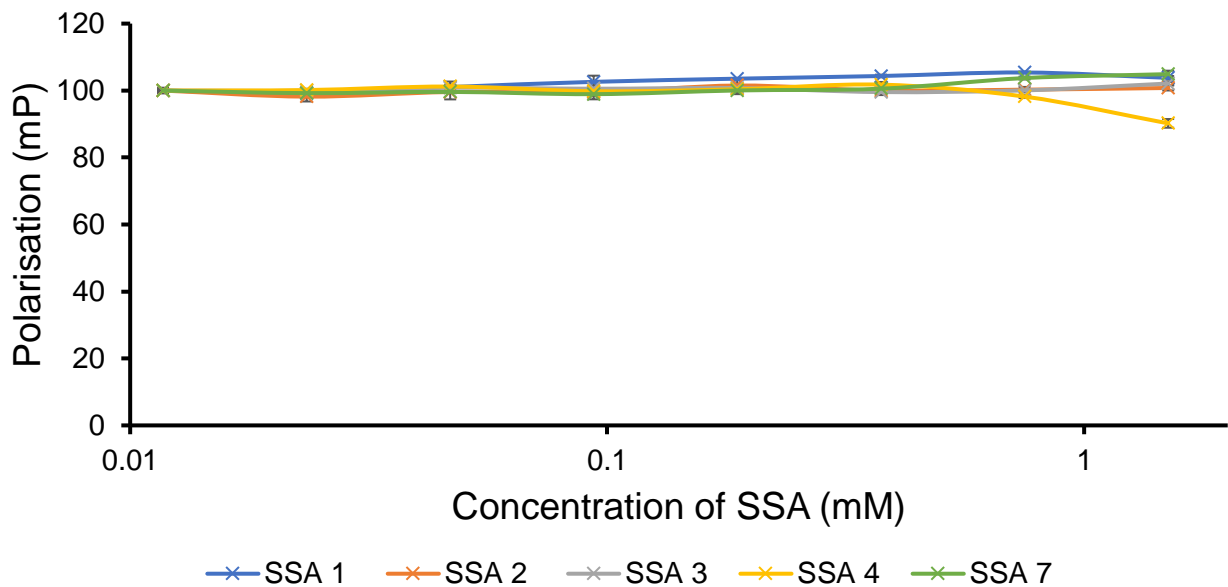

Figure S77 – Effect of SSA on FP measured in DPH-labelled PC vesicles at 25 °C. A target FP value of 100 mP was set to the DPH-labelled vesicles.

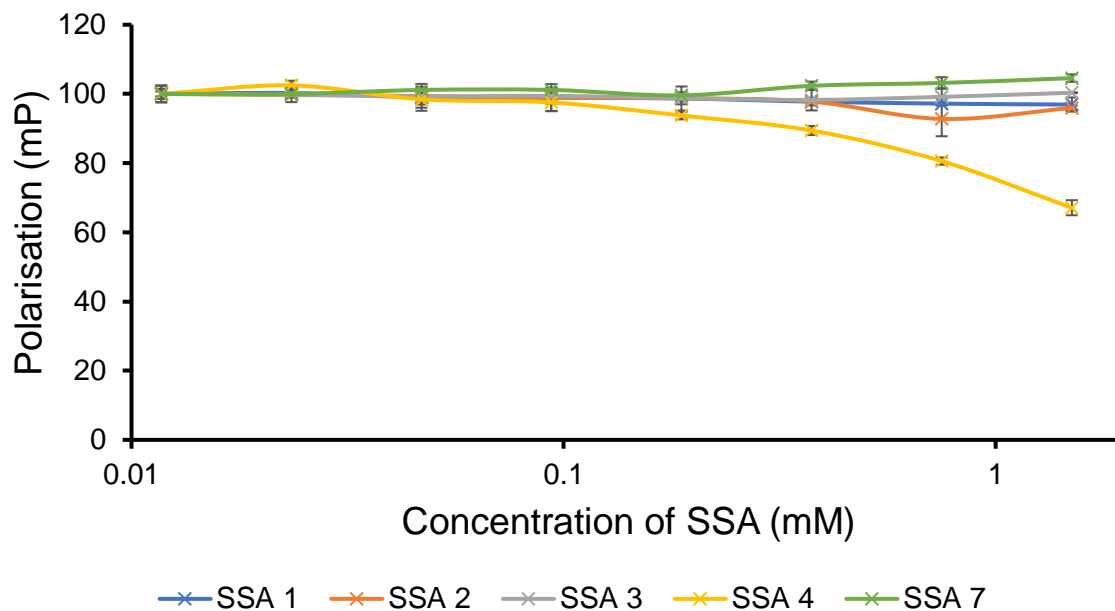

Figure S78 – Effect of SSA on FP measured in DPH-labelled PG vesicles at 25 °C. A target FP value of 100 mP was set to the DPH-labelled vesicles.

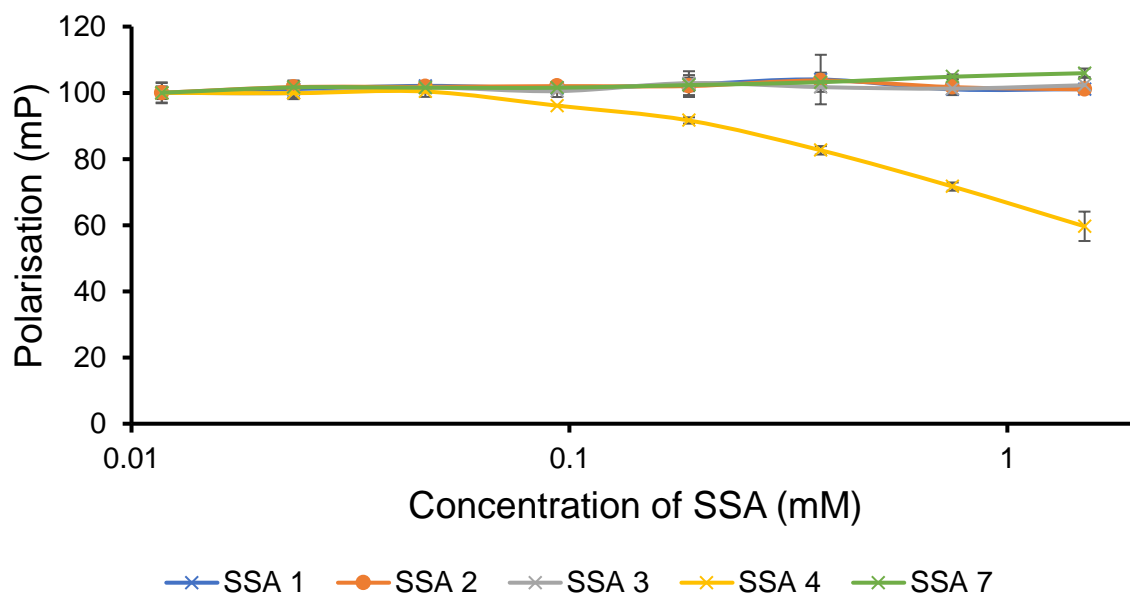

Figure S79 – Effect of SSA on FP measured in DPH-labelled PE:PG 3:1 vesicles at 25 °C. A target FP value of 100 mP was set to the DPH-labelled vesicles.

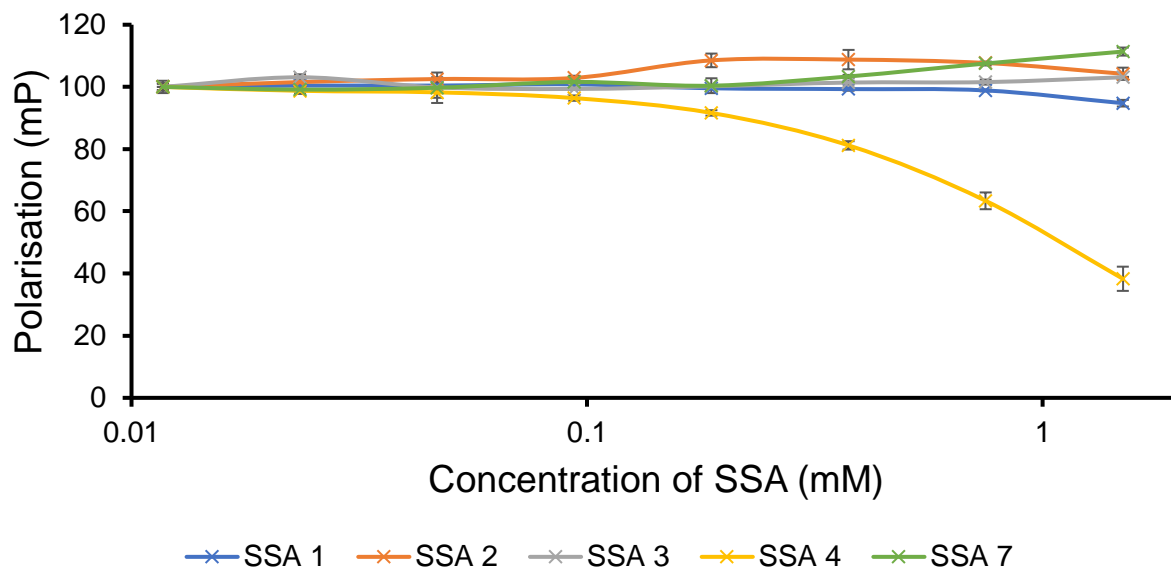

Figure S80 – Effect of SSA on FP measured in DPH-labelled *E. coli* total vesicles at 25 °C. A target FP value of 100 mP was set to the DPH-labelled vesicles.

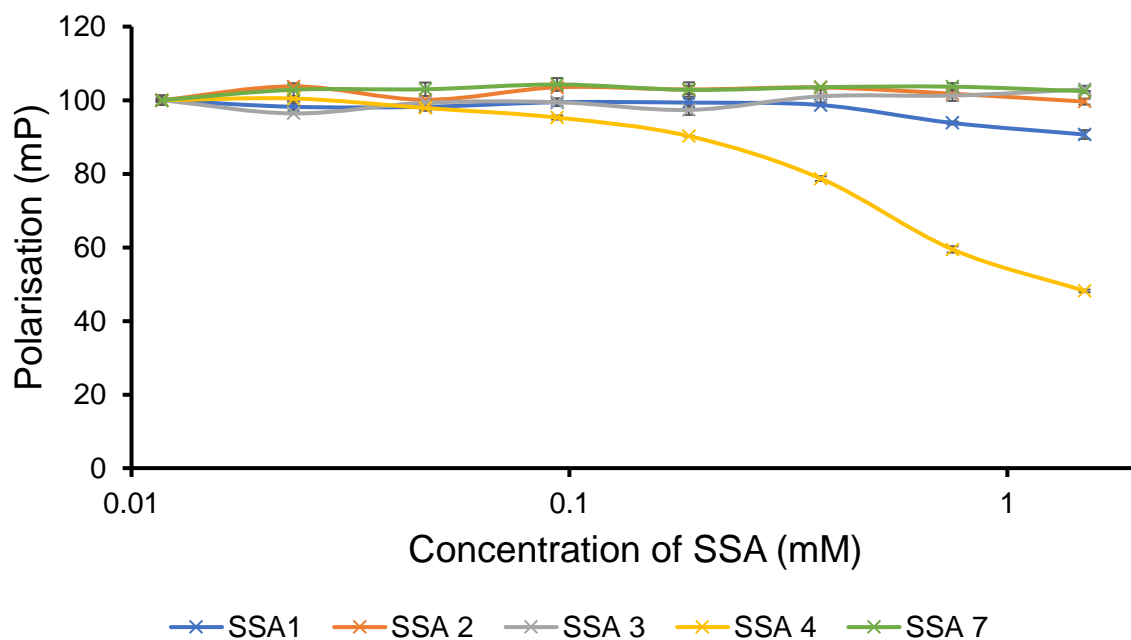

Figure S81 – Effect of SSA on FP measured in DPH-labelled *E. coli* polar vesicles at 25 °C. A target FP value of 100 mP was set to the DPH-labelled vesicles.

## Section 12: Fluorescence Polarisation Adhesion Assay Data

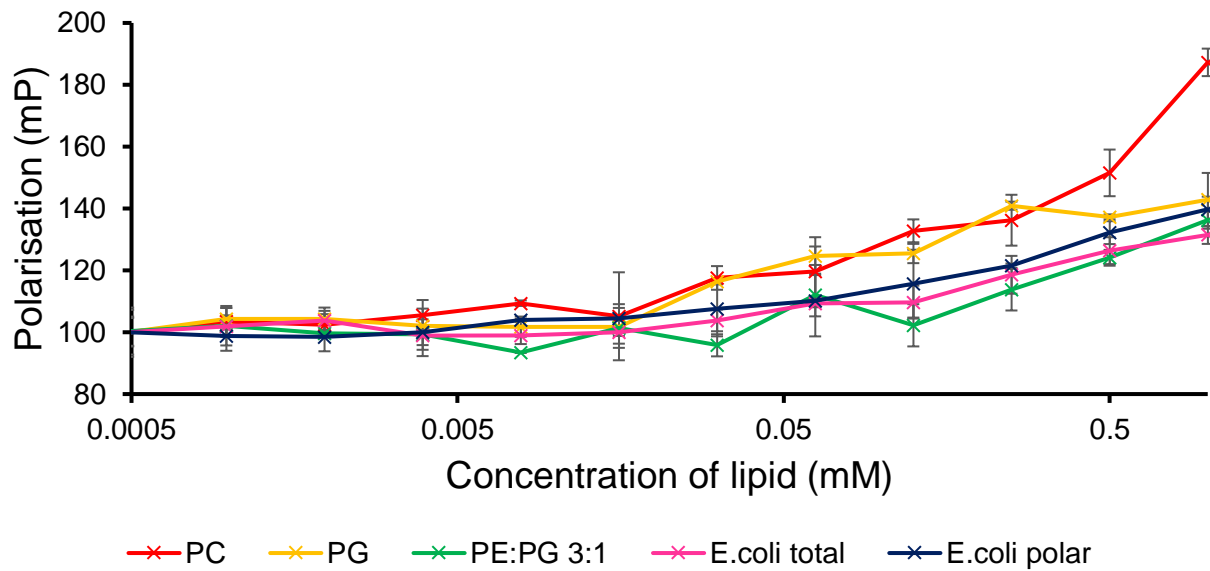

Figure S82 – Effect of fluorescent SSA 5 (0.15 mM) on FP measured in synthetic vesicles at 25 °C. A target FP value of 100 mP was set to fluorescent SSA 5 alone.

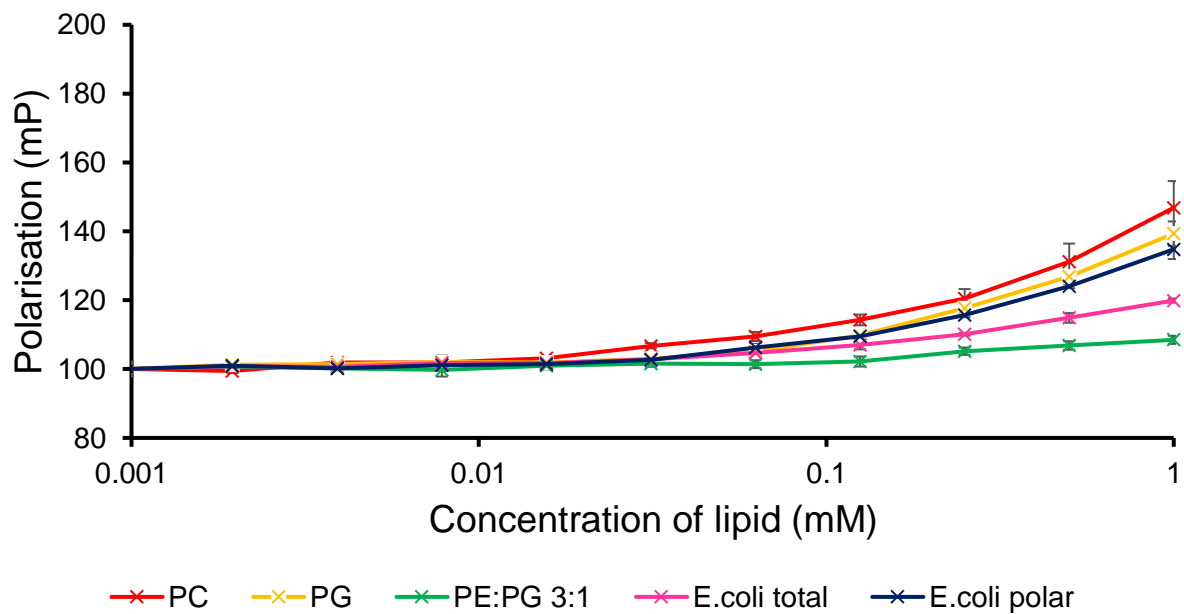

Figure S83 – Effect of fluorescent SSA 6 (0.15 mM) on FP measured in synthetic vesicles at 25 °C. A target FP value of 100 mP was set to fluorescent SSA 6 alone.

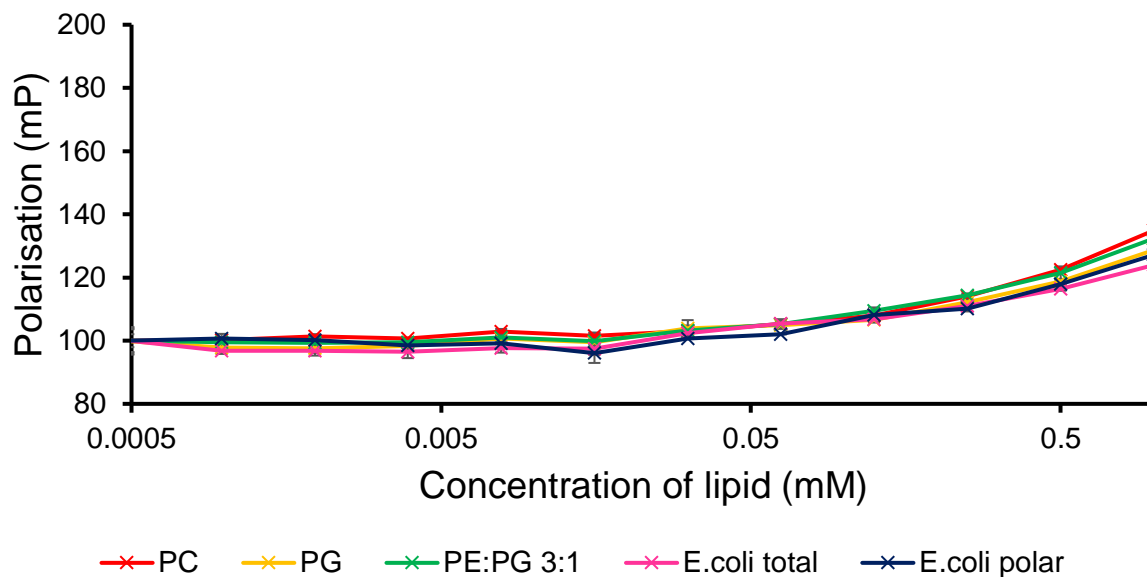

Figure S84 – Effect of fluorescent SSA 8 (0.15 mM) on FP measured in synthetic vesicles at 25 °C. A target FP value of 100 mP was set to fluorescent SSA 8 alone.

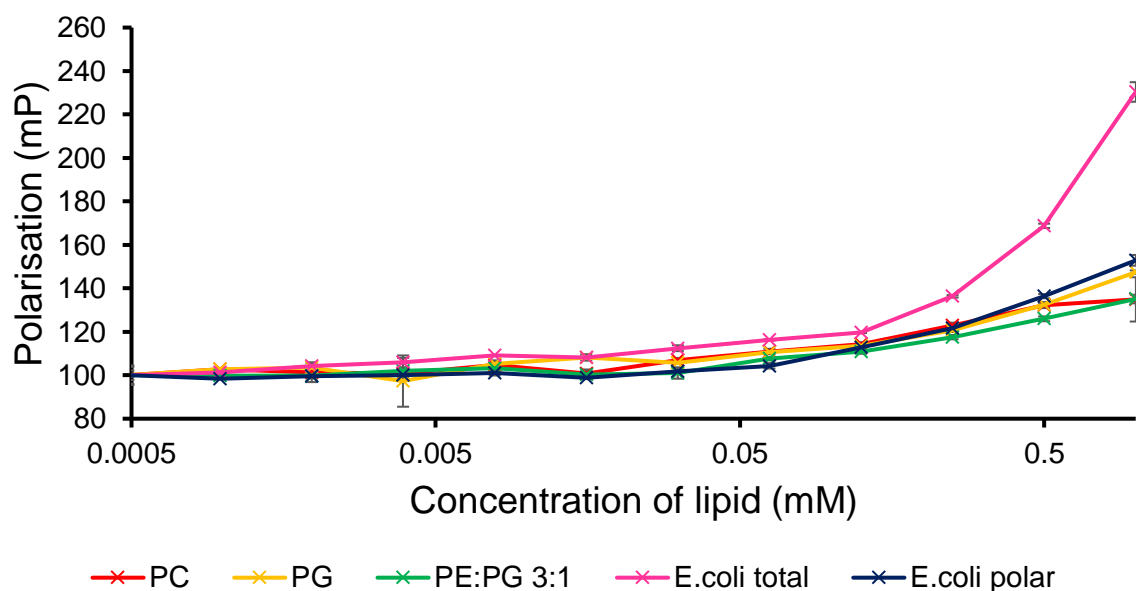

Figure S85 – Effect of fluorescent SSA 9 (0.15 mM) on FP measured in synthetic vesicles at 25 °C. A target FP value of 100 mP was set to fluorescent SSA 9 alone.

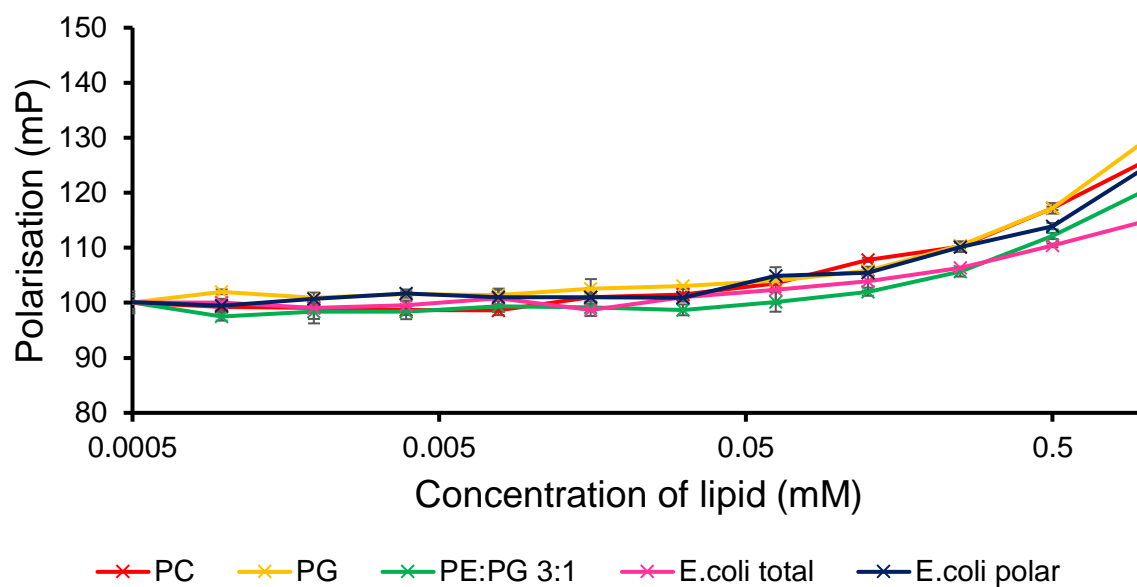

Figure S86 – Effect of fluorescent SSA **10** (0.15 mM) on FP measured in synthetic vesicles at 25 °C. A target FP value of 100 mP was set to fluorescent SSA **10** alone.

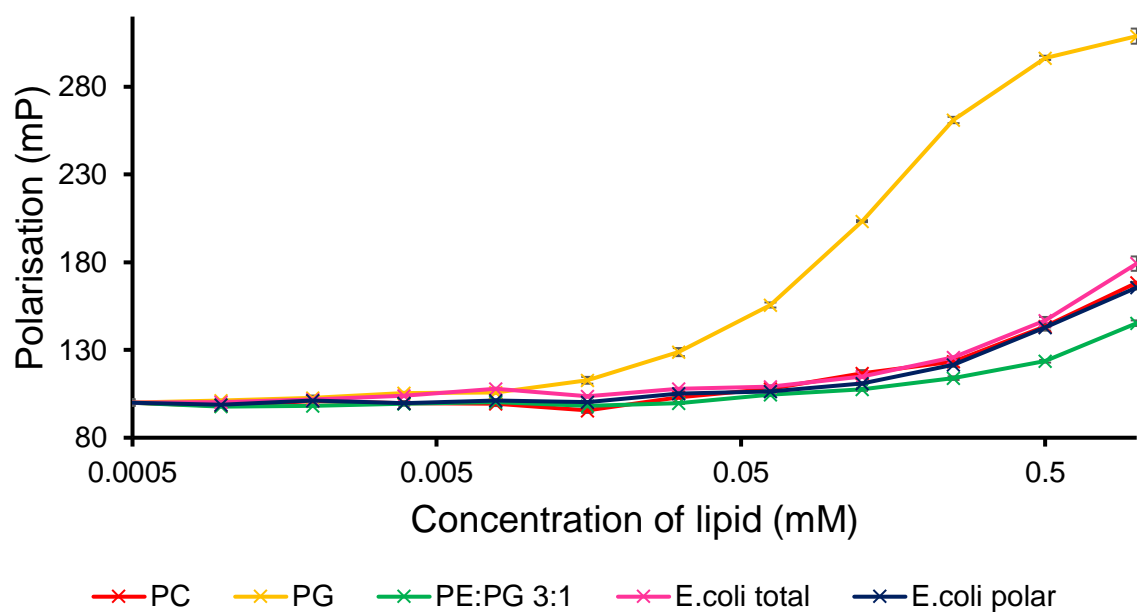

Figure S87 – Effect of fluorescent SSA **11** (0.15 mM) on FP measured in synthetic vesicles at 25 °C. A target FP value of 100 mP was set to fluorescent SSA **11** alone.

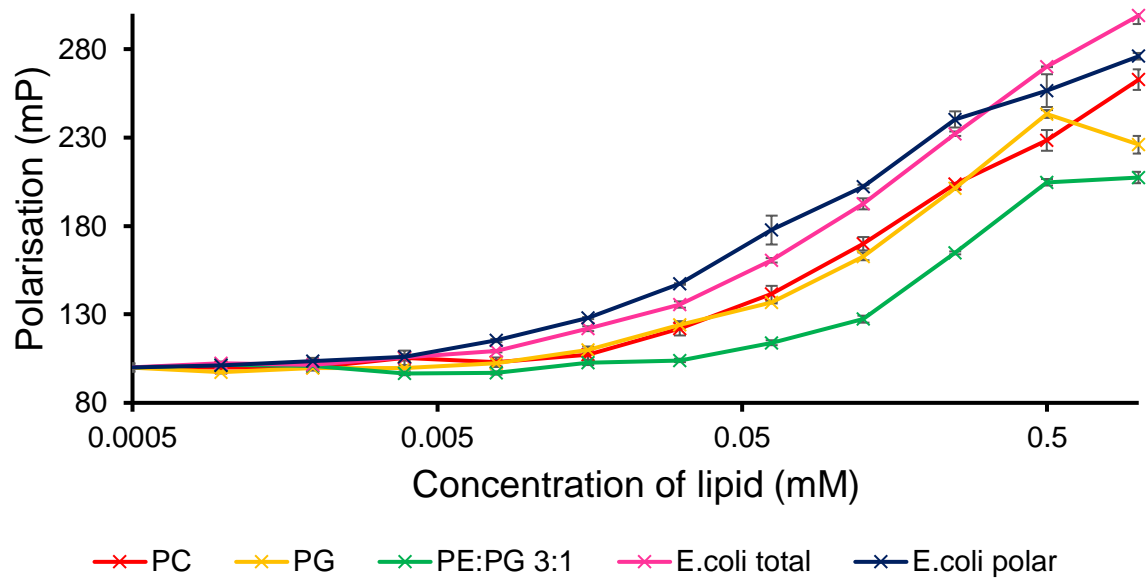

Figure S88 – Effect of fluorescent SSA **12** (0.15 mM) on FP measured in synthetic vesicles at 25 °C. A target FP value of 100 mP was set to fluorescent SSA **12** alone.

## Section 13: Nanodisc Coordination Data

### Nanodisc characterisation

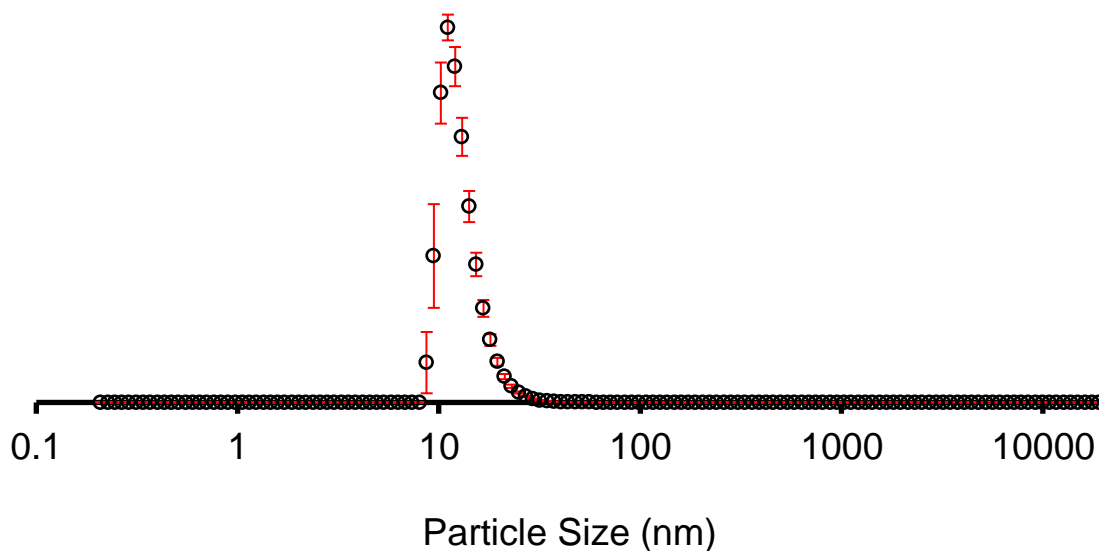

Figure S89 - Average number of weighted particle size distribution of PC nanodiscs (100  $\mu\text{mol}$ s) in buffer (NaCl 20 mM,  $\text{NaH}_2\text{PO}_4$  20 mM, pH 7.4), calculated from 10 DLS runs at 298 K.

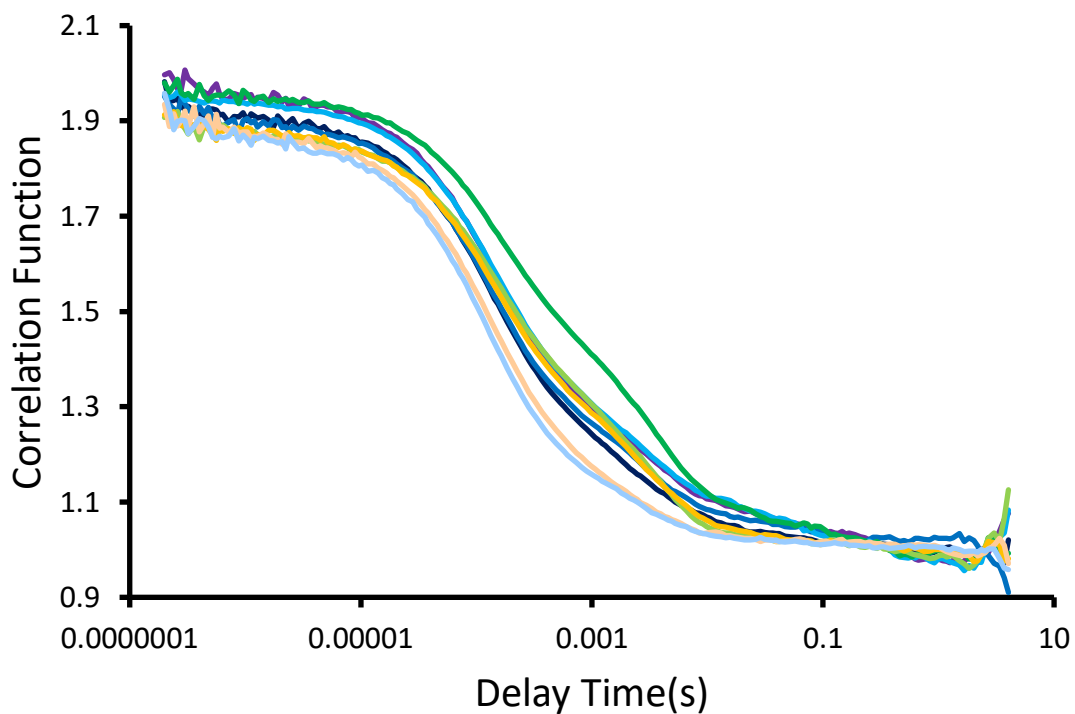

Figure S90 – Correlation function data for 10 DLS runs of PC nanodiscs (100  $\mu\text{mol}$ s) in buffer (NaCl 20 mM,  $\text{NaH}_2\text{PO}_4$  20 mM, pH 7.4) at 298 K.



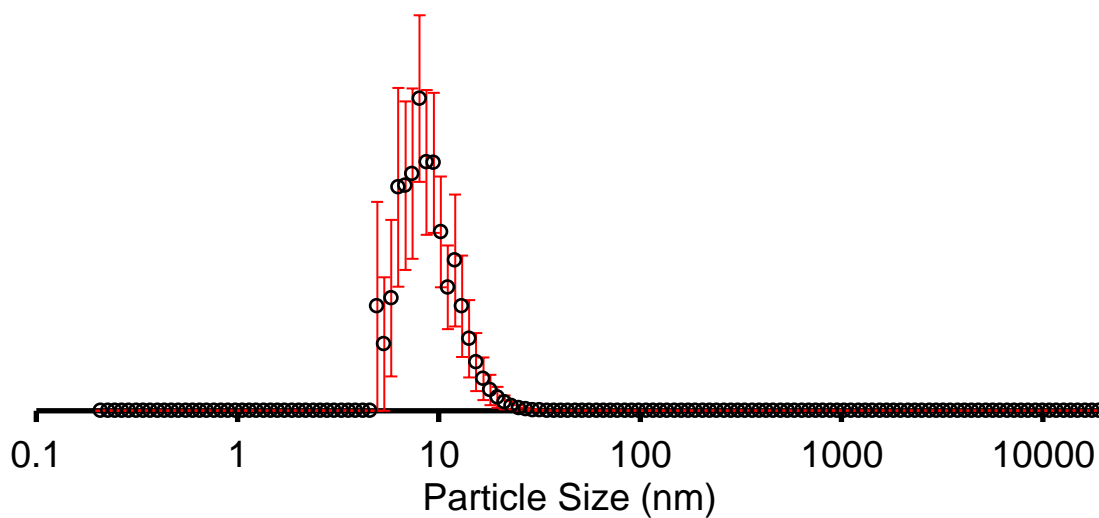

Figure S91 - Average number of weighted particle size distribution of PG nanodiscs (100  $\mu$ mol) in buffer (NaCl 20 mM,  $\text{NaH}_2\text{PO}_4$  20 mM, pH 7.4), calculated from 10 DLS runs at 298 K.

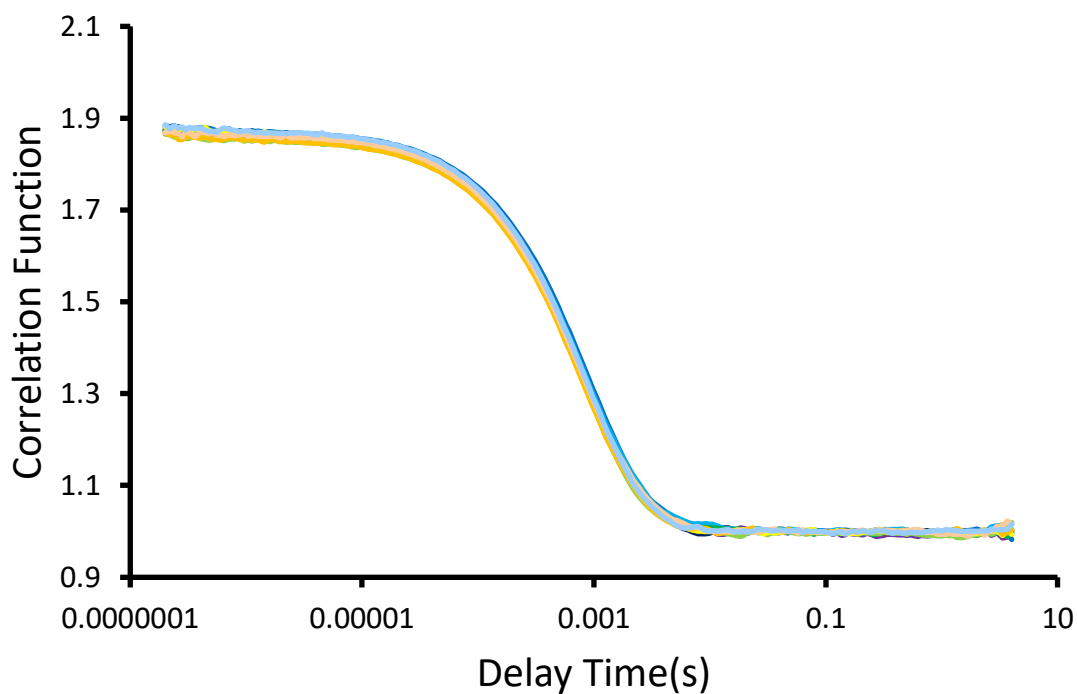

Figure S92 - Correlation function data for 10 DLS runs of PG nanodiscs (100  $\mu$ mol) in buffer (NaCl 20 mM,  $\text{NaH}_2\text{PO}_4$  20 mM, pH 7.4) at 298 K.

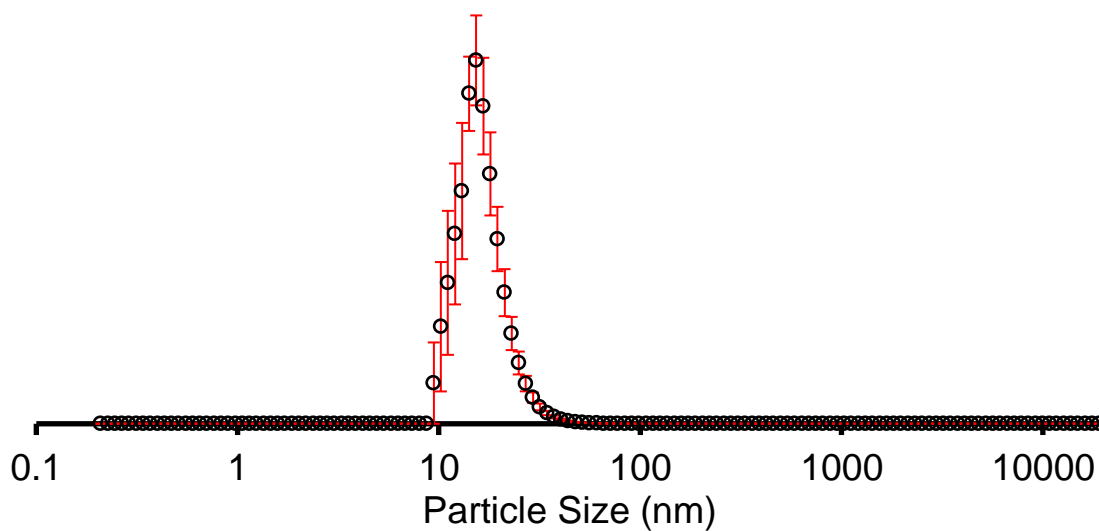

Figure S93 - Average number of weighted particle size distribution of PE:PG 3:1 mix nanodiscs (100  $\mu$ mol) in buffer (NaCl 20 mM,  $\text{NaH}_2\text{PO}_4$  20 mM, pH 7.4), calculated from 10 DLS runs at 298 K.

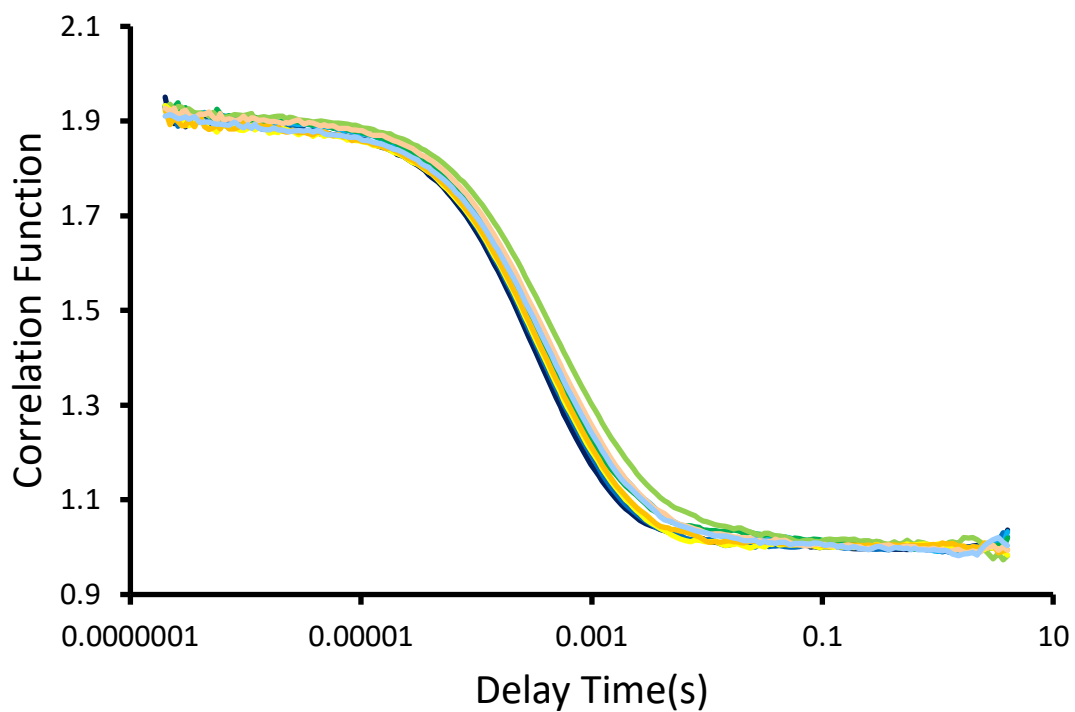

Figure S94 - Correlation function data for 10 DLS runs of of PE:PG 3:1 mix nanodiscs (100  $\mu$ mol) in buffer (NaCl 20 mM,  $\text{NaH}_2\text{PO}_4$  20 mM, pH 7.4) at 298 K.

### Nanodisc titrations

All titrations carried out in buffer (NaCl 20 mM, NaH<sub>2</sub>PO<sub>4</sub>, pH 7.4), 5 % D<sub>2</sub>O and 0.02 mM DSS. Concentration of SSA was kept at 100 μM, with increasing concentration of nanodisc.

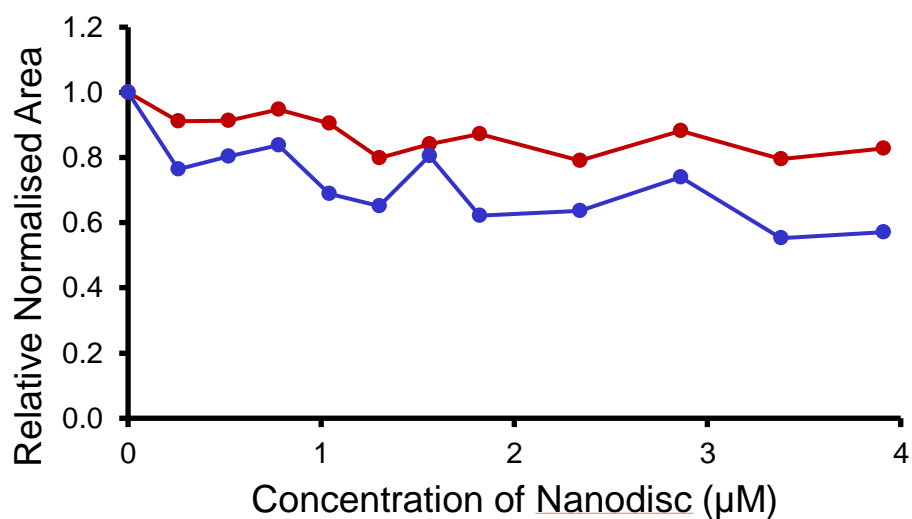

Figure S95 - The relative normalised area of a downfield aromatic resonance of SSA 5 (red) and its associated TBA cation (blue) upon titration with synthetic PC nanodiscs.

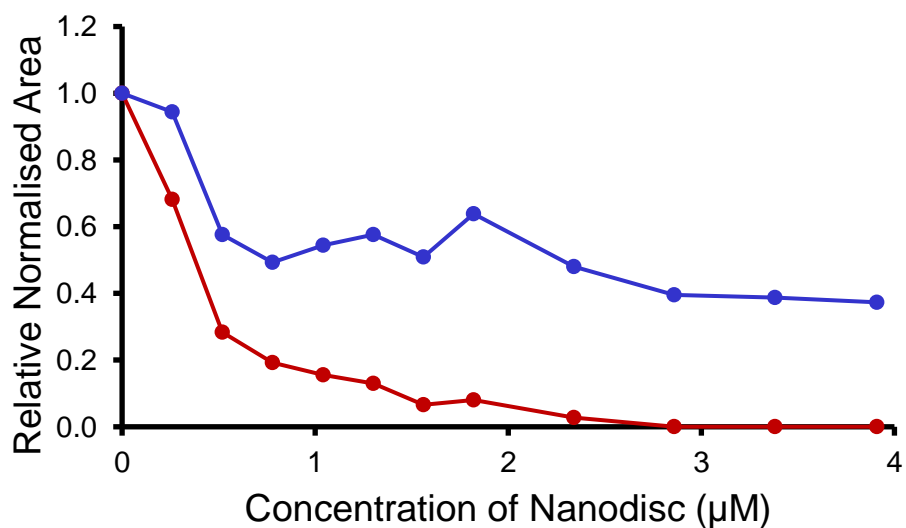

Figure S96 - The relative normalised area of a downfield aromatic resonance of SSA 6 (red) and its associated TBA cation (blue) upon titration with synthetic PC nanodiscs.

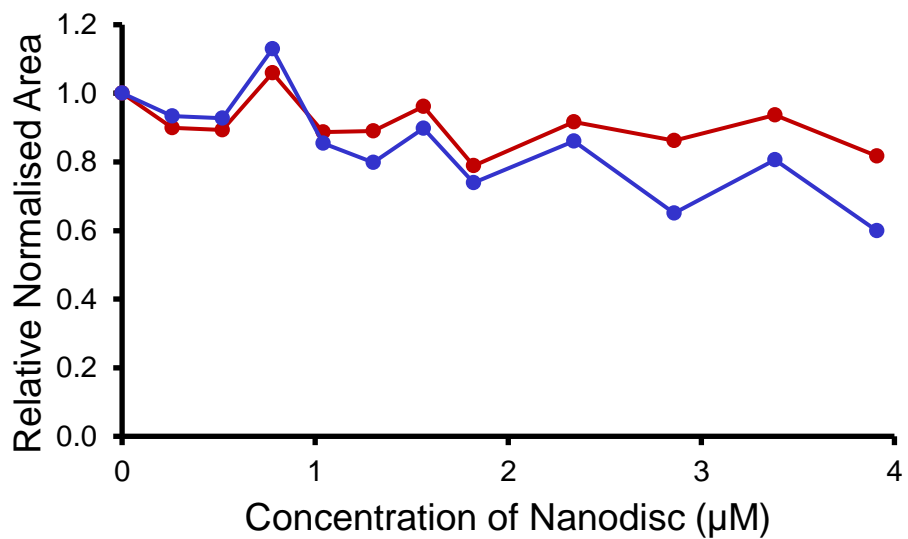

Figure S97 - The relative normalised area of a downfield aromatic resonance of SSA **7** (red) and its associated TBA cation (blue) upon titration with synthetic PC nanodiscs.

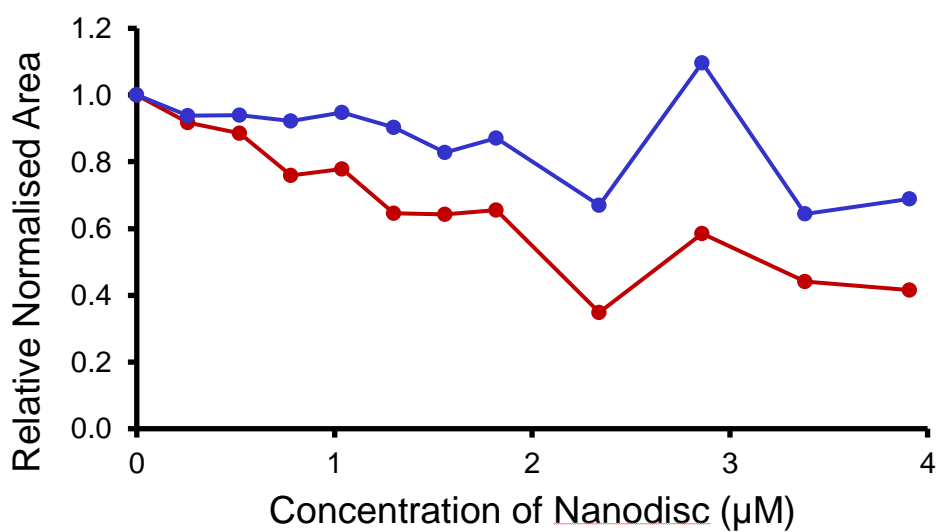

Figure S98 - The relative normalised area of a downfield aromatic resonance of SSA **8** (red) and its associated TBA cation (blue) upon titration with synthetic PC nanodiscs.

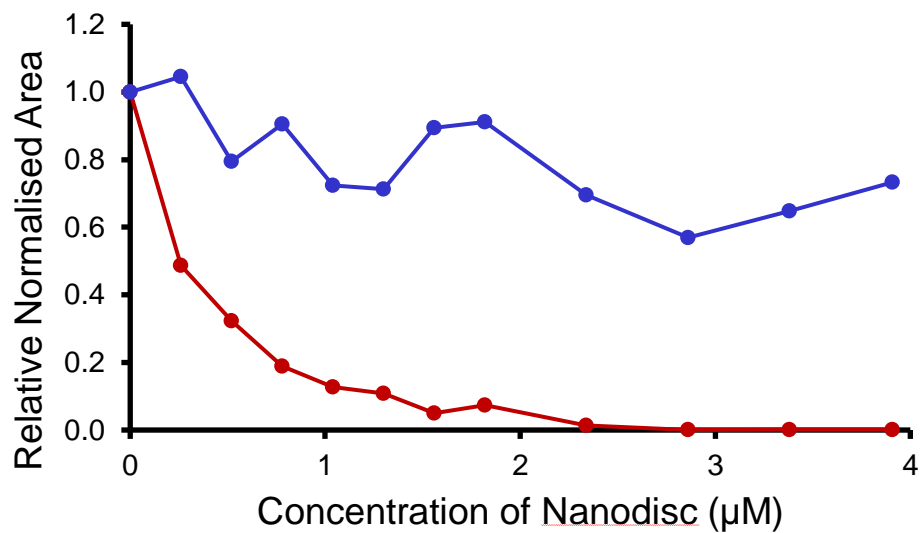

Figure S99 - The relative normalised area of a downfield aromatic resonance of SSA **9** (red) and its associated TBA cation (blue) upon titration with synthetic PC nanodiscs.

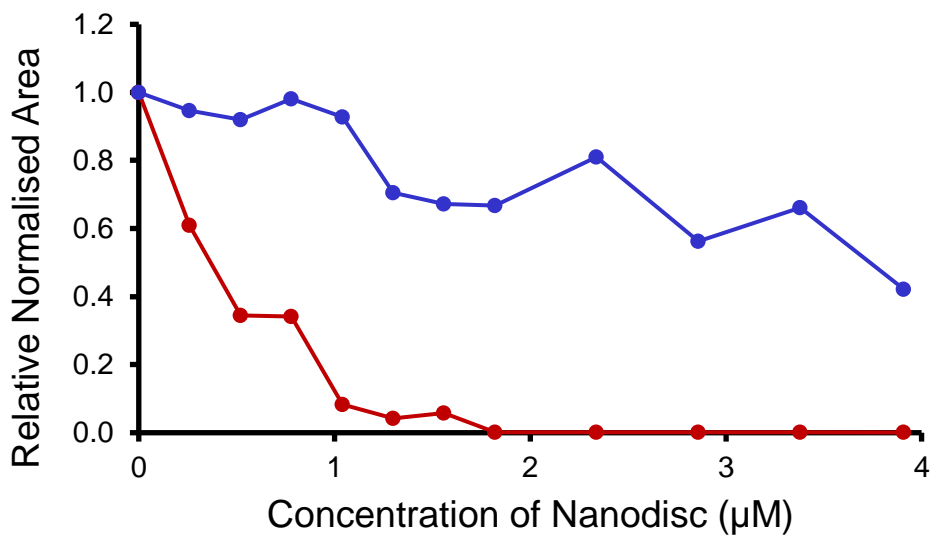

Figure S100 - The relative normalised area of a downfield aromatic resonance of SSA **10** (red) and its associated TBA cation (blue) upon titration with synthetic PC nanodiscs.

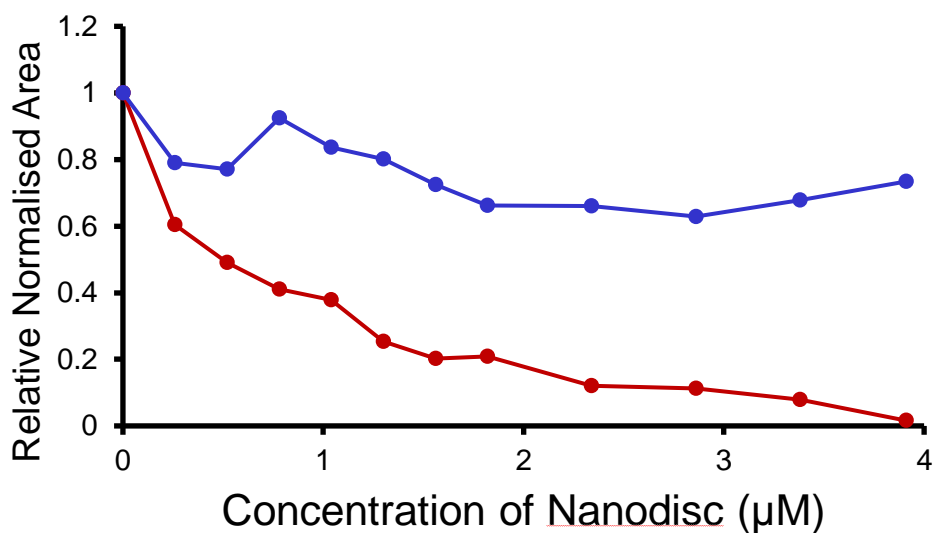

Figure S101 - The relative normalised area of a downfield aromatic resonance of SSA **11** (red) and its associated TBA cation (blue) upon titration with synthetic PC nanodiscs.

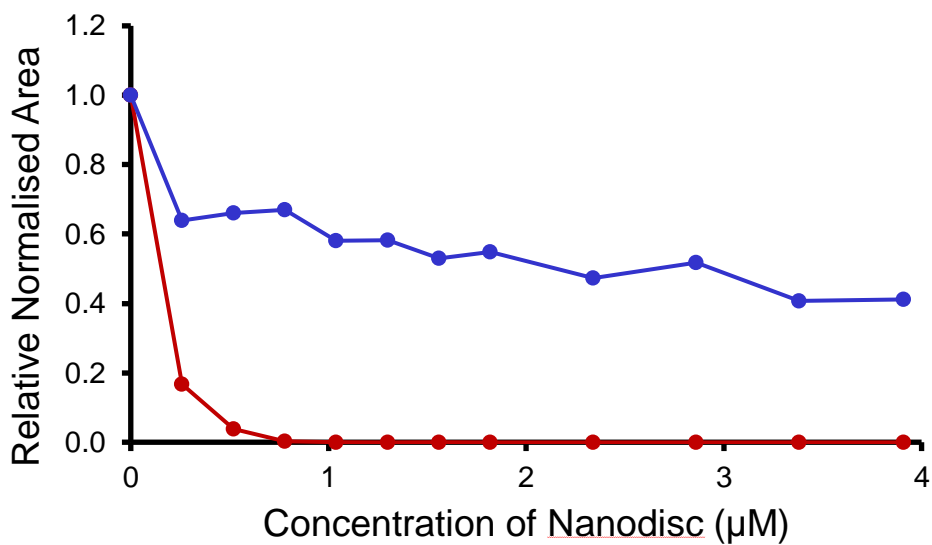

Figure S102 - The relative normalised area of a downfield aromatic resonance of SSA **12** (red) and its associated TBA cation (blue) upon titration with synthetic PC nanodiscs.

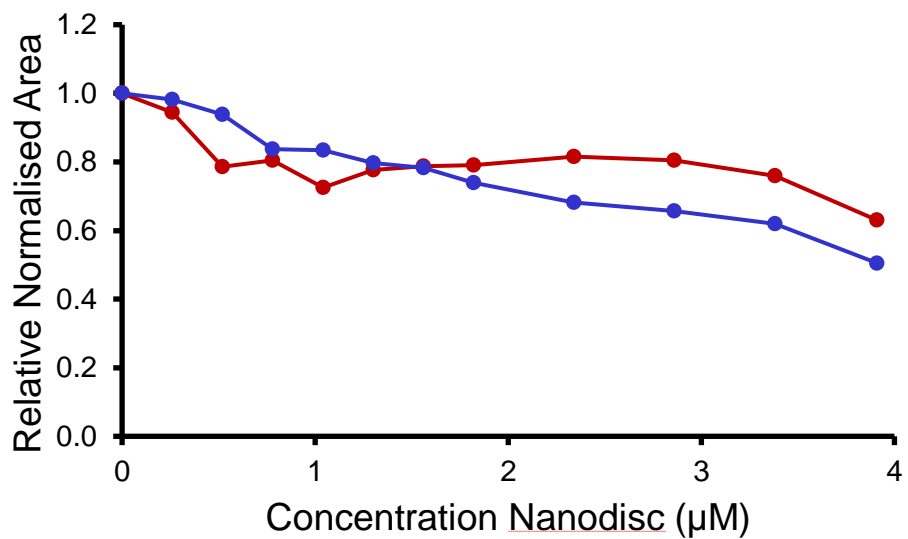

Figure S103 - The relative normalised area of a downfield aromatic resonance of SSA 5 (red) and its associated TBA cation (blue) upon titration with synthetic PG nanodiscs.

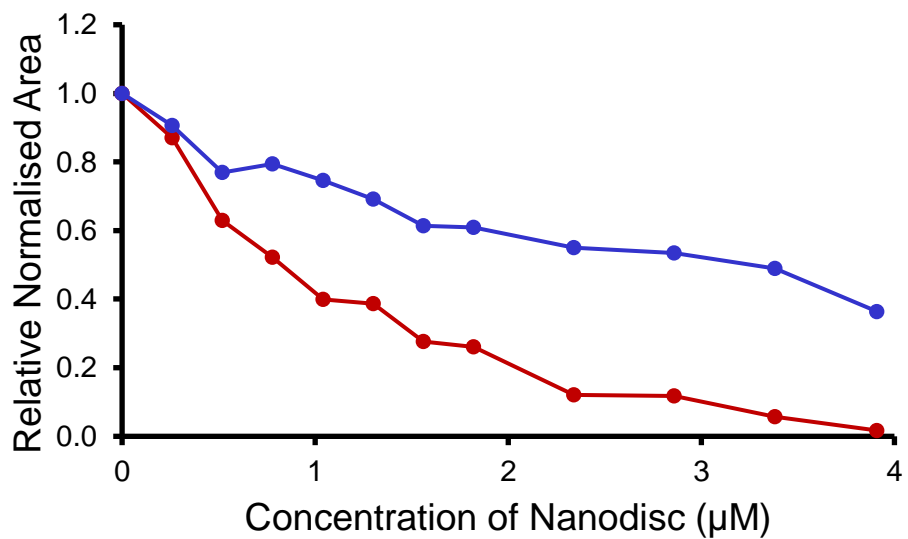

Figure S104 - The relative normalised area of a downfield aromatic resonance of SSA 6 (red) and its associated TBA cation (blue) upon titration with synthetic PG nanodiscs.

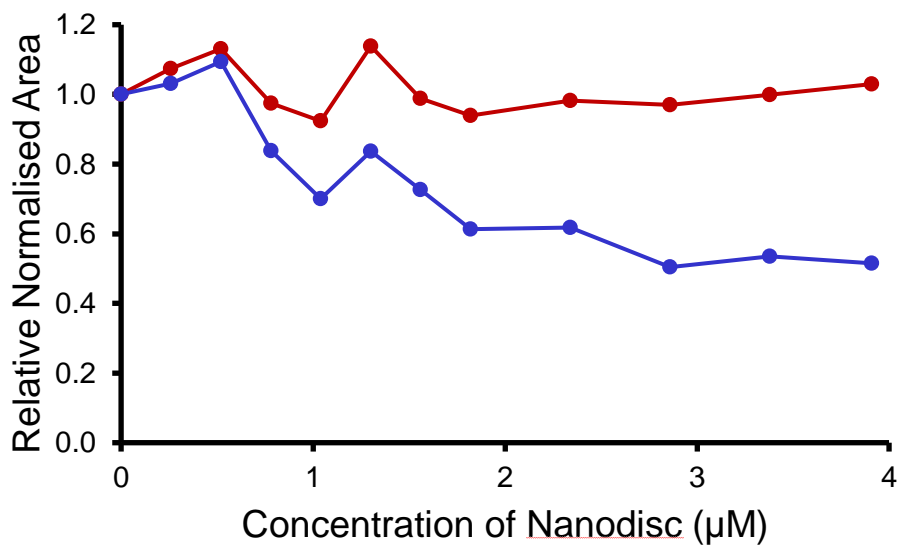

Figure S105 - The relative normalised area of a downfield aromatic resonance of SSA **7** (red) and its associated TBA cation (blue) upon titration with synthetic PG nanodiscs.

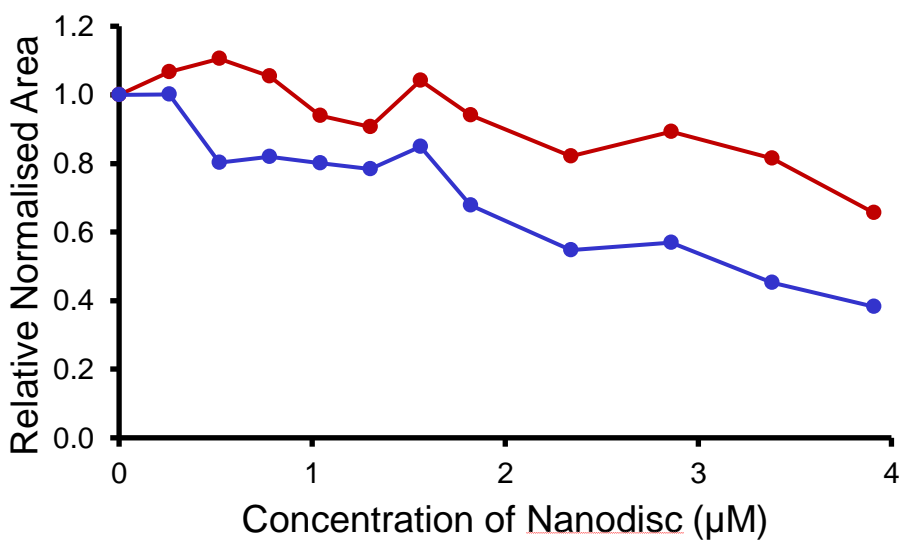

Figure S106 - The relative normalised area of a downfield aromatic resonance of SSA **8** (red) and its associated TBA cation (blue) upon titration with synthetic PG nanodiscs.



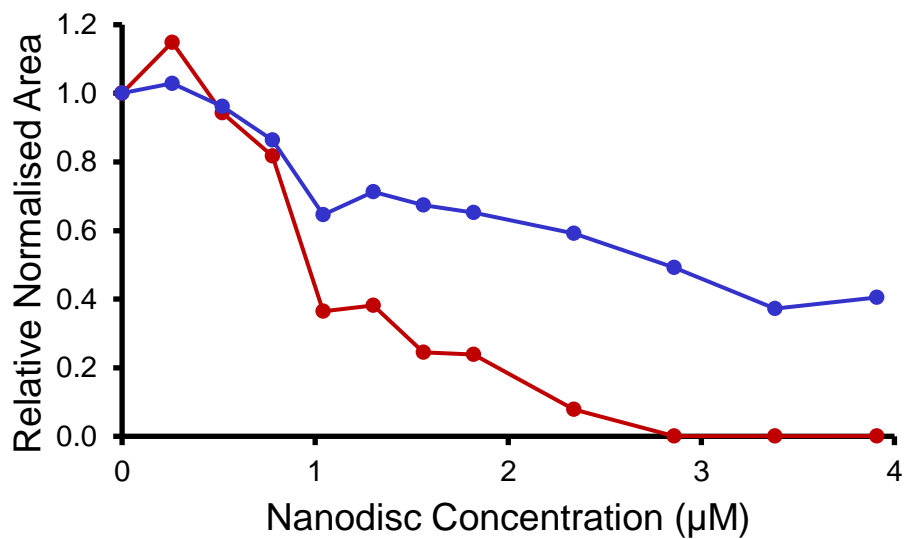

Figure S107 - The relative normalised area of a downfield aromatic resonance of SSA **9** (red) and its associated TBA cation (blue) upon titration with synthetic PG nanodiscs.

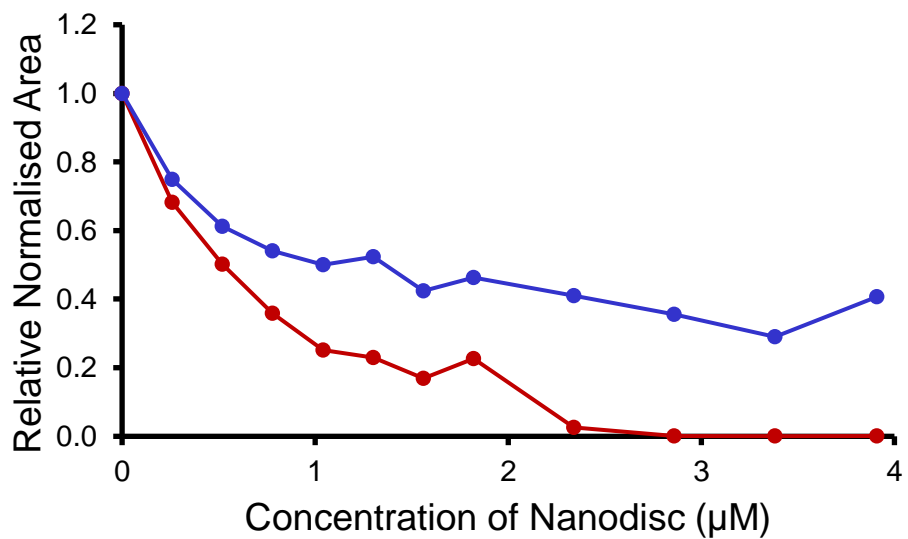

Figure S108 - The relative normalised area of a downfield aromatic resonance of SSA **10** (red) and its associated TBA cation (blue) upon titration with synthetic PG nanodiscs.

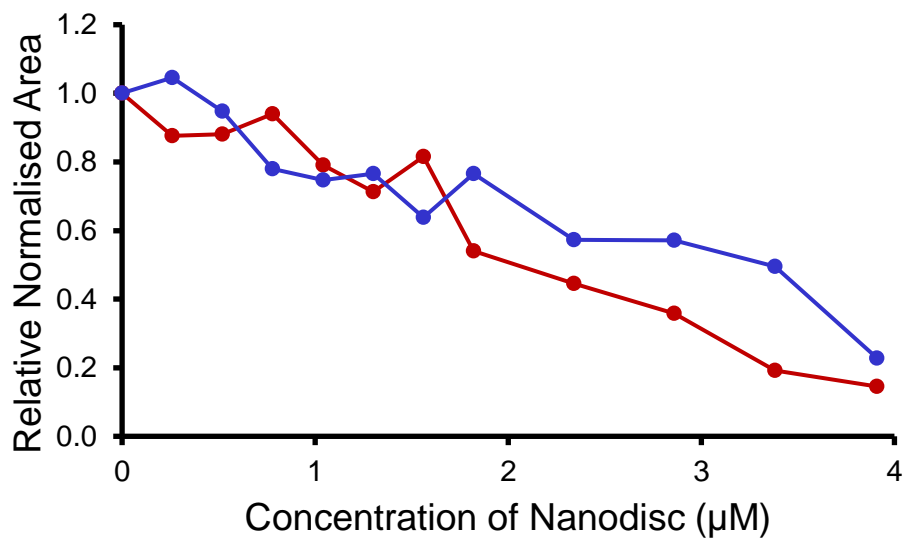

Figure S109 - The relative normalised area of a downfield aromatic resonance of SSA **11** (red) and its associated TBA cation (blue) upon titration with synthetic PG nanodiscs.

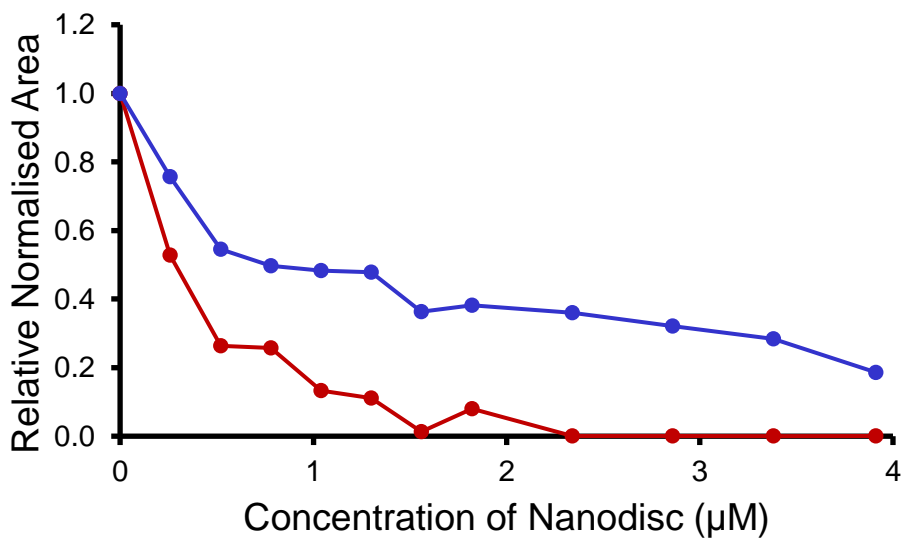

Figure S110 - The relative normalised area of a downfield aromatic resonance of SSA **12** (red) and its associated TBA cation (blue) upon titration with synthetic PG nanodiscs.

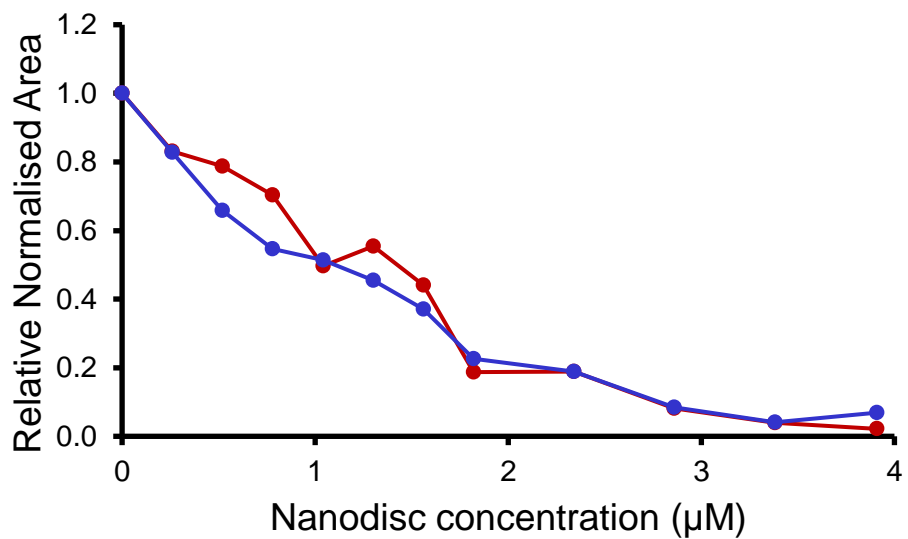

Figure S111 - The relative normalised area of a downfield aromatic resonance of SSA 5 (red) and its associated TBA cation (blue) upon titration with synthetic PE:PG 3:1 mix nanodiscs.

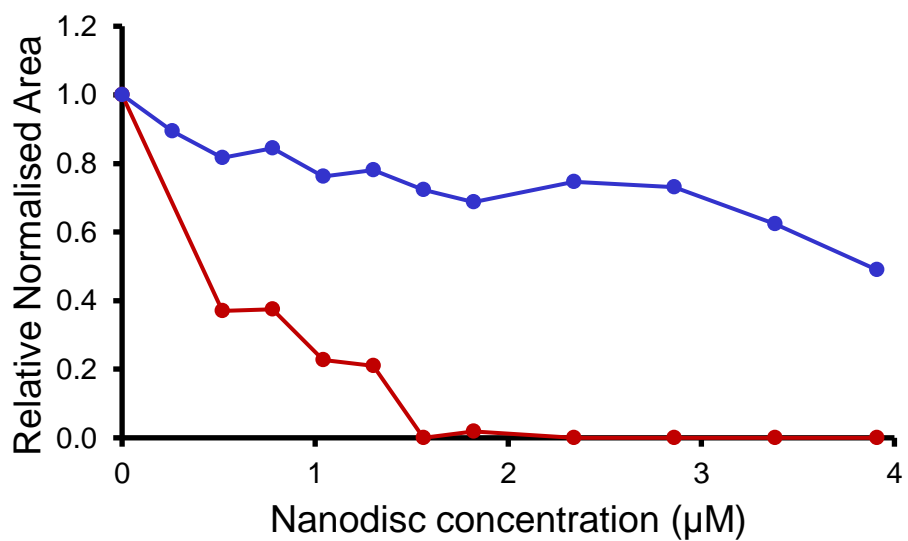

Figure S112 - The relative normalised area of a downfield aromatic resonance of SSA 6 (red) and its associated TBA cation (blue) upon titration with synthetic PE:PG 3:1 mix nanodiscs.

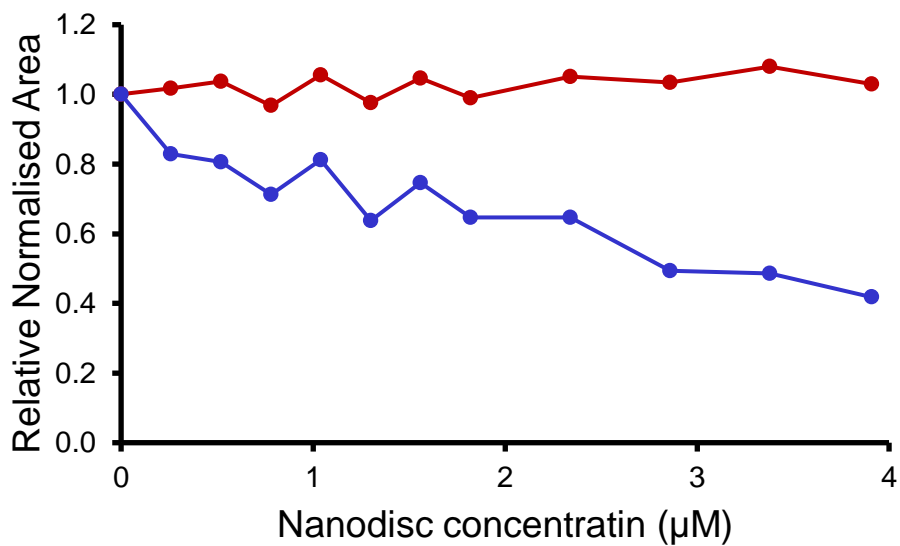

Figure S113 - The relative normalised area of a downfield aromatic resonance of SSA **7** (red) and its associated TBA cation (blue) upon titration with synthetic PE:PG 3:1 mix nanodiscs.

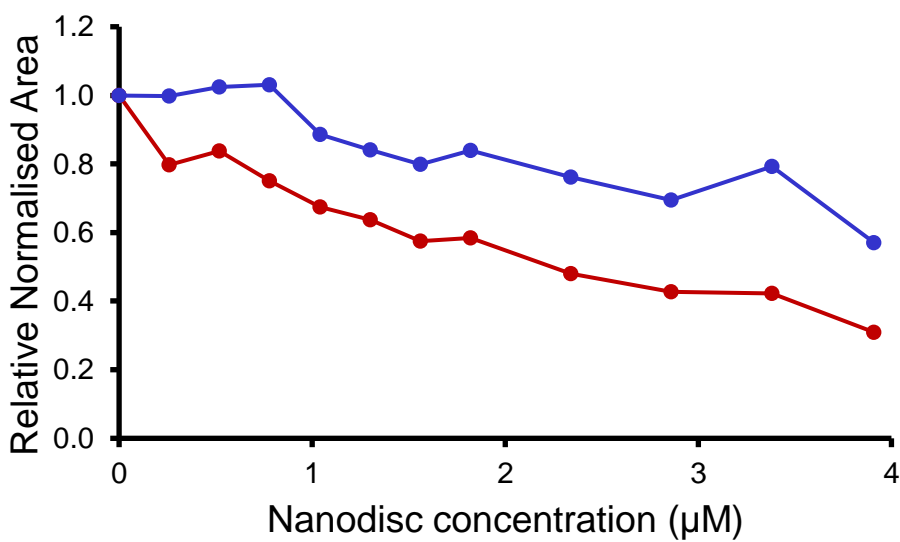

Figure S114 - The relative normalised area of a downfield aromatic resonance of SSA **8** (red) and its associated TBA cation (blue) upon titration with synthetic PE:PG 3:1 mix nanodiscs.

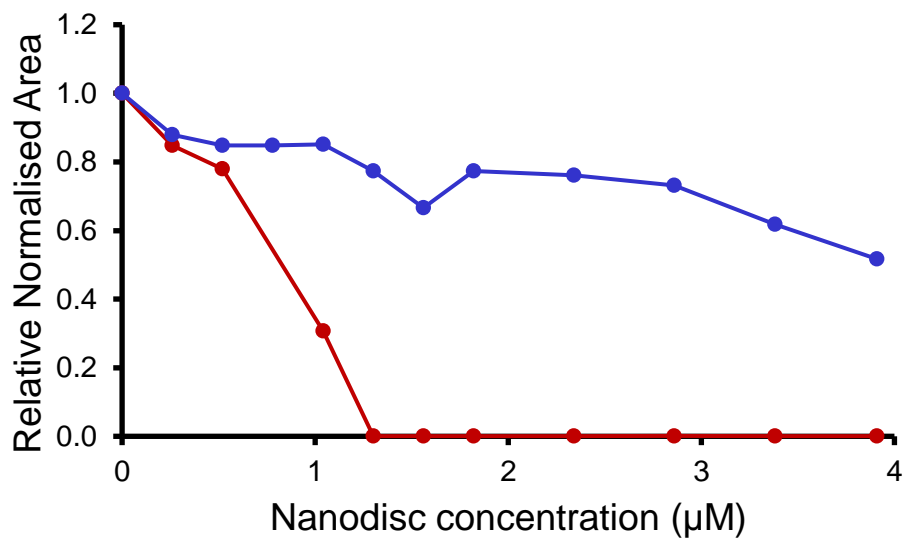

Figure S115 - The relative normalised area of a downfield aromatic resonance of SSA **9** (red) and its associated TBA cation (blue) upon titration with synthetic PE:PG 3:1 mix nanodiscs.

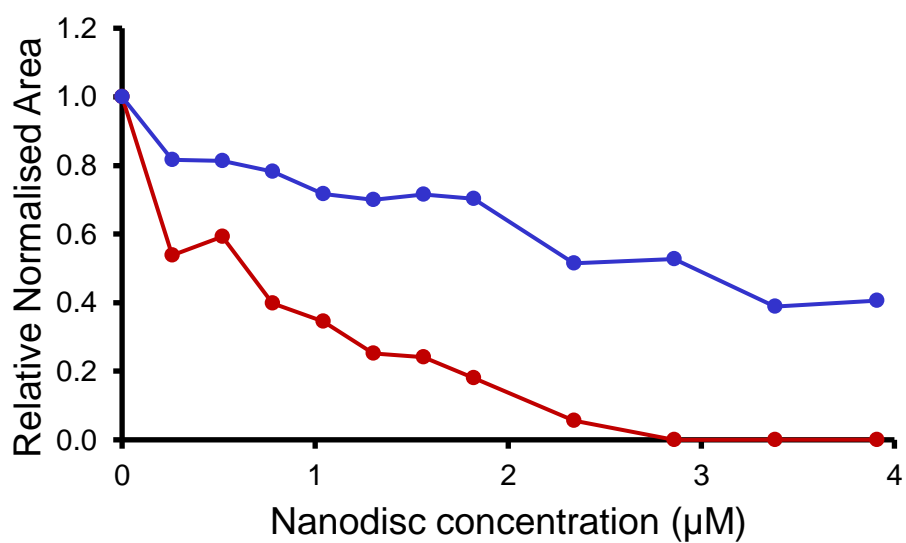

Figure S116 - The relative normalised area of a downfield aromatic resonance of SSA **10** (red) and its associated TBA cation (blue) upon titration with synthetic PE:PG 3:1 mix nanodiscs.

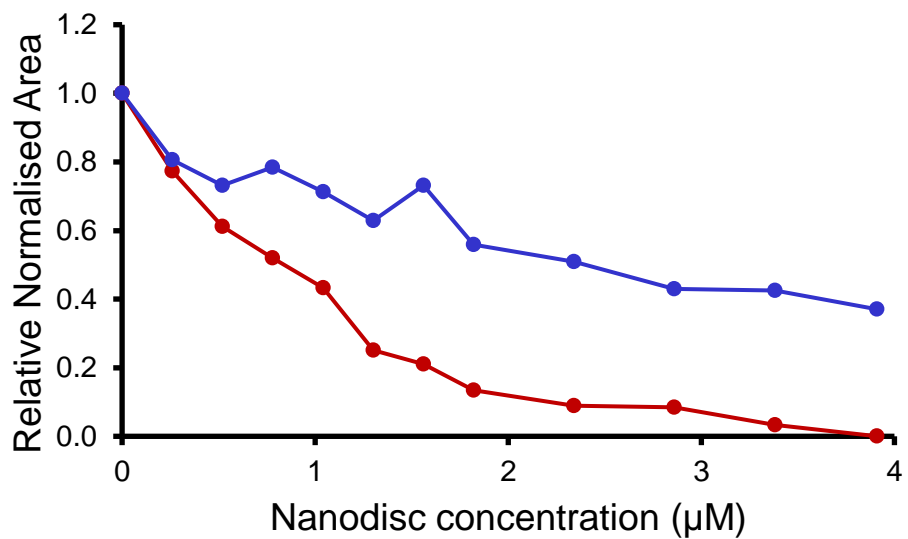

Figure S117 - The relative normalised area of a downfield aromatic resonance of SSA **11** (red) and its associated TBA cation (blue) upon titration with synthetic PE:PG 3:1 mix nanodiscs.

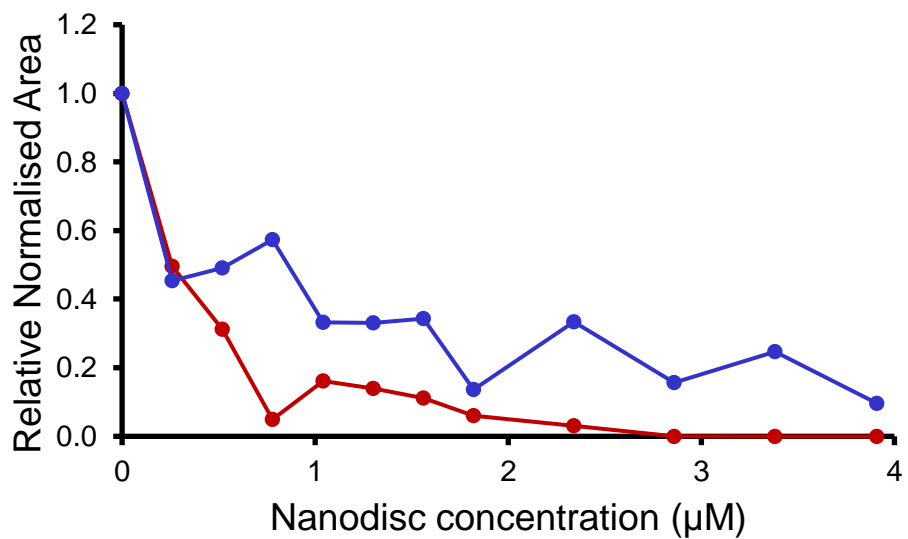

Figure S118 - The relative normalised area of a downfield aromatic resonance of SSA **12** (red) and its associated TBA cation (blue) upon titration with synthetic PE:PG 3:1 mix nanodiscs.

## Section 14: Determination of Nanodisc Coordination EC<sub>50</sub> Values

To enable further comparison of these data, they were fitted to both Michaelis-Menten and Hill Plot models to enable calculation of the concentration of nanodisc required to coordinate 50 % of either the SSA anionic or cationic component independently.

Comparative R<sup>2</sup> analysis of the fits obtained from the SSA anion and cation titration data to either Michaelis-Menten or Hill Plot kinetics using Origin 2018 software, with V<sub>max</sub> fixed to 100 % of the SSA component to become NMR silent, supported the use of the Hill plot model to fit these data, which are summarised in Table S4.

Table S4 - EC<sub>50</sub> (μM) and hill coefficient (*n*) values obtained from the fitting of nanodisc titration data to Hill Plot kinetics using Origin 2018 software, with V<sub>max</sub> fixed as 100 % of the SSA component to become NMR silent, and thus we assume bound to the phospholipid nanodisc. R<sup>2</sup> > 0.85 for all data fits reported. A = anionic SSA component. C = cationic SSA component. Nanodisc phospholipid compositions are summarised in Table 2 – main manuscript.

| SSA  | PC               |                  | PG               |                 | PE:PG mix        |                  |
|------|------------------|------------------|------------------|-----------------|------------------|------------------|
|      | EC <sub>50</sub> | <i>n</i>         | EC <sub>50</sub> | <i>n</i>        | EC <sub>50</sub> | <i>n</i>         |
| 5 A  | <i>a</i>         | <i>a</i>         | <i>a</i>         | <i>a</i>        | 1.14<br>(±0.08)  | 2.05<br>(±0.29)  |
| 5 C  | <i>a</i>         | <i>a</i>         | <i>b</i>         | 1.11<br>(±0.09) | 0.93<br>(±<0.01) | 1.60<br>(±0.01)  |
| 6 A  | 0.36<br>(±0.02)  | 1.84<br>(±0.12)  | 0.82<br>(±0.04)  | 1.60<br>(±0.11) | 0.46<br>(±0.07)  | 1.85<br>(±0.40)  |
| 6 C  | <i>a</i>         | <i>a</i>         | 2.86<br>(±0.18)  | 0.93<br>(±0.08) | <i>b</i>         | 0.70<br>(±0.14)  |
| 7 A  | <i>a</i>         | <i>a</i>         | <i>a</i>         | <i>a</i>        | <i>a</i>         | <i>a</i>         |
| 7 C  | <i>a</i>         | <i>a</i>         | 3.42<br>(±0.02)  | 1.20<br>(±0.01) | 3.44<br>(±0.51)  | 0.81<br>(±0.14)  |
| 8 A  | 2.66<br>(±0.31)  | 1.06<br>(±0.19)  | <i>a</i>         | <i>a</i>        | 2.20<br>(±0.13)  | 0.98<br>(±0.09)  |
| 8 C  | <i>a</i>         | <i>a</i>         | 3.11<br>(±0.28)  | 1.35<br>(±0.21) | <i>a</i>         | <i>a</i>         |
| 9 A  | 0.27<br>(±0.02)  | 1.43<br>(±0.10)  | 1.07<br>(±0.06)  | 3.29<br>(±0.57) | 0.73<br>(±0.05)  | 3.76<br>(±0.62)  |
| 9 C  | <i>b</i>         | 0.71<br>(±<0.01) | 2.69<br>(±0.20)  | 1.34<br>(±0.18) | <i>a</i>         | <i>a</i>         |
| 10 A | 0.36<br>(±0.03)  | 1.80<br>(±0.23)  | 0.50<br>(±0.04)  | 1.47<br>(±0.16) | 0.50<br>(±0.08)  | 1.25<br>(±0.21)  |
| 10 C | <i>b</i>         | 1.27<br>(±<0.01) | 1.16<br>(±0.06)  | 0.67<br>(±0.05) | 2.92<br>(±0.30)  | 0.95<br>(±0.14)  |
| 11 A | 0.49<br>(±0.04)  | 1.10<br>(±0.10)  | 2.10<br>(±0.11)  | 2.41<br>(±0.33) | 0.72<br>(±0.04)  | 1.69<br>(±0.15)  |
| 11 C | <i>a</i>         | <i>a</i>         | 2.82<br>(±0.28)  | 1.45<br>(±0.26) | 2.51<br>(±0.26)  | 0.87<br>(±0.13)  |
| 12 A | 0.14<br>(±0.01)  | 2.65<br>(±0.15)  | 0.29<br>(±0.02)  | 1.51<br>(±0.15) | 0.26<br>(±0.03)  | 1.44<br>(±0.20)  |
| 12 C | 2.24<br>(±0.31)  | 0.42<br>(±0.07)  | 0.90<br>(±0.07)  | 0.75<br>(±0.07) | 0.37<br>(±<0.01) | 0.62<br>(±<0.01) |

*a* - R<sup>2</sup> < 0.85, the results of data the fitting are not reported. *b* = Less than 50 % SSA becomes NMR silent at experimental endpoint (4.00 μM).

## Michaelis Menten fits

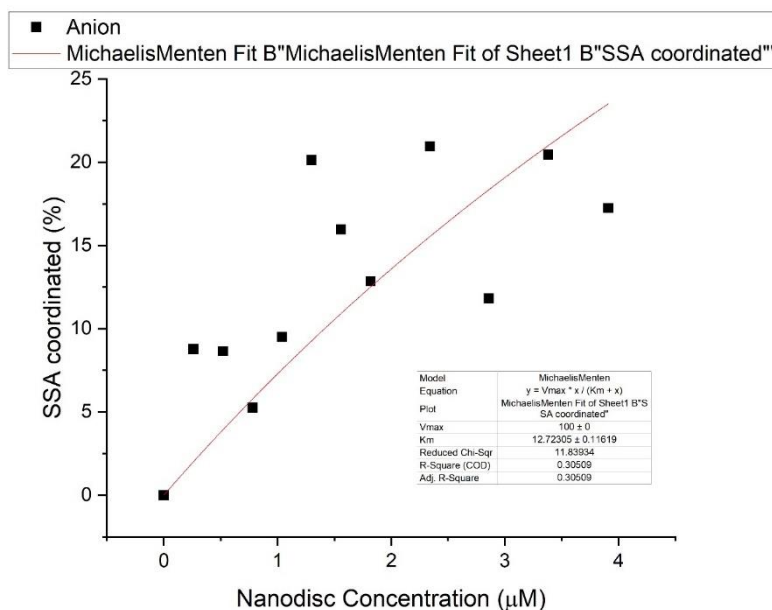

Figure S119 - Graph showing the percentage of SSA 5 anion coordinated to PC nanodiscs, with respect to increasing nanodisc concentration. Data was then fitted to the Michaelis Menten model with  $V_{max}$  fixed at 100 %.

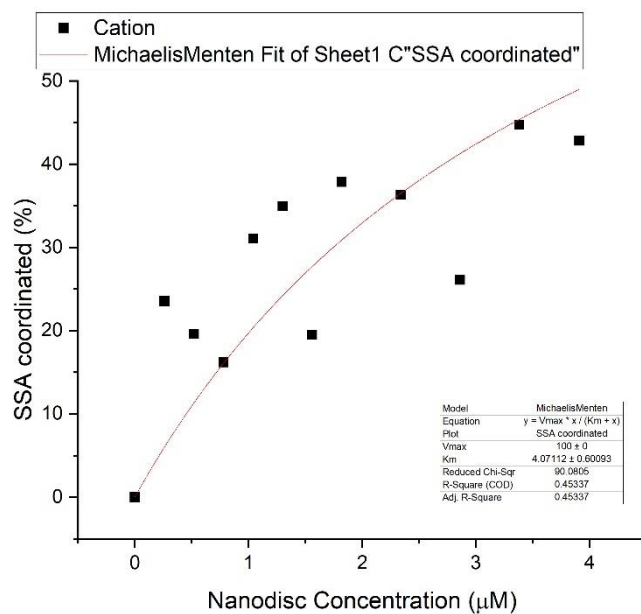

Figure S120 - Graph showing the percentage of SSA 5 cation coordinated to PC nanodiscs, with respect to increasing nanodisc concentration. Data was then fitted to the Michaelis Menten model with  $V_{max}$  fixed at 100 %.



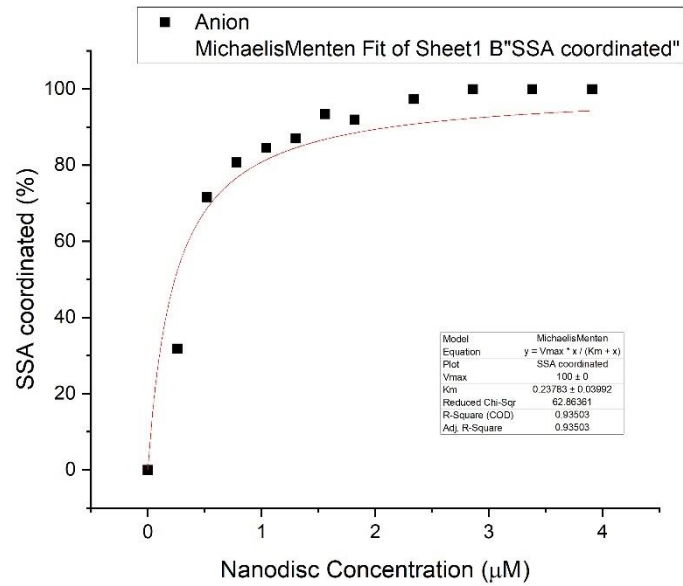

Figure S121 - Graph showing the percentage of SSA 6 anion coordinated to PC nanodiscs, with respect to increasing nanodisc concentration. Data was then fitted to the Michaelis Menten model with  $V_{max}$  fixed at 100 %.

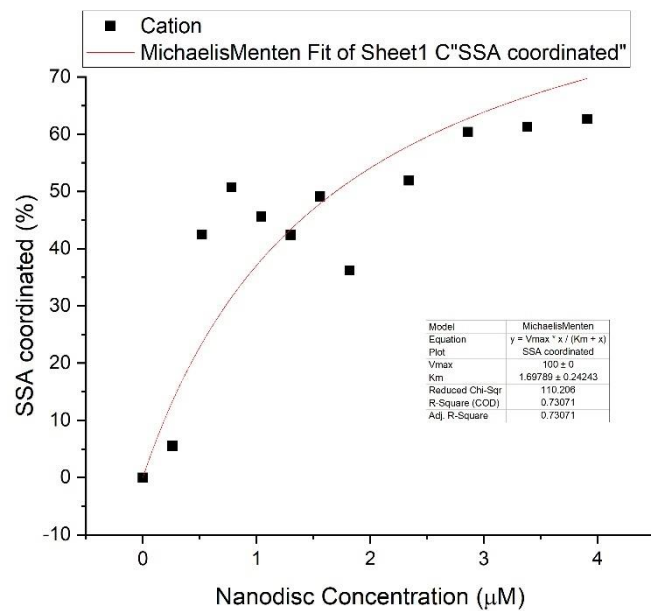

Figure S122 - Graph showing the percentage of SSA 6 cation coordinated to PC nanodiscs, with respect to increasing nanodisc concentration. Data was then fitted to the Michaelis Menten model with  $V_{max}$  fixed at 100 %.

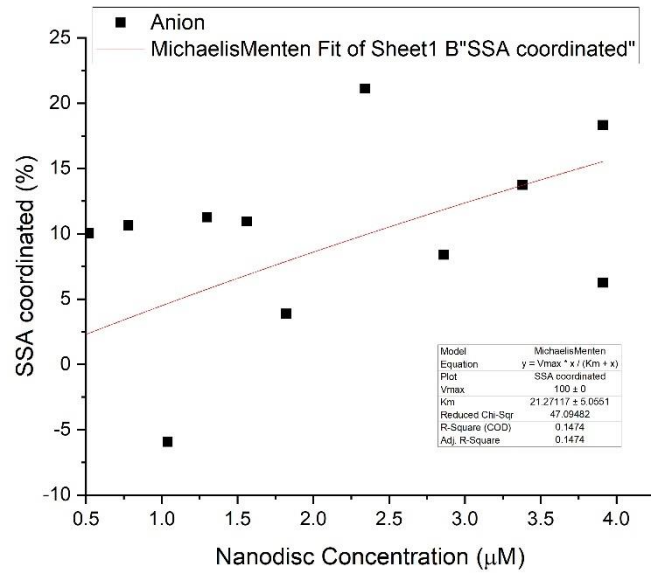

Figure S123 - Graph showing the percentage of SSA 7 anion coordinated to PC nanodiscs, with respect to increasing nanodisc concentration. Data was then fitted to the Michaelis Menten model with  $V_{max}$  fixed at 100 %.

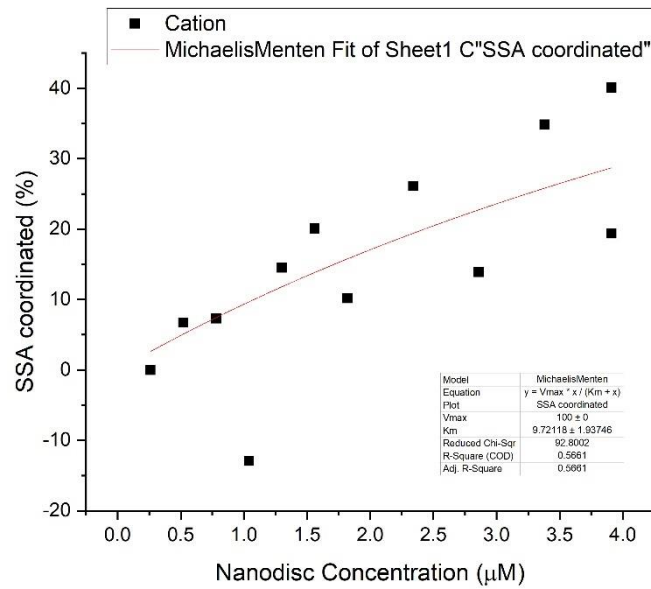

Figure S124 - Graph showing the percentage of SSA 7 cation coordinated to PC nanodiscs, with respect to increasing nanodisc concentration. Data was then fitted to the Michaelis Menten model with  $V_{max}$  fixed at 100 %.

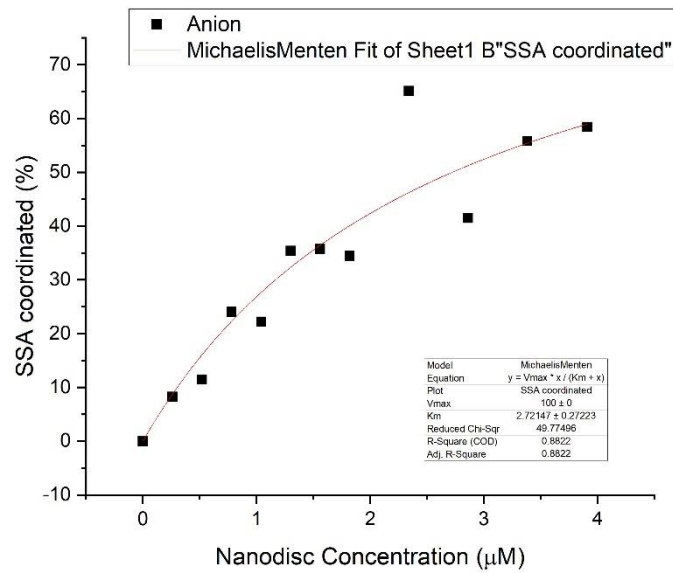

Figure S125 - Graph showing the percentage of SSA 8 anion coordinated to PC nanodiscs, with respect to increasing nanodisc concentration. Data was then fitted to the Michaelis Menten model with  $V_{max}$  fixed at 100 %.

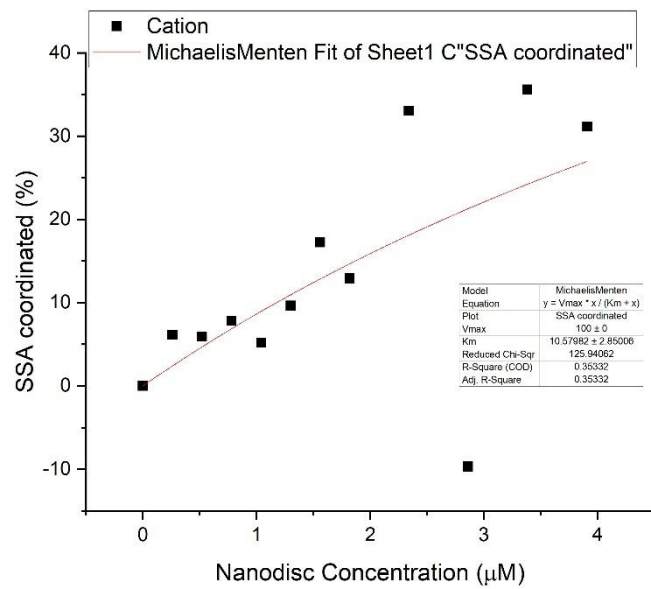

Figure S126 - Graph showing the percentage of SSA 8 cation coordinated to PC nanodiscs, with respect to increasing nanodisc concentration. Data was then fitted to the Michaelis Menten model with  $V_{max}$  fixed at 100 %.

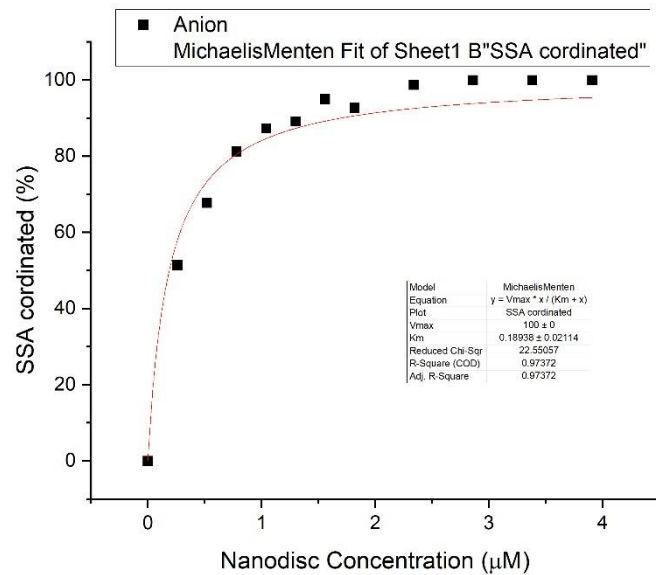

Figure S127 - Graph showing the percentage of SSA 9 anion coordinated to PC nanodiscs, with respect to increasing nanodisc concentration. Data was then fitted to the Michaelis Menten model with  $V_{max}$  fixed at 100 %.

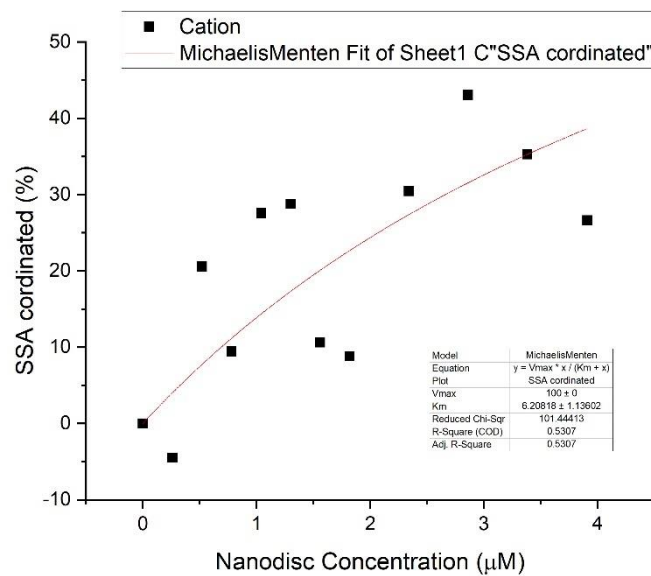

Figure S128 - Graph showing the percentage of SSA 8 cation coordinated to PC nanodiscs, with respect to increasing nanodisc concentration. Data was then fitted to the Michaelis Menten model with  $V_{max}$  fixed at 100 %.

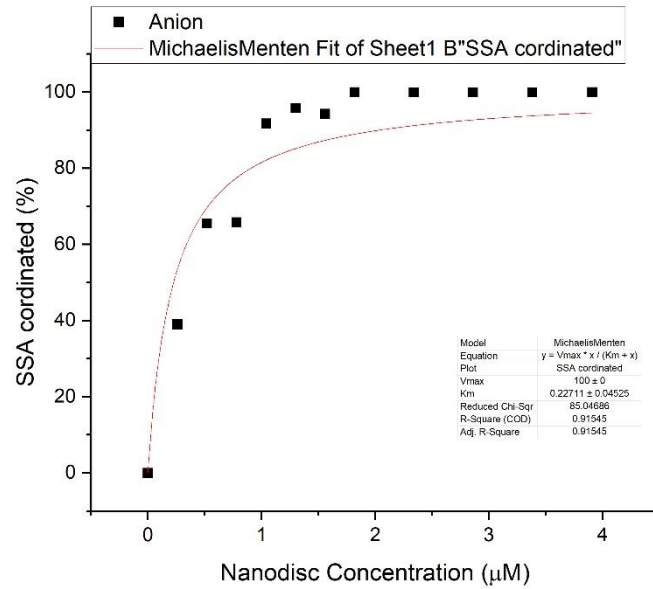

Figure S129 - Graph showing the percentage of SSA **10** anion coordinated to PC nanodiscs, with respect to increasing nanodisc concentration. Data was then fitted to the Michaelis Menten model with  $V_{max}$  fixed at 100 %.

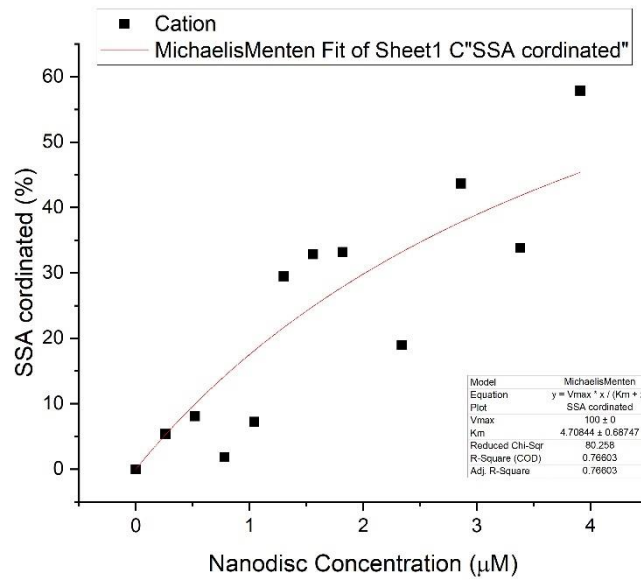

Figure S130 - Graph showing the percentage of SSA **10** cation coordinated to PC nanodiscs, with respect to increasing nanodisc concentration. Data was then fitted to the Michaelis Menten model with  $V_{max}$  fixed at 100 %.

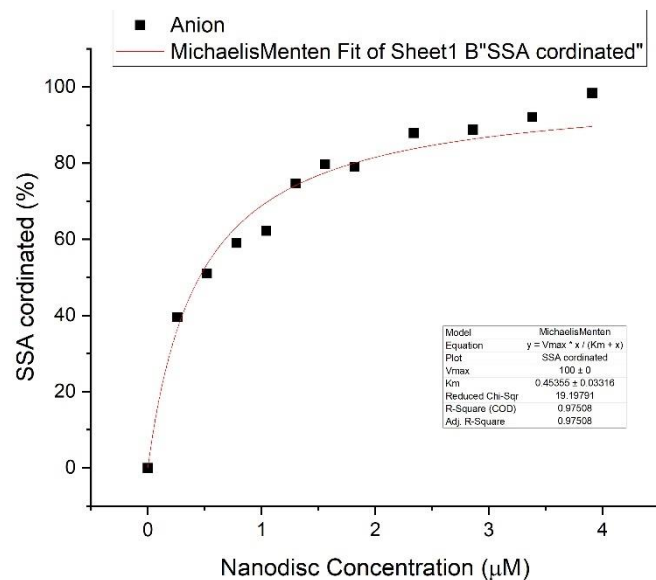

Figure S131 - Graph showing the percentage of SSA 11 anion coordinated to PC nanodiscs, with respect to increasing nanodisc concentration. Data was then fitted to the Michaelis Menten model with  $V_{max}$  fixed at 100 %.

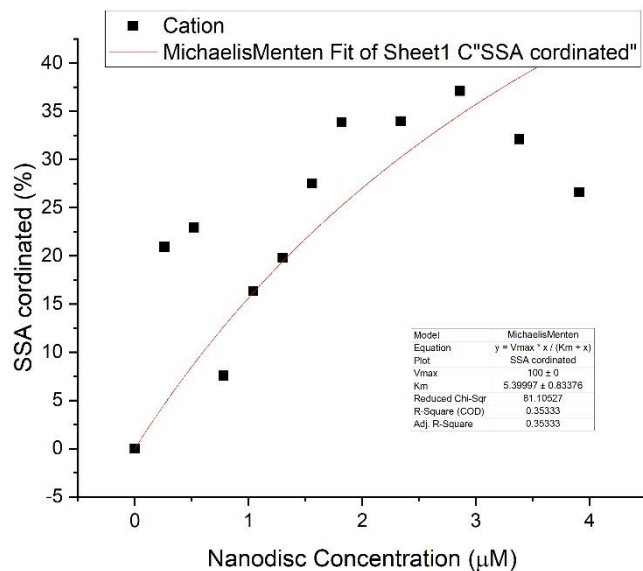

Figure S132 - Graph showing the percentage of SSA 11 cation coordinated to PC nanodiscs, with respect to increasing nanodisc concentration. Data was then fitted to the Michaelis Menten model with  $V_{max}$  fixed at 100 %.

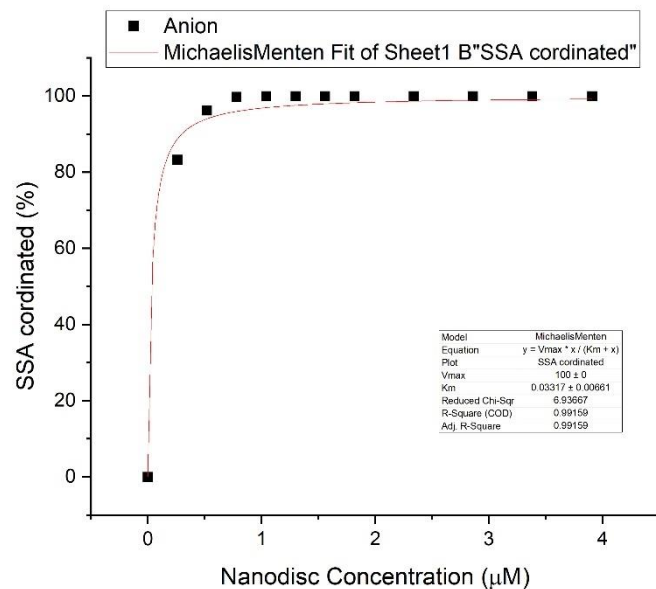

Figure S133 - Graph showing the percentage of SSA 12 anion coordinated to PC nanodiscs, with respect to increasing nanodisc concentration. Data was then fitted to the Michaelis Menten model with  $V_{max}$  fixed at 100 %.

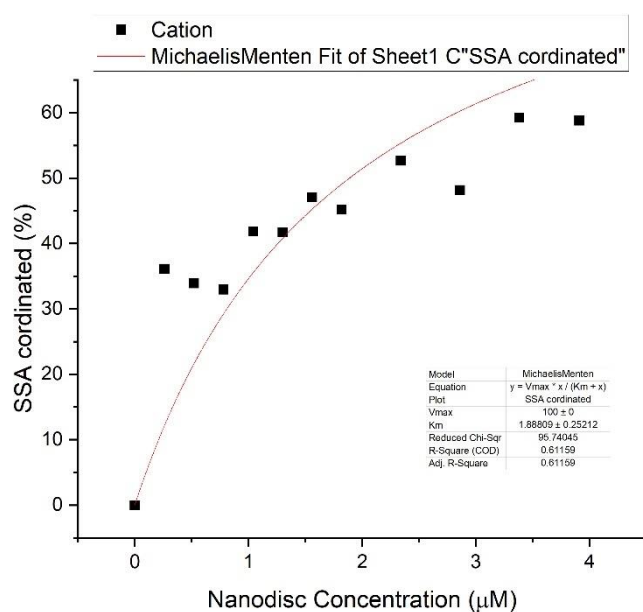

Figure S134 - Graph showing the percentage of SSA 12 cation coordinated to PC nanodiscs, with respect to increasing nanodisc concentration. Data was then fitted to the Michaelis Menten model with  $V_{max}$  fixed at 100 %.

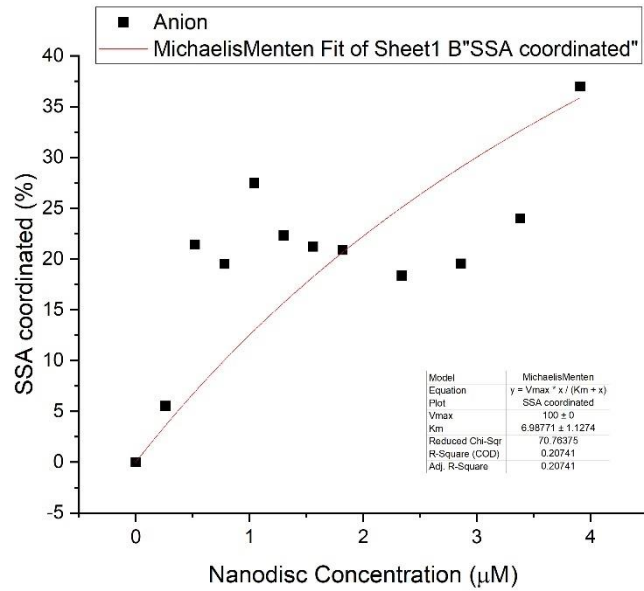

Figure S135 - Graph showing the percentage of SSA 5 anion coordinated to PG nanodiscs, with respect to increasing nanodisc concentration. Data was then fitted to the Michaelis Menten model with  $V_{max}$  fixed at 100 %.

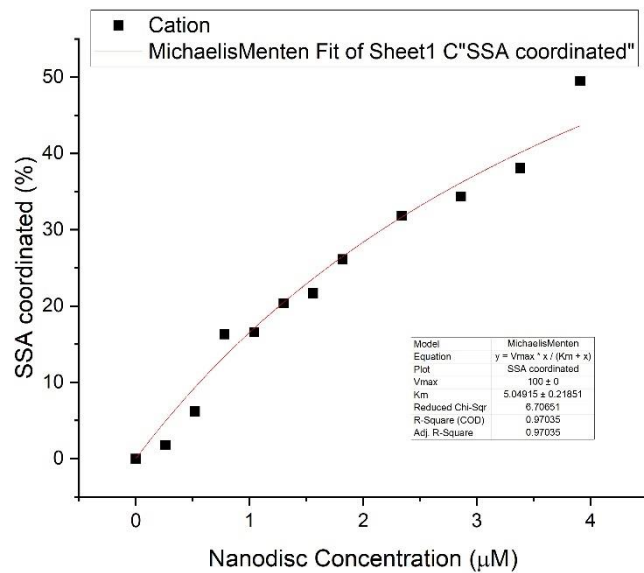

Figure S136 - Graph showing the percentage of SSA 5 cation coordinated to PG nanodiscs, with respect to increasing nanodisc concentration. Data was then fitted to the Michaelis Menten model with  $V_{max}$  fixed at 100 %.



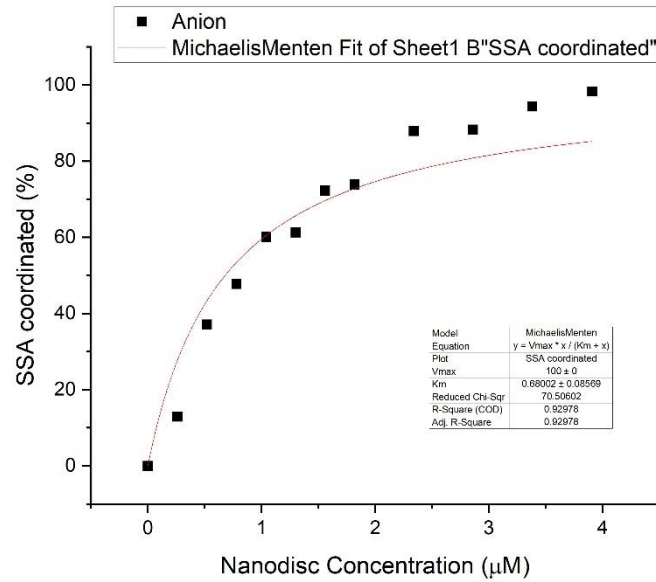

Figure S137 - Graph showing the percentage of SSA 6 anion coordinated to PG nanodiscs, with respect to increasing nanodisc concentration. Data was then fitted to the Michaelis Menten model with  $V_{max}$  fixed at 100 %.

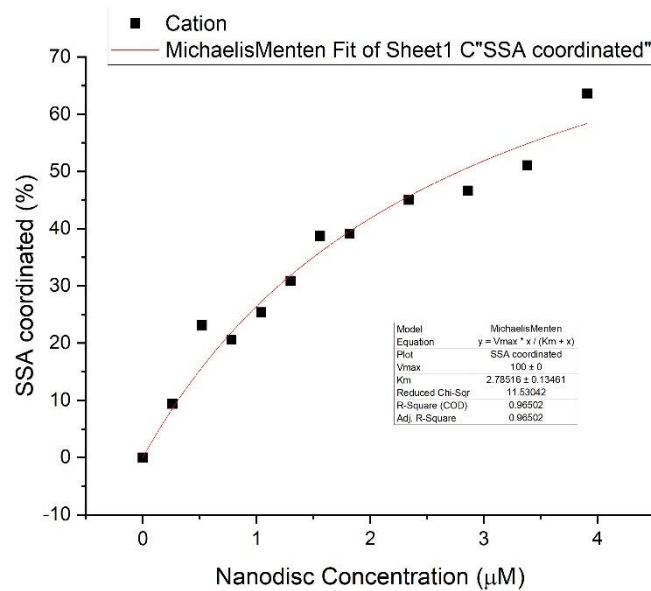

Figure S138 - Graph showing the percentage of SSA 6 cation coordinated to PG nanodiscs, with respect to increasing nanodisc concentration. Data was then fitted to the Michaelis Menten model with  $V_{max}$  fixed at 100 %.

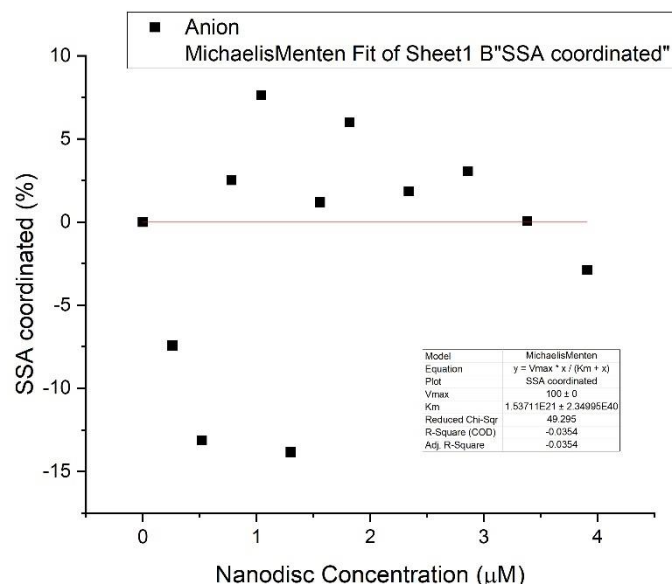

Figure S139 - Graph showing the percentage of SSA 7 anion coordinated to PG nanodiscs, with respect to increasing nanodisc concentration. Data was then fitted to the Michaelis Menten model with  $V_{max}$  fixed at 100 %.

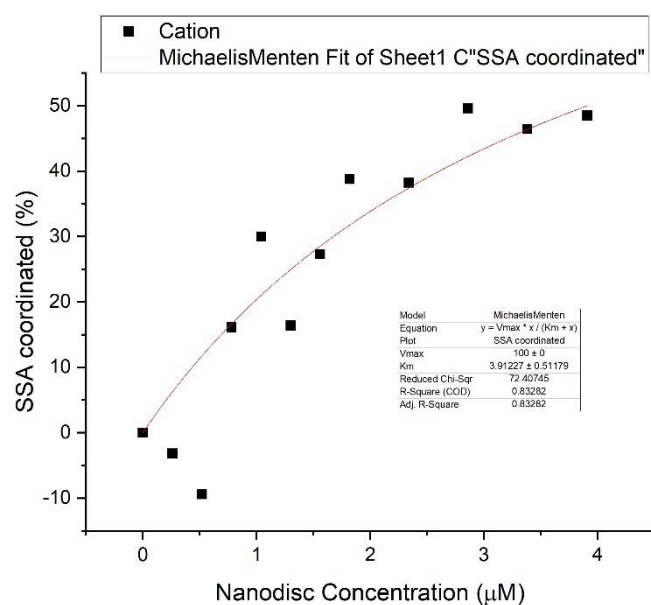

Figure S140 - Graph showing the percentage of SSA 7 cation coordinated to PG nanodiscs, with respect to increasing nanodisc concentration. Data was then fitted to the Michaelis Menten model with  $V_{max}$  fixed at 100 %.

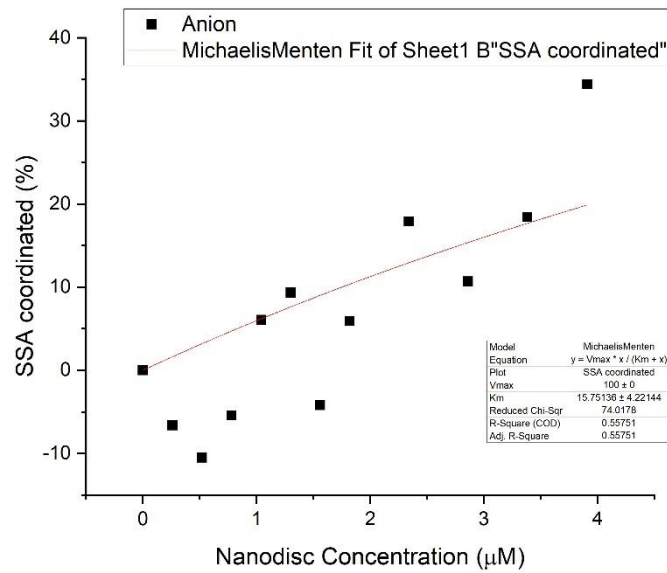

Figure S141 - Graph showing the percentage of SSA 8 anion coordinated to PG nanodiscs, with respect to increasing nanodisc concentration. Data was then fitted to the Michaelis Menten model with  $V_{max}$  fixed at 100 %.

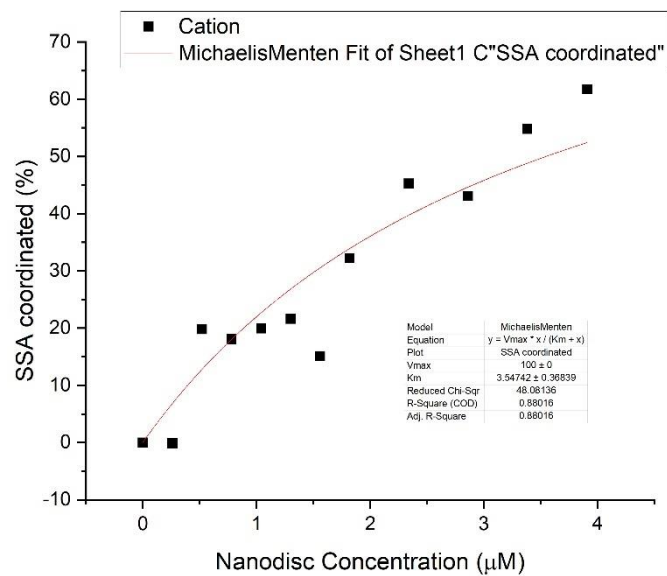

Figure S142 - Graph showing the percentage of SSA 8 cation coordinated to PG nanodiscs, with respect to increasing nanodisc concentration. Data was then fitted to the Michaelis Menten model with  $V_{max}$  fixed at 100 %.

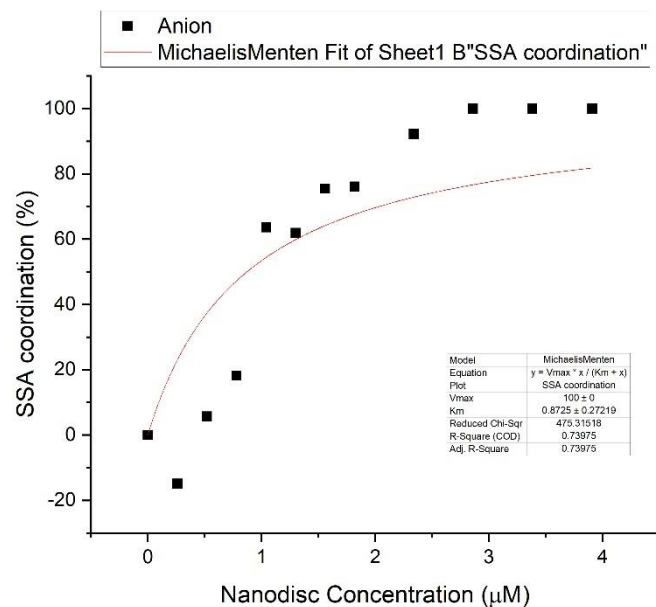

Figure S143 - Graph showing the percentage of SSA 9 anion coordinated to PG nanodiscs, with respect to increasing nanodisc concentration. Data was then fitted to the Michaelis Menten model with  $V_{max}$  fixed at 100 %.

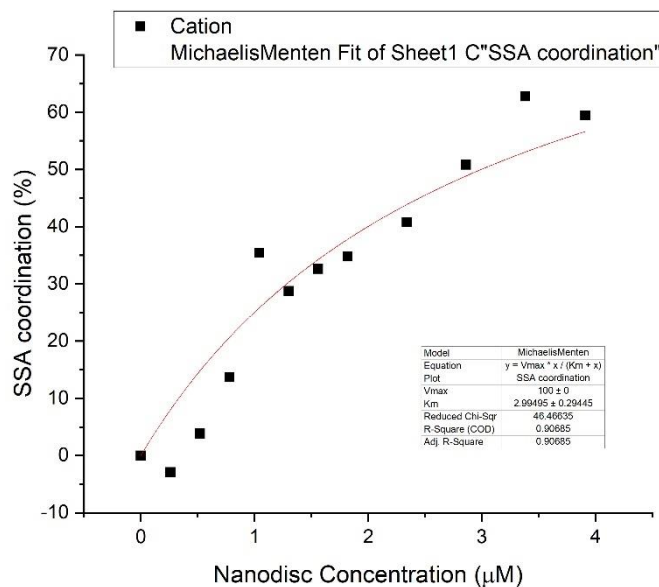

Figure S144 - Graph showing the percentage of SSA 9 cation coordinated to PG nanodiscs, with respect to increasing nanodisc concentration. Data was then fitted to the Michaelis Menten model with  $V_{max}$  fixed at 100 %.

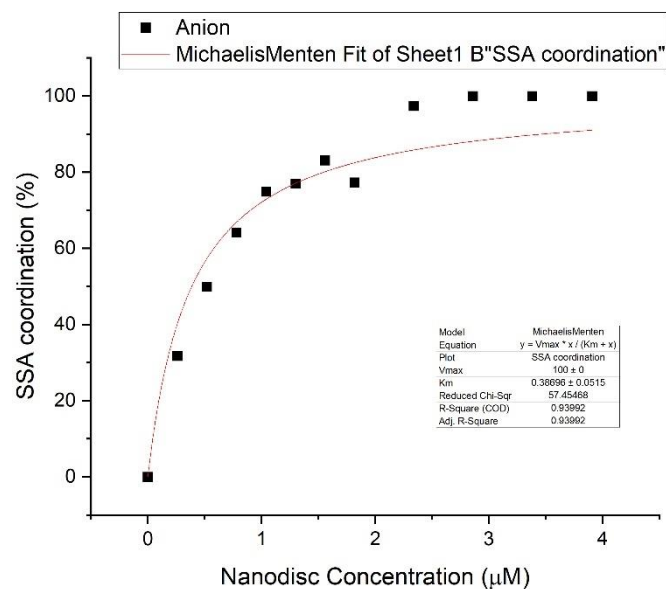

Figure S145 - Graph showing the percentage of SSA 10 anion coordinated to PG nanodiscs, with respect to increasing nanodisc concentration. Data was then fitted to the Michaelis Menten model with  $V_{max}$  fixed at 100 %.

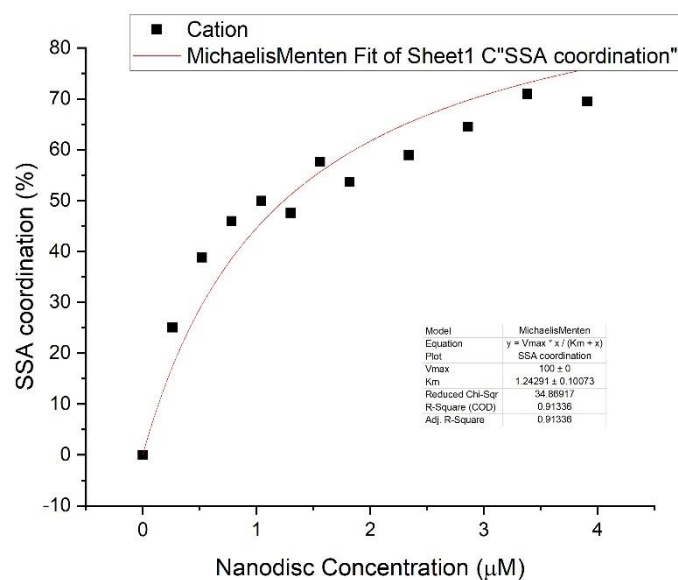

Figure S146 - Graph showing the percentage of SSA 10 cation coordinated to PG nanodiscs, with respect to increasing nanodisc concentration. Data was then fitted to the Michaelis Menten model with  $V_{max}$  fixed at 100 %.

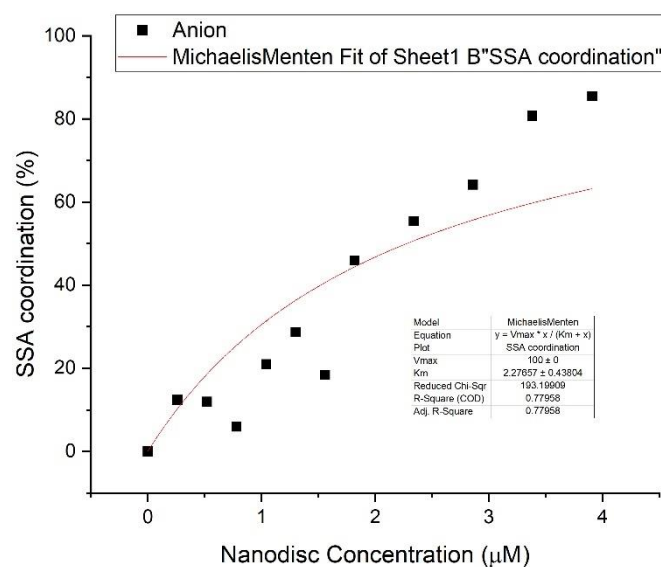

Figure S147 - Graph showing the percentage of SSA **11** anion coordinated to PG nanodiscs, with respect to increasing nanodisc concentration. Data was then fitted to the Michaelis Menten model with  $V_{max}$  fixed at 100 %.

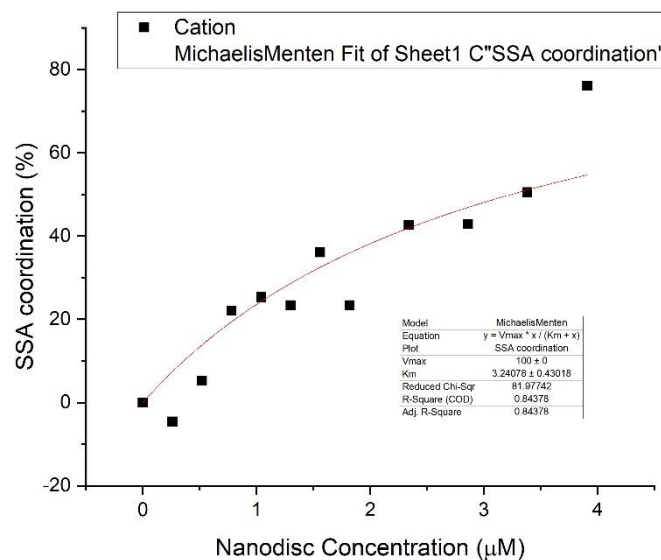

Figure S148 - Graph showing the percentage of SSA **11** cation coordinated to PG nanodiscs, with respect to increasing nanodisc concentration. Data was then fitted to the Michaelis Menten model with  $V_{max}$  fixed at 100 %.

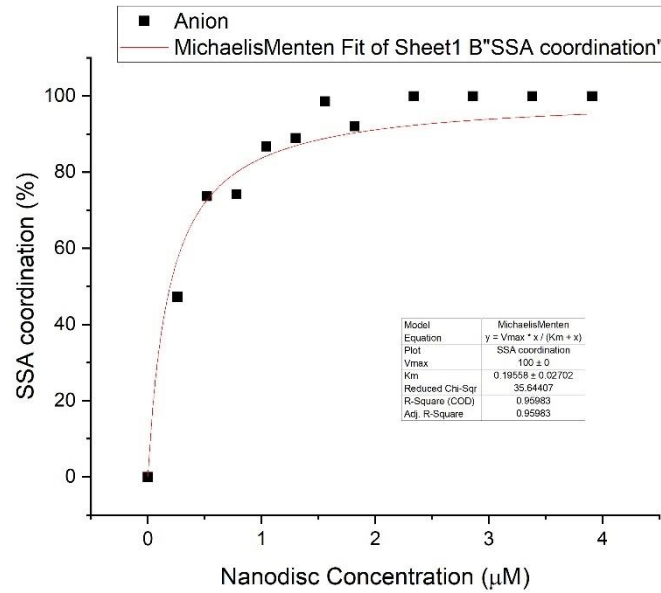

Figure S149 - Graph showing the percentage of SSA **11** anion coordinated to PG nanodiscs, with respect to increasing nanodisc concentration. Data was then fitted to the Michaelis Menten model with  $V_{max}$  fixed at 100 %.

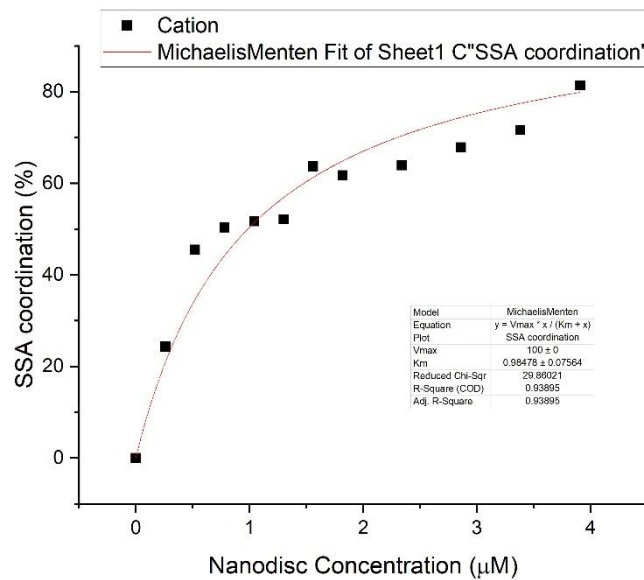

Figure S150 - Graph showing the percentage of SSA **11** cation coordinated to PG nanodiscs, with respect to increasing nanodisc concentration. Data was then fitted to the Michaelis Menten model with  $V_{max}$  fixed at 100 %.

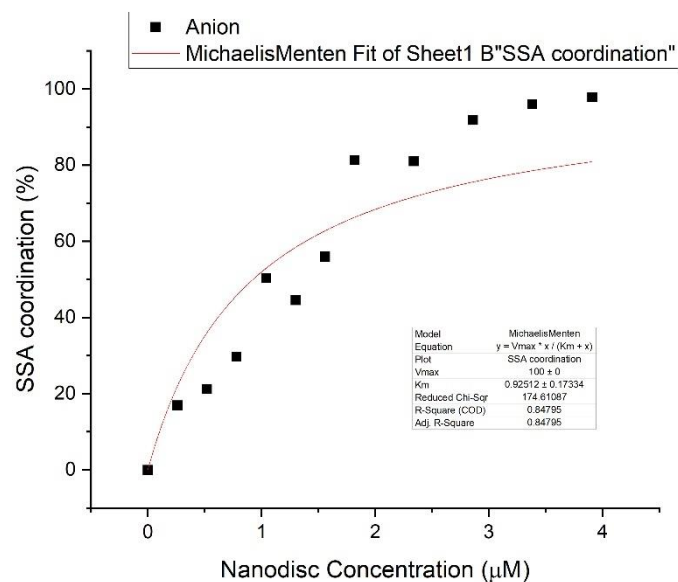

Figure S151 - Graph showing the percentage of SSA 5 anion coordinated to PE:PG 3:1 mix nanodiscs, with respect to increasing nanodisc concentration. Data was then fitted to the Michaelis Menten model with  $V_{max}$  fixed at 100 %.

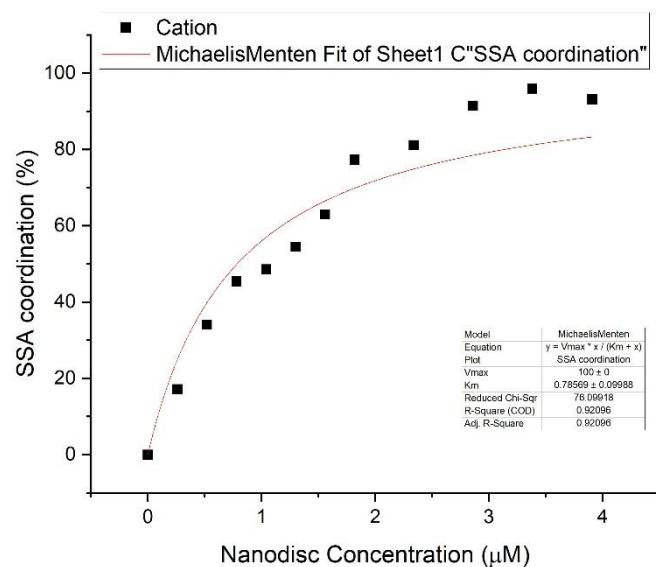

Figure S152 - Graph showing the percentage of SSA 5 cation coordinated to PE:PG 3:1 mix nanodiscs, with respect to increasing nanodisc concentration. Data was then fitted to the Michaelis Menten model with  $V_{max}$  fixed at 100 %.



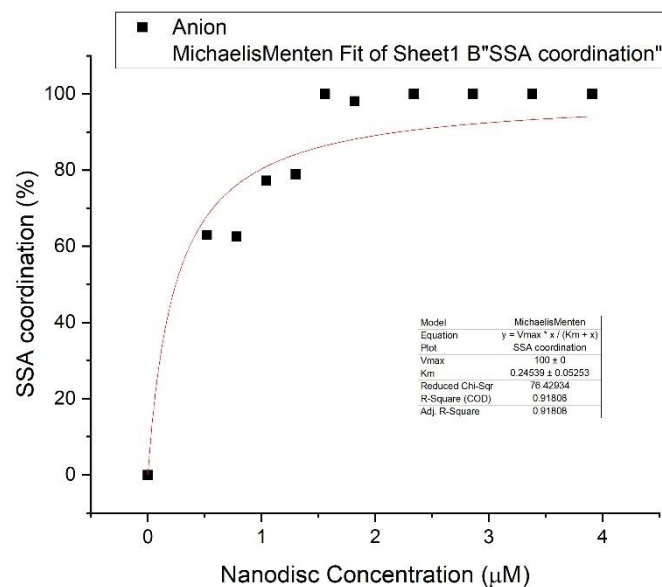

Figure S153 - Graph showing the percentage of SSA 6 anion coordinated to PE:PG 3:1 mix nanodiscs, with respect to increasing nanodisc concentration. Data was then fitted to the Michaelis Menten model with  $V_{max}$  fixed at 100 %.

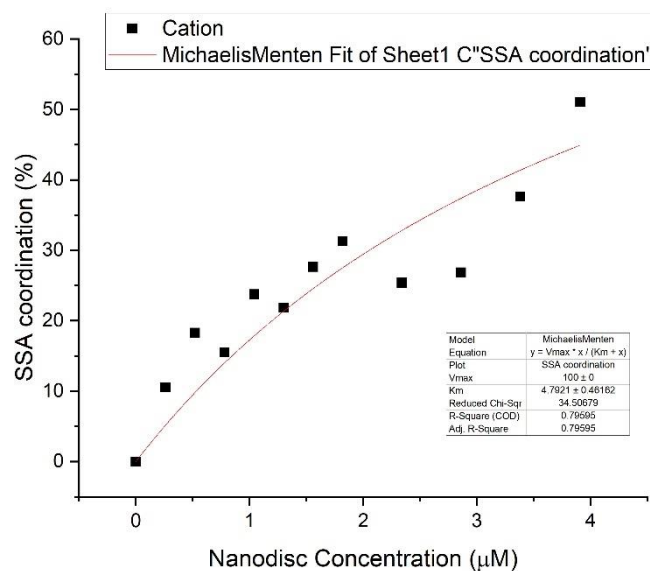

Figure S154 - Graph showing the percentage of SSA 6 cation coordinated to PE:PG 3:1 mix nanodiscs, with respect to increasing nanodisc concentration. Data was then fitted to the Michaelis Menten model with  $V_{max}$  fixed at 100 %.

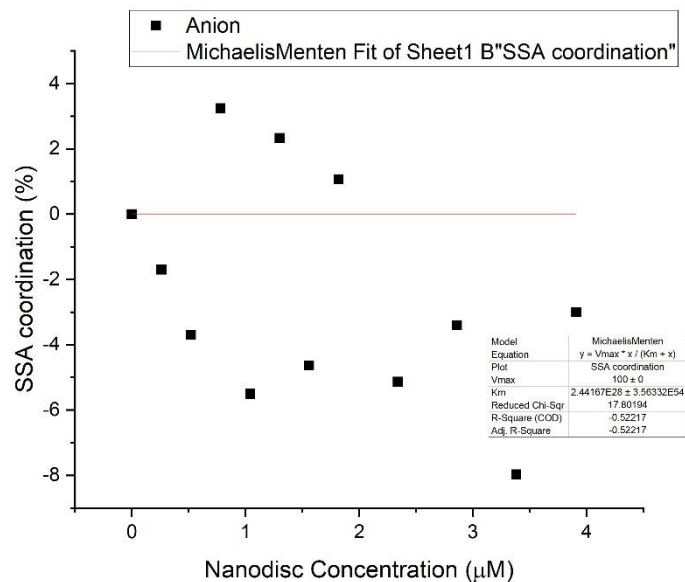

Figure S155 - Graph showing the percentage of SSA 7 anion coordinated to PE:PG 3:1 mix nanodiscs, with respect to increasing nanodisc concentration. Data was then fitted to the Michaelis Menten model with  $V_{max}$  fixed at 100 %.

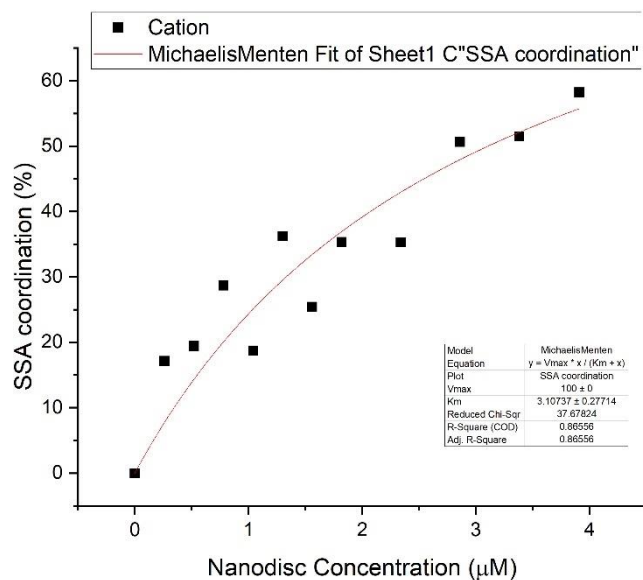

Figure S156 - Graph showing the percentage of SSA 7 cation coordinated to PE:PG 3:1 mix nanodiscs, with respect to increasing nanodisc concentration. Data was then fitted to the Michaelis Menten model with  $V_{max}$  fixed at 100 %.

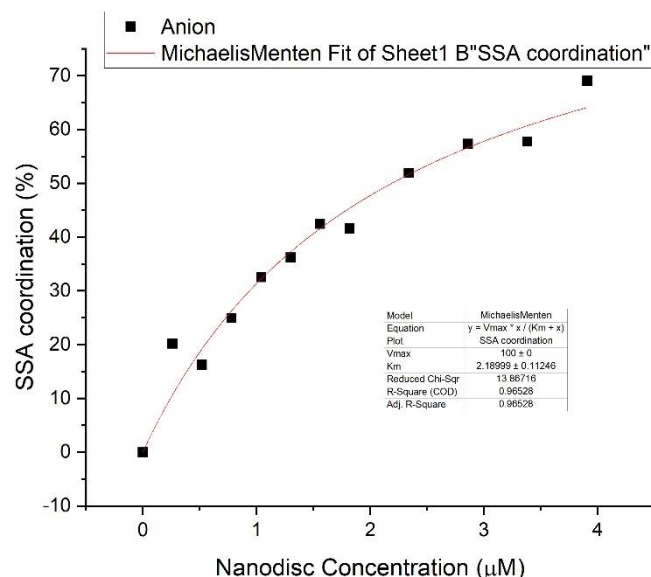

Figure S157 - Graph showing the percentage of SSA **8** anion coordinated to PE:PG 3:1 mix nanodiscs, with respect to increasing nanodisc concentration. Data was then fitted to the Michaelis Menten model with  $V_{max}$  fixed at 100 %.

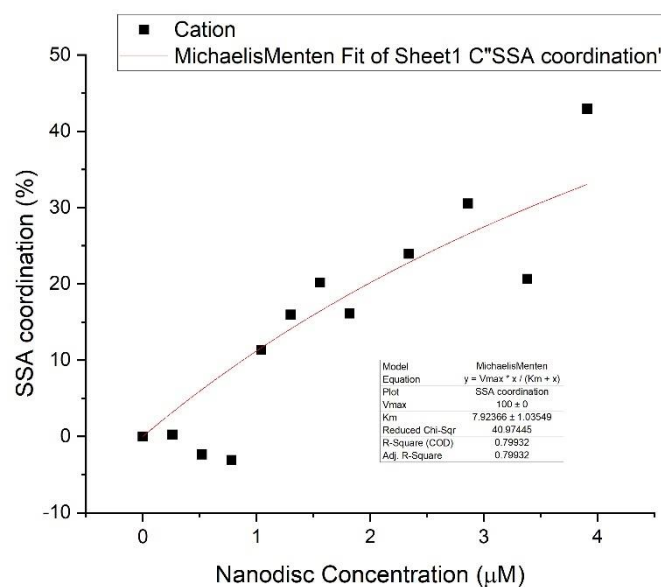

Figure S158 - Graph showing the percentage of SSA **8** cation coordinated to PE:PG 3:1 mix nanodiscs, with respect to increasing nanodisc concentration. Data was then fitted to the Michaelis Menten model with  $V_{max}$  fixed at 100 %.

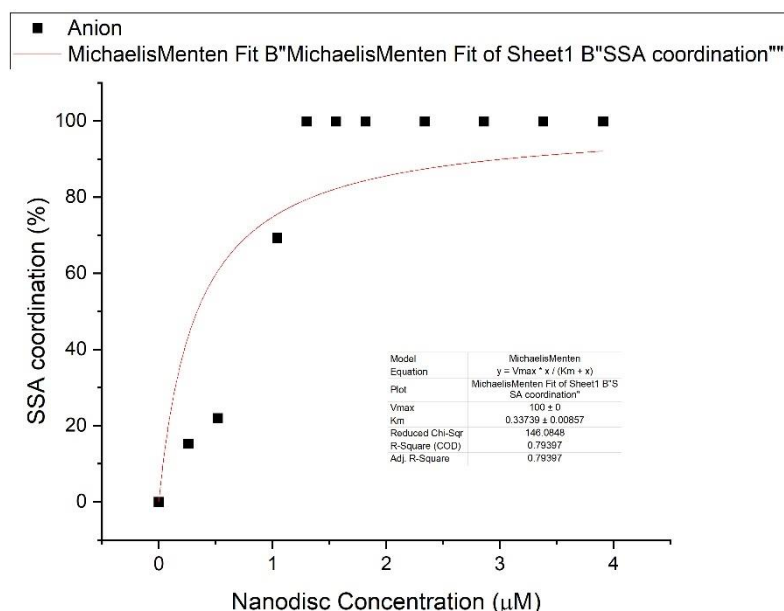

Figure S159 - Graph showing the percentage of SSA 9 anion coordinated to PE:PG 3:1 mix nanodiscs, with respect to increasing nanodisc concentration. Data was then fitted to the Michaelis Menten model with  $V_{max}$  fixed at 100 %.

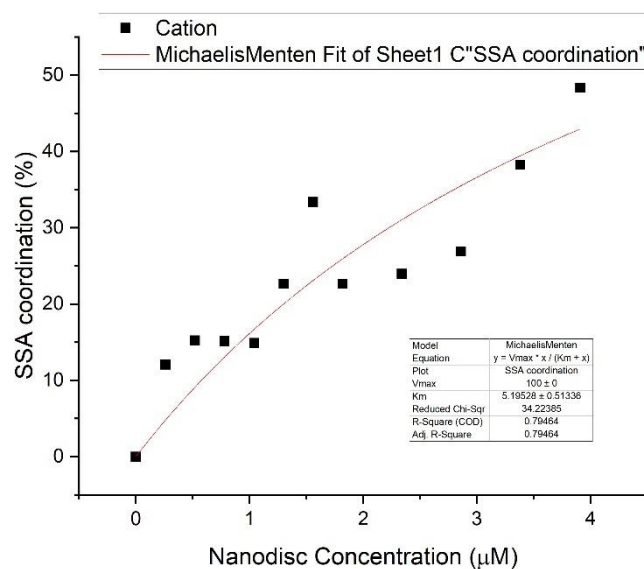

Figure S160 - Graph showing the percentage of SSA 9 cation coordinated to PE:PG 3:1 mix nanodiscs, with respect to increasing nanodisc concentration. Data was then fitted to the Michaelis Menten model with  $V_{max}$  fixed at 100 %.

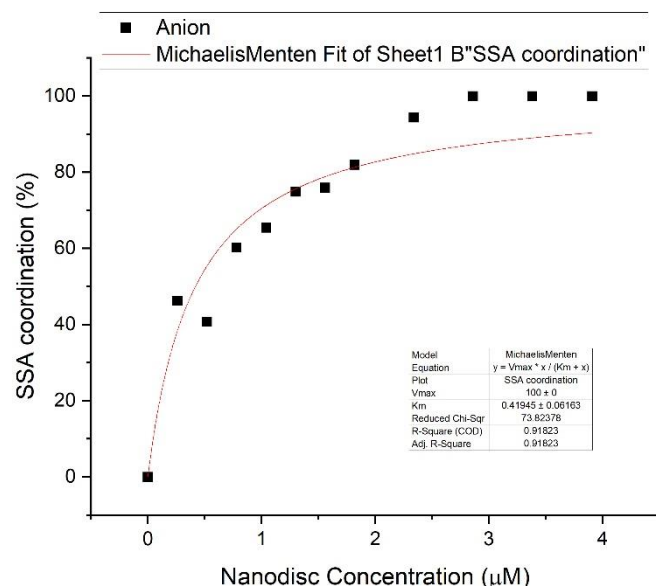

Figure S161 - Graph showing the percentage of SSA 10 anion coordinated to PE:PG 3:1 mix nanodiscs, with respect to increasing nanodisc concentration. Data was then fitted to the Michaelis Menten model with  $V_{max}$  fixed at 100 %.

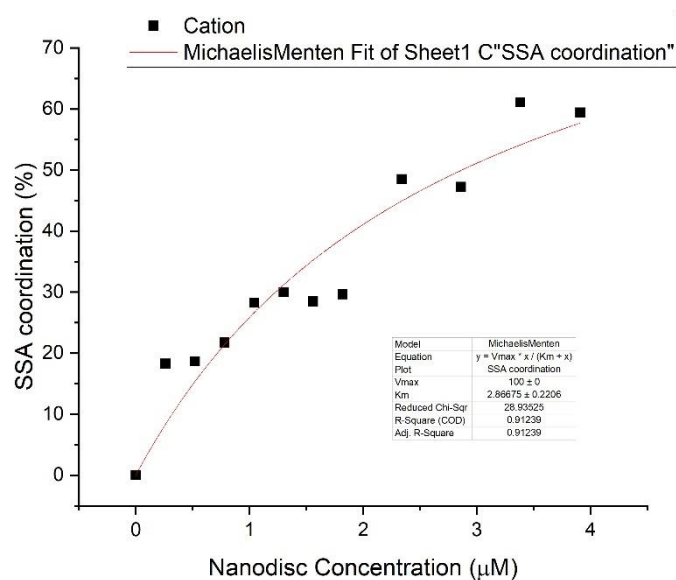

Figure S162 - Graph showing the percentage of SSA 10 cation coordinated to PE:PG 3:1 mix nanodiscs, with respect to increasing nanodisc concentration. Data was then fitted to the Michaelis Menten model with  $V_{max}$  fixed at 100 %.

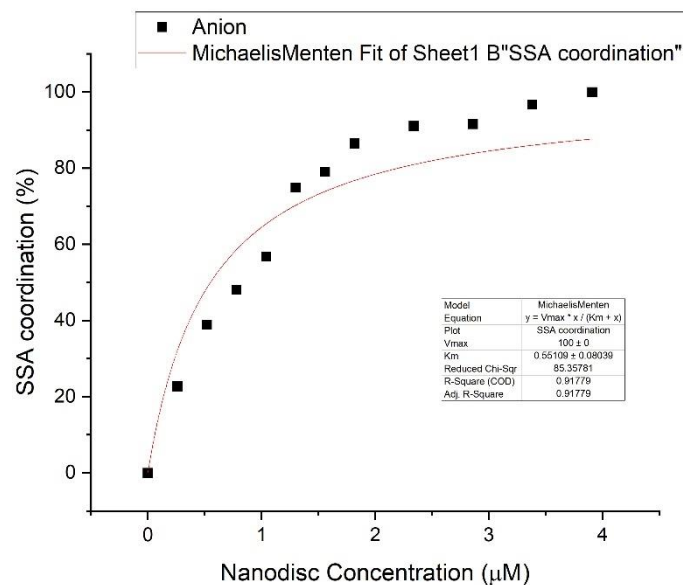

Figure S163 - Graph showing the percentage of SSA 11 anion coordinated to PE:PG 3:1 mix nanodiscs, with respect to increasing nanodisc concentration. Data was then fitted to the Michaelis Menten model with  $V_{max}$  fixed at 100 %.

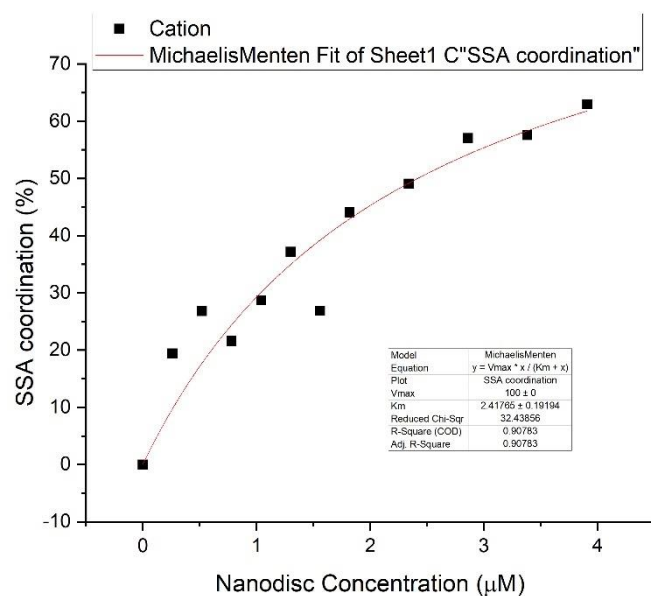

Figure S164 - Graph showing the percentage of SSA 11 cation coordinated to PE:PG 3:1 mix nanodiscs, with respect to increasing nanodisc concentration. Data was then fitted to the Michaelis Menten model with  $V_{max}$  fixed at 100 %.

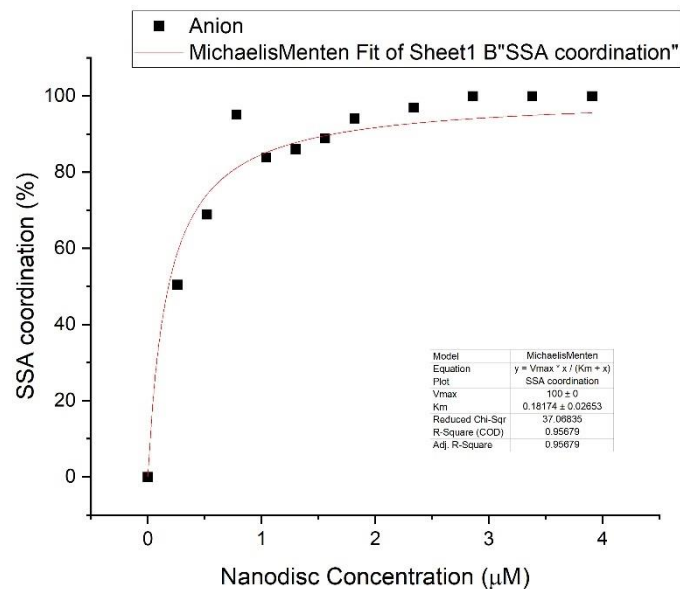

Figure S165 - Graph showing the percentage of SSA **12** anion coordinated to PE:PG 3:1 mix nanodiscs, with respect to increasing nanodisc concentration. Data was then fitted to the Michaelis Menten model with  $V_{max}$  fixed at 100 %.

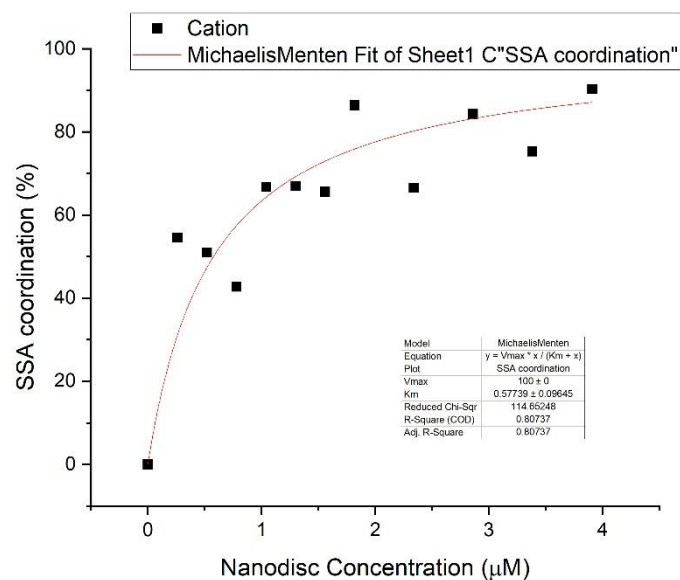

Figure S166 - Graph showing the percentage of SSA **12** cation coordinated to PE:PG 3:1 mix nanodiscs, with respect to increasing nanodisc concentration. Data was then fitted to the Michaelis Menten model with  $V_{max}$  fixed at 100 %.

## Hill Plot fits

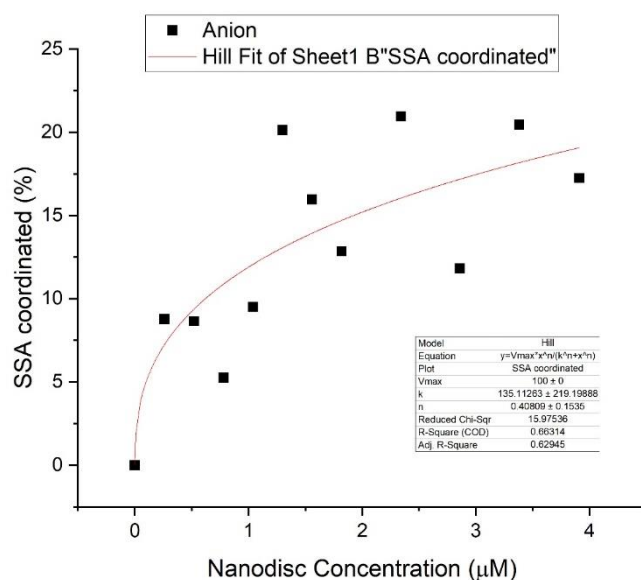

Figure S167 - Graph showing the percentage of SSA 5 anion coordinated to PC nanodiscs, with respect to increasing nanodisc concentration. Data was then fitted to the Hill model with  $V_{max}$  fixed at 100 %.

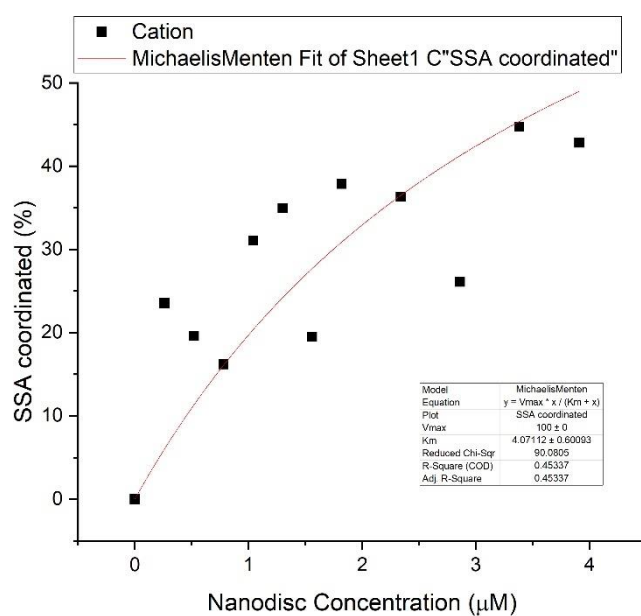

Figure S168 - Graph showing the percentage of SSA 5 cation coordinated to PC nanodiscs, with respect to increasing nanodisc concentration. Data was then fitted to the Hill model with  $V_{max}$  fixed at 100 %.



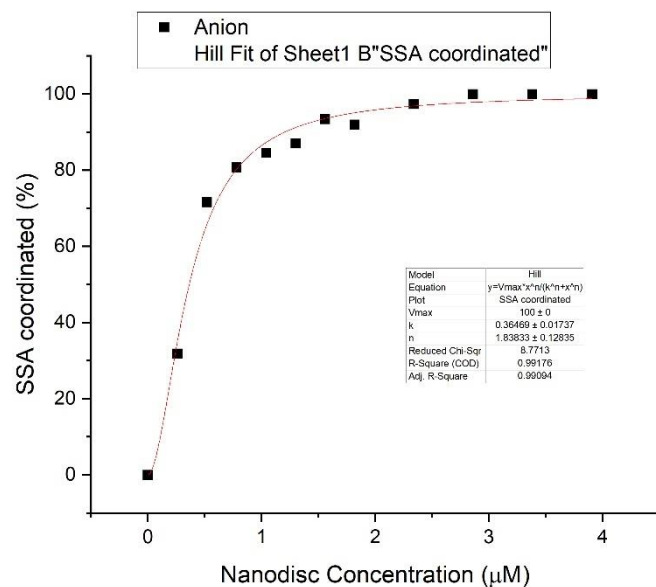

Figure S169 - Graph showing the percentage of SSA 6 anion coordinated to PC nanodiscs, with respect to increasing nanodisc concentration. Data was then fitted to the Hill model with  $V_{max}$  fixed at 100 %.

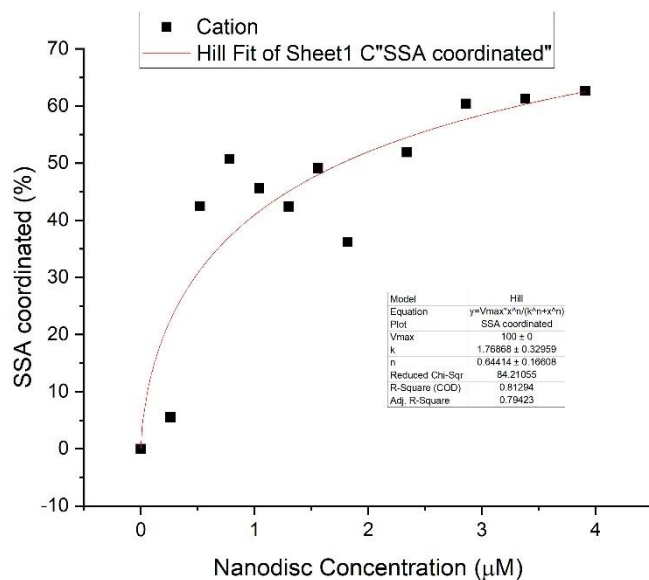

Figure S170 - Graph showing the percentage of SSA 6 cation coordinated to PC nanodiscs, with respect to increasing nanodisc concentration. Data was then fitted to the Hill model with  $V_{max}$  fixed at 100 %.

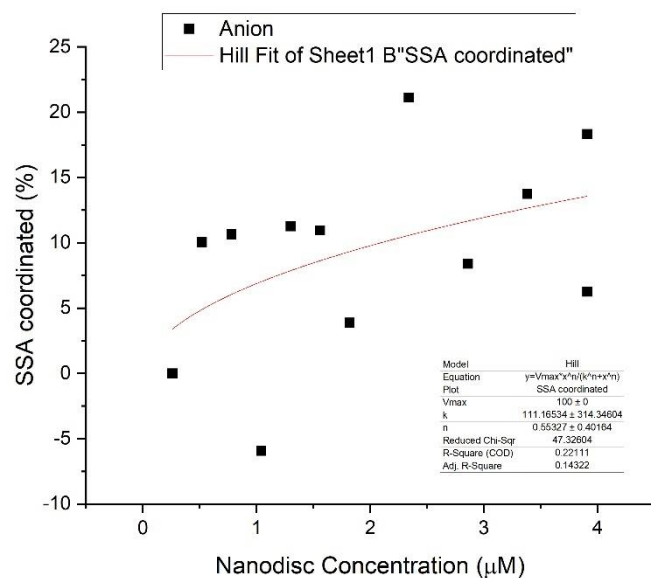

Figure S171 - Graph showing the percentage of SSA 7 anion coordinated to PC nanodiscs, with respect to increasing nanodisc concentration. Data was then fitted to the Hill model with  $V_{max}$  fixed at 100 %.

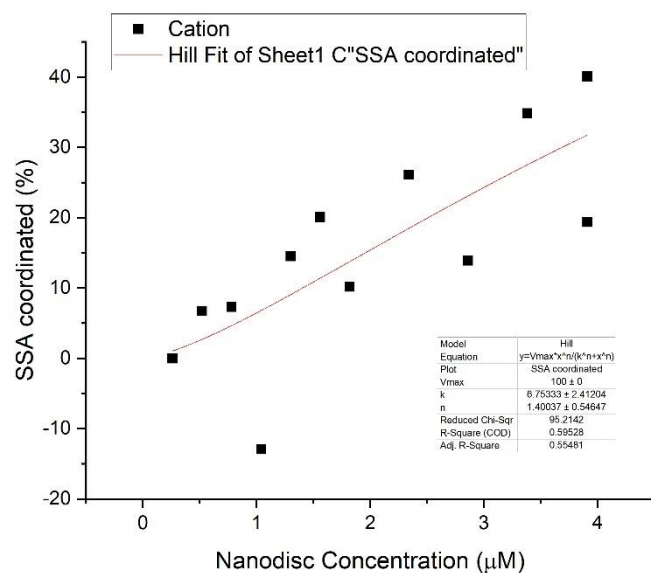

Figure S172 - Graph showing the percentage of SSA 7 cation coordinated to PC nanodiscs, with respect to increasing nanodisc concentration. Data was then fitted to the Hill model with  $V_{max}$  fixed at 100 %.

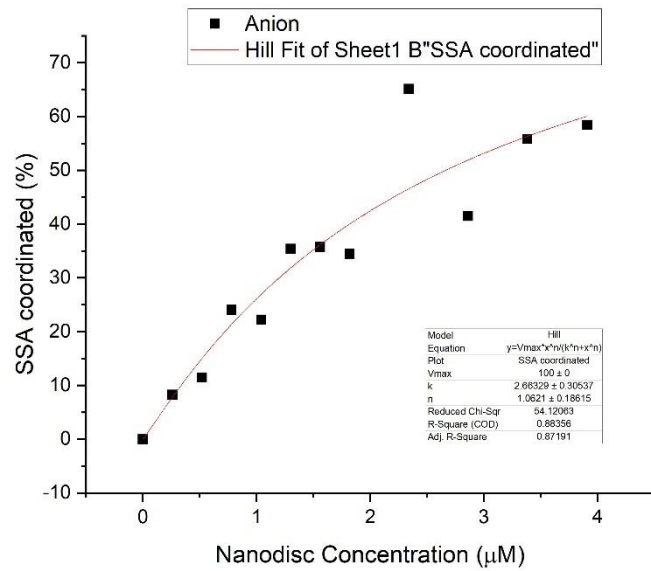

Figure S173 - Graph showing the percentage of SSA 8 anion coordinated to PC nanodiscs, with respect to increasing nanodisc concentration. Data was then fitted to the Hill model with  $V_{max}$  fixed at 100 %.

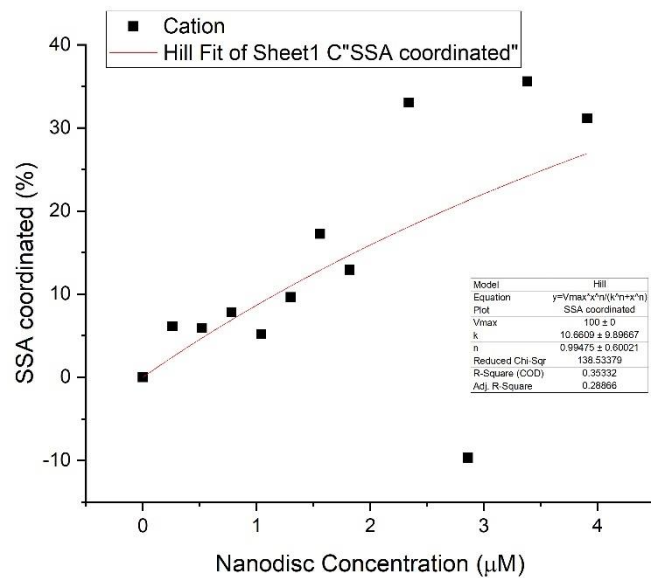

Figure S174 - Graph showing the percentage of SSA 8 cation coordinated to PC nanodiscs, with respect to increasing nanodisc concentration. Data was then fitted to the Hill model with  $V_{max}$  fixed at 100 %.

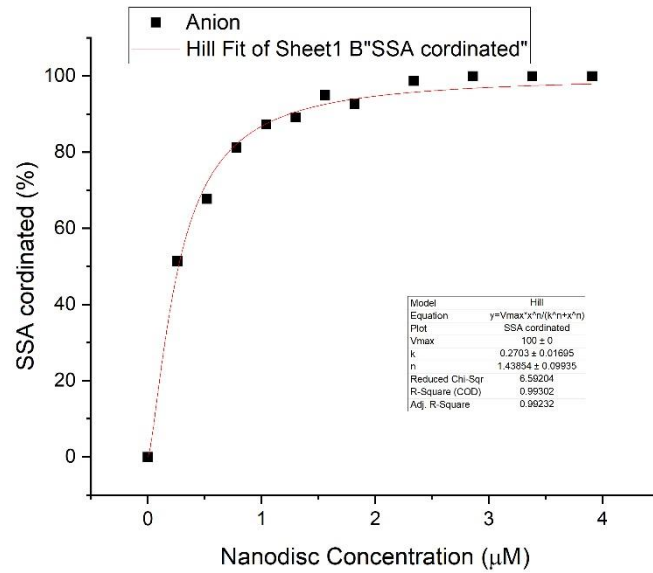

Figure S175 - Graph showing the percentage of SSA 9 anion coordinated to PC nanodiscs, with respect to increasing nanodisc concentration. Data was then fitted to the Hill model with  $V_{max}$  fixed at 100 %.

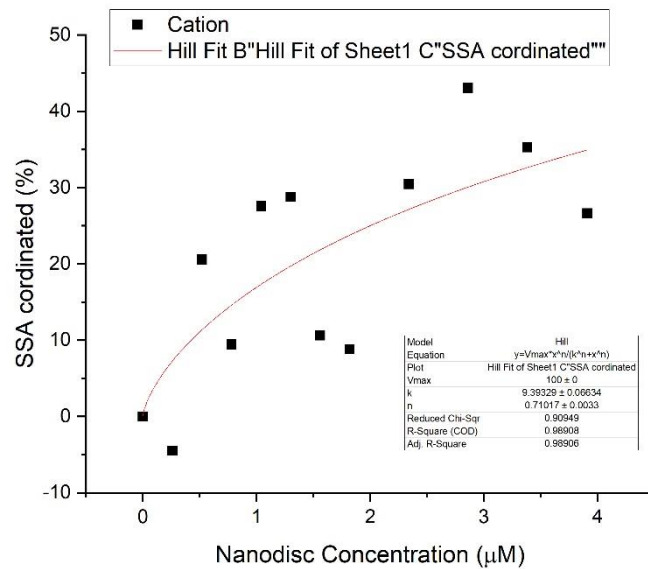

Figure S176 - Graph showing the percentage of SSA 9 cation coordinated to PC nanodiscs, with respect to increasing nanodisc concentration. Data was then fitted to the Hill model with  $V_{max}$  fixed at 100 %.

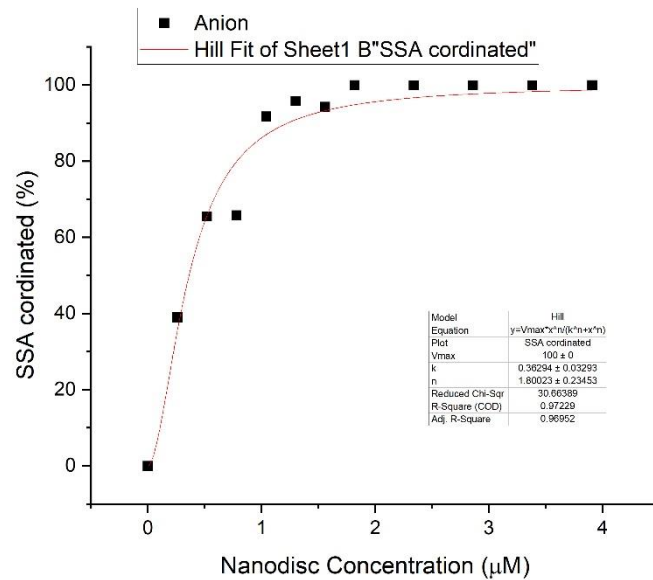

Figure S177 - Graph showing the percentage of SSA **10** anion coordinated to PC nanodiscs, with respect to increasing nanodisc concentration. Data was then fitted to the Hill model with  $V_{max}$  fixed at 100 %.

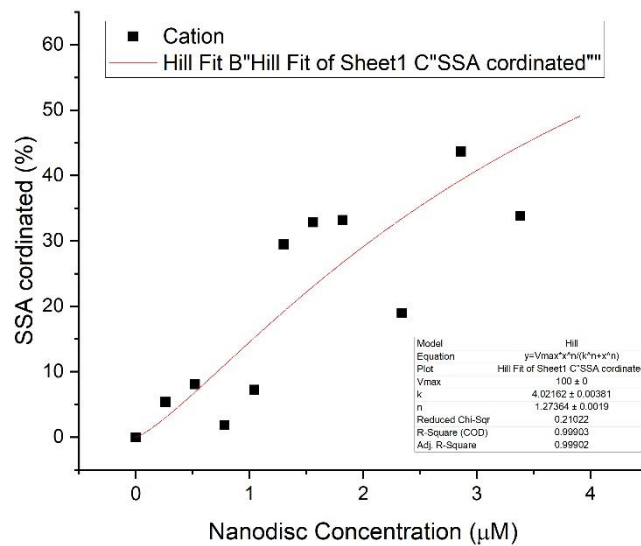

Figure S178 - Graph showing the percentage of SSA **10** cation coordinated to PC nanodiscs, with respect to increasing nanodisc concentration. Data was then fitted to the Hill model with  $V_{max}$  fixed at 100 %.

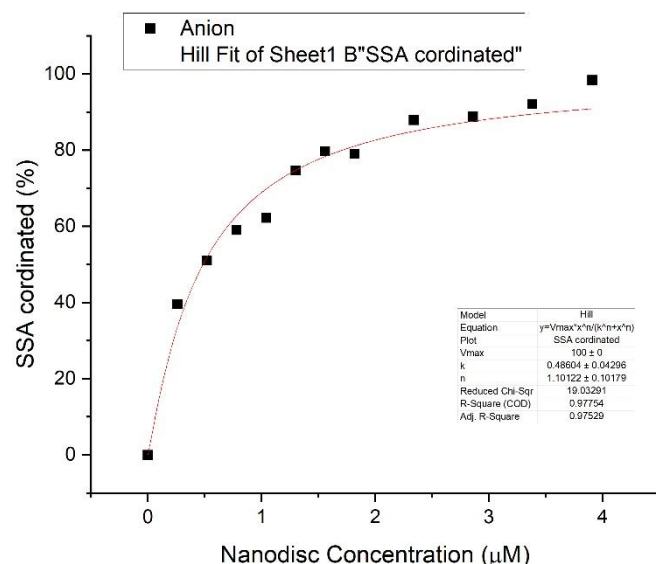

Figure S179 - Graph showing the percentage of SSA 11 anion coordinated to PC nanodiscs, with respect to increasing nanodisc concentration. Data was then fitted to the Hill model with  $V_{max}$  fixed at 100 %.

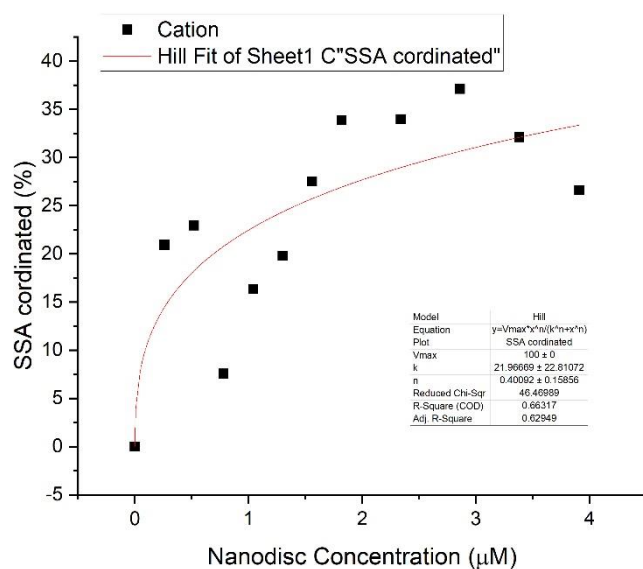

Figure S180 - Graph showing the percentage of SSA 11 cation coordinated to PC nanodiscs, with respect to increasing nanodisc concentration. Data was then fitted to the Hill model with  $V_{max}$  fixed at 100 %.

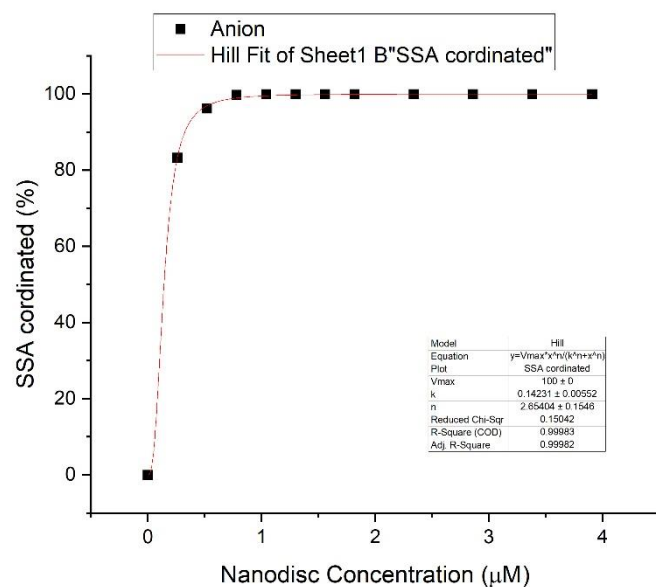

Figure S181 - Graph showing the percentage of SSA **12** anion coordinated to PC nanodiscs, with respect to increasing nanodisc concentration. Data was then fitted to the Hill model with  $V_{max}$  fixed at 100 %.

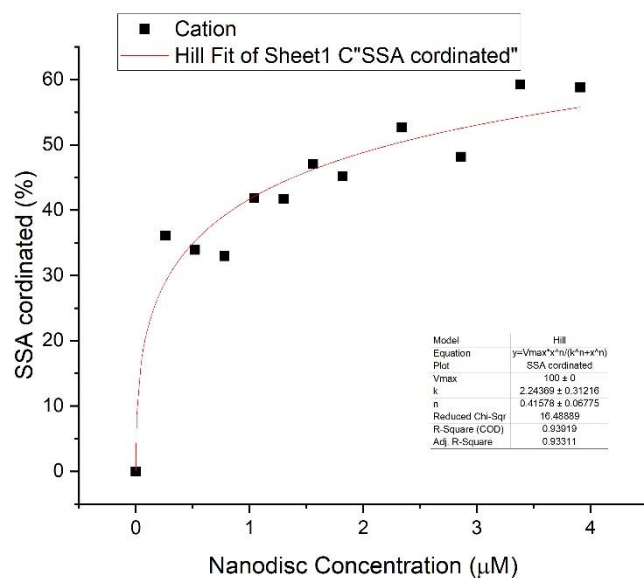

Figure S182 - Graph showing the percentage of SSA **12** cation coordinated to PC nanodiscs, with respect to increasing nanodisc concentration. Data was then fitted to the Hill model with  $V_{max}$  fixed at 100 %.

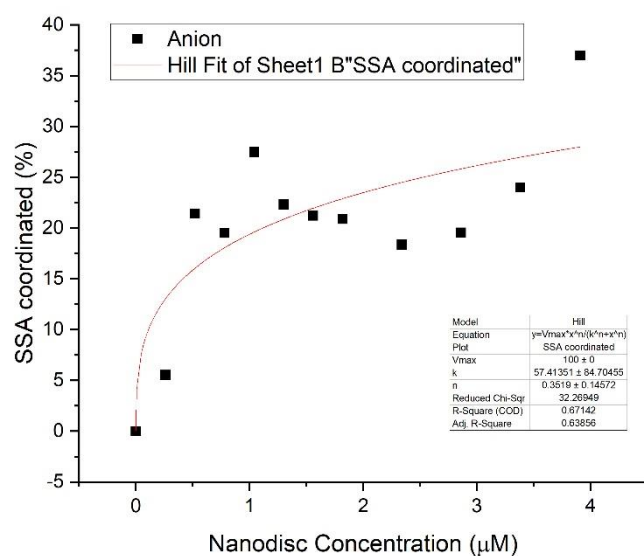

Figure S183 - Graph showing the percentage of SSA 5 anion coordinated to PG nanodiscs, with respect to increasing nanodisc concentration. Data was then fitted to the Hill model with  $V_{max}$  fixed at 100 %.

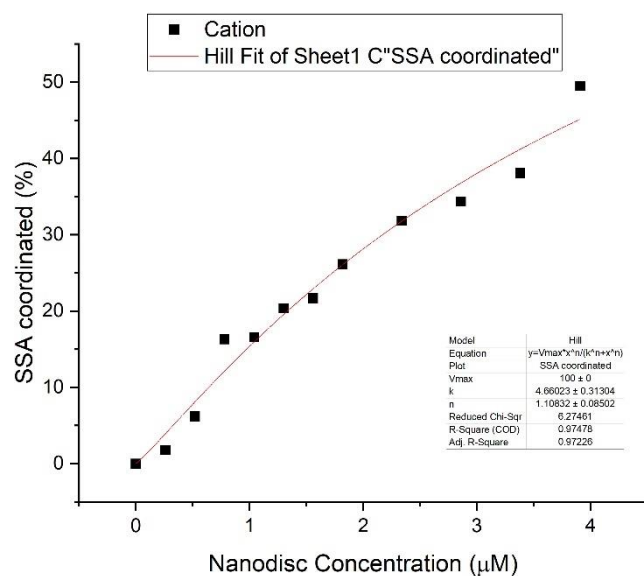

Figure S184 - Graph showing the percentage of SSA 5 cation coordinated to PG nanodiscs, with respect to increasing nanodisc concentration. Data was then fitted to the Hill model with  $V_{max}$  fixed at 100 %.



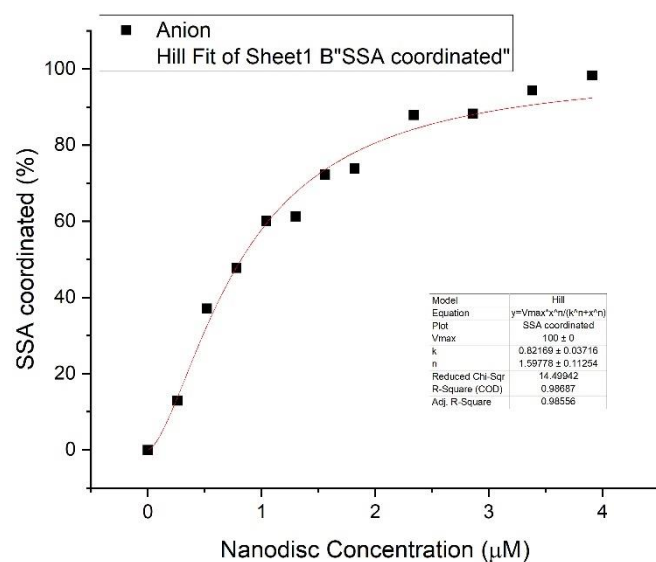

Figure S185 - Graph showing the percentage of SSA 6 anion coordinated to PG nanodiscs, with respect to increasing nanodisc concentration. Data was then fitted to the Hill model with  $V_{max}$  fixed at 100 %.

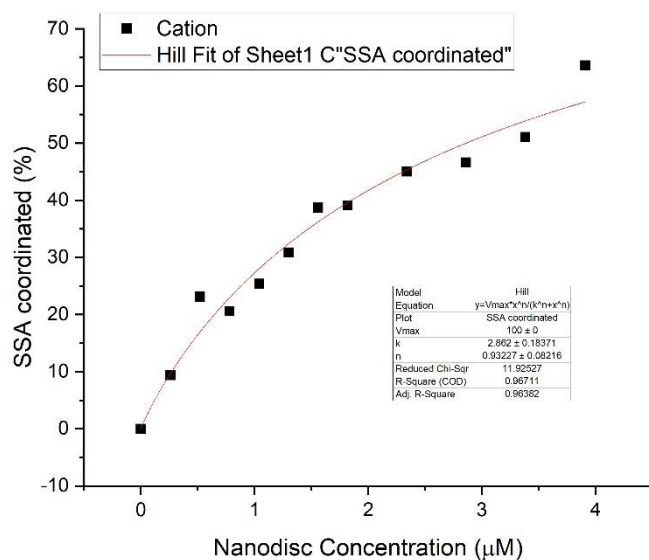

Figure S186 - Graph showing the percentage of SSA 6 cation coordinated to PG nanodiscs, with respect to increasing nanodisc concentration. Data was then fitted to the Hill model with  $V_{max}$  fixed at 100 %.

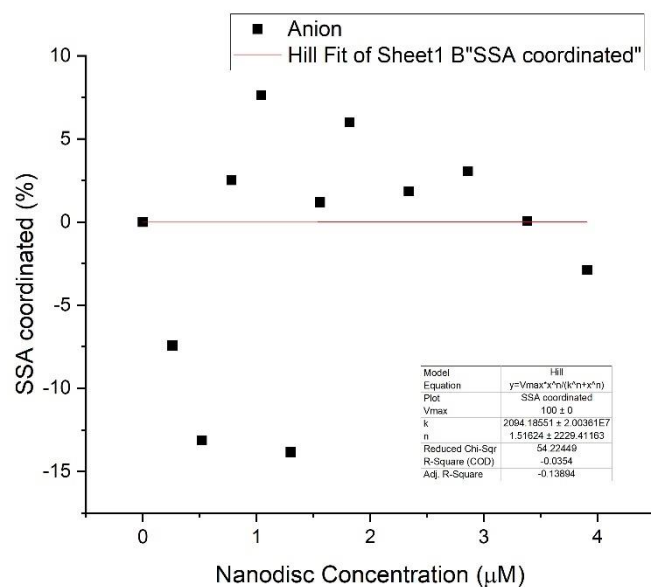

Figure S187 - Graph showing the percentage of SSA 7 anion coordinated to PG nanodiscs, with respect to increasing nanodisc concentration. Data was then fitted to the Hill model with  $V_{max}$  fixed at 100 %.

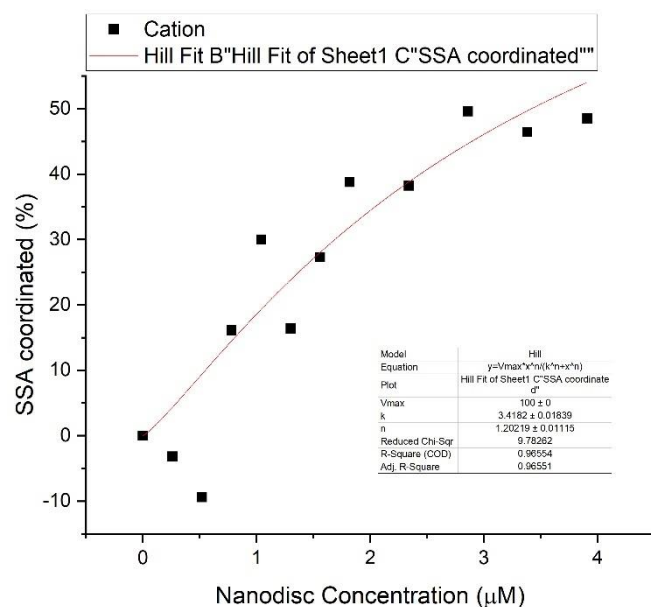

Figure S188 - Graph showing the percentage of SSA 7 cation coordinated to PG nanodiscs, with respect to increasing nanodisc concentration. Data was then fitted to the Hill model with  $V_{max}$  fixed at 100 %.

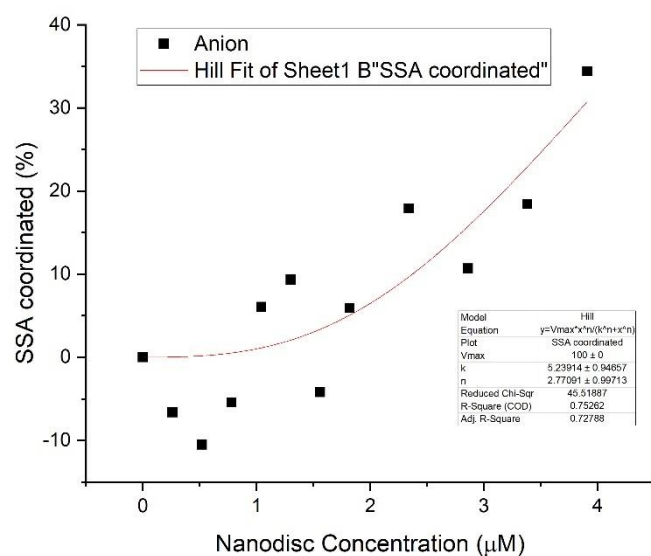

Figure S189 - Graph showing the percentage of SSA 8 anion coordinated to PG nanodiscs, with respect to increasing nanodisc concentration. Data was then fitted to the Hill model with  $V_{max}$  fixed at 100 %.

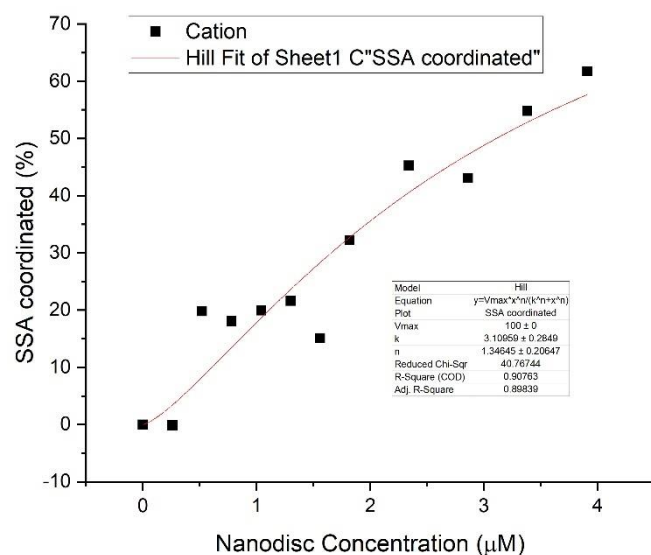

Figure S190 - Graph showing the percentage of SSA 8 cation coordinated to PG nanodiscs, with respect to increasing nanodisc concentration. Data was then fitted to the Hill model with  $V_{max}$  fixed at 100 %.

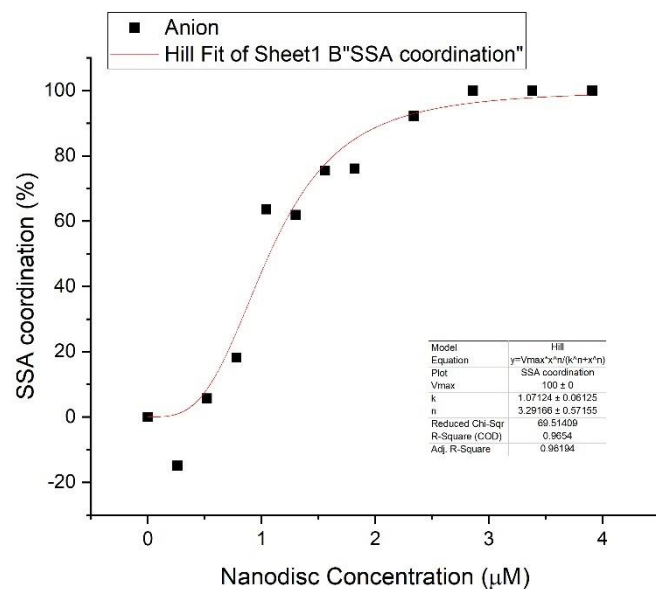

Figure S191 - Graph showing the percentage of SSA 9 anion coordinated to PG nanodiscs, with respect to increasing nanodisc concentration. Data was then fitted to the Hill model with  $V_{max}$  fixed at 100 %.

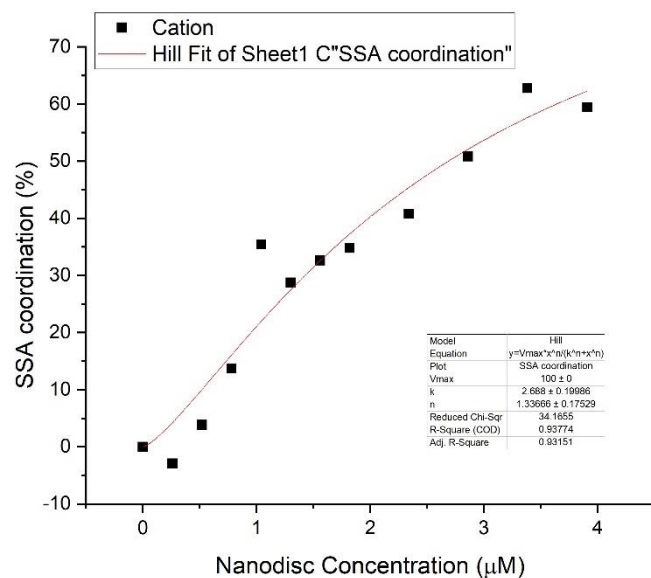

Figure S192 - Graph showing the percentage of SSA 9 cation coordinated to PG nanodiscs, with respect to increasing nanodisc concentration. Data was then fitted to the Hill model with  $V_{max}$  fixed at 100 %.

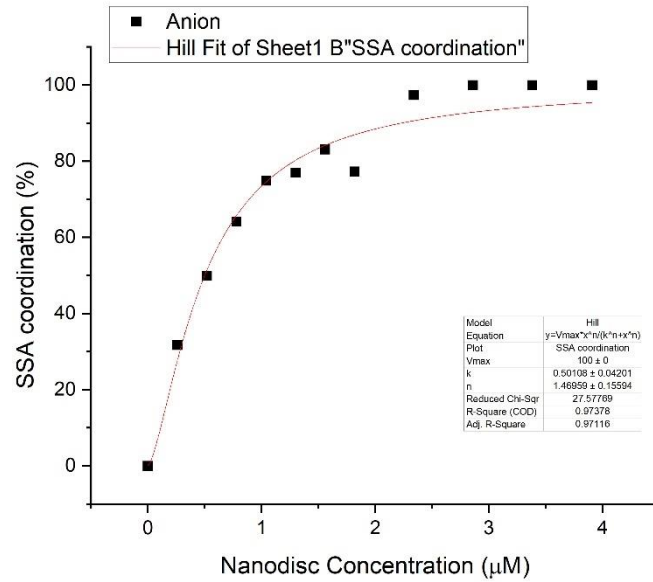

Figure S193 - Graph showing the percentage of SSA **10** anion coordinated to PG nanodiscs, with respect to increasing nanodisc concentration. Data was then fitted to the Hill model with  $V_{max}$  fixed at 100 %.

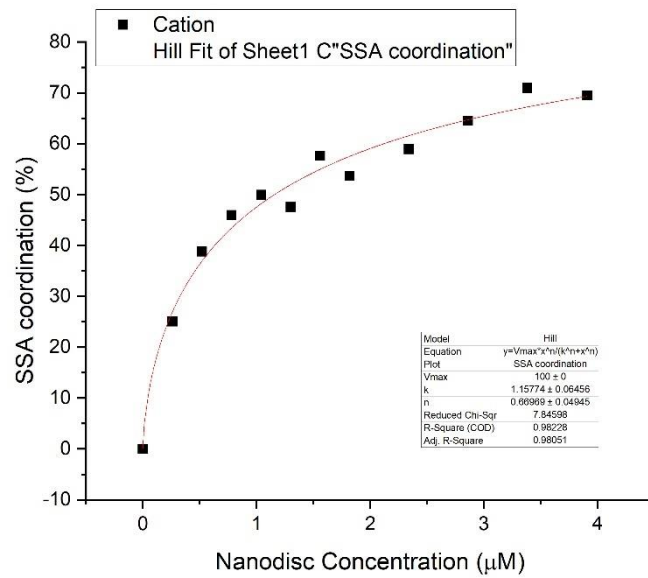

Figure S194 - Graph showing the percentage of SSA **10** cation coordinated to PG nanodiscs, with respect to increasing nanodisc concentration. Data was then fitted to the Hill model with  $V_{max}$  fixed at 100 %.

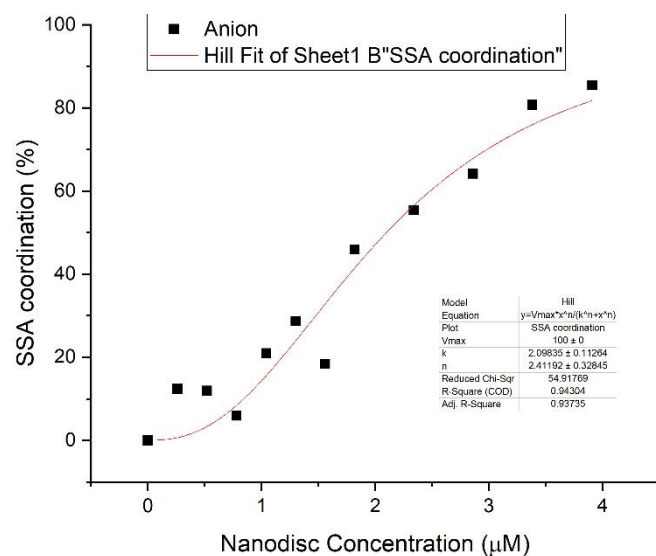

Figure S195 - Graph showing the percentage of SSA 11 anion coordinated to PG nanodiscs, with respect to increasing nanodisc concentration. Data was then fitted to the Hill model with  $V_{max}$  fixed at 100 %.

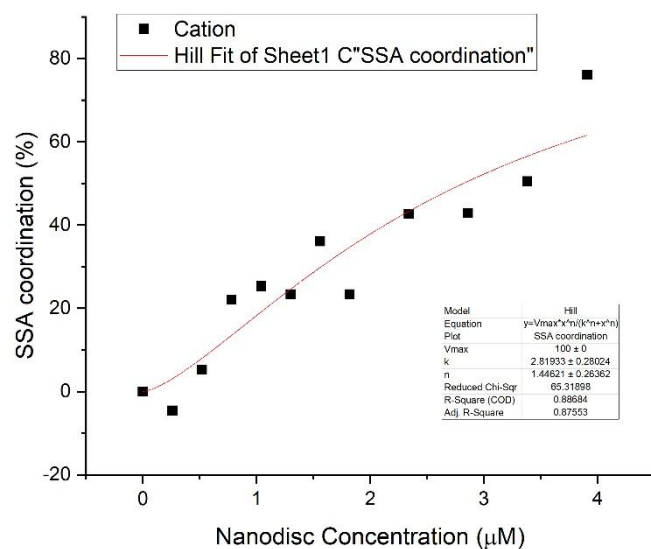

Figure S196 - Graph showing the percentage of SSA 11 cation coordinated to PG nanodiscs, with respect to increasing nanodisc concentration. Data was then fitted to the Hill model with  $V_{max}$  fixed at 100 %.

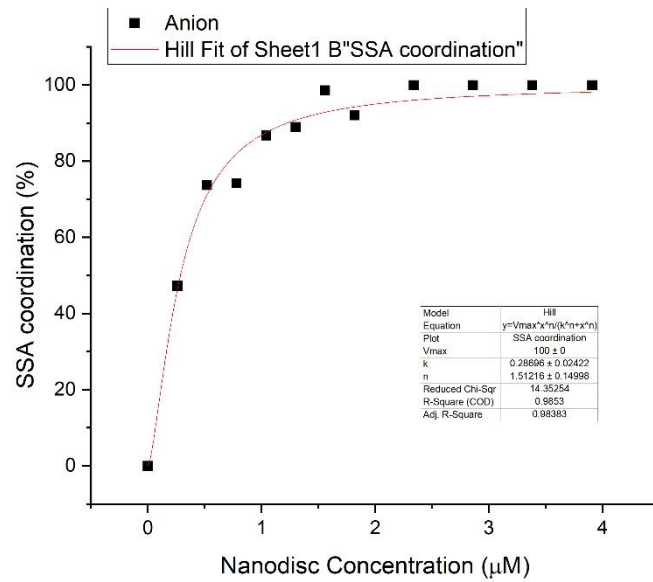

Figure S197 - Graph showing the percentage of SSA **12** anion coordinated to PG nanodiscs, with respect to increasing nanodisc concentration. Data was then fitted to the Hill model with  $V_{max}$  fixed at 100 %.

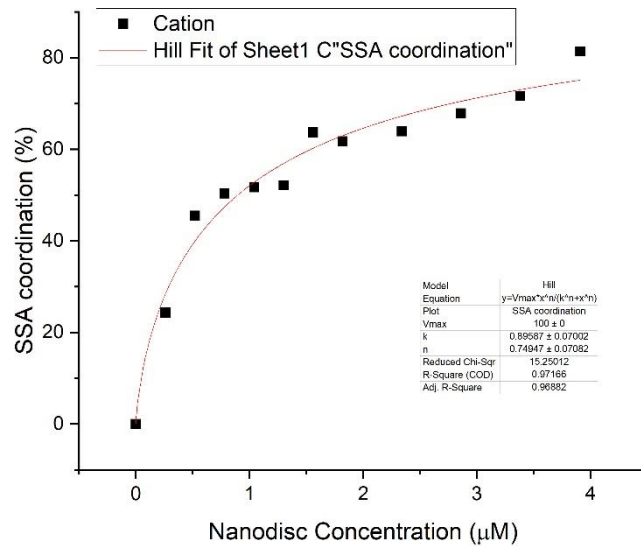

Figure S198 - Graph showing the percentage of SSA **12** cation coordinated to PG nanodiscs, with respect to increasing nanodisc concentration. Data was then fitted to the Hill model with  $V_{max}$  fixed at 100 %.

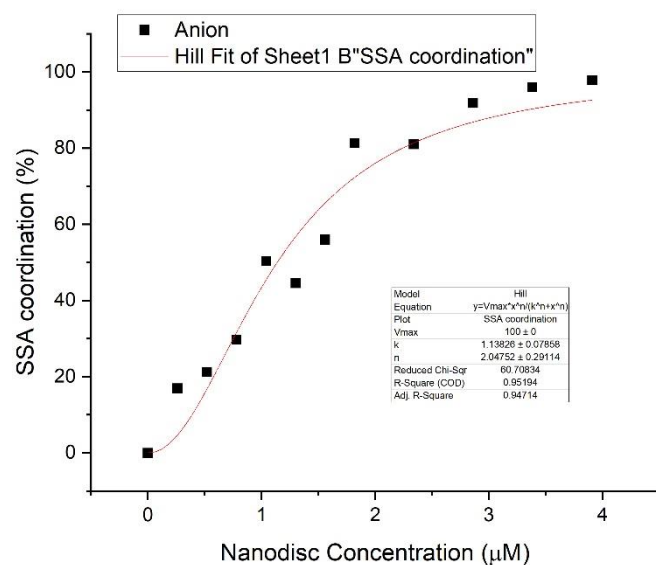

Figure S199 - Graph showing the percentage of SSA 5 anion coordinated to PE:PG 3:1 mix nanodiscs, with respect to increasing nanodisc concentration. Data was then fitted to the Hill model with  $V_{max}$  fixed at 100 %.

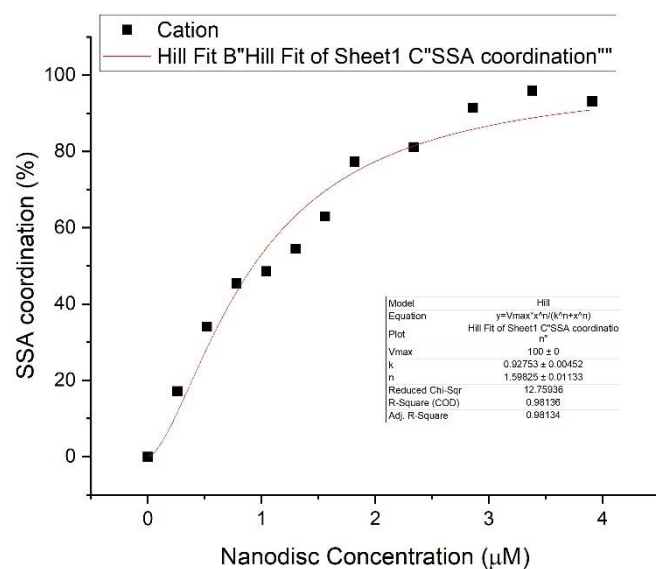

Figure S200 - Graph showing the percentage of SSA 5 cation coordinated to PE:PG 3:1 mix nanodiscs, with respect to increasing nanodisc concentration. Data was then fitted to the Hill model with  $V_{max}$  fixed at 100 %.



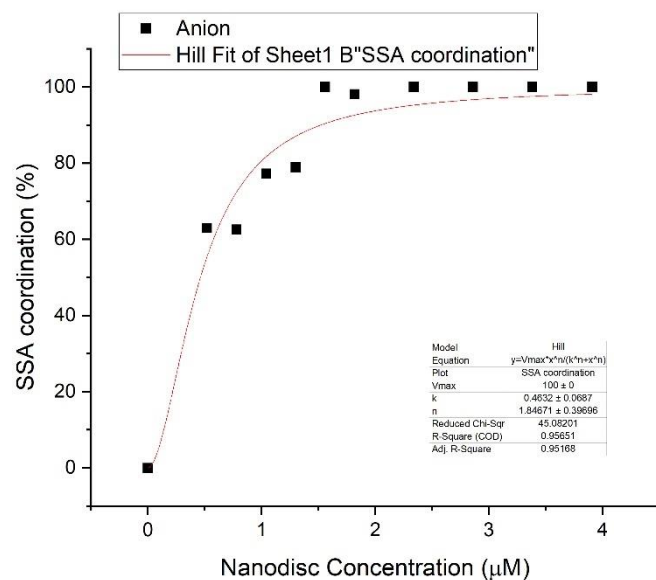

Figure S201 - Graph showing the percentage of SSA 6 anion coordinated to PE:PG 3:1 mix nanodiscs, with respect to increasing nanodisc concentration. Data was then fitted to the Hill model with  $V_{max}$  fixed at 100 %.

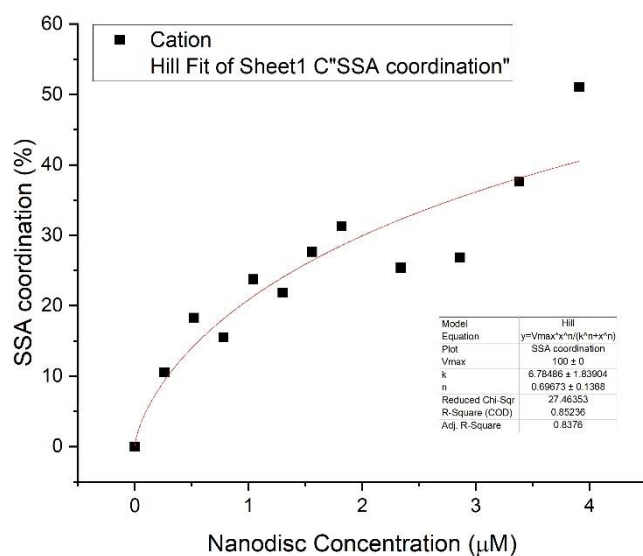

Figure S202 - Graph showing the percentage of SSA 6 cation coordinated to PE:PG 3:1 mix nanodiscs, with respect to increasing nanodisc concentration. Data was then fitted to the Hill model with  $V_{max}$  fixed at 100 %.

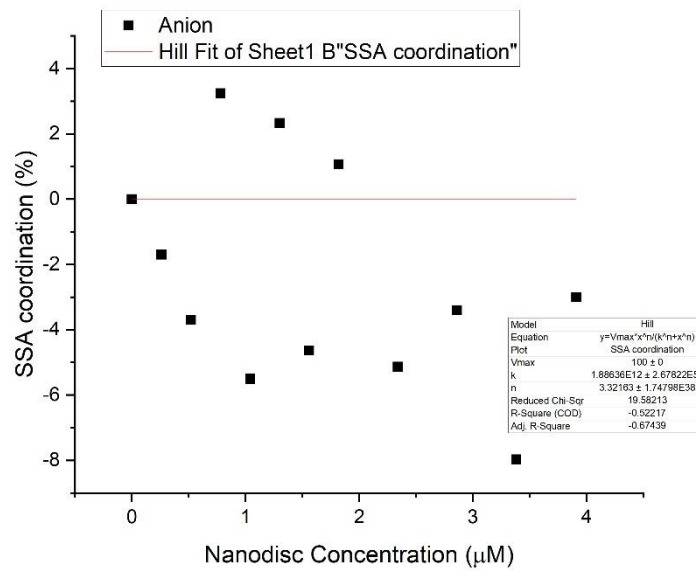

Figure S203 - Graph showing the percentage of SSA 7 anion coordinated to PE:PG 3:1 mix nanodiscs, with respect to increasing nanodisc concentration. Data was then fitted to the Hill model with  $V_{max}$  fixed at 100 %.

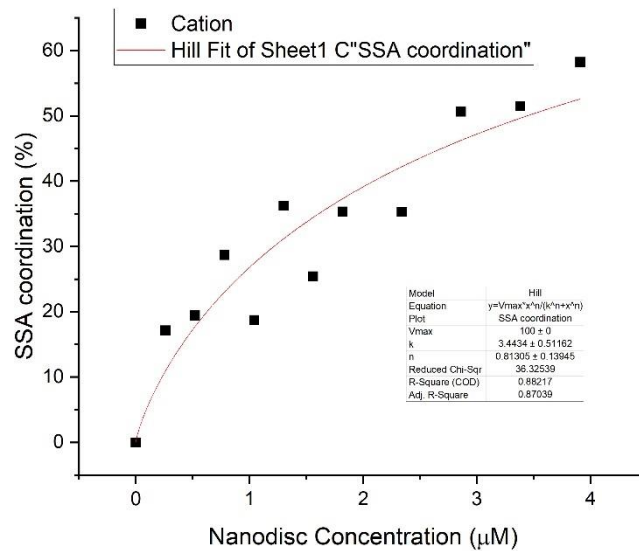

Figure S204 - Graph showing the percentage of SSA 7 cation coordinated to PE:PG 3:1 mix nanodiscs, with respect to increasing nanodisc concentration. Data was then fitted to the Hill model with  $V_{max}$  fixed at 100 %.

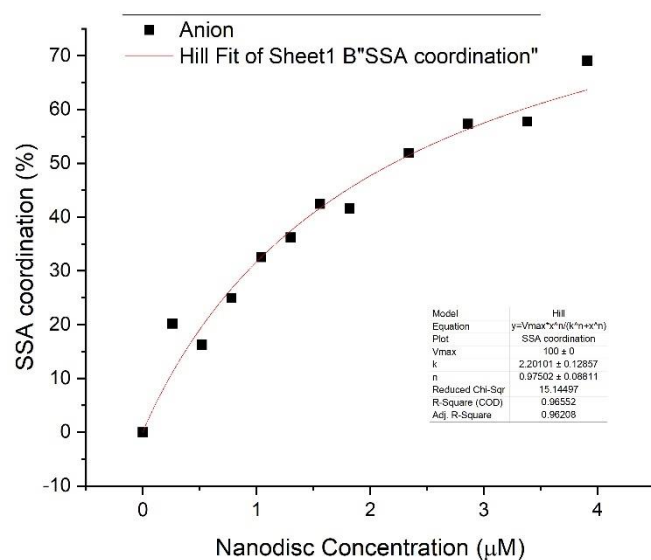

Figure S205 - Graph showing the percentage of SSA 8 anion coordinated to PE:PG 3:1 mix nanodiscs, with respect to increasing nanodisc concentration. Data was then fitted to the Hill model with  $V_{max}$  fixed at 100 %.

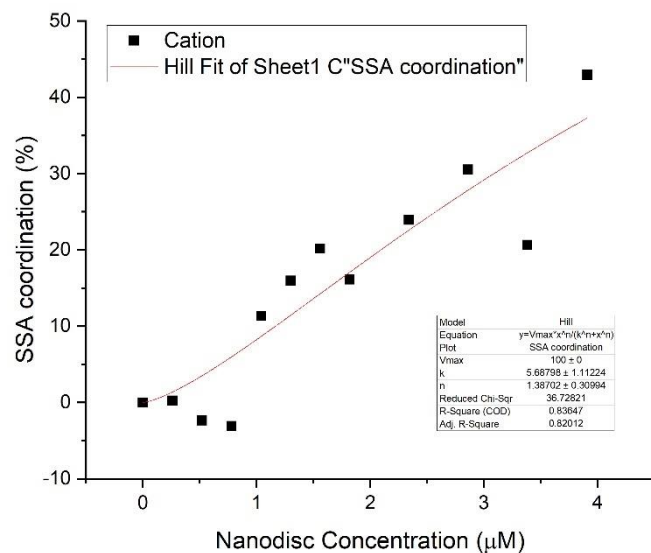

Figure S206 - Graph showing the percentage of SSA 8 cation coordinated to PE:PG 3:1 mix nanodiscs, with respect to increasing nanodisc concentration. Data was then fitted to the Hill model with  $V_{max}$  fixed at 100 %.

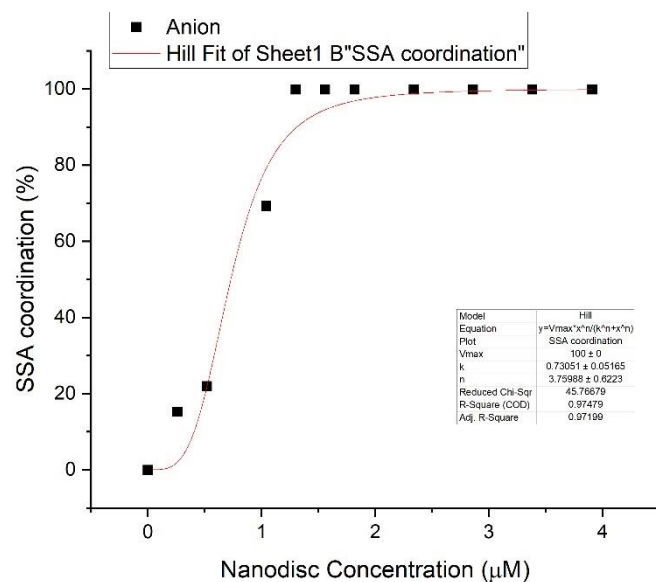

Figure S207 - Graph showing the percentage of SSA 9 anion coordinated to PE:PG 3:1 mix nanodiscs, with respect to increasing nanodisc concentration. Data was then fitted to the Hill model with  $V_{max}$  fixed at 100 %.

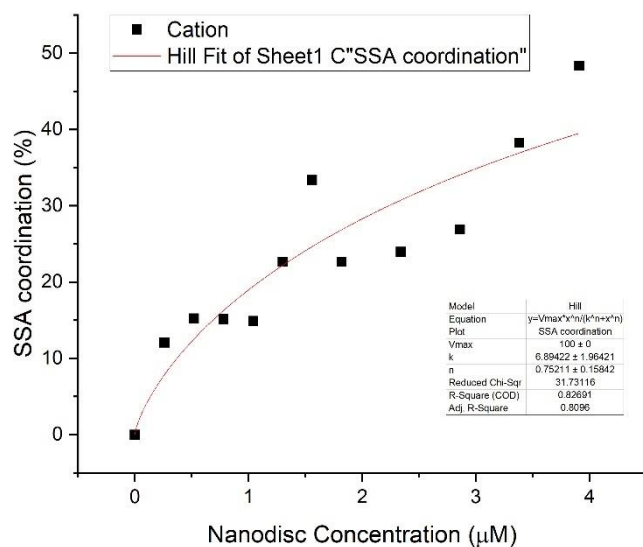

Figure S208 - Graph showing the percentage of SSA 9 cation coordinated to PE:PG 3:1 mix nanodiscs, with respect to increasing nanodisc concentration. Data was then fitted to the Hill model with  $V_{max}$  fixed at 100 %.

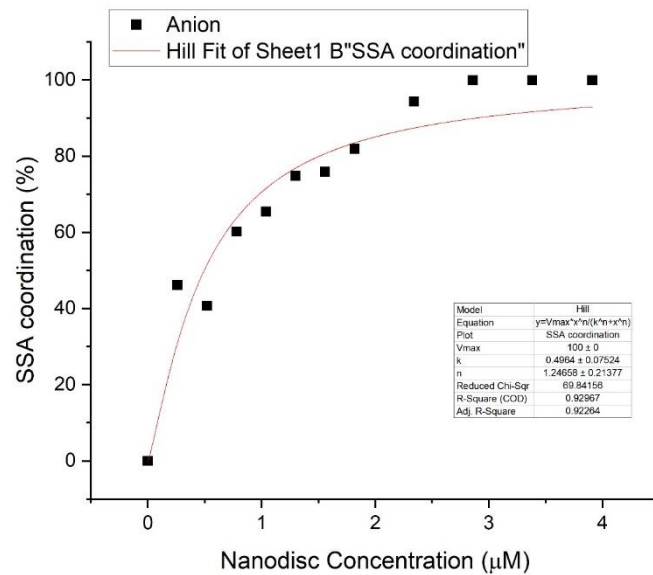

Figure S209 - Graph showing the percentage of SSA 10 anion coordinated to PE:PG 3:1 mix nanodiscs, with respect to increasing nanodisc concentration. Data was then fitted to the Hill model with  $V_{max}$  fixed at 100 %.

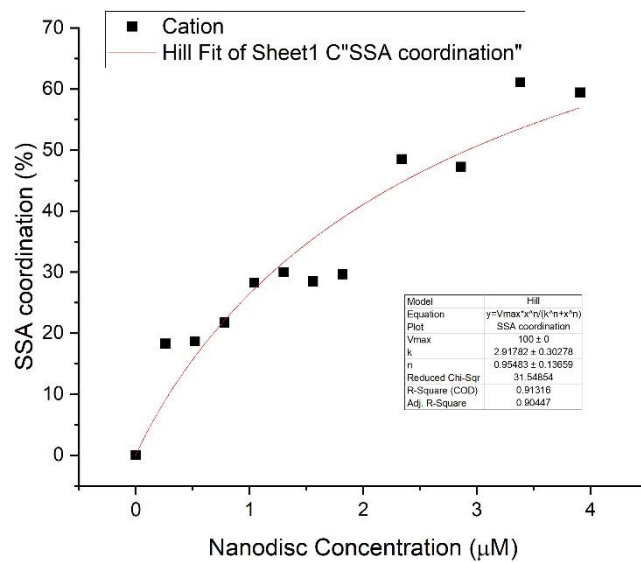

Figure S210 - Graph showing the percentage of SSA 10 cation coordinated to PE:PG 3:1 mix nanodiscs, with respect to increasing nanodisc concentration. Data was then fitted to the Hill model with  $V_{max}$  fixed at 100 %.

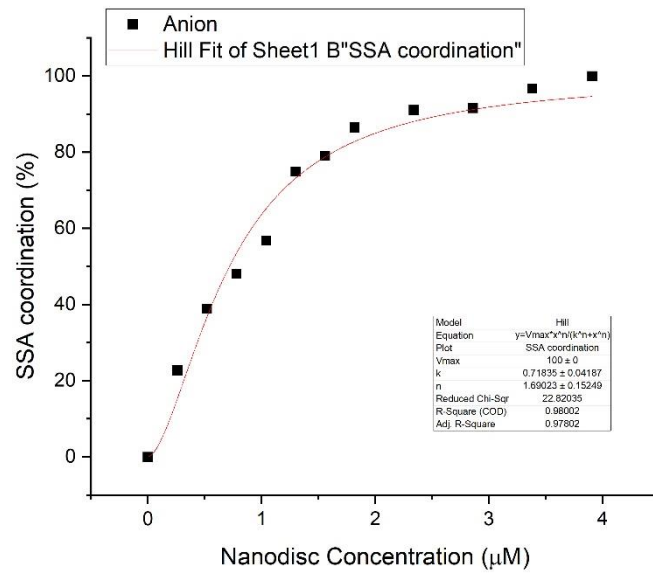

Figure S211 - Graph showing the percentage of SSA 11 anion coordinated to PE:PG 3:1 mix nanodiscs, with respect to increasing nanodisc concentration. Data was then fitted to the Hill model with  $V_{max}$  fixed at 100 %.

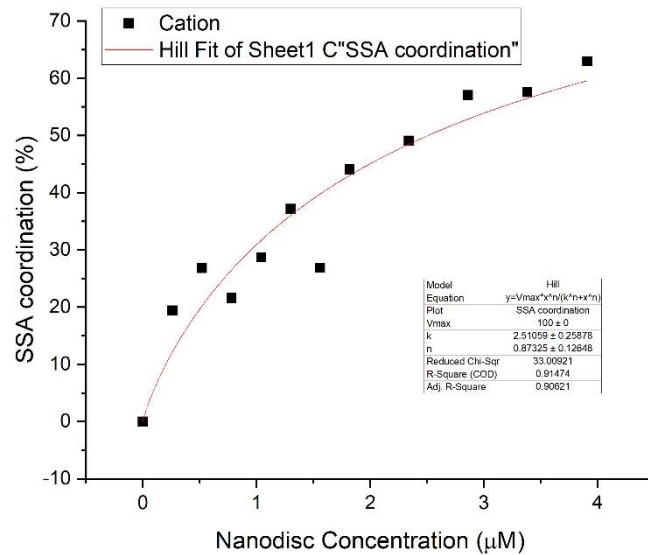

Figure S212 - Graph showing the percentage of SSA 11 cation coordinated to PE:PG 3:1 mix nanodiscs, with respect to increasing nanodisc concentration. Data was then fitted to the Hill model with  $V_{max}$  fixed at 100 %.

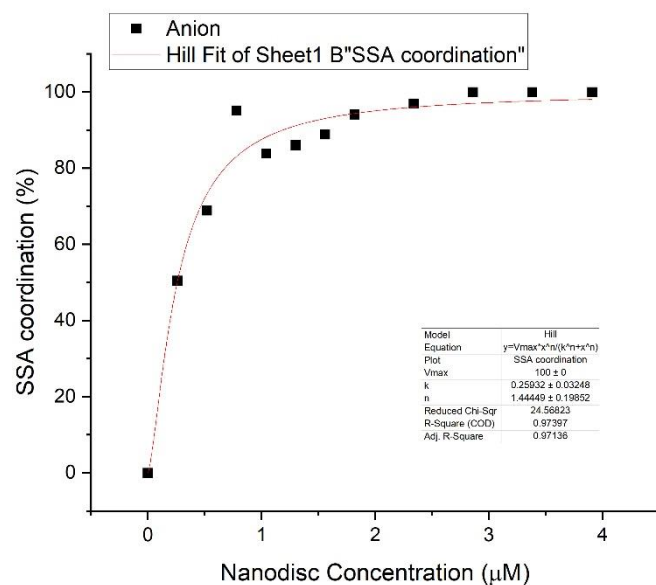

Figure S213 - Graph showing the percentage of SSA 12 anion coordinated to PE:PG 3:1 mix nanodiscs, with respect to increasing nanodisc concentration. Data was then fitted to the Hill model with  $V_{max}$  fixed at 100 %.

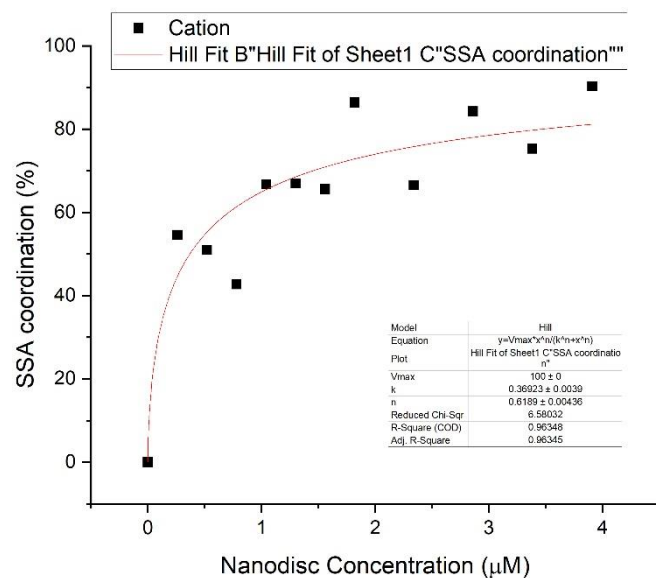

Figure S214 - Graph showing the percentage of SSA 11 cation coordinated to PE:PG 3:1 mix nanodiscs, with respect to increasing nanodisc concentration. Data was then fitted to the Hill model with  $V_{max}$  fixed at 100 %.

Table S5 - R<sup>2</sup> values obtained from the fitting of nanodisc titration data to either Michaelis-Menten (M. M.) or Hill Plot (H. P.) kinetics using Origin 2018 software, with V<sub>max</sub> fixed to 100 % of the SSA component bound to the nanodisc. Here A = represents the fit of the anionic component of the SSA to the relevant model and C = represents the fit of the cationic component of the SSA to the relevant model.

| SSA         | PC    |       | PG    |       | PE:PG mix |       |
|-------------|-------|-------|-------|-------|-----------|-------|
|             | M. M. | H. P. | M. M. | H. P. | M. M.     | H. P. |
| <b>5 A</b>  | 0.31  | 0.66  | 0.21  | 0.67  | 0.85      | 0.95  |
| <b>5 C</b>  | 0.45  | 0.45  | 0.97  | 0.97  | 0.92      | 0.98  |
| <b>6 A</b>  | 0.94  | 0.99  | 0.93  | 0.99  | 0.92      | 0.96  |
| <b>6 C</b>  | 0.73  | 0.81  | 0.97  | 0.97  | 0.80      | 0.85  |
| <b>7 A</b>  | 0.15  | 0.47  | a     | 0.00  | a         | a     |
| <b>7 C</b>  | 0.57  | 0.60  | 0.83  | 0.97  | 0.87      | 0.88  |
| <b>8 A</b>  | 0.88  | 0.88  | 0.56  | 0.75  | 0.97      | 0.97  |
| <b>8 C</b>  | 0.35  | 0.35  | 0.88  | 0.91  | 0.80      | 0.84  |
| <b>9 A</b>  | 0.97  | 0.99  | 0.74  | 0.97  | 0.79      | 0.97  |
| <b>9 C</b>  | 0.53  | 0.99  | 0.91  | 0.94  | 0.79      | 0.83  |
| <b>10 A</b> | 0.92  | 0.97  | 0.94  | 0.97  | 0.92      | 0.93  |
| <b>10 C</b> | 0.77  | 1.00  | 0.91  | 0.98  | 0.91      | 0.91  |
| <b>11 A</b> | 0.98  | 0.98  | 0.78  | 0.94  | 0.92      | 0.98  |
| <b>11 C</b> | 0.35  | 0.66  | 0.84  | 0.87  | 0.91      | 0.91  |
| <b>12 A</b> | 0.99  | 1.00  | 0.96  | 0.99  | 0.96      | 0.97  |
| <b>12 C</b> | 0.61  | 0.94  | 0.94  | 0.97  | 0.81      | 0.96  |

a - No fit could be obtained for this data set.



## Section 15: Computational data

### Binding energy calculations using ab initio and DFT modelling

As the headgroup of a phospholipid is expected to be the main portion interacting with the SSAs, modelling of phospholipids was performed on simplified structures truncated to only include the headgroup of the phospholipid to minimise computational resource demand. The structures of the simplified model lipid headgroups is shown in Figure S216.

The lowest energy conformations of the SSAs and phospholipid headgroups were first optimised individually at the HF/3-21G level using Gaussian09 with a polarisable continuum model (PCM) solvent model for water. A range of SSA-headgroup interaction conformations were then optimised using the same computational parameters. The binding energy for each SSA-headgroup conformation was then calculated using Equation S2 – the energies were obtained from the output file and converted from Hartree to kJ/mol. The data shown in the main paper (Figure 3) represents the lowest energy binding conformations identified using these means. All calculated binding energies are shown in Figures S217–222. Cartesian coordinates for the minimised binding conformations are given in Tables S7–50 and 3D visualisations of the structures are shown in Figures S224–267.

### Discussion relating to the choice of supporting molecular modelling studies

The results of our experimental nanodisc binding assay imply that the binding of the anionic and cationic components of the SSAs are not necessarily intrinsically linked. While both SSA components do bind to the nanodiscs, we often observed much higher  $EC_{50}$  values for the binding of the cationic component compared to the anionic component (see the data in Section 13, Table S5). This tells us that for a particular concentration of SSA, we would not necessarily expect the same proportion of the anionic and cationic components to be bound to a lipid bilayer, so estimating the stoichiometry that should ideally be studied is not straightforward.

The overall model we have selected simplifies the problem of SSA-bilayer interactions to the interactions between a single SSA and a single lipid headgroup. The simplified model already abstracts the whole of the membrane to a continuum solvent model in order to reduce the conformational space to one which can be reasonably explored by hand. Adding in a membrane (which would be necessary to limit the potential anion location relative to the SSA) would be prohibitively computationally expensive even at this low level. Likewise, the range of potential cation/anion/ lipid headgroup orientations is prohibitively large to sample manually.

$$\text{SSA-headgroup binding energy} = \text{SSA-headgroup energy} - (\text{SSA energy} + \text{headgroup energy})$$

Equation S2 - Calculation of SSA-headgroup binding energy.

We considered more accurate, computationally demanding approaches, like density functional theory (DFT) and increased basis set size, for calculating binding energies but when using both ab initio (HF/3-21G) and DFT (M06-2X/6-31G) methods for the same conformations, we found that the correlation between these two methods is high (Figure S215). The M06-2X functional was chosen it includes a dispersion consideration and has been shown to be effective at modelling hydrogen bonding to anions.<sup>12</sup> As these are indicative calculations, neglecting both anion-cation interactions of the SSA and explicit solvation and the rest of the bilayer, only trends and differences rather than absolute energies are of interest. Given the strong correlation seen, we have opted to use the

results from the simplest, lowest cost calculations to facilitate rapid screening of the possible interaction geometries.

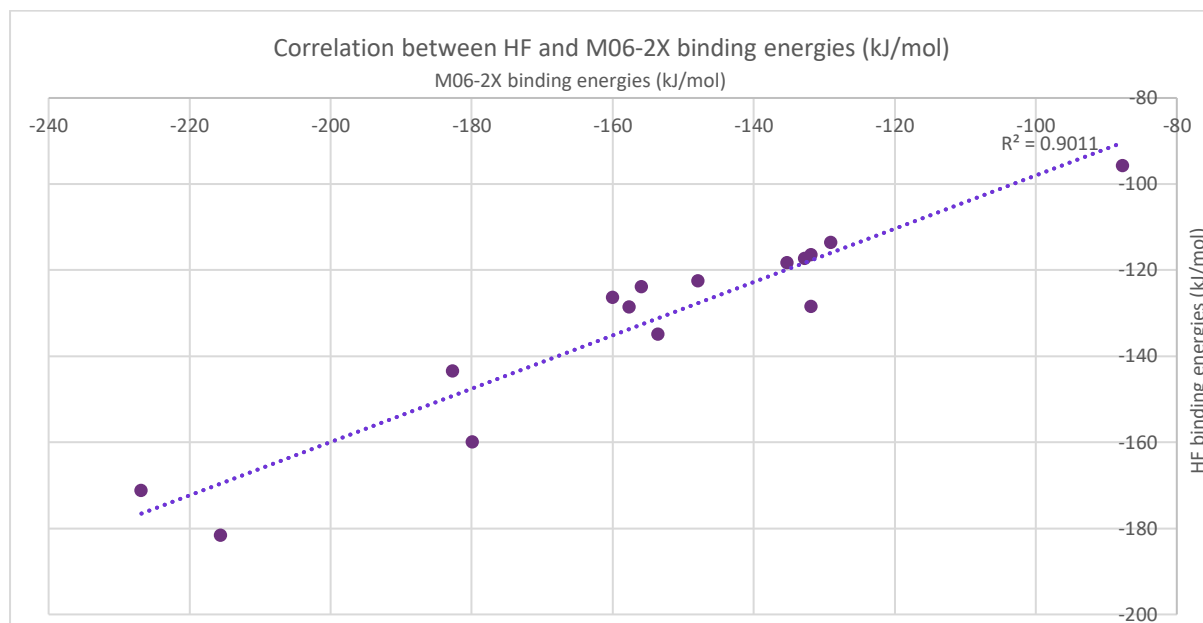

Figure S215 - Correlation data between ab initio and DFT binding energies (kJ/mol).

For SSA 4-headgroup conformations, binding energies were also calculated at the M06-2X/6-31G level by determining the individual SSA, headgroup and SSA-headgroup energies and using equation S1 again.

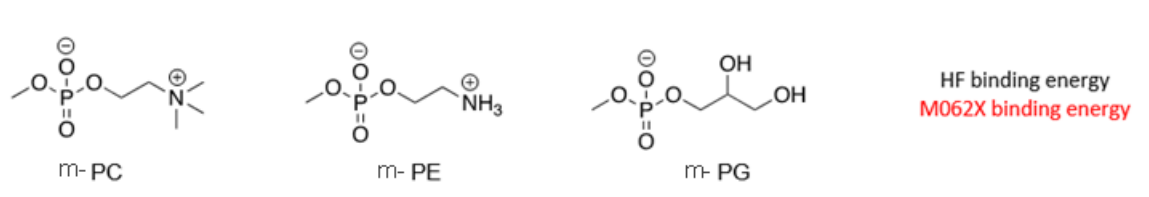

Figure S216 - The structure of the simplified model lipid headgroups (m-lipid) studied, and a key to the binding energies shown in Figures S217-222.

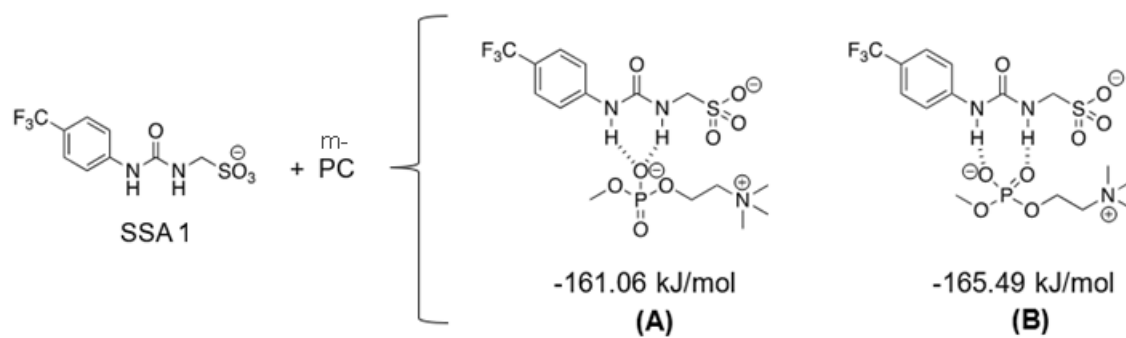

Figure S217 - Calculated binding energies for SSA 1-PC conformations.

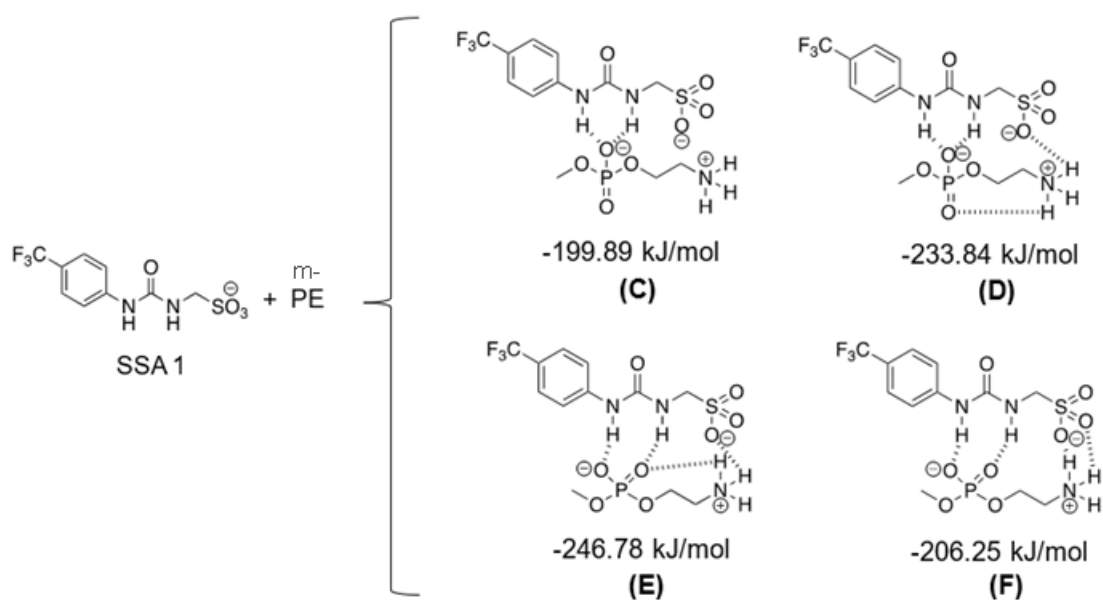

Figure S218 - Calculated binding energies for SSA 1-PE conformations.

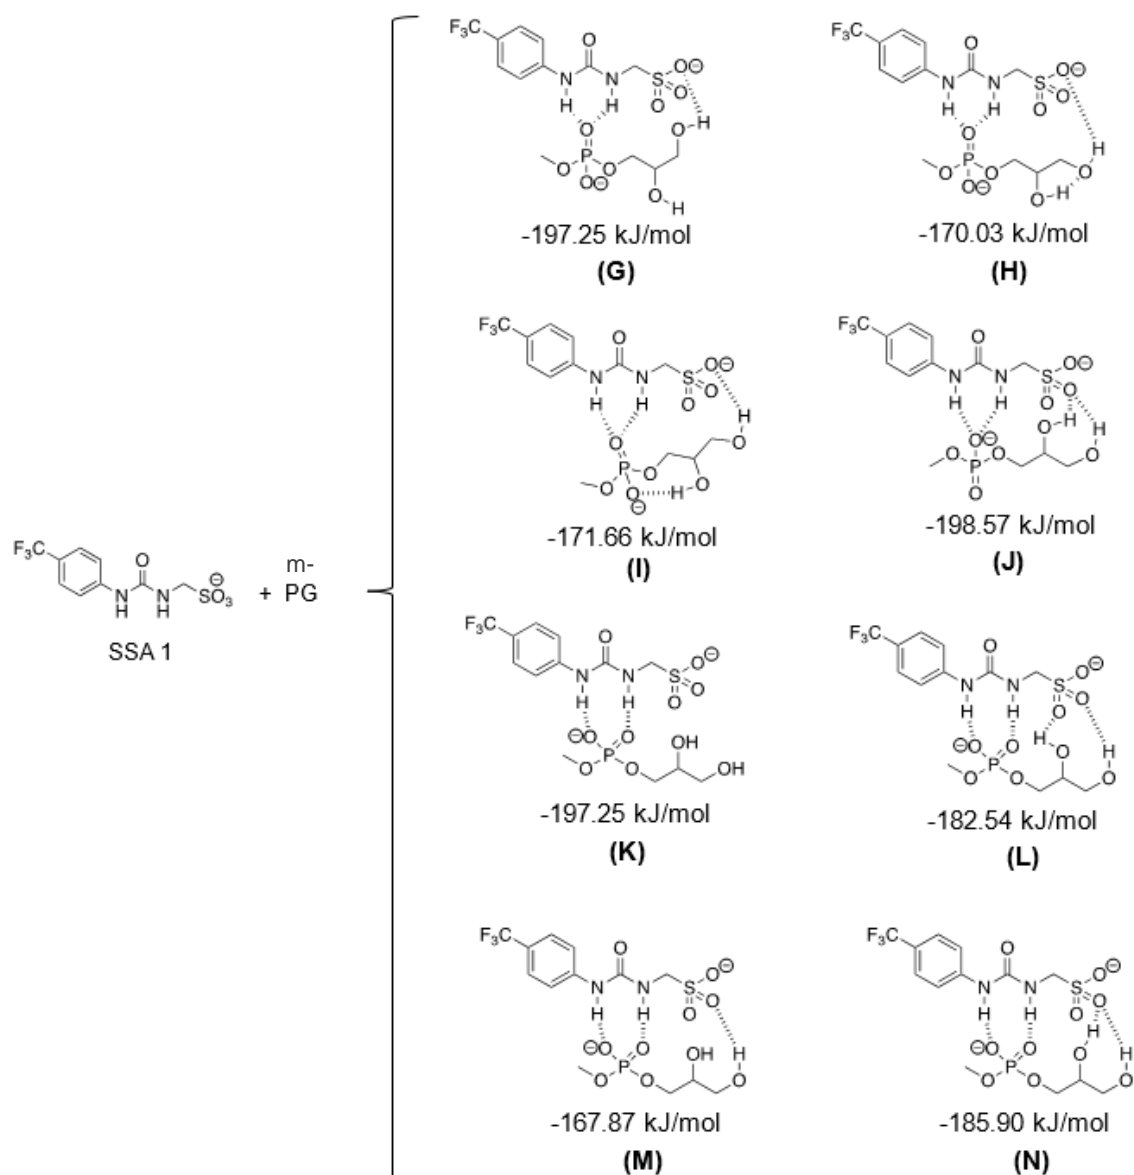

Figure S219 - Calculated binding energies for SSA 1-PG conformations.

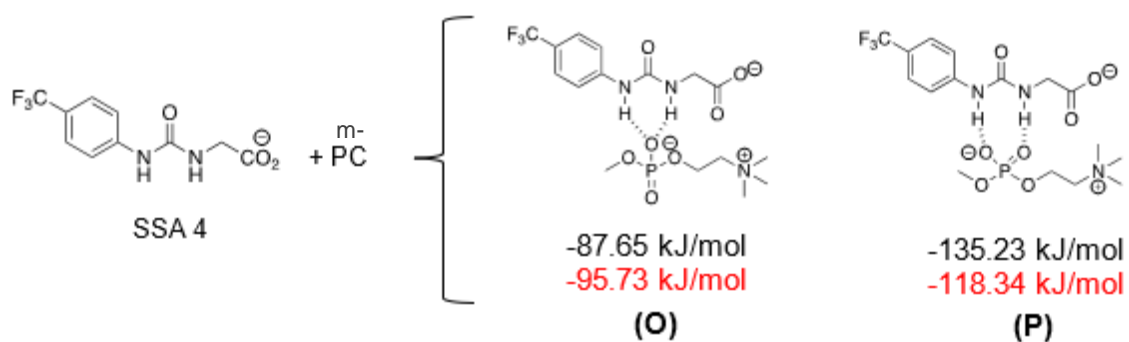

Figure S220 - Calculated binding energies for SSA 4-PC conformations.

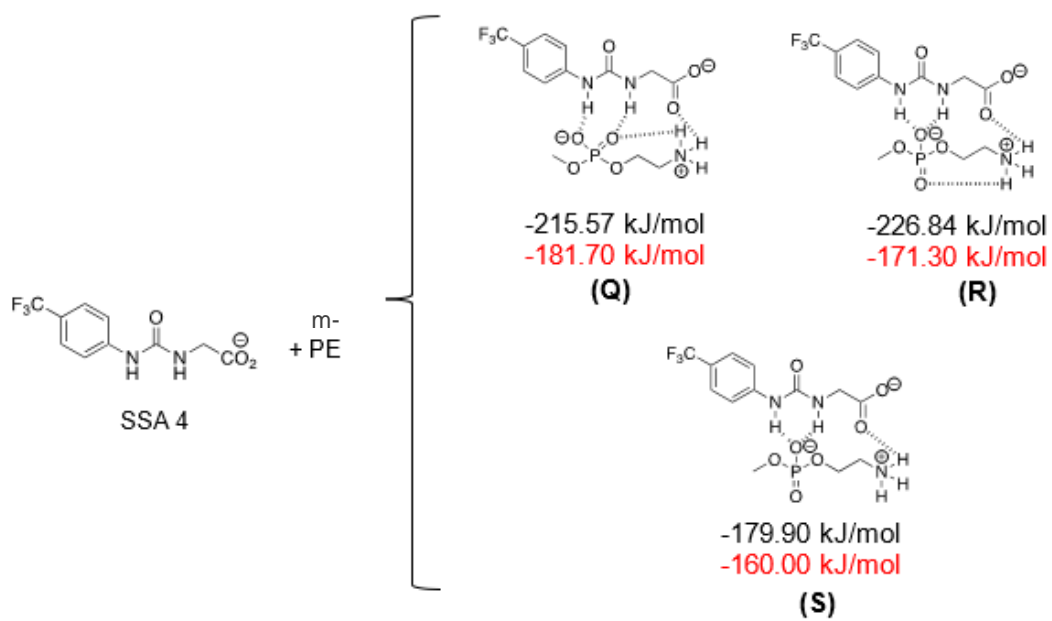

Figure S221 - Calculated binding energies for SSA 4-PE conformations.

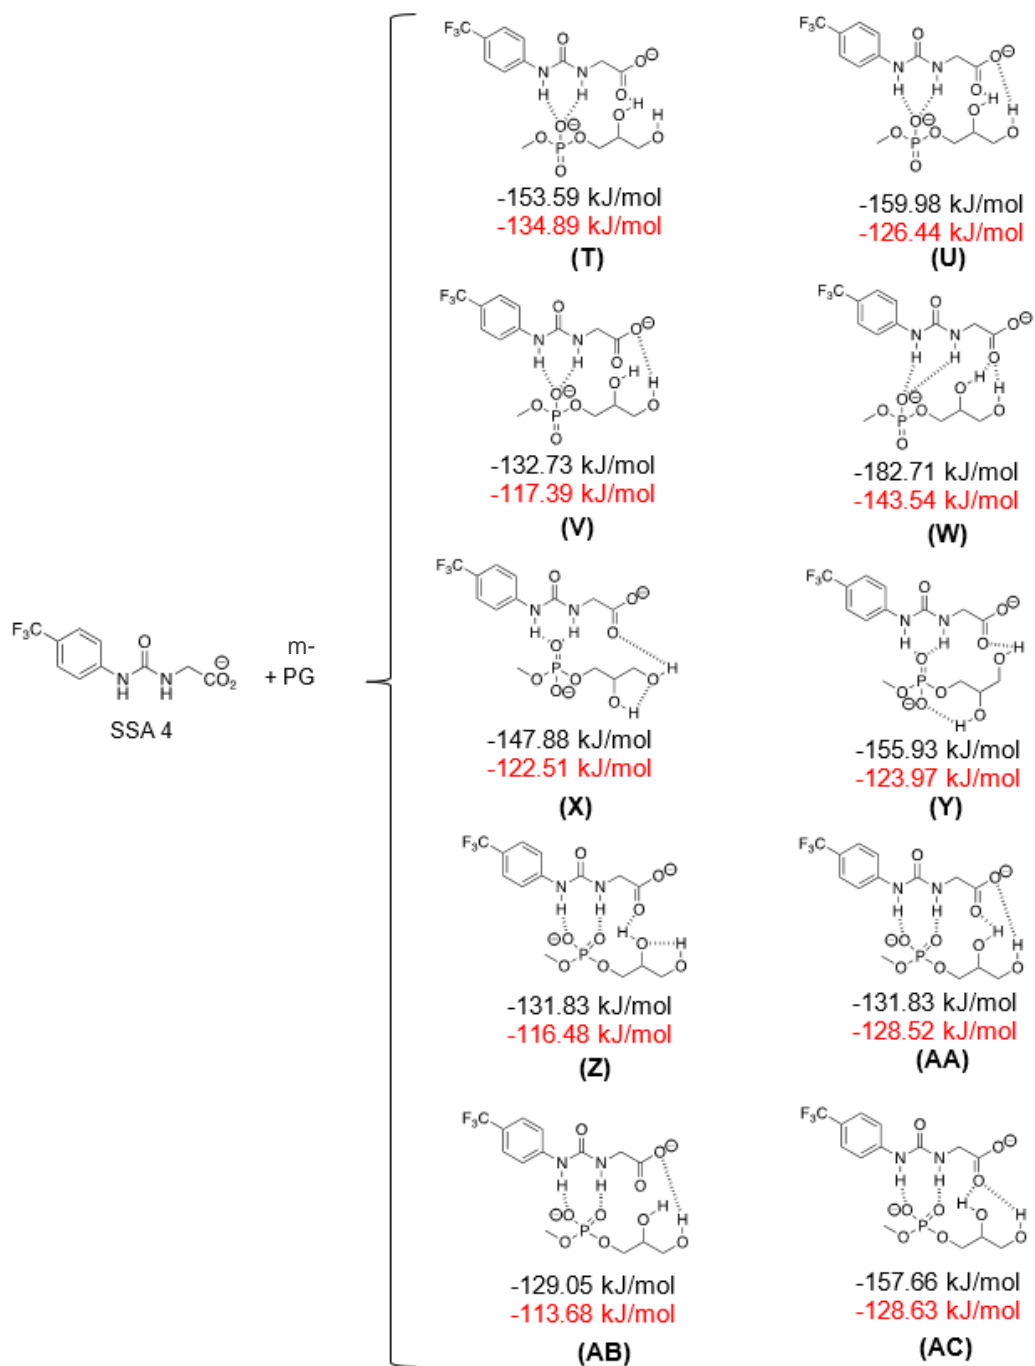

Figure S222 - Calculated binding energies for SSA 4-PG conformations.

## Solvent model comparison

Another two sets of calculations were run on conformation **T** (Figure S222) to compare the effect of using different PCM solvent models. SSA **1**, the model PG lipid headgroup and structure **T** were optimised in the gas phase at the HF/3-21G level using Gaussian09, as well as with a PCM solvent model for *n*-hexane. Binding energies (kJ/mol) were subsequently calculated using equation 1 and are shown in Table S6. As expected, calculated binding energies were significantly larger in magnitude in hexane and the gas phase by comparison to water. This is typical of hydrogen bonded complex formation and supports the choice of computational method.

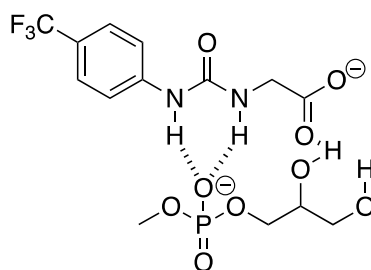

Figure S223 - Conformation **T**.

Table S6 - Conformation **T** binding energy in gas phase, PCM model for water and PCM model for *n*-hexane.

|                  | Structure <b>T</b> binding energy (kJ/mol) |
|------------------|--------------------------------------------|
| Water            | -161                                       |
| <i>n</i> -Hexane | -305819                                    |
| Gas phase        | -305761                                    |

Cartesian coordinates calculated at HF/3-21G level.

Table S7 - Cartesian coordinates (given in Angstroms) generated for structure **A** (Figure S217), calculated at HF/3-21G level, after energy minimisation calculations.

| Atom | X          | Y          | Z          |
|------|------------|------------|------------|
| 1 O  | -3.3602690 | 1.7078880  | 0.1401930  |
| 2 S  | -2.6684830 | 3.1330930  | 0.0515130  |
| 3 C  | -1.5639000 | 2.9919140  | -1.4006180 |
| 4 N  | -0.6789990 | 1.9008690  | -1.2147100 |
| 5 C  | 0.6257400  | 2.0926540  | -0.8802630 |
| 6 N  | 1.2537320  | 0.9061900  | -0.6274680 |
| 7 C  | 2.5828170  | 0.6958480  | -0.3055050 |
| 8 C  | 3.5276190  | 1.7120310  | -0.1589370 |
| 9 C  | 4.8312040  | 1.3996750  | 0.1651800  |
| 10 C | 5.2173380  | 0.0871450  | 0.3478650  |
| 11 C | 6.6016120  | -0.2315860 | 0.7470240  |
| 12 F | 7.4876160  | 0.6897310  | 0.2977730  |
| 13 F | 6.7807620  | -0.2834540 | 2.0945650  |
| 14 F | 7.0003540  | -1.4408310 | 0.2825830  |
| 15 C | 4.2881550  | -0.9284590 | 0.1986540  |
| 16 C | 2.9860080  | -0.6333860 | -0.1247510 |
| 17 O | 1.1549870  | 3.2044230  | -0.8345150 |
| 18 O | -3.6801820 | 4.2836740  | -0.3084310 |
| 19 O | -1.7728990 | 3.4406970  | 1.3096830  |
| 20 H | -1.0218290 | 3.9160410  | -1.4854660 |
| 21 H | -2.2222540 | 2.8504110  | -2.2412300 |
| 22 H | -1.0351490 | 0.9518140  | -1.2090240 |
| 23 H | 0.6415440  | 0.0878650  | -0.6821810 |
| 24 H | 3.2256590  | 2.7221630  | -0.3035800 |
| 25 H | 5.5511760  | 2.1861880  | 0.2673520  |
| 26 H | 4.5870370  | -1.9492450 | 0.3251600  |
| 27 H | 2.2677360  | -1.4199010 | -0.2498290 |
| 28 C | -5.0251540 | 0.1085820  | 2.1663120  |
| 29 N | -5.0014030 | -1.0173940 | 1.1427700  |
| 30 C | -5.8585450 | -2.1542050 | 1.6423660  |
| 31 C | -5.5570650 | -0.4708390 | -0.1596810 |
| 32 C | -3.5505550 | -1.4383530 | 0.9621750  |
| 33 C | -3.3502510 | -2.6948120 | 0.1063540  |
| 34 O | -1.9221230 | -2.9152720 | 0.0849990  |
| 35 P | -0.9581040 | -2.3148610 | -1.1131910 |
| 36 O | -0.7960840 | -0.7836530 | -0.8864180 |
| 37 O | 0.4503390  | -3.0039600 | -0.6459410 |
| 38 C | 0.5632380  | -4.3935440 | -0.2335380 |
| 39 O | -1.4535180 | -2.8139870 | -2.4834070 |
| 40 H | -3.1557930 | -1.6354640 | 1.9466440  |
| 41 H | -3.0340480 | -0.5982750 | 0.5257700  |
| 42 H | -3.7217880 | -2.5800210 | -0.9010200 |
| 43 H | -3.7873260 | -3.5688410 | 0.5551480  |
| 44 H | 0.2417620  | -5.0495960 | -1.0304430 |
| 45 H | -0.0368610 | -4.5672890 | 0.6446140  |
| 46 H | 1.6043200  | -4.5638090 | -0.0196780 |
| 47 H | -5.4090810 | -2.5612720 | 2.5345800  |
| 48 H | -5.9364310 | -2.9099960 | 0.8787900  |
| 49 H | -6.8388830 | -1.7650610 | 1.8661530  |
| 50 H | -4.4193440 | 0.9059140  | 1.7681870  |
| 51 H | -4.6325730 | -0.2711340 | 3.0966400  |
| 52 H | -6.0497450 | 0.4220610  | 2.2936230  |
| 53 H | -4.9434450 | 0.3703310  | -0.4386710 |
| 54 H | -6.5764990 | -0.1633310 | 0.0150320  |
| 55 H | -5.5343710 | -1.2472760 | -0.9064710 |



Table S8 - Cartesian coordinates (given in Angstroms) generated for structure **B** (Figure S217), calculated at HF/3-21G level, after energy minimisation calculations.

| Atom |   | X          | Y          | Z          |
|------|---|------------|------------|------------|
| 1    | O | -3.7595850 | -1.5487370 | 0.2603580  |
| 2    | S | -2.7926390 | -2.7834510 | 0.5068000  |
| 3    | C | -1.8530430 | -2.4171690 | 2.0461490  |
| 4    | N | -0.9610130 | -1.3430340 | 1.8029950  |
| 5    | C | 0.3062380  | -1.6056560 | 1.3801220  |
| 6    | N | 0.9561500  | -0.5017620 | 0.9037540  |
| 7    | C | 2.2956140  | -0.4112780 | 0.5435700  |
| 8    | C | 3.2146220  | -1.4575500 | 0.6253290  |
| 9    | C | 4.5273580  | -1.2525220 | 0.2528810  |
| 10   | C | 4.9473810  | -0.0208750 | -0.2058470 |
| 11   | C | 6.3406540  | 0.1695720  | -0.6526070 |
| 12   | F | 7.2031700  | -0.6446320 | 0.0023700  |
| 13   | F | 6.5275840  | -0.0895730 | -1.9749910 |
| 14   | F | 6.7649870  | 1.4436810  | -0.4700100 |
| 15   | C | 4.0427340  | 1.0241070  | -0.2904170 |
| 16   | C | 2.7338030  | 0.8359430  | 0.0794660  |
| 17   | O | 0.8074150  | -2.7294560 | 1.4481760  |
| 18   | O | -3.5756980 | -4.1211960 | 0.7894930  |
| 19   | O | -1.7113810 | -2.9060670 | -0.6405470 |
| 20   | H | -1.3297730 | -3.3238280 | 2.2899760  |
| 21   | H | -2.5862320 | -2.1724850 | 2.7947650  |
| 22   | H | -1.2904500 | -0.3893170 | 1.9783830  |
| 23   | H | 0.4217620  | 0.3525830  | 0.7337410  |
| 24   | H | 2.8872800  | -2.4080890 | 0.9722610  |
| 25   | H | 5.2271580  | -2.0600600 | 0.3287360  |
| 26   | H | 4.3661530  | 1.9853860  | -0.6349060 |
| 27   | H | 2.0224700  | 1.6337870  | 0.0245060  |
| 28   | C | -2.7581130 | 1.0747060  | -4.3112910 |
| 29   | N | -2.8551440 | 0.4762570  | -2.9236310 |
| 30   | C | -4.2121060 | -0.1827160 | -2.7593450 |
| 31   | C | -1.7848300 | -0.5920410 | -2.7897600 |
| 32   | C | -2.6295520 | 1.5943030  | -1.9061940 |
| 33   | C | -3.3421820 | 1.4095030  | -0.5609580 |
| 34   | O | -2.8198870 | 2.4846150  | 0.2678870  |
| 35   | P | -1.5067510 | 2.2406200  | 1.2283120  |
| 36   | O | -0.2692300 | 1.9233630  | 0.3353700  |
| 37   | O | -1.3581560 | 3.7335280  | 1.8585020  |
| 38   | C | -2.4708120 | 4.4993460  | 2.3984130  |
| 39   | O | -1.8569590 | 1.1800130  | 2.3074540  |
| 40   | H | -2.9729780 | 2.5122240  | -2.3542130 |
| 41   | H | -1.5710450 | 1.6556860  | -1.7181900 |
| 42   | H | -3.1713970 | 0.4459500  | -0.1089340 |
| 43   | H | -4.4012760 | 1.5810190  | -0.6417560 |
| 44   | H | -2.9157230 | 3.9764550  | 3.2332240  |
| 45   | H | -3.2127350 | 4.6625320  | 1.6333550  |
| 46   | H | -2.0591520 | 5.4368460  | 2.7311060  |
| 47   | H | -4.9758740 | 0.5769880  | -2.8121340 |
| 48   | H | -4.2291580 | -0.7026690 | -1.8137660 |
| 49   | H | -4.3373260 | -0.8836070 | -3.5700580 |
| 50   | H | -1.7974010 | 1.5548270  | -4.4117110 |
| 51   | H | -3.5526520 | 1.7930780  | -4.4341480 |
| 52   | H | -2.8561970 | 0.2809600  | -5.0339970 |
| 53   | H | -0.8212650 | -0.1133020 | -2.8664960 |
| 54   | H | -1.9140450 | -1.2880350 | -3.6049940 |
| 55   | H | -1.8870340 | -1.1210370 | -1.8569730 |

Table S9 - Cartesian coordinates (given in Angstroms) generated for structure **C** (Figure S218), calculated at HF/3-21G level, after energy minimisation calculations.

| Atom | X          | Y          | Z          |
|------|------------|------------|------------|
| 1 O  | 2.0500320  | -3.5509280 | 1.1871810  |
| 2 S  | 3.0075620  | -2.8846540 | 0.1311920  |
| 3 C  | 2.0287270  | -2.4682110 | -1.3617700 |
| 4 N  | 1.1043410  | -1.4375750 | -1.0676140 |
| 5 C  | -0.2174200 | -1.6907020 | -0.8783140 |
| 6 N  | -0.9040980 | -0.5509290 | -0.5589110 |
| 7 C  | -2.2649740 | -0.4194240 | -0.3355440 |
| 8 C  | -3.1787990 | -1.4723360 | -0.3995110 |
| 9 C  | -4.5174150 | -1.2383430 | -0.1661320 |
| 10 C | -4.9714970 | 0.0308110  | 0.1321140  |
| 11 C | -6.3991650 | 0.2579980  | 0.4292610  |
| 12 F | -7.2015770 | -0.6126780 | -0.2290210 |
| 13 F | -6.7088940 | 0.1163060  | 1.7458540  |
| 14 F | -6.7949620 | 1.5101980  | 0.0956430  |
| 15 C | -4.0747750 | 1.0824910  | 0.1947350  |
| 16 C | -2.7383200 | 0.8621770  | -0.0357720 |
| 17 O | -0.7150470 | -2.8096880 | -1.0007420 |
| 18 O | 3.5423870  | -1.4860190 | 0.6432960  |
| 19 O | 4.1572750  | -3.8272490 | -0.3806910 |
| 20 H | 1.5253500  | -3.3669170 | -1.6694750 |
| 21 H | 2.7592970  | -2.1638050 | -2.0921450 |
| 22 H | 1.4191110  | -0.4833970 | -0.9490600 |
| 23 H | -0.3345390 | 0.2904570  | -0.4932810 |
| 24 H | -2.8266130 | -2.4485710 | -0.6333910 |
| 25 H | -5.2115260 | -2.0518410 | -0.2274760 |
| 26 H | -4.4224230 | 2.0715710  | 0.4127460  |
| 27 H | -2.0455220 | 1.6780520  | 0.0080050  |
| 28 H | 5.0290430  | 0.5509450  | 2.6292560  |
| 29 H | 5.9897650  | 0.6526220  | 0.4107830  |
| 30 C | 4.6094050  | 1.2185030  | 1.8938940  |
| 31 H | 5.0303070  | 2.2042350  | 2.0040660  |
| 32 N | 4.9853400  | 0.6864180  | 0.5249770  |
| 33 H | 4.5765640  | -0.2716150 | 0.4296910  |
| 34 C | 3.0906700  | 1.2629550  | 2.0533040  |
| 35 H | 4.5511600  | 1.3050140  | -0.2183960 |
| 36 H | 2.8489450  | 1.4423740  | 3.0870050  |
| 37 H | 2.6660380  | 0.3262750  | 1.7289370  |
| 38 O | 2.5139770  | 2.3763000  | 1.3147500  |
| 39 O | 3.5376320  | 2.2007920  | -1.0552640 |
| 40 P | 2.1863560  | 2.3383260  | -0.2898770 |
| 41 O | 1.1017950  | 1.2658010  | -0.5828980 |
| 42 O | 1.5951260  | 3.8436270  | -0.4616830 |
| 43 H | 2.8927760  | 4.5055620  | -1.9584040 |
| 44 C | 1.8807030  | 4.6732340  | -1.6259070 |
| 45 H | 1.7487800  | 5.6950420  | -1.3141700 |
| 46 H | 1.1887010  | 4.4377300  | -2.4207970 |

Table S10 - Cartesian coordinates (given in Angstroms) generated for structure **D** (Figure S218), calculated at HF/3-21G level, after energy minimisation calculations.

| Atom | X          | Y          | Z          |
|------|------------|------------|------------|
| 1 O  | 2.5760190  | -2.2585860 | 1.3095420  |
| 2 S  | 3.6775460  | -2.2505030 | 0.1665310  |
| 3 C  | 2.7822360  | -2.2724660 | -1.4484460 |
| 4 N  | 1.7222230  | -1.3429300 | -1.3933680 |
| 5 C  | 0.4732100  | -1.7444660 | -1.0257610 |
| 6 N  | -0.3505520 | -0.6772100 | -0.8017100 |
| 7 C  | -1.7060410 | -0.7005810 | -0.5047280 |
| 8 C  | -2.4643570 | -1.8670240 | -0.4019780 |
| 9 C  | -3.8109400 | -1.7899300 | -0.1136920 |
| 10 C | -4.4221530 | -0.5674030 | 0.0772840  |
| 11 C | -5.8517540 | -0.5007050 | 0.4375700  |
| 12 F | -6.5555240 | -1.5404350 | -0.0715730 |
| 13 F | -6.0752180 | -0.5308310 | 1.7789190  |
| 14 F | -6.4351480 | 0.6406120  | -0.0019280 |
| 15 C | -3.6775390 | 0.5947530  | -0.0238110 |
| 16 C | -2.3350390 | 0.5338560  | -0.3111070 |
| 17 O | 0.1466740  | -2.9270570 | -0.9371510 |
| 18 O | 4.4618060  | -0.8592770 | 0.1904960  |
| 19 O | 4.6401420  | -3.4950890 | 0.1891930  |
| 20 H | 2.4190940  | -3.2753800 | -1.5786980 |
| 21 H | 3.5218910  | -2.0186490 | -2.1875290 |
| 22 H | 1.8975220  | -0.3437360 | -1.4432570 |
| 23 H | 0.1106000  | 0.2269860  | -0.8567680 |
| 24 H | -1.9899780 | -2.8079960 | -0.5483130 |
| 25 H | -4.3869650 | -2.6905200 | -0.0466210 |
| 26 H | -4.1495310 | 1.5464290  | 0.1127960  |
| 27 H | -1.7546820 | 1.4312150  | -0.3894720 |
| 28 H | 2.9777860  | -0.8298280 | 2.5113380  |
| 29 N | 3.4482370  | 0.0631260  | 2.3477810  |
| 30 H | 3.9713260  | 0.3568030  | 3.1620440  |
| 31 H | 4.0748580  | -0.1732160 | 1.5430570  |
| 32 C | 2.4363550  | 1.0928120  | 1.8846350  |
| 33 C | 3.1556050  | 2.2021210  | 1.1199420  |
| 34 O | 2.1622790  | 3.1246060  | 0.6194840  |
| 35 P | 1.4070400  | 2.8173070  | -0.8171790 |
| 36 O | 1.5846590  | 1.2853500  | -1.0282780 |
| 37 O | -0.1549850 | 3.0612400  | -0.3789970 |
| 38 C | -0.5873610 | 4.1986990  | 0.4194250  |
| 39 O | 1.8539210  | 3.7989930  | -1.9151070 |
| 40 H | 1.9048330  | 1.4738850  | 2.7396870  |
| 41 H | 1.7741720  | 0.5814840  | 1.2103130  |
| 42 H | 3.7144560  | 1.7578860  | 0.3106130  |
| 43 H | 3.8128470  | 2.7651720  | 1.7603480  |
| 44 H | -0.0643110 | 4.2059600  | 1.3620350  |
| 45 H | -1.6451150 | 4.0763340  | 0.5757840  |
| 46 H | -0.3989450 | 5.1211670  | -0.1113260 |

Table S11 - Cartesian coordinates (given in Angstroms) generated for structure E (Figure S218), calculated at HF/3-21G level, after energy minimisation calculations.

| Atom | X          | Y          | Z          |
|------|------------|------------|------------|
| 1 O  | 1.9687590  | -3.2273150 | 1.2730920  |
| 2 S  | 3.1020920  | -2.7980880 | 0.2695200  |
| 3 C  | 2.2961560  | -2.2448760 | -1.2841820 |
| 4 N  | 1.3677420  | -1.2060880 | -1.0200800 |
| 5 C  | 0.0490850  | -1.5082200 | -0.8456980 |
| 6 N  | -0.7021030 | -0.4472790 | -0.4359970 |
| 7 C  | -2.0825050 | -0.4181620 | -0.2662630 |
| 8 C  | -2.9378930 | -1.4914970 | -0.5144400 |
| 9 C  | -4.2965310 | -1.3493130 | -0.3192470 |
| 10 C | -4.8252680 | -0.1539230 | 0.1222200  |
| 11 C | -6.2732780 | -0.0324890 | 0.3802910  |
| 13 F | -6.6260710 | -0.3508520 | 1.6548060  |
| 14 F | -6.7212230 | 1.2315840  | 0.1853840  |
| 15 C | -3.9845990 | 0.9182390  | 0.3688460  |
| 16 C | -2.6305350 | 0.7918460  | 0.1777240  |
| 17 O | -0.3954090 | -2.6370170 | -1.0610370 |
| 18 O | 3.9003020  | -1.5395580 | 0.8169180  |
| 19 O | 4.0606530  | -3.9653800 | -0.1696780 |
| 20 H | 1.8079010  | -3.1137300 | -1.6860040 |
| 21 H | 3.0958800  | -1.9197970 | -1.9273450 |
| 22 H | 1.7116760  | -0.2509640 | -1.0220910 |
| 23 H | -0.2307410 | 0.4240220  | -0.1789890 |
| 24 H | -2.5284720 | -2.4136280 | -0.8505380 |
| 25 H | -4.9456060 | -2.1773460 | -0.5206870 |
| 26 H | -4.3911240 | 1.8519900  | 0.7006980  |
| 27 H | -1.9684700 | 1.6121380  | 0.3621870  |
| 28 H | 5.6778580  | 0.9947930  | 1.7081000  |
| 29 H | 5.6949580  | 0.6971690  | -0.7477260 |
| 30 C | 4.9673160  | 1.4903490  | 1.0661080  |
| 31 H | 5.3212990  | 2.4758680  | 0.8129210  |
| 32 N | 4.8462230  | 0.6703260  | -0.2000860 |
| 33 H | 4.6012760  | -0.3134330 | 0.0766370  |
| 34 C | 3.6120750  | 1.5789100  | 1.7630270  |
| 35 H | 4.0172090  | 1.0124330  | -0.7496450 |
| 36 H | 3.7546250  | 1.8894670  | 2.7835630  |
| 37 H | 3.1316570  | 0.6123800  | 1.7404850  |
| 38 O | 2.7794660  | 2.6093650  | 1.1599510  |
| 39 O | 2.4910660  | 1.3804930  | -1.0771140 |
| 40 P | 1.7741780  | 2.3832260  | -0.1081980 |
| 41 O | 0.3443500  | 1.9651870  | 0.3278800  |
| 42 O | 1.7732770  | 3.8948420  | -0.7037450 |
| 43 H | 0.6236580  | 4.2106440  | -2.4158950 |
| 44 C | 0.6266710  | 4.4957490  | -1.3745240 |
| 45 H | 0.7442620  | 5.5617090  | -1.2831220 |
| 46 H | -0.2879290 | 4.1739090  | -0.9022260 |

Table S12 - Cartesian coordinates (given in Angstroms) generated for structure **F** (Figure S218), calculated at HF/3-21G level, after energy minimisation calculations.

| Atom | X          | Y          | Z          |
|------|------------|------------|------------|
| 1 O  | -3.4772110 | -4.0376160 | -0.5359890 |
| 2 S  | -3.1546650 | -2.5254670 | -0.2332080 |
| 3 C  | -2.3690820 | -1.8145880 | -1.7773380 |
| 4 N  | -1.4351410 | -0.8075460 | -1.4542530 |
| 5 C  | -0.1552070 | -1.1865990 | -1.1622740 |
| 6 N  | 0.6468930  | -0.1723700 | -0.7306000 |
| 7 C  | 2.0077890  | -0.2547490 | -0.4365430 |
| 8 C  | 2.7899410  | -1.3963050 | -0.6048270 |
| 9 C  | 4.1347380  | -1.3608680 | -0.2961090 |
| 10 C | 4.7187410  | -0.2062260 | 0.1817780  |
| 11 C | 6.1682220  | -0.1674040 | 0.4577520  |
| 12 F | 6.6492520  | -1.3775370 | 0.8316360  |
| 13 F | 6.9148680  | 0.2062080  | -0.6159530 |
| 14 F | 6.4766700  | 0.7145990  | 1.4390610  |
| 15 C | 3.9474980  | 0.9293670  | 0.3612560  |
| 16 C | 2.6080340  | 0.9095720  | 0.0578910  |
| 17 O | 0.2143860  | -2.3534670 | -1.3018010 |
| 18 O | -4.4719090 | -1.6610570 | 0.0479640  |
| 19 O | -2.1348840 | -2.3147750 | 0.9738840  |
| 20 H | -3.1978890 | -1.4353890 | -2.3490190 |
| 21 H | -1.9077910 | -2.6688570 | -2.2377350 |
| 22 H | -1.7393440 | 0.1717220  | -1.4619850 |
| 23 H | 0.2507660  | 0.7467890  | -0.5439060 |
| 24 H | 2.3364100  | -2.2891120 | -0.9621630 |
| 25 H | 4.7257950  | -2.2453830 | -0.4214600 |
| 26 H | 4.3930850  | 1.8233490  | 0.7476990  |
| 27 H | 1.9942560  | 1.7746320  | 0.2010880  |
| 28 H | -3.0881660 | -1.5743710 | 2.4021690  |
| 29 N | -3.9242540 | -0.9979190 | 2.5836020  |
| 30 H | -4.4941930 | -1.2207110 | 1.7413080  |
| 31 H | -4.3869870 | -1.2789600 | 3.4374100  |
| 32 C | -3.5536130 | 0.4755410  | 2.5841340  |
| 33 C | -2.9696340 | 0.7655600  | 1.2137580  |
| 34 O | -2.5030160 | 2.1384970  | 1.2114750  |
| 35 P | -1.6916730 | 2.5908610  | -0.1527870 |
| 36 O | -2.3061230 | 1.7967200  | -1.3432110 |
| 37 O | -2.1234080 | 4.1605090  | -0.2234150 |
| 38 C | -2.3740340 | 4.8343920  | -1.4912960 |
| 39 O | -0.1599280 | 2.4106790  | 0.0472170  |
| 40 H | -2.8272530 | 0.6428750  | 3.3610580  |
| 41 H | -4.4453270 | 1.0497700  | 2.7704210  |
| 42 H | -3.7048690 | 0.6203140  | 0.4455520  |
| 43 H | -2.1498460 | 0.0901330  | 1.0352650  |
| 44 H | -3.0206870 | 5.6677210  | -1.2761580 |
| 45 H | -2.8486070 | 4.1542430  | -2.1806530 |
| 46 H | -1.4428440 | 5.1891500  | -1.9077720 |

Table S13 - Cartesian coordinates (given in Angstroms) generated for structure **G** (Figure S219), calculated at HF/3-21G level, after energy minimisation calculations.

| Atom | X          | Y          | Z          |
|------|------------|------------|------------|
| 1 O  | 4.2061910  | -1.2960630 | -0.2561230 |
| 2 S  | 3.1520740  | -2.4766460 | -0.1829840 |
| 3 C  | 2.1839990  | -2.3767500 | -1.7552530 |
| 4 N  | 1.2021860  | -1.3704740 | -1.6337350 |
| 5 C  | -0.0636050 | -1.7051590 | -1.2410950 |
| 6 N  | -0.8138330 | -0.5984070 | -0.9832200 |
| 7 C  | -2.1471160 | -0.5347730 | -0.6129680 |
| 8 C  | -2.9801830 | -1.6475860 | -0.4971600 |
| 9 C  | -4.2998810 | -1.4854670 | -0.1306030 |
| 10 C | -4.8097270 | -0.2289000 | 0.1254570  |
| 11 C | -6.2082270 | -0.0716650 | 0.5691050  |
| 12 F | -7.0095760 | -1.0536230 | 0.0899590  |
| 13 F | -6.3567890 | -0.1067490 | 1.9208980  |
| 14 F | -6.7374740 | 1.1130250  | 0.1777210  |
| 15 C | -3.9893270 | 0.8808460  | 0.0127220  |
| 16 C | -2.6720060 | 0.7374590  | -0.3515480 |
| 17 O | -0.4514910 | -2.8708150 | -1.1652320 |
| 18 O | 3.8362200  | -3.8929250 | -0.1322820 |
| 19 O | 2.1024500  | -2.2307770 | 0.9780260  |
| 20 H | 1.7306680  | -3.3420010 | -1.8850960 |
| 21 H | 2.9119450  | -2.1675680 | -2.5197570 |
| 22 H | 1.4487780  | -0.3855780 | -1.6283850 |
| 23 H | -0.2924270 | 0.2783160  | -1.0606370 |
| 24 H | -2.5812460 | -2.6146050 | -0.6936690 |
| 25 H | -4.9346810 | -2.3447660 | -0.0531020 |
| 26 H | -4.3845710 | 1.8581580  | 0.2029610  |
| 27 H | -2.0365710 | 1.5995300  | -0.4305620 |
| 28 C | 3.8433790  | 0.1568750  | 2.7380380  |
| 29 C | 3.4339240  | 1.3178300  | 1.7922250  |
| 30 C | 1.9231180  | 1.3502290  | 1.6269990  |
| 31 O | 1.5593580  | 2.5836720  | 0.9484160  |
| 32 P | 0.9230680  | 2.6994840  | -0.5537070 |
| 33 O | -0.4855340 | 3.3383880  | -0.4953430 |
| 34 O | 1.9494870  | 3.7366540  | -1.2914510 |
| 35 C | 3.2025650  | 3.2820350  | -1.8820960 |
| 36 O | 1.0426080  | 1.3089460  | -1.2528480 |
| 37 O | 4.0916190  | 1.2376070  | 0.5142640  |
| 38 H | 3.7410670  | 2.2603740  | 2.2196900  |
| 39 H | 1.4372230  | 1.3594320  | 2.5861900  |
| 40 H | 1.5914060  | 0.4981900  | 1.0570520  |
| 41 H | 3.0014780  | 2.7113660  | -2.7769660 |
| 42 H | 3.7422470  | 2.6757210  | -1.1727260 |
| 43 H | 3.7589860  | 4.1711170  | -2.1300370 |
| 44 H | 4.1962930  | 0.5648050  | 3.6737710  |
| 45 H | 4.6585670  | -0.3773120 | 2.2671820  |
| 46 O | 2.7549760  | -0.7208360 | 3.0713330  |
| 47 H | 2.5365870  | -1.3174280 | 2.3165700  |
| 48 H | 4.0625810  | 0.3139600  | 0.1693260  |

Table S14 - Cartesian coordinates (given in Angstroms) generated for structure **H** (Figure S219), calculated at HF/3-21G level, after energy minimisation calculations.

| Atom | X          | Y          | Z          |
|------|------------|------------|------------|
| 1 O  | -3.7282970 | 4.0108590  | -0.1439650 |
| 2 S  | -3.0604940 | 2.5846440  | -0.1843250 |
| 3 C  | -2.1103290 | 2.4881430  | -1.7663270 |
| 4 N  | -1.1361490 | 1.4677550  | -1.6719970 |
| 5 C  | 0.1217360  | 1.7749740  | -1.2378080 |
| 6 N  | 0.8648670  | 0.6545420  | -1.0138780 |
| 7 C  | 2.1808900  | 0.5761370  | -0.5846860 |
| 8 C  | 3.0215760  | 1.6797370  | -0.4385580 |
| 9 C  | 4.3240180  | 1.5039350  | -0.0203140 |
| 10 C | 4.8094280  | 0.2425300  | 0.2584510  |
| 11 C | 6.1882280  | 0.0710370  | 0.7556080  |
| 12 F | 7.0195560  | 1.0388760  | 0.2994230  |
| 13 F | 6.2863940  | 0.1152400  | 2.1116530  |
| 14 F | 6.7160330  | -1.1233960 | 0.3931960  |
| 15 C | 3.9805060  | -0.8575880 | 0.1203010  |
| 16 C | 2.6796130  | -0.6999220 | -0.2942890 |
| 17 O | 0.5133060  | 2.9333870  | -1.0992860 |
| 18 O | -2.0299530 | 2.3188980  | 0.9855440  |
| 19 O | -4.1305800 | 1.4155140  | -0.3033580 |
| 20 H | -1.6471750 | 3.4497090  | -1.8889170 |
| 21 H | -2.8446410 | 2.2959490  | -2.5288020 |
| 22 H | -1.3862120 | 0.4888250  | -1.7405670 |
| 23 H | 0.3597790  | -0.2186200 | -1.1747070 |
| 24 H | 2.6414200  | 2.6509960  | -0.6501350 |
| 25 H | 4.9651260  | 2.3562970  | 0.0789810  |
| 26 H | 4.3551530  | -1.8383300 | 0.3331190  |
| 27 H | 2.0345240  | -1.5535110 | -0.3797730 |
| 28 C | -3.8414540 | 0.0575490  | 2.7246070  |
| 29 C | -2.9199330 | -1.1088530 | 2.3894650  |
| 30 C | -2.4383790 | -1.0329410 | 0.9546820  |
| 31 O | -1.7518040 | -2.3005150 | 0.7162360  |
| 32 P | -0.9423240 | -2.5994770 | -0.6777960 |
| 33 O | 0.4265050  | -3.2510940 | -0.3702320 |
| 34 O | -1.9681870 | -3.6565300 | -1.3968180 |
| 35 C | -2.1431220 | -3.6996400 | -2.8392000 |
| 36 O | -0.9410760 | -1.2831620 | -1.5185970 |
| 37 O | -3.6360460 | -2.3452490 | 2.5809970  |
| 38 H | -2.0588290 | -1.0713980 | 3.0480310  |
| 39 H | -1.7785020 | -0.1966800 | 0.8109250  |
| 40 H | -3.2770490 | -0.9464490 | 0.2876000  |
| 41 H | -1.3148900 | -4.2187220 | -3.3009450 |
| 42 H | -2.2082800 | -2.6981290 | -3.2337540 |
| 43 H | -3.0572370 | -4.2377670 | -3.0253760 |
| 44 H | -3.2560010 | 0.9659890  | 2.6759270  |
| 45 H | -4.2106610 | -0.0767120 | 3.7319900  |
| 46 O | -4.9738560 | 0.1291900  | 1.8453000  |
| 47 H | -4.7263610 | 0.6400310  | 1.0370570  |
| 48 H | -3.1430500 | -3.0271520 | 2.0999970  |

Table S15 - Cartesian coordinates (given in Angstroms) generated for structure I (Figure S219), calculated at HF/3-21G level, after energy minimisation calculations.

| Atom | X          | Y          | Z          |
|------|------------|------------|------------|
| 1 O  | -3.9974000 | 4.0997540  | -0.0346190 |
| 2 S  | -2.9183660 | 3.0197780  | 0.3467010  |
| 3 C  | -2.0569580 | 2.6627080  | -1.2321140 |
| 4 N  | -1.0987480 | 1.6344090  | -1.0653940 |
| 5 C  | 0.2218650  | 1.9156830  | -0.8777440 |
| 6 N  | 0.9442000  | 0.7779420  | -0.6601080 |
| 7 C  | 2.2987430  | 0.6616410  | -0.4049390 |
| 8 C  | 3.2013070  | 1.7247860  | -0.4372050 |
| 9 C  | 4.5377360  | 1.5013840  | -0.1803000 |
| 10 C | 4.9974300  | 0.2325800  | 0.1104110  |
| 11 C | 6.4208140  | 0.0143760  | 0.4323630  |
| 12 F | 7.2280720  | 0.9042160  | -0.1939450 |
| 13 F | 6.7034150  | 0.1352080  | 1.7574430  |
| 14 F | 6.8367500  | -1.2278510 | 0.0852190  |
| 15 C | 4.1085070  | -0.8281560 | 0.1482530  |
| 16 C | 2.7741020  | -0.6207510 | -0.1033990 |
| 17 O | 0.6819610  | 3.0565900  | -0.9209920 |
| 18 O | -1.8488510 | 3.5203540  | 1.3875640  |
| 19 O | -3.5583140 | 1.6434130  | 0.7989410  |
| 20 H | -1.5910430 | 3.5831750  | -1.5348390 |
| 21 H | -2.8372520 | 2.3820580  | -1.9189290 |
| 22 H | -1.3780380 | 0.6623170  | -1.0541050 |
| 23 H | 0.3970540  | -0.0862200 | -0.7018020 |
| 24 H | 2.8413880  | 2.7008270  | -0.6621020 |
| 25 H | 5.2255360  | 2.3217180  | -0.2180440 |
| 26 H | 4.4620860  | -1.8147850 | 0.3686770  |
| 27 H | 2.0808850  | -1.4375830 | -0.0585930 |
| 28 C | -5.6119090 | -1.1416830 | 0.8624040  |
| 29 C | -4.3889550 | -2.0391860 | 0.6536060  |
| 30 C | -3.1323910 | -1.4145770 | 1.2577830  |
| 31 O | -1.9898780 | -2.3139400 | 1.0971360  |
| 32 P | -1.2116460 | -2.5083710 | -0.3276700 |
| 33 O | -0.9121530 | -1.1101130 | -0.9421310 |
| 34 O | 0.1926540  | -3.1596440 | 0.2049970  |
| 35 C | 0.7301360  | -4.4202950 | -0.2880810 |
| 36 O | -1.9737130 | -3.5473810 | -1.1993410 |
| 37 O | -4.2520240 | -2.2421160 | -0.7613310 |
| 38 H | -4.5723170 | -2.9771110 | 1.1685980  |
| 39 H | -3.2521200 | -1.2894090 | 2.3219290  |
| 40 H | -2.9168450 | -0.4644860 | 0.8025440  |
| 41 H | 1.1393630  | -4.9470530 | 0.5581370  |
| 42 H | 1.5102360  | -4.2147100 | -1.0050540 |
| 43 H | -0.0524700 | -4.9984830 | -0.7517190 |
| 44 H | -5.7250670 | -0.9481950 | 1.9260750  |
| 45 H | -6.4808810 | -1.6931000 | 0.5329810  |
| 46 O | -5.5899170 | 0.0656710  | 0.0961520  |
| 47 H | -4.8599410 | 0.6709270  | 0.3558110  |
| 48 H | -3.5758240 | -2.9231710 | -0.9789200 |



Table S16 - Cartesian coordinates (given in Angstroms) generated for structure J (Figure S219), calculated at HF/3-21G level, after energy minimisation calculations.

| Atom | X          | Y          | Z          |
|------|------------|------------|------------|
| 1 O  | -3.5694980 | -1.3640170 | -0.3507670 |
| 2 S  | -2.9909280 | -2.8100650 | -0.0363630 |
| 3 C  | -1.9803090 | -2.5369860 | 1.4709400  |
| 4 N  | -1.0280540 | -1.5241590 | 1.2193230  |
| 5 C  | 0.2809120  | -1.8180220 | 0.9759700  |
| 6 N  | 0.9813040  | -0.6919760 | 0.6561240  |
| 7 C  | 2.3290610  | -0.5680900 | 0.3728040  |
| 8 C  | 3.2315980  | -1.6316560 | 0.3690650  |
| 9 C  | 4.5600660  | -1.4067860 | 0.0744940  |
| 10 C | 5.0107730  | -0.1354460 | -0.2178570 |
| 11 C | 6.4229370  | 0.0857400  | -0.5832900 |
| 12 F | 7.2485660  | -0.8185310 | -0.0029640 |
| 13 F | 6.6604850  | -0.0085670 | -1.9195370 |
| 14 F | 6.8551900  | 1.3195800  | -0.2256770 |
| 15 C | 4.1218880  | 0.9266490  | -0.2125850 |
| 16 C | 2.7951410  | 0.7205830  | 0.0785530  |
| 17 O | 0.7456290  | -2.9557170 | 1.0580560  |
| 18 O | -4.1179140 | -3.8278400 | 0.3699270  |
| 19 O | -2.0472920 | -3.3114550 | -1.1909340 |
| 20 H | -1.5035610 | -3.4712400 | 1.7060800  |
| 21 H | -2.6903330 | -2.2591290 | 2.2314100  |
| 22 H | -1.3189650 | -0.5557320 | 1.1178050  |
| 23 H | 0.4064720  | 0.1565690  | 0.6280530  |
| 24 H | 2.8782630  | -2.6094370 | 0.5978460  |
| 25 H | 5.2479480  | -2.2278900 | 0.0820650  |
| 26 H | 4.4717310  | 1.9160490  | -0.4274100 |
| 27 H | 2.1071230  | 1.5452070  | 0.0847660  |
| 28 C | -4.9657530 | 0.9746110  | -2.0408760 |
| 29 C | -4.1293170 | 1.7729000  | -1.0373140 |
| 30 C | -2.7015590 | 1.9061970  | -1.5453950 |
| 31 O | -2.0030070 | 2.9264960  | -0.7848850 |
| 32 P | -0.9442220 | 2.6317280  | 0.4288730  |
| 33 O | 0.4313830  | 3.2635740  | 0.1071420  |
| 34 O | -1.6214470 | 3.4211660  | 1.6914140  |
| 35 C | -2.5060620 | 2.7464930  | 2.6329880  |
| 36 O | -0.9663400 | 1.1049960  | 0.7392370  |
| 37 O | -4.1555990 | 1.1824940  | 0.2791200  |
| 38 H | -4.5535220 | 2.7595640  | -0.9298700 |
| 39 H | -2.6934300 | 2.2306010  | -2.5731790 |
| 40 H | -2.1960560 | 0.9610200  | -1.4526980 |
| 41 H | -1.9427640 | 2.0505910  | 3.2372070  |
| 42 H | -3.2800480 | 2.2233790  | 2.0969560  |
| 43 H | -2.9245420 | 3.5187180  | 3.2572900  |
| 44 H | -5.2160680 | 1.6108850  | -2.8777870 |
| 45 H | -5.8856620 | 0.6714060  | -1.5520950 |
| 46 O | -4.2477920 | -0.1487170 | -2.5793290 |
| 47 H | -3.9958670 | -0.7532360 | -1.8426910 |
| 48 H | -3.8446990 | 0.2534470  | 0.2336010  |

Table S17 - Cartesian coordinates (given in Angstroms) generated for structure **K** (Figure S219), calculated at HF/3-21G level, after energy minimisation calculations.

| Atom | X          | Y          | Z          |
|------|------------|------------|------------|
| 1 O  | 3.2117420  | -1.2702600 | 0.4151150  |
| 2 S  | 2.6557860  | -2.6846220 | -0.0308770 |
| 3 C  | 1.7191220  | -2.3695730 | -1.5800920 |
| 4 N  | 0.7866930  | -1.3276610 | -1.3513070 |
| 5 C  | -0.4951620 | -1.6162200 | -1.0008640 |
| 6 N  | -1.1517460 | -0.5454080 | -0.4597800 |
| 7 C  | -2.5097580 | -0.4478510 | -0.1944180 |
| 8 C  | -3.4622110 | -1.4199290 | -0.5048700 |
| 9 C  | -4.7930430 | -1.1970190 | -0.2167580 |
| 10 C | -5.1999790 | -0.0216880 | 0.3826270  |
| 11 C | -6.6184950 | 0.1796100  | 0.7345050  |
| 12 F | -7.4520030 | -0.4761540 | -0.1089670 |
| 13 F | -6.9389310 | -0.2631860 | 1.9802830  |
| 14 F | -6.9677590 | 1.4891100  | 0.7147980  |
| 15 C | -4.2628170 | 0.9478210  | 0.6973930  |
| 16 C | -2.9358800 | 0.7408170  | 0.4131370  |
| 17 O | -0.9950620 | -2.7308710 | -1.1686230 |
| 18 O | 3.7957630  | -3.6960970 | -0.4206760 |
| 19 O | 1.6316080  | -3.2457670 | 1.0257370  |
| 20 H | 1.2360240  | -3.2943350 | -1.8382910 |
| 21 H | 2.4567860  | -2.0944940 | -2.3139900 |
| 22 H | 1.1172820  | -0.3644740 | -1.4665000 |
| 23 H | -0.5916220 | 0.2473200  | -0.1046200 |
| 24 H | -3.1453260 | -2.3307070 | -0.9531910 |
| 25 H | -5.5176340 | -1.9449980 | -0.4684460 |
| 26 H | -4.5747110 | 1.8652330  | 1.1538700  |
| 27 H | -2.1988280 | 1.4820110  | 0.6455550  |
| 28 C | 5.3948280  | 0.6602960  | 2.1581540  |
| 29 C | 4.7010300  | 1.4420340  | 1.0415000  |
| 30 C | 3.2536790  | 1.7367090  | 1.3862190  |
| 31 O | 2.6880230  | 2.5623120  | 0.3288400  |
| 32 P | 1.3649560  | 2.1112910  | -0.5186050 |
| 33 O | 0.3098830  | 1.5231930  | 0.4670010  |
| 34 O | 0.9097960  | 3.5874260  | -1.0548690 |
| 35 C | 0.4314470  | 3.8169730  | -2.4068290 |
| 36 O | 1.7132560  | 1.2160140  | -1.7409270 |
| 37 O | 4.8328450  | 0.6681460  | -0.1659750 |
| 38 H | 5.2250790  | 2.3710880  | 0.8750950  |
| 39 H | 3.1933020  | 2.3000450  | 2.3051120  |
| 40 H | 2.6994040  | 0.8161450  | 1.4804240  |
| 41 H | -0.5995840 | 3.5043950  | -2.4961860 |
| 42 H | 1.0333180  | 3.2727870  | -3.1168230 |
| 43 H | 0.5076350  | 4.8765520  | -2.5844490 |
| 44 H | 4.8109100  | -0.2245240 | 2.3835530  |
| 45 H | 5.5126960  | 1.2558470  | 3.0501220  |
| 46 O | 6.7109180  | 0.2916750  | 1.6899420  |
| 47 H | 6.5976810  | 0.0799630  | 0.7489200  |
| 48 H | 4.2475260  | -0.1277800 | -0.0872220 |

Table S18 - Cartesian coordinates (given in Angstroms) generated for structure **L** (Figure S219), calculated at HF/3-21G level, after energy minimisation calculations.

| Atom | X          | Y          | Z          |
|------|------------|------------|------------|
| 1 O  | 4.0724620  | -1.1581120 | -0.5791910 |
| 2 S  | 2.9564960  | -2.2779720 | -0.6847100 |
| 3 C  | 1.9503840  | -1.8523820 | -2.1851950 |
| 4 N  | 1.0116800  | -0.8506820 | -1.8494480 |
| 5 C  | -0.2331080 | -1.2351880 | -1.4419770 |
| 6 N  | -0.9656130 | -0.2326270 | -0.8812360 |
| 7 C  | -2.3072140 | -0.2848230 | -0.5191300 |
| 8 C  | -3.1490670 | -1.3766720 | -0.7304930 |
| 9 C  | -4.4738720 | -1.3096120 | -0.3500300 |
| 10 C | -4.9812570 | -0.1723850 | 0.2438670  |
| 11 C | -6.3855740 | -0.1335670 | 0.6950420  |
| 12 F | -7.1850650 | -0.9309600 | -0.0538850 |
| 13 F | -6.5558110 | -0.5490500 | 1.9792030  |
| 14 F | -6.9015010 | 1.1188820  | 0.6488630  |
| 15 C | -4.1529970 | 0.9163120  | 0.4598330  |
| 16 C | -2.8331960 | 0.8649850  | 0.0845740  |
| 17 O | -0.6380730 | -2.3896420 | -1.5967360 |
| 18 O | 3.5485570  | -3.7204830 | -0.9059790 |
| 19 O | 1.9446630  | -2.1892740 | 0.5412970  |
| 20 H | 1.4681800  | -2.7676940 | -2.4733500 |
| 21 H | 2.6667930  | -1.5225350 | -2.9171920 |
| 22 H | 1.3220870  | 0.1260080  | -1.8580260 |
| 23 H | -0.4981720 | 0.6389000  | -0.6075840 |
| 24 H | -2.7544340 | -2.2561990 | -1.1795690 |
| 25 H | -5.1144550 | -2.1499610 | -0.5260420 |
| 26 H | -4.5443030 | 1.8049280  | 0.9122020  |
| 27 H | -2.1779480 | 1.6957480  | 0.2454930  |
| 28 C | 3.5507660  | -0.5269340 | 3.3184970  |
| 29 C | 3.6844780  | 0.6669010  | 2.3620650  |
| 30 C | 2.3690640  | 0.9394790  | 1.6433200  |
| 31 O | 2.5724860  | 2.0977530  | 0.7828890  |
| 32 P | 1.5327310  | 2.4261000  | -0.4358070 |
| 33 O | 0.0867890  | 2.1042380  | 0.0449780  |
| 34 O | 1.7938710  | 4.0329730  | -0.5558470 |
| 35 C | 1.6892640  | 4.7511760  | -1.8158240 |
| 36 O | 1.9587370  | 1.7267420  | -1.7595790 |
| 37 O | 4.7651120  | 0.4528270  | 1.4522860  |
| 38 H | 3.9286670  | 1.5444050  | 2.9447670  |
| 39 H | 1.5922540  | 1.1646150  | 2.3585210  |
| 40 H | 2.0740080  | 0.0827790  | 1.0600280  |
| 41 H | 0.6599990  | 5.0238310  | -2.0002750 |
| 42 H | 2.0532760  | 4.1353740  | -2.6232700 |
| 43 H | 2.2909350  | 5.6392680  | -1.7191800 |
| 44 H | 2.6648340  | -0.4040970 | 3.9355000  |
| 45 H | 4.4101610  | -0.5294020 | 3.9736350  |
| 46 O | 3.5678820  | -1.7940720 | 2.6470910  |
| 47 H | 2.8596350  | -1.8998980 | 1.9751560  |
| 48 H | 4.5165950  | -0.2240380 | 0.7818540  |

Table S19 - Cartesian coordinates (given in Angstroms) generated for structure **M** (Figure S219), calculated at HF/3-21G level, after energy minimisation calculations.

| Atom | X          | Y          | Z          |
|------|------------|------------|------------|
| 1 O  | 3.0556030  | -4.2096070 | -0.5394800 |
| 2 S  | 2.7543530  | -2.6694740 | -0.3889500 |
| 3 C  | 1.8222240  | -2.1739460 | -1.9185450 |
| 4 N  | 0.9423700  | -1.1010850 | -1.6410640 |
| 5 C  | -0.3200950 | -1.3953580 | -1.2235170 |
| 6 N  | -1.0516590 | -0.3127190 | -0.8305820 |
| 7 C  | -2.3916310 | -0.3089820 | -0.4517200 |
| 8 C  | -3.2324210 | -1.4214070 | -0.4845050 |
| 9 C  | -4.5538030 | -1.2983230 | -0.1061720 |
| 10 C | -5.0591320 | -0.0840180 | 0.3098300  |
| 11 C | -6.4602330 | 0.0222260  | 0.7604670  |
| 12 F | -7.2634310 | -0.8809370 | 0.1480350  |
| 13 F | -6.6200140 | -0.1926040 | 2.0941660  |
| 14 F | -6.9789070 | 1.2523950  | 0.5273030  |
| 15 C | -4.2318690 | 1.0256540  | 0.3480480  |
| 16 C | -2.9149410 | 0.9190910  | -0.0266010 |
| 17 O | -0.7491780 | -2.5523180 | -1.2304140 |
| 18 O | 1.8519920  | -2.3130960 | 0.8602620  |
| 19 O | 4.0825000  | -1.7959370 | -0.4197120 |
| 20 H | 1.2888780  | -3.0602510 | -2.2080210 |
| 21 H | 2.5840550  | -1.9049810 | -2.6291790 |
| 22 H | 1.3052350  | -0.1450420 | -1.7097780 |
| 23 H | -0.6034520 | 0.6006260  | -0.7458450 |
| 24 H | -2.8405510 | -2.3580580 | -0.7999050 |
| 25 H | -5.1934030 | -2.1567020 | -0.1457870 |
| 26 H | -4.6212750 | 1.9729090  | 0.6618380  |
| 27 H | -2.2613210 | 1.7661120  | -0.0012730 |
| 28 C | 4.1575150  | -0.4679800 | 2.6850790  |
| 29 C | 3.4214410  | 0.8323780  | 2.3781960  |
| 30 C | 2.8714810  | 0.8099510  | 0.9721760  |
| 31 O | 2.2996400  | 2.1399140  | 0.7390030  |
| 32 P | 1.4472210  | 2.3753050  | -0.6434940 |
| 33 O | -0.0795700 | 2.2475460  | -0.3695970 |
| 34 O | 1.8686860  | 3.9197970  | -0.9664270 |
| 35 C | 2.0204720  | 4.4023310  | -2.3313620 |
| 36 O | 2.0103930  | 1.4236220  | -1.7385230 |
| 37 O | 4.3321610  | 1.9424290  | 2.5159070  |
| 38 H | 2.5979600  | 0.9364970  | 3.0760570  |
| 39 H | 2.1231760  | 0.0429020  | 0.8743570  |
| 40 H | 3.6568690  | 0.6353040  | 0.2626440  |
| 41 H | 1.0544270  | 4.6555120  | -2.7438510 |
| 42 H | 2.4894200  | 3.6449380  | -2.9393700 |
| 43 H | 2.6382350  | 5.2828190  | -2.2818670 |
| 44 H | 3.4233880  | -1.2643870 | 2.6996170  |
| 45 H | 4.6098920  | -0.3847530 | 3.6633830  |
| 46 O | 5.2002610  | -0.7492180 | 1.7412160  |
| 47 H | 4.8199870  | -1.1887980 | 0.9420130  |
| 48 H | 3.9227520  | 2.6995630  | 2.0704380  |

Table S20 - Cartesian coordinates (given in Angstroms) generated for structure **N** (Figure S219), calculated at HF/3-21G level, after energy minimisation calculations.

| Atom | X          | Y          | Z          |
|------|------------|------------|------------|
| 1 O  | 3.7140740  | -3.9132620 | -0.7065010 |
| 2 S  | 2.7752820  | -2.7479970 | -0.2232300 |
| 3 C  | 1.8431180  | -2.2017660 | -1.7097870 |
| 4 N  | 0.9357240  | -1.1771970 | -1.3528450 |
| 5 C  | -0.3540850 | -1.4917160 | -1.0511380 |
| 6 N  | -1.0511860 | -0.4459600 | -0.5177710 |
| 7 C  | -2.4143460 | -0.4003280 | -0.2529500 |
| 8 C  | -3.3080620 | -1.4446330 | -0.4915760 |
| 9 C  | -4.6482600 | -1.2840210 | -0.2052300 |
| 10 C | -5.1212450 | -0.0992240 | 0.3205800  |
| 11 C | -6.5474380 | 0.0402450  | 0.6723420  |
| 12 F | -7.3444810 | -0.7241930 | -0.1128730 |
| 13 F | -6.8315970 | -0.3301700 | 1.9501270  |
| 14 F | -6.9765280 | 1.3212250  | 0.5630480  |
| 15 C | -4.2419620 | 0.9434260  | 0.5610470  |
| 16 C | -2.9060370 | 0.7992480  | 0.2787250  |
| 17 O | -0.8286780 | -2.6102590 | -1.2628000 |
| 18 O | 1.7357570  | -3.1637490 | 0.8818910  |
| 19 O | 3.6005070  | -1.4664390 | 0.2250390  |
| 20 H | 1.3391980  | -3.0762670 | -2.0796780 |
| 21 H | 2.5903420  | -1.8570840 | -2.4034760 |
| 22 H | 1.2692300  | -0.2052100 | -1.3938450 |
| 23 H | -0.5400110 | 0.3955100  | -0.2298650 |
| 24 H | -2.9405120 | -2.3590130 | -0.8914930 |
| 25 H | -5.3275620 | -2.0887900 | -0.4014580 |
| 26 H | -4.6058860 | 1.8692410  | 0.9582780  |
| 27 H | -2.2125040 | 1.5952710  | 0.4542650  |
| 28 C | 5.2822100  | 0.5055270  | 2.1998960  |
| 29 C | 4.6139130  | 1.4199110  | 1.1679170  |
| 30 C | 3.1534930  | 1.6288200  | 1.5377410  |
| 31 O | 2.5853650  | 2.6402430  | 0.6590310  |
| 32 P | 1.3864640  | 2.3301360  | -0.4053860 |
| 33 O | 0.1037340  | 1.8834430  | 0.3596100  |
| 34 O | 1.2314390  | 3.8393440  | -1.0121490 |
| 35 C | 0.9198690  | 4.0821750  | -2.4107490 |
| 36 O | 1.8308870  | 1.3640790  | -1.5400790 |
| 37 O | 4.7419120  | 0.9066660  | -0.1678400 |
| 38 H | 5.1147740  | 2.3767410  | 1.1724480  |
| 39 H | 3.0611280  | 1.9921360  | 2.5487380  |
| 40 H | 2.6236770  | 0.6943700  | 1.4442940  |
| 41 H | -0.1481700 | 4.0259050  | -2.5669940 |
| 42 H | 1.4158620  | 3.3539140  | -3.0323500 |
| 43 H | 1.2689930  | 5.0749930  | -2.6401780 |
| 44 H | 5.4721910  | 1.0654880  | 3.1045950  |
| 45 H | 6.2328460  | 0.1794790  | 1.7910810  |
| 46 O | 4.4511220  | -0.6072950 | 2.5742030  |
| 47 H | 4.1525360  | -1.0863340 | 1.7667480  |
| 48 H | 4.2581190  | 0.0577550  | -0.2412050 |

Table S21 - Cartesian coordinates (given in Angstroms) generated for structure **O** (Figure S220), calculated at HF/3-21G level, after energy minimisation calculations.

| Atom |   | X          | Y          | Z          |
|------|---|------------|------------|------------|
| 1    | C | -7.2618430 | -0.8990310 | -0.4926540 |
| 2    | N | -5.9626240 | -1.5230690 | -0.9700010 |
| 3    | C | -6.2311440 | -2.9680170 | -1.3391780 |
| 4    | C | -5.4836580 | -0.7649570 | -2.1909800 |
| 5    | C | -4.9554100 | -1.4238500 | 0.1655680  |
| 6    | C | -3.5577690 | -1.9561150 | -0.1544130 |
| 7    | O | -2.8644110 | -1.8275300 | 1.1049090  |
| 8    | P | -1.4322590 | -1.0248000 | 1.2577730  |
| 9    | O | -1.2540280 | -0.1601030 | -0.0289890 |
| 10   | O | -1.8428140 | -0.0754590 | 2.5221450  |
| 11   | C | -0.9328130 | 0.9278460  | 3.0716170  |
| 12   | O | -0.2880800 | -1.9996600 | 1.6231260  |
| 13   | H | -5.3598050 | -1.9780280 | 0.9969190  |
| 14   | H | -4.8836380 | -0.3812050 | 0.4315880  |
| 15   | H | -3.0559410 | -1.3675130 | -0.9020150 |
| 16   | H | -3.5682540 | -2.9961700 | -0.4326770 |
| 17   | H | -1.3968170 | 1.2869240  | 3.9757420  |
| 18   | H | -0.7895610 | 1.7399680  | 2.3745160  |
| 19   | H | 0.0182560  | 0.4702630  | 3.3114300  |
| 20   | H | -6.5482800 | -3.4955640 | -0.4538490 |
| 21   | H | -5.3335240 | -3.4071280 | -1.7393010 |
| 22   | H | -7.0098200 | -2.9864790 | -2.0845100 |
| 23   | H | -7.0759070 | 0.1338200  | -0.2464410 |
| 24   | H | -7.6023660 | -1.4380600 | 0.3764890  |
| 25   | H | -7.9863410 | -0.9711260 | -1.2875630 |
| 26   | H | -5.2693130 | 0.2515600  | -1.9016990 |
| 27   | H | -6.2674910 | -0.7861110 | -2.9308160 |
| 28   | H | -4.6004280 | -1.2413820 | -2.5810880 |
| 29   | C | 4.8115930  | 0.2771620  | -0.9666630 |
| 30   | C | 3.5986540  | 0.9221290  | -1.0816690 |
| 31   | C | 2.4369400  | 0.3229760  | -0.5900280 |
| 32   | C | 2.5360550  | -0.9300830 | 0.0313090  |
| 33   | C | 3.7526410  | -1.5602260 | 0.1357390  |
| 34   | C | 4.8969970  | -0.9624220 | -0.3649190 |
| 35   | C | 6.2065550  | -1.6204780 | -0.2001770 |
| 36   | N | 1.1762320  | 0.8815050  | -0.6876110 |
| 37   | C | 0.8472150  | 2.1677410  | -1.0477590 |
| 38   | O | 1.6727270  | 3.0336470  | -1.3510850 |
| 39   | N | -0.4899050 | 2.3647520  | -1.0661230 |
| 40   | C | -1.0085380 | 3.7147650  | -0.9698130 |
| 41   | C | -0.8497980 | 4.3133050  | 0.4499610  |
| 42   | O | -0.2199310 | 3.6357650  | 1.2989740  |
| 43   | O | -1.3613500 | 5.4464110  | 0.5984320  |
| 44   | F | 7.0858320  | -1.2591840 | -1.1659890 |
| 45   | F | 6.1059520  | -2.9721960 | -0.2270300 |
| 46   | F | 6.8197560  | -1.3274970 | 0.9788540  |
| 47   | H | 5.6940660  | 0.7412950  | -1.3583600 |
| 48   | H | 3.5289450  | 1.8823700  | -1.5346930 |
| 49   | H | 1.6571820  | -1.3810530 | 0.4510700  |
| 50   | H | 3.8143650  | -2.5208420 | 0.6062520  |
| 51   | H | 0.3804150  | 0.3051450  | -0.4189830 |
| 52   | H | -1.0543950 | 1.6124370  | -0.7051100 |
| 53   | H | -2.0583450 | 3.7174650  | -1.2305770 |
| 54   | H | -0.4898890 | 4.3599510  | -1.6650350 |

Table S22 - Cartesian coordinates (given in Angstroms) generated for structure **P** (Figure S220), calculated at HF/3-21G level, after energy minimisation calculations.

| Atom |   | X          | Y          | Z          |
|------|---|------------|------------|------------|
| 1    | O | -2.5784940 | 2.3919150  | 0.2104090  |
| 2    | C | -2.9200990 | 2.9764690  | -0.8597980 |
| 3    | C | -2.2936210 | 2.4876240  | -2.1833500 |
| 4    | N | -1.3958030 | 1.3639420  | -2.0219090 |
| 5    | C | -0.1429370 | 1.5710500  | -1.5817940 |
| 6    | N | 0.5002190  | 0.4288870  | -1.1576170 |
| 7    | C | 1.8412300  | 0.2980680  | -0.8321220 |
| 8    | C | 2.7952130  | 1.3106370  | -0.9533810 |
| 9    | C | 4.1114510  | 1.0623810  | -0.6247890 |
| 10   | C | 4.5053680  | -0.1798920 | -0.1696120 |
| 11   | C | 5.9050800  | -0.4153840 | 0.2306480  |
| 12   | F | 6.7728300  | 0.3632370  | -0.4602110 |
| 13   | F | 6.1479050  | -0.1534250 | 1.5438360  |
| 14   | F | 6.2791330  | -1.7050000 | 0.0450610  |
| 15   | C | 3.5674630  | -1.1909510 | -0.0432740 |
| 16   | C | 2.2538990  | -0.9601160 | -0.3693310 |
| 17   | O | 0.3895580  | 2.6880080  | -1.5727010 |
| 18   | O | -3.7238370 | 3.9207550  | -0.9728450 |
| 19   | H | -1.7757140 | 3.3225250  | -2.6324570 |
| 20   | H | -3.1013850 | 2.2016030  | -2.8441320 |
| 21   | H | -1.8020880 | 0.4370460  | -2.0742390 |
| 22   | H | -0.0532060 | -0.4075840 | -0.9710820 |
| 23   | H | 2.4862870  | 2.2699200  | -1.2927810 |
| 24   | H | 4.8359510  | 1.8443620  | -0.7318810 |
| 25   | H | 3.8686260  | -2.1599870 | 0.3000120  |
| 26   | H | 1.5171790  | -1.7313140 | -0.2780940 |
| 27   | C | -1.1580930 | 0.0047470  | 4.3197670  |
| 28   | N | -1.7267750 | 0.4531910  | 2.9930520  |
| 29   | C | -2.8595800 | 1.4355970  | 3.2295230  |
| 30   | C | -0.6384320 | 1.1628070  | 2.2037260  |
| 31   | C | -2.2021410 | -0.7824340 | 2.2390250  |
| 32   | C | -3.1997910 | -0.4981840 | 1.1083260  |
| 33   | O | -3.2842910 | -1.7414220 | 0.3582460  |
| 34   | P | -2.2733560 | -2.0396400 | -0.9074810 |
| 35   | O | -0.8018800 | -1.9096720 | -0.4100040 |
| 36   | O | -2.6228100 | -3.6113750 | -1.1563800 |
| 37   | C | -3.9705840 | -4.1554860 | -1.1439250 |
| 38   | O | -2.6729460 | -1.1521630 | -2.1163270 |
| 39   | H | -2.6537710 | -1.4455940 | 2.9596180  |
| 40   | H | -1.3334130 | -1.2444350 | 1.8022100  |
| 41   | H | -2.8961460 | 0.3283000  | 0.4857710  |
| 42   | H | -4.1895180 | -0.3117250 | 1.4876550  |
| 43   | H | -4.5720500 | -3.6915730 | -1.9132290 |
| 44   | H | -4.4262800 | -3.9944010 | -0.1804310 |
| 45   | H | -3.8737630 | -5.2091220 | -1.3436130 |
| 46   | H | -3.6908690 | 0.9066990  | 3.6690510  |
| 47   | H | -3.1109100 | 1.8843890  | 2.2808520  |
| 48   | H | -2.5029960 | 2.1919070  | 3.9117860  |
| 49   | H | -0.3714940 | -0.7096500 | 4.1335060  |
| 50   | H | -1.9463910 | -0.4471330 | 4.9005150  |
| 51   | H | -0.7644170 | 0.8677420  | 4.8321600  |
| 52   | H | 0.1461880  | 0.4533820  | 1.9955150  |
| 53   | H | -0.2597250 | 1.9660210  | 2.8179580  |
| 54   | H | -1.0810190 | 1.5577990  | 1.3036790  |

Table S23 - Cartesian coordinates (given in Angstroms) generated for structure **Q** (Figure S221), calculated at HF/3-21G level, after energy minimisation calculations.

| Atom |   | X          | Y          | Z          |
|------|---|------------|------------|------------|
| 1    | C | -2.8232400 | 3.3147680  | 0.0036420  |
| 2    | C | -2.5841810 | 2.6571970  | -1.3677540 |
| 3    | N | -1.7277090 | 1.4874810  | -1.2918650 |
| 4    | C | -0.4224900 | 1.6721250  | -1.0023780 |
| 5    | N | 0.2949440  | 0.5174280  | -0.8249660 |
| 6    | C | 1.6472850  | 0.4128380  | -0.5252380 |
| 7    | C | 2.5319880  | 1.4891500  | -0.4444090 |
| 8    | C | 3.8621760  | 1.2688060  | -0.1519550 |
| 9    | C | 4.3365420  | -0.0087840 | 0.0643030  |
| 10   | C | 5.7500250  | -0.2257730 | 0.4268280  |
| 11   | F | 6.5616550  | 0.7308360  | -0.0851430 |
| 12   | F | 5.9755560  | -0.2155780 | 1.7685060  |
| 13   | F | 6.2096280  | -1.4246990 | -0.0074810 |
| 14   | C | 3.4672490  | -1.0839620 | -0.0133240 |
| 15   | C | 2.1406000  | -0.8801720 | -0.3025490 |
| 16   | O | 0.0690040  | 2.8037040  | -0.9178390 |
| 17   | O | -2.7999330 | 2.5411190  | 1.0243820  |
| 18   | O | -3.0710270 | 4.5257980  | 0.0119870  |
| 19   | H | -2.1680270 | 3.4012240  | -2.0267150 |
| 20   | H | -3.5417680 | 2.3411990  | -1.7652750 |
| 21   | H | -2.1716170 | 0.5857920  | -1.2433940 |
| 22   | H | -0.1871920 | -0.3807180 | -0.8854050 |
| 23   | H | 2.1631110  | 2.4724000  | -0.6103050 |
| 24   | H | 4.5339350  | 2.1018110  | -0.1024100 |
| 25   | H | 3.8310660  | -2.0789320 | 0.1454290  |
| 26   | H | 1.4562310  | -1.7008980 | -0.3601170 |
| 27   | H | -3.8134670 | 0.4086420  | 3.2340200  |
| 28   | H | -5.2805870 | 0.6517210  | 1.2481040  |
| 29   | C | -3.8025980 | -0.2864590 | 2.4093420  |
| 30   | H | -4.4584730 | -1.1158650 | 2.6172290  |
| 31   | N | -4.2929060 | 0.4462680  | 1.1851830  |
| 32   | H | -3.7246110 | 1.3611120  | 1.0931200  |
| 33   | C | -2.3837640 | -0.7939130 | 2.1781800  |
| 34   | H | -4.0834380 | -0.1209920 | 0.3298520  |
| 35   | H | -1.9392820 | -1.0672110 | 3.1196280  |
| 36   | H | -1.7886390 | -0.0199450 | 1.7129750  |
| 37   | O | -2.3969940 | -2.0115450 | 1.3822800  |
| 38   | O | -3.2683290 | -0.9652720 | -0.8023190 |
| 39   | P | -2.3046450 | -2.0699040 | -0.2517180 |
| 40   | O | -0.8376150 | -1.9827700 | -0.7550720 |
| 41   | O | -2.8969390 | -3.5654960 | -0.4829940 |
| 42   | H | -2.9713290 | -4.2413570 | -2.4551030 |
| 43   | C | -2.4347680 | -4.4538430 | -1.5424960 |
| 44   | H | -2.6464490 | -5.4570050 | -1.2145890 |
| 45   | H | -1.3759200 | -4.3218440 | -1.6992460 |



Table S24 - Cartesian coordinates (given in Angstroms) generated for structure **R** (Figure S221), calculated at HF/3-21G level, after energy minimisation calculations.

| Atom |   | X          | Y          | Z          |
|------|---|------------|------------|------------|
| 1    | C | -3.5656650 | 2.8786250  | -0.2767130 |
| 2    | C | -2.0971440 | 3.3372950  | -0.2472700 |
| 3    | N | -1.2337840 | 2.1797180  | -0.2237060 |
| 4    | C | 0.1034910  | 2.2679440  | -0.1604980 |
| 5    | N | 0.7051450  | 1.0327220  | -0.1341090 |
| 6    | C | 2.0536020  | 0.7481890  | -0.0736760 |
| 7    | C | 3.0686600  | 1.7068250  | -0.0296940 |
| 8    | C | 4.3880660  | 1.3115400  | 0.0286930  |
| 9    | C | 4.7266390  | -0.0273730 | 0.0445370  |
| 10   | C | 6.1393890  | -0.4347000 | 0.1610220  |
| 11   | F | 6.9794630  | 0.4666560  | -0.4032030 |
| 12   | F | 6.5633990  | -0.5711040 | 1.4467340  |
| 13   | F | 6.3742240  | -1.6335250 | -0.4262200 |
| 14   | C | 3.7289950  | -0.9864080 | -0.0028130 |
| 15   | C | 2.4110040  | -0.6064840 | -0.0611700 |
| 16   | O | 0.7120560  | 3.3441370  | -0.1289950 |
| 17   | O | -3.7453490 | 1.6160560  | -0.2395240 |
| 18   | O | -4.4326170 | 3.7558330  | -0.3326100 |
| 19   | H | -1.9546560 | 3.9630250  | 0.6266960  |
| 20   | H | -1.9211990 | 3.9572460  | -1.1190560 |
| 21   | H | -1.6935030 | 1.2884750  | -0.2482210 |
| 22   | H | 0.0677100  | 0.2349460  | -0.1581110 |
| 23   | H | 2.8024120  | 2.7368030  | -0.0452580 |
| 24   | H | 5.1589010  | 2.0552460  | 0.0531340  |
| 25   | H | 3.9851870  | -2.0263540 | -0.0032910 |
| 26   | H | 1.6338380  | -1.3425250 | -0.1016920 |
| 27   | H | -5.8960050 | -0.1343400 | 1.8011190  |
| 28   | H | -6.2419350 | -0.4292840 | -0.5680730 |
| 29   | C | -5.2760810 | -0.8294600 | 1.2567630  |
| 30   | H | -5.6740760 | -1.8269960 | 1.3474170  |
| 31   | N | -5.3004460 | -0.4274520 | -0.2010520 |
| 32   | H | -4.8486420 | 0.5306610  | -0.2901760 |
| 33   | C | -3.8489590 | -0.7735630 | 1.7990070  |
| 34   | H | -4.6800050 | -1.0767010 | -0.7562060 |
| 35   | H | -3.8715620 | -0.8860020 | 2.8697430  |
| 36   | H | -3.3961620 | 0.1668350  | 1.5308540  |
| 37   | O | -3.0569510 | -1.8847350 | 1.2986670  |
| 38   | O | -3.3905840 | -1.8971290 | -1.2695990 |
| 39   | P | -2.2998010 | -1.9130100 | -0.1560700 |
| 40   | O | -1.1974890 | -0.8263550 | -0.2046450 |
| 41   | O | -1.6476500 | -3.4039950 | -0.0521170 |
| 42   | H | -2.4874190 | -4.2097080 | -1.7848450 |
| 43   | C | -1.5992790 | -4.3191370 | -1.1830800 |
| 44   | H | -1.5398990 | -5.3135350 | -0.7742830 |
| 45   | H | -0.7237700 | -4.1160560 | -1.7825120 |

Table S25 - Cartesian coordinates (given in Angstroms) generated for structure **S** (Figure S221), calculated at HF/3-21G level, after energy minimisation calculations.

| Atom |   | X          | Y          | Z          |
|------|---|------------|------------|------------|
| 1    | C | -3.4902090 | -1.6466640 | -0.1270090 |
| 2    | C | -2.1620980 | -1.8456610 | -0.4818740 |
| 3    | C | -1.3274880 | -0.7372150 | -0.6973130 |
| 4    | C | -1.8542280 | 0.5589150  | -0.5488550 |
| 5    | C | -3.1807460 | 0.7429510  | -0.1961750 |
| 6    | C | -4.0064010 | -0.3610970 | 0.0152150  |
| 7    | C | -5.4228600 | -0.1705780 | 0.4499120  |
| 8    | N | 0.0088340  | -0.8253990 | -1.0697670 |
| 9    | C | 0.7922070  | -1.9580600 | -1.1428770 |
| 10   | O | 0.4148510  | -3.0901770 | -0.8593880 |
| 11   | N | 2.0570910  | -1.6808560 | -1.6074870 |
| 12   | C | 3.1297130  | -2.6128070 | -1.3303560 |
| 13   | C | 3.7411410  | -2.3384220 | 0.0408710  |
| 14   | O | 2.8405650  | -2.3933200 | 1.0073070  |
| 15   | O | 4.9092280  | -2.0461230 | 0.2075520  |
| 16   | F | -6.2266480 | -1.1471180 | -0.0062720 |
| 17   | F | -5.9315600 | 0.9980400  | 0.0233920  |
| 18   | F | -5.5536910 | -0.1731720 | 1.7918860  |
| 19   | H | -4.1336710 | -2.5067970 | 0.0318220  |
| 20   | H | -1.7651110 | -2.8437540 | -0.5959320 |
| 21   | H | -1.2060940 | 1.4177720  | -0.7130550 |
| 22   | H | -3.5777720 | 1.7474310  | -0.0891170 |
| 23   | H | 0.4926720  | 0.0606370  | -1.2727370 |
| 24   | H | 2.2975620  | -0.6927380 | -1.7028060 |
| 25   | H | 3.9113190  | -2.5233420 | -2.0857330 |
| 26   | H | 2.7141130  | -3.6228230 | -1.3515580 |
| 27   | H | 3.1839300  | -1.8844220 | 1.8403540  |
| 28   | N | 3.3357930  | -0.7384480 | 2.9746840  |
| 29   | H | 3.1053020  | -1.0948380 | 3.9001810  |
| 30   | H | 4.2676310  | -0.3317230 | 3.0480410  |
| 31   | C | 2.3587310  | 0.2863440  | 2.5728810  |
| 32   | C | 2.7491730  | 0.8602150  | 1.2223240  |
| 33   | O | 1.7292730  | 1.7607060  | 0.8137360  |
| 34   | P | 1.9146150  | 2.3727240  | -0.7005020 |
| 35   | O | 1.7876750  | 1.2377560  | -1.6916120 |
| 36   | O | 0.5114000  | 3.1887880  | -0.7795180 |
| 37   | C | 0.3623510  | 4.3208280  | 0.0738040  |
| 38   | O | 3.0953670  | 3.2843430  | -0.7459000 |
| 39   | H | 2.2698830  | 1.0978080  | 3.3047060  |
| 40   | H | 1.3807360  | -0.1955390 | 2.4781300  |
| 41   | H | 2.8395020  | 0.0518420  | 0.4874430  |
| 42   | H | 3.7134660  | 1.3825580  | 1.2852800  |
| 43   | H | -0.5803450 | 4.8016040  | -0.1905600 |
| 44   | H | 1.1884170  | 5.0221600  | -0.0727760 |
| 45   | H | 0.3317090  | 4.0082110  | 1.1220730  |

Table S26 - Cartesian coordinates (given in Angstroms) generated for structure **T** (Figure S222), calculated at HF/3-21G level, after energy minimisation calculations.

| Atom | X         | Y         | Z         |
|------|-----------|-----------|-----------|
| 1 O  | 3.503412  | 1.54027   | 0.220174  |
| 2 C  | 3.356874  | 2.782669  | 0.435073  |
| 3 C  | 1.903637  | 3.270422  | 0.599069  |
| 4 N  | 1.008092  | 2.137568  | 0.626084  |
| 5 C  | -0.318027 | 2.252941  | 0.447499  |
| 6 N  | -0.943884 | 1.029228  | 0.431547  |
| 7 C  | -2.278951 | 0.758525  | 0.215046  |
| 8 C  | -3.272567 | 1.734656  | 0.102329  |
| 9 C  | -4.584900 | 1.366361  | -0.102334 |
| 10 C | -4.937433 | 0.034913  | -0.199647 |
| 11 C | -6.335661 | -0.344866 | -0.472605 |
| 12 F | -7.217646 | 0.553363  | 0.030172  |
| 13 F | -6.628051 | -0.436188 | -1.798841 |
| 14 F | -6.647654 | -1.556497 | 0.049243  |
| 15 C | -3.960012 | -0.940625 | -0.093194 |
| 16 C | -2.646840 | -0.591832 | 0.109489  |
| 17 O | -0.894805 | 3.339071  | 0.304996  |
| 18 O | 4.243640  | 3.643184  | 0.519133  |
| 19 H | 1.669258  | 3.932701  | -0.226599 |
| 20 H | 1.852534  | 3.860871  | 1.507514  |
| 21 H | 1.432875  | 1.227671  | 0.696683  |
| 22 H | -0.315180 | 0.232725  | 0.594887  |
| 23 H | -2.993404 | 2.758914  | 0.175448  |
| 24 H | -5.338927 | 2.124000  | -0.176597 |
| 25 H | -4.229670 | -1.975016 | -0.165010 |
| 26 H | -1.892612 | -1.353075 | 0.172386  |
| 27 C | 4.972525  | -0.154549 | -2.242594 |
| 28 C | 4.318205  | -1.119812 | -1.254032 |
| 29 C | 2.808464  | -1.139120 | -1.411225 |
| 30 O | 2.271272  | -2.281358 | -0.695029 |
| 31 P | 1.153847  | -2.203111 | 0.505285  |
| 32 O | -0.124244 | -2.985101 | 0.122247  |
| 33 O | 1.927265  | -3.000347 | 1.707913  |
| 34 C | 3.047918  | -2.399548 | 2.418915  |
| 35 O | 0.996086  | -0.709797 | 0.917609  |
| 36 O | 4.730532  | -0.710298 | 0.069530  |
| 37 H | 4.706132  | -2.114667 | -1.409024 |
| 38 H | 2.544275  | -1.258247 | -2.452186 |
| 39 H | 2.396751  | -0.225767 | -1.019303 |
| 40 H | 2.684061  | -1.662029 | 3.119686  |
| 41 H | 3.729993  | -1.935736 | 1.722884  |
| 42 H | 3.536182  | -3.200416 | 2.950131  |
| 43 H | 4.515371  | 0.820520  | -2.131328 |
| 44 H | 4.866103  | -0.495579 | -3.260674 |
| 45 O | 6.384534  | -0.088435 | -1.940829 |
| 46 H | 6.445850  | -0.130058 | -0.972938 |
| 47 H | 4.332482  | 0.187867  | 0.249493  |

Table S27 - Cartesian coordinates (given in Angstroms) generated for structure **U** (Figure S222), calculated at HF/3-21G level, after energy minimisation calculations.

| Atom | X          | Y          | Z          |
|------|------------|------------|------------|
| 1 O  | 4.1690690  | -2.2013370 | -0.3672220 |
| 2 C  | 2.9446980  | -2.4784420 | -0.3111400 |
| 3 C  | 2.1952380  | -2.7737820 | -1.6177380 |
| 4 N  | 1.1639910  | -1.7508770 | -1.7551740 |
| 5 C  | -0.0919940 | -1.9686140 | -1.2906830 |
| 6 N  | -0.7292280 | -0.7835470 | -1.0153790 |
| 7 C  | -2.0365630 | -0.5813140 | -0.6215190 |
| 8 C  | -2.9978620 | -1.5909280 | -0.5451840 |
| 9 C  | -4.2870080 | -1.2896490 | -0.1609320 |
| 10 C | -4.6438140 | 0.0061290  | 0.1551930  |
| 11 C | -6.0120940 | 0.3077560  | 0.6156610  |
| 12 F | -6.9279570 | -0.5399400 | 0.0869250  |
| 13 F | -6.1670770 | 0.2147210  | 1.9643760  |
| 14 F | -6.3923680 | 1.5686650  | 0.2948340  |
| 15 C | -3.6960360 | 1.0137170  | 0.0877370  |
| 16 C | -2.4068760 | 0.7312880  | -0.2939420 |
| 17 O | -0.5971650 | -3.0854120 | -1.1553340 |
| 18 O | 2.2285700  | -2.4548320 | 0.7279720  |
| 19 H | 1.7153160  | -3.7380900 | -1.5675000 |
| 20 H | 2.8822990  | -2.7357540 | -2.4470410 |
| 21 H | 1.4747290  | -0.7880870 | -1.7441050 |
| 22 H | -0.1162100 | 0.0337780  | -1.0631700 |
| 23 H | -2.7140380 | -2.5890880 | -0.7819640 |
| 24 H | -5.0196110 | -2.0700700 | -0.1162030 |
| 25 H | -3.9706460 | 2.0209600  | 0.3278280  |
| 26 H | -1.6723690 | 1.5135410  | -0.3327950 |
| 27 C | 4.2607010  | -0.5552520 | 2.7181040  |
| 28 C | 4.0039260  | 0.5837990  | 1.7020370  |
| 29 C | 2.5077500  | 0.8329130  | 1.5709290  |
| 30 O | 2.3056690  | 2.0931450  | 0.8763480  |
| 31 P | 1.4672980  | 2.3124230  | -0.5116840 |
| 32 O | 0.1761980  | 3.1273850  | -0.2650860 |
| 33 O | 2.5316110  | 3.2216590  | -1.3597250 |
| 34 C | 3.7742900  | 2.6472950  | -1.8608710 |
| 35 O | 1.3149050  | 0.9357420  | -1.2262840 |
| 36 O | 4.6157560  | 0.3337610  | 0.4221350  |
| 37 H | 4.4598190  | 1.4918510  | 2.0673070  |
| 38 H | 2.0587210  | 0.9235830  | 2.5456670  |
| 39 H | 2.0418360  | 0.0283200  | 1.0288950  |
| 40 H | 3.5867660  | 2.1349520  | -2.7935940 |
| 41 H | 4.1897340  | 1.9571750  | -1.1417340 |
| 42 H | 4.4483370  | 3.4721390  | -2.0271300 |
| 43 H | 4.5065760  | -0.1185900 | 3.6758030  |
| 44 H | 5.1237520  | -1.1152780 | 2.3733960  |
| 45 O | 3.1237050  | -1.3964400 | 2.9491890  |
| 46 H | 2.8312890  | -1.8582430 | 2.1183230  |
| 47 H | 4.4748290  | -0.5983300 | 0.1300750  |

Table S28 - Cartesian coordinates (given in Angstroms) generated for structure **V** (Figure S222), calculated at HF/3-21G level, after energy minimisation calculations.

| Atom | X          | Y          | Z          |
|------|------------|------------|------------|
| 1 C  | 2.8151010  | -2.7488900 | -0.2942630 |
| 2 C  | 2.1740970  | -2.7635610 | -1.6976220 |
| 3 N  | 1.1620100  | -1.7250210 | -1.7905260 |
| 4 C  | -0.0890630 | -1.9500190 | -1.3239310 |
| 5 N  | -0.7382450 | -0.7748090 | -1.0296570 |
| 6 C  | -2.0355460 | -0.6065230 | -0.5833490 |
| 7 C  | -2.9926200 | -1.6229390 | -0.5568830 |
| 8 C  | -4.2732730 | -1.3554790 | -0.1223160 |
| 9 C  | -4.6260410 | -0.0871130 | 0.2936520  |
| 10 C | -5.9843940 | 0.1757570  | 0.8045690  |
| 11 F | -6.9100810 | -0.6355510 | 0.2373240  |
| 12 F | -6.1087750 | -0.0134680 | 2.1463840  |
| 13 F | -6.3745320 | 1.4548700  | 0.5828880  |
| 14 C | -3.6812690 | 0.9251130  | 0.2810430  |
| 15 C | -2.3998570 | 0.6752980  | -0.1476010 |
| 16 O | -0.5913910 | -3.0706700 | -1.2090310 |
| 17 O | 2.0685970  | -2.4745920 | 0.6694890  |
| 18 O | 4.0562960  | -2.9942710 | -0.2421680 |
| 19 H | 1.7069980  | -3.7228840 | -1.8721960 |
| 20 H | 2.9452800  | -2.6036660 | -2.4342140 |
| 21 H | 1.4746130  | -0.7656060 | -1.7792450 |
| 22 H | -0.1569430 | 0.0592150  | -1.1192960 |
| 23 H | -2.7120260 | -2.6008340 | -0.8689980 |
| 24 H | -5.0027880 | -2.1401070 | -0.1178230 |
| 25 H | -3.9507610 | 1.9102140  | 0.6046070  |
| 26 H | -1.6625820 | 1.4553160  | -0.1278800 |
| 27 C | 4.3249510  | -0.9038010 | 2.3968570  |
| 28 C | 3.6310330  | 0.4387630  | 2.1966740  |
| 29 C | 3.0267240  | 0.5336510  | 0.8149310  |
| 30 O | 2.4970120  | 1.8918150  | 0.7052340  |
| 31 P | 1.4251810  | 2.3050840  | -0.4657560 |
| 32 O | 0.1587780  | 2.9419200  | 0.1557850  |
| 33 O | 2.3143540  | 3.4155540  | -1.2834960 |
| 34 C | 2.1665030  | 3.6045650  | -2.7165660 |
| 35 O | 1.2244750  | 1.0688560  | -1.3966160 |
| 36 O | 4.5940330  | 1.5028980  | 2.3601590  |
| 37 H | 2.8431830  | 0.5365460  | 2.9357610  |
| 38 H | 2.2585000  | -0.2016130 | 0.6734990  |
| 39 H | 3.8079740  | 0.3960400  | 0.0862490  |
| 40 H | 1.2848560  | 4.1937820  | -2.9275420 |
| 41 H | 2.0887220  | 2.6481880  | -3.2091240 |
| 42 H | 3.0432050  | 4.1314320  | -3.0542790 |
| 43 H | 3.5577660  | -1.6608210 | 2.4648500  |
| 44 H | 4.8769970  | -0.8637910 | 3.3275150  |
| 45 O | 5.2296410  | -1.2034320 | 1.3214360  |
| 46 H | 4.8458180  | -1.9160260 | 0.7474020  |
| 47 H | 4.1951850  | 2.3009540  | 1.9814590  |

Table S29 - Cartesian coordinates (given in Angstroms) generated for structure **W** (Figure S222), calculated at HF/3-21G level, after energy minimisation calculations.

| Atom |   | X          | Y          | Z          |
|------|---|------------|------------|------------|
| 1    | O | -4.1605700 | 3.9622320  | -0.1373850 |
| 2    | C | -3.3481750 | 3.0292620  | -0.1902810 |
| 3    | C | -1.8799370 | 3.4112740  | -0.4390000 |
| 4    | N | -1.0426520 | 2.2335600  | -0.4616700 |
| 5    | C | 0.2954480  | 2.3105390  | -0.3572120 |
| 6    | N | 0.8914240  | 1.0747270  | -0.3102570 |
| 7    | C | 2.2344040  | 0.7907550  | -0.1483140 |
| 8    | C | 3.2516610  | 1.7476480  | -0.1927650 |
| 9    | C | 4.5679130  | 1.3672190  | -0.0407320 |
| 10   | C | 4.9007290  | 0.0423390  | 0.1583680  |
| 11   | C | 6.3067020  | -0.3465680 | 0.3732040  |
| 12   | F | 7.1704780  | 0.4876150  | -0.2553830 |
| 13   | F | 6.6813270  | -0.3383720 | 1.6816820  |
| 14   | F | 6.5625260  | -1.6031630 | -0.0664960 |
| 15   | C | 3.8998290  | -0.9132410 | 0.2111400  |
| 16   | C | 2.5824540  | -0.5516600 | 0.0634000  |
| 17   | O | 0.9050200  | 3.3865230  | -0.2988530 |
| 18   | O | -3.5969480 | 1.7876620  | -0.0692970 |
| 19   | H | -1.5709030 | 4.0912770  | 0.3450730  |
| 20   | H | -1.8367970 | 3.9626730  | -1.3730050 |
| 21   | H | -1.5041810 | 1.3414700  | -0.4830170 |
| 22   | H | 0.2424680  | 0.2830630  | -0.4040340 |
| 23   | H | 2.9891590  | 2.7680080  | -0.3406790 |
| 24   | H | 5.3393600  | 2.1091870  | -0.0884650 |
| 25   | H | 4.1535900  | -1.9427290 | 0.3655470  |
| 26   | H | 1.8109350  | -1.2947130 | 0.1322710  |
| 27   | C | -5.6258950 | -0.2946090 | 1.5382790  |
| 28   | C | -4.7314660 | -1.5083620 | 1.2033480  |
| 29   | C | -3.2670000 | -1.1188840 | 1.2933670  |
| 30   | O | -2.4450000 | -2.2591490 | 0.9225590  |
| 31   | P | -1.1887470 | -2.1553720 | -0.1217730 |
| 32   | O | 0.0781980  | -2.7835970 | 0.5098610  |
| 33   | O | -1.7322310 | -3.0808440 | -1.3652270 |
| 34   | C | -1.4985690 | -2.7166230 | -2.7507980 |
| 35   | O | -1.0832420 | -0.6864370 | -0.6357320 |
| 36   | O | -5.0693380 | -1.9241470 | -0.1337570 |
| 37   | H | -4.9297720 | -2.3291340 | 1.8759460  |
| 38   | H | -3.0255230 | -0.8546650 | 2.3142290  |
| 39   | H | -3.0588310 | -0.2841100 | 0.6491230  |
| 40   | H | -0.4987840 | -3.0016170 | -3.0487290 |
| 41   | H | -1.6233760 | -1.6539860 | -2.8819550 |
| 42   | H | -2.2184750 | -3.2570000 | -3.3428190 |
| 43   | H | -5.2150050 | 0.2750550  | 2.3635780  |
| 44   | H | -6.6115980 | -0.6383000 | 1.8164100  |
| 45   | O | -5.7746010 | 0.5013340  | 0.3489680  |
| 46   | H | -4.9647360 | 1.0763680  | 0.1864560  |
| 47   | H | -5.4155980 | -1.1161510 | -0.5551840 |

Table S30 - Cartesian coordinates (given in Angstroms) generated for structure **X** (Figure S222), calculated at HF/3-21G level, after energy minimisation calculations.

| Atom | X          | Y          | Z          |
|------|------------|------------|------------|
| 1 O  | -4.2888410 | 3.9190560  | 0.0165920  |
| 2 C  | -3.4495810 | 3.0204800  | -0.1367220 |
| 3 C  | -1.9815420 | 3.4705040  | -0.2472910 |
| 4 N  | -1.1132470 | 2.3227680  | -0.3819390 |
| 5 C  | 0.2197370  | 2.4124450  | -0.2345190 |
| 6 N  | 0.8399400  | 1.1904870  | -0.3097980 |
| 7 C  | 2.1839560  | 0.9122540  | -0.1686800 |
| 8 C  | 3.1878640  | 1.8779000  | -0.0633450 |
| 9 C  | 4.5065290  | 1.4935610  | 0.0546190  |
| 10 C | 4.8548080  | 0.1574490  | 0.0718970  |
| 11 C | 6.2632890  | -0.2412780 | 0.2504630  |
| 12 F | 7.1229650  | 0.6827060  | -0.2432910 |
| 13 F | 6.6213390  | -0.4120820 | 1.5522430  |
| 14 F | 6.5407900  | -1.4208790 | -0.3572190 |
| 15 C | 3.8671560  | -0.8085750 | -0.0251300 |
| 16 C | 2.5490850  | -0.4415060 | -0.1413890 |
| 17 O | 0.8065670  | 3.4848420  | -0.0417420 |
| 18 O | -3.6659140 | 1.7709320  | -0.2224230 |
| 19 H | -1.7368760 | 4.0429140  | 0.6389170  |
| 20 H | -1.9031860 | 4.1440960  | -1.0946010 |
| 21 H | -1.5599570 | 1.4347220  | -0.5214850 |
| 22 H | 0.2159670  | 0.3941110  | -0.4853650 |
| 23 H | 2.9130540  | 2.9057850  | -0.0736730 |
| 24 H | 5.2690040  | 2.2430630  | 0.1233240  |
| 25 H | 4.1316410  | -1.8466030 | -0.0137550 |
| 26 H | 1.7818260  | -1.1878010 | -0.1931310 |
| 27 C | -5.8868130 | -0.7016900 | 0.9818140  |
| 28 C | -4.6688710 | -1.5854300 | 0.6881430  |
| 29 C | -3.3917120 | -0.9695060 | 1.2606600  |
| 30 O | -2.2602660 | -1.8846680 | 1.0902140  |
| 31 P | -1.4568840 | -2.0332540 | -0.3274900 |
| 32 O | -1.0130300 | -0.6301580 | -0.8259940 |
| 33 O | -0.1450920 | -2.8676380 | 0.1881130  |
| 34 C | 0.3012020  | -4.1095210 | -0.4261250 |
| 35 O | -2.2899100 | -2.9241050 | -1.2953590 |
| 36 O | -4.6027240 | -1.7490060 | -0.7351170 |
| 37 H | -4.8229860 | -2.5372210 | 1.1884260  |
| 38 H | -3.4914350 | -0.8340330 | 2.3257610  |
| 39 H | -3.1791310 | -0.0312440 | 0.7783490  |
| 40 H | 0.6674200  | -4.7432970 | 0.3646010  |
| 41 H | 1.0976090  | -3.8963580 | -1.1231730 |
| 42 H | -0.5193880 | -4.5822440 | -0.9407630 |
| 43 H | -5.9126650 | -0.5058880 | 2.0518590  |
| 44 H | -6.7707860 | -1.2758150 | 0.7377170  |
| 45 O | -5.9605860 | 0.5053560  | 0.2223880  |
| 46 H | -5.0903760 | 0.9543720  | 0.0754930  |
| 47 H | -3.8614190 | -2.3396380 | -1.0093110 |

Table S31 - Cartesian coordinates (given in Angstroms) generated for structure **Y** (Figure S222), calculated at HF/3-21G level, after energy minimisation calculations.

| Atom | X          | Y          | Z          |
|------|------------|------------|------------|
| 1 O  | 3.6311130  | 1.6467910  | -0.2269950 |
| 2 C  | 3.4248370  | 2.8820230  | 0.0411730  |
| 3 C  | 1.9903530  | 3.2726490  | 0.4294160  |
| 4 N  | 1.1122100  | 2.1313720  | 0.3347880  |
| 5 C  | -0.2265690 | 2.2523780  | 0.3170040  |
| 6 N  | -0.8481520 | 1.0367020  | 0.1650930  |
| 7 C  | -2.1963250 | 0.7705530  | 0.0633060  |
| 8 C  | -3.2002760 | 1.7374700  | 0.1606360  |
| 9 C  | -4.5251170 | 1.3733690  | 0.0506070  |
| 10 C | -4.8798910 | 0.0551780  | -0.1560820 |
| 11 C | -6.2965190 | -0.3159290 | -0.3257440 |
| 12 F | -7.1288850 | 0.5250230  | 0.3353880  |
| 13 F | -6.7150220 | -0.2970450 | -1.6208450 |
| 14 F | -6.5526350 | -1.5718550 | 0.1162010  |
| 15 C | -3.8925620 | -0.9117160 | -0.2534870 |
| 16 C | -2.5672070 | -0.5672940 | -0.1475500 |
| 17 O | -0.8149810 | 3.3367730  | 0.4191330  |
| 18 O | 4.2611970  | 3.7889570  | 0.0159930  |
| 19 H | 1.6711530  | 4.0673510  | -0.2333080 |
| 20 H | 2.0191720  | 3.6880330  | 1.4324390  |
| 21 H | 1.5361080  | 1.2245010  | 0.2168230  |
| 22 H | -0.1971820 | 0.2415670  | 0.1243530  |
| 23 H | -2.9191660 | 2.7512130  | 0.3216000  |
| 24 H | -5.2860860 | 2.1226590  | 0.1363930  |
| 25 H | -4.1643270 | -1.9369310 | -0.4054180 |
| 26 H | -1.8077650 | -1.3219270 | -0.2304140 |
| 27 C | 5.7678370  | -0.7060090 | -1.0095490 |
| 28 C | 4.6524350  | -1.4724940 | -0.2950220 |
| 29 C | 3.5155760  | -1.7619060 | -1.2638950 |
| 30 O | 2.5683050  | -2.6842870 | -0.6636850 |
| 31 P | 1.2071170  | -2.2126900 | 0.1194980  |
| 32 O | -0.0229510 | -2.9446910 | -0.4719450 |
| 33 O | 1.4607900  | -2.7478940 | 1.6465510  |
| 34 C | 1.8217580  | -1.8484900 | 2.7327680  |
| 35 O | 1.1634180  | -0.6567710 | 0.1334030  |
| 36 O | 4.1742640  | -0.7505960 | 0.8571680  |
| 37 H | 5.0462620  | -2.4078200 | 0.0743740  |
| 38 H | 3.8898430  | -2.2452410 | -2.1522310 |
| 39 H | 3.0234380  | -0.8415080 | -1.5218070 |
| 40 H | 1.0487010  | -1.1091340 | 2.8834390  |
| 41 H | 2.7534130  | -1.3645550 | 2.4997500  |
| 42 H | 1.9150980  | -2.4638860 | 3.6126980  |
| 43 H | 6.3017690  | -1.3801930 | -1.6649130 |
| 44 H | 6.4595690  | -0.3421050 | -0.2563680 |
| 45 O | 5.2609150  | 0.3585050  | -1.8303140 |
| 46 H | 4.7090500  | 0.9677800  | -1.2784710 |
| 47 H | 3.8281160  | 0.1259520  | 0.5767810  |



Table S32 - Cartesian coordinates (given in Angstroms) generated for structure **Z** (Figure S222), calculated at HF/3-21G level, after energy minimisation calculations.

| Atom | X          | Y          | Z          |
|------|------------|------------|------------|
| 1 O  | -3.1010370 | 1.8009090  | -0.1431400 |
| 2 C  | -3.1799140 | 2.4432990  | -1.2346200 |
| 3 C  | -1.9857070 | 2.3449870  | -2.2031360 |
| 4 N  | -1.0542220 | 1.2930220  | -1.8551080 |
| 5 C  | 0.1813650  | 1.5763870  | -1.4068730 |
| 6 N  | 0.8419870  | 0.4955110  | -0.8716980 |
| 7 C  | 2.1702960  | 0.4401290  | -0.4808660 |
| 8 C  | 3.0923210  | 1.4786910  | -0.6275520 |
| 9 C  | 4.4006750  | 1.3028410  | -0.2277230 |
| 10 C | 4.8179900  | 0.1085860  | 0.3241320  |
| 11 C | 6.2064040  | -0.0479650 | 0.7956520  |
| 12 F | 7.0736670  | 0.7263960  | 0.0992470  |
| 13 F | 6.3813620  | 0.2937550  | 2.1012930  |
| 14 F | 6.6374110  | -1.3296680 | 0.6981810  |
| 15 C | 3.9112100  | -0.9272090 | 0.4781460  |
| 16 C | 2.6063510  | -0.7682750 | 0.0828720  |
| 17 O | 0.6799920  | 2.7093150  | -1.4717730 |
| 18 O | -4.1165790 | 3.1684200  | -1.6087610 |
| 19 H | -1.4588130 | 3.2879200  | -2.1984590 |
| 20 H | -2.3891950 | 2.1961720  | -3.1969360 |
| 21 H | -1.4267480 | 0.3510480  | -1.8537060 |
| 22 H | 0.3107610  | -0.3540280 | -0.6593290 |
| 23 H | 2.7659280  | 2.4012500  | -1.0436850 |
| 24 H | 5.1010810  | 2.1033950  | -0.3556610 |
| 25 H | 4.2307830  | -1.8596670 | 0.8978570  |
| 26 H | 1.8928350  | -1.5581320 | 0.1954850  |
| 27 C | -3.6415000 | 0.6676570  | 3.3947240  |
| 28 C | -3.8854020 | -0.2688510 | 2.2055410  |
| 29 C | -2.5751500 | -0.7049710 | 1.5809150  |
| 30 O | -2.8763150 | -1.7523090 | 0.6133750  |
| 31 P | -1.8392520 | -2.0673140 | -0.6147930 |
| 32 O | -0.3891630 | -1.8269770 | -0.1005070 |
| 33 O | -2.1581500 | -3.6613720 | -0.7938050 |
| 34 C | -2.0738220 | -4.3353160 | -2.0781680 |
| 35 O | -2.2298990 | -1.3084560 | -1.9133580 |
| 36 O | -4.7348490 | 0.4363060  | 1.2838560  |
| 37 H | -4.4277620 | -1.1405380 | 2.5415660  |
| 38 H | -1.9075680 | -1.1025790 | 2.3308440  |
| 39 H | -2.1218840 | 0.1371300  | 1.0850800  |
| 40 H | -1.0546430 | -4.6398240 | -2.2700090 |
| 41 H | -2.4101030 | -3.6771520 | -2.8641990 |
| 42 H | -2.7085530 | -5.2037280 | -2.0185790 |
| 43 H | -2.9377750 | 1.4427930  | 3.1070560  |
| 44 H | -3.2487840 | 0.1327170  | 4.2459470  |
| 45 O | -4.9086650 | 1.2491740  | 3.7647710  |
| 46 H | -5.3833010 | 1.3501150  | 2.9212580  |
| 47 H | -4.1771770 | 1.0287150  | 0.6929880  |

Table S33 - Cartesian coordinates (given in Angstroms) generated for structure **AA** (Figure S222), calculated at HF/3-21G level, after energy minimisation calculations.

| Atom | X          | Y          | Z          |
|------|------------|------------|------------|
| 1 O  | 4.1515740  | -2.0095050 | -1.0632230 |
| 2 C  | 2.9056620  | -2.1223210 | -1.0039540 |
| 3 C  | 2.0842940  | -1.9240010 | -2.2858920 |
| 4 N  | 1.0570640  | -0.9274450 | -2.0190480 |
| 5 C  | -0.1610710 | -1.3099050 | -1.5830530 |
| 6 N  | -0.8323580 | -0.3175810 | -0.9084190 |
| 7 C  | -2.1656160 | -0.3151530 | -0.5352670 |
| 8 C  | -3.0883010 | -1.3101760 | -0.8637500 |
| 9 C  | -4.4037540 | -1.1900130 | -0.4669310 |
| 10 C | -4.8261820 | -0.0956330 | 0.2607420  |
| 11 C | -6.2229820 | -0.0059150 | 0.7252060  |
| 12 F | -7.0798810 | -0.6514560 | -0.1028290 |
| 13 F | -6.4252150 | -0.5516200 | 1.9553520  |
| 14 F | -6.6457040 | 1.2781510  | 0.8270280  |
| 15 C | -3.9180790 | 0.8950710  | 0.5965440  |
| 16 C | -2.6063850 | 0.7908500  | 0.2056380  |
| 17 O | -0.6323950 | -2.4338200 | -1.7877240 |
| 18 O | 2.2332900  | -2.3375940 | 0.0506210  |
| 19 H | 1.6060030  | -2.8507170 | -2.5636900 |
| 20 H | 2.7365910  | -1.5910230 | -3.0765940 |
| 21 H | 1.3918100  | 0.0263950  | -1.9156430 |
| 22 H | -0.2902740 | 0.4690880  | -0.5377850 |
| 23 H | -2.7568010 | -2.1593890 | -1.4119430 |
| 24 H | -5.1053470 | -1.9542410 | -0.7342920 |
| 25 H | -4.2418070 | 1.7504180  | 1.1544820  |
| 26 H | -1.8911900 | 1.5465410  | 0.4573590  |
| 27 C | 4.1647460  | -1.4136280 | 2.8519310  |
| 28 C | 4.2521160  | -0.1390340 | 1.9971770  |
| 29 C | 2.8602720  | 0.3498720  | 1.6071590  |
| 30 O | 3.0077410  | 1.6161140  | 0.9015160  |
| 31 P | 1.9104960  | 2.1074450  | -0.2081230 |
| 32 O | 0.4805450  | 1.7644630  | 0.3053800  |
| 33 O | 2.2056670  | 3.7140710  | -0.1361960 |
| 34 C | 2.1008550  | 4.5781120  | -1.2995470 |
| 35 O | 2.2558310  | 1.5801820  | -1.6299490 |
| 36 O | 5.1135820  | -0.3352160 | 0.8717830  |
| 37 H | 4.7067400  | 0.6360760  | 2.5985300  |
| 38 H | 2.2728050  | 0.5195310  | 2.4976520  |
| 39 H | 2.3652540  | -0.3794290 | 0.9885710  |
| 40 H | 1.0786640  | 4.9062000  | -1.4251060 |
| 41 H | 2.4235610  | 4.0497590  | -2.1829880 |
| 42 H | 2.7363200  | 5.4286310  | -1.1167960 |
| 43 H | 3.4340650  | -1.2589970 | 3.6419830  |
| 44 H | 5.1261880  | -1.5638270 | 3.3246480  |
| 45 O | 3.8948000  | -2.6021230 | 2.1008960  |
| 46 H | 3.2143010  | -2.4889460 | 1.3891610  |
| 47 H | 4.7814130  | -1.0395530 | 0.2697670  |

Table S34 - Cartesian coordinates (given in Angstroms) generated for structure **AB** (Figure S222), calculated at HF/3-21G level, after energy minimisation calculations.

| Atom | X          | Y          | Z          |
|------|------------|------------|------------|
| 1 O  | -3.4990670 | 3.8379020  | -1.0559680 |
| 2 C  | -2.6861090 | 2.9107330  | -0.9045180 |
| 3 C  | -2.1116540 | 2.3038230  | -2.2002590 |
| 4 N  | -1.2144700 | 1.1922590  | -1.9692750 |
| 5 C  | 0.0356430  | 1.4427770  | -1.5366950 |
| 6 N  | 0.7036160  | 0.3414900  | -1.0555010 |
| 7 C  | 2.0265710  | 0.2840260  | -0.6430170 |
| 8 C  | 2.9401470  | 1.3362290  | -0.7349820 |
| 9 C  | 4.2413850  | 1.1606590  | -0.3121680 |
| 10 C | 4.6601400  | -0.0472020 | 0.2078220  |
| 11 C | 6.0392800  | -0.2045930 | 0.7057410  |
| 12 F | 6.9141650  | 0.5979690  | 0.0521190  |
| 13 F | 6.1814020  | 0.1004560  | 2.0243720  |
| 14 F | 6.4850220  | -1.4787920 | 0.5807250  |
| 15 C | 3.7620850  | -1.0970800 | 0.3061010  |
| 16 C | 2.4640630  | -0.9382690 | -0.1114920 |
| 17 O | 0.5452800  | 2.5690760  | -1.5941820 |
| 18 O | -2.2834410 | 2.4184320  | 0.1960180  |
| 19 H | -1.6076110 | 3.0912870  | -2.7411080 |
| 20 H | -2.9448250 | 1.9649190  | -2.8016200 |
| 21 H | -1.6457600 | 0.2791540  | -1.8889950 |
| 22 H | 0.1926300  | -0.5315800 | -0.9155700 |
| 23 H | 2.6128430  | 2.2680120  | -1.1286670 |
| 24 H | 4.9352380  | 1.9725210  | -0.3977160 |
| 25 H | 4.0826450  | -2.0397260 | 0.7015630  |
| 26 H | 1.7568800  | -1.7382320 | -0.0380250 |
| 27 C | -3.3002600 | 1.1546230  | 3.2430200  |
| 28 C | -3.3127850 | -0.2692180 | 2.6847140  |
| 29 C | -2.3527470 | -0.4287800 | 1.5161430  |
| 30 O | -2.6820630 | -1.7203580 | 0.9073450  |
| 31 P | -2.0233990 | -2.1185610 | -0.5446780 |
| 32 O | -0.4724310 | -2.0778710 | -0.4278010 |
| 33 O | -2.5815670 | -3.6504720 | -0.6370950 |
| 34 C | -2.9661730 | -4.2600230 | -1.9002130 |
| 35 O | -2.6399740 | -1.2555960 | -1.6803150 |
| 36 O | -4.6474280 | -0.5789710 | 2.2448530  |
| 37 H | -3.0114560 | -0.9481660 | 3.4751060  |
| 38 H | -1.3275190 | -0.4417490 | 1.8550350  |
| 39 H | -2.4870690 | 0.3563440  | 0.7917860  |
| 40 H | -2.0991960 | -4.6913480 | -2.3798280 |
| 41 H | -3.4096190 | -3.5197560 | -2.5474910 |
| 42 H | -3.6786620 | -5.0342640 | -1.6698810 |
| 43 H | -2.2935320 | 1.3669670  | 3.5966020  |
| 44 H | -3.9574220 | 1.1758920  | 4.1019220  |
| 45 O | -3.7770260 | 2.1450070  | 2.3349030  |
| 46 H | -3.1807280 | 2.2852570  | 1.5511550  |
| 47 H | -4.5709640 | -1.3334890 | 1.6411410  |

Table S35 - Cartesian coordinates (given in Angstroms) generated for structure **AC** (Figure S222), calculated at HF/3-21G level, after energy minimisation calculations.

| Atom | X          | Y          | Z          |
|------|------------|------------|------------|
| 1 O  | -3.6148440 | 3.9172690  | -0.6162300 |
| 2 C  | -3.0482650 | 2.8188920  | -0.6046460 |
| 3 C  | -1.9966940 | 2.5684880  | -1.6959690 |
| 4 N  | -1.0976450 | 1.4746910  | -1.3872290 |
| 5 C  | 0.1753480  | 1.7155240  | -1.0249310 |
| 6 N  | 0.8422350  | 0.6061920  | -0.5603930 |
| 7 C  | 2.1960600  | 0.5051270  | -0.2813120 |
| 8 C  | 3.1294570  | 1.5285550  | -0.4608330 |
| 9 C  | 4.4603530  | 1.3088180  | -0.1732560 |
| 10 C | 4.8903460  | 0.0845150  | 0.2969880  |
| 11 C | 6.3071930  | -0.1197530 | 0.6506010  |
| 12 F | 7.1367470  | 0.6525390  | -0.0927350 |
| 13 F | 6.5955980  | 0.1807250  | 1.9462710  |
| 14 F | 6.6943570  | -1.4083110 | 0.4846510  |
| 15 C | 3.9734250  | -0.9373530 | 0.4808000  |
| 16 C | 2.6458220  | -0.7348290 | 0.1966620  |
| 17 O | 0.7009550  | 2.8354920  | -1.1052780 |
| 18 O | -3.2866270 | 1.8517170  | 0.2010890  |
| 19 H | -1.4283970 | 3.4719620  | -1.8350720 |
| 20 H | -2.5286060 | 2.3605340  | -2.6194130 |
| 21 H | -1.4870960 | 0.5363080  | -1.4010520 |
| 22 H | 0.3040420  | -0.2329780 | -0.3237540 |
| 23 H | 2.7940600  | 2.4733060  | -0.8150770 |
| 24 H | 5.1676890  | 2.0992000  | -0.3247750 |
| 25 H | 4.3024300  | -1.8931030 | 0.8357570  |
| 26 H | 1.9242930  | -1.5137580 | 0.3310400  |
| 27 C | -5.1234130 | 0.2967170  | 2.4311550  |
| 28 C | -4.6813870 | -0.7497790 | 1.4031200  |
| 29 C | -3.2324940 | -1.1403030 | 1.6524700  |
| 30 O | -2.8745290 | -2.2213270 | 0.7460290  |
| 31 P | -1.7363320 | -2.0650880 | -0.4170220 |
| 32 O | -0.3705460 | -1.7124930 | 0.2459740  |
| 33 O | -1.7596680 | -3.6137470 | -0.9463210 |
| 34 C | -1.5391210 | -3.9532510 | -2.3409370 |
| 35 O | -2.1707240 | -1.1221300 | -1.5725740 |
| 36 O | -4.8575680 | -0.2745610 | 0.0601700  |
| 37 H | -5.3045120 | -1.6266660 | 1.5060080  |
| 38 H | -3.0989960 | -1.5046310 | 2.6590780  |
| 39 H | -2.6011940 | -0.2810710 | 1.4942270  |
| 40 H | -0.4793970 | -4.0265770 | -2.5419090 |
| 41 H | -1.9767990 | -3.2014050 | -2.9783050 |
| 42 H | -2.0071150 | -4.9089220 | -2.5096110 |
| 43 H | -5.2597180 | -0.1790080 | 3.3928620  |
| 44 H | -6.0812770 | 0.6919970  | 2.1074730  |
| 45 O | -4.1515710 | 1.3393240  | 2.6166120  |
| 46 H | -3.8605610 | 1.6928840  | 1.7382950  |
| 47 H | -4.2451070 | 0.4829120  | -0.0860110 |

## Cartesian coordinates calculated at M06-2X/6-31G level

Table S36 - Cartesian coordinates (given in Angstroms) generated for structure **O** (Figure S218), calculated at M06-2X/6-31G level, after energy minimisation calculations.

| Atom |   | X          | Y          | Z          |
|------|---|------------|------------|------------|
| 1    | C | -5.7261150 | -0.5694850 | 1.8820220  |
| 2    | N | -4.9287770 | -0.5565200 | 0.6151430  |
| 3    | C | -5.8063700 | -0.0728990 | -0.4956800 |
| 4    | C | -3.7661550 | 0.3791840  | 0.7949410  |
| 5    | C | -4.4502080 | -1.9644300 | 0.3483250  |
| 6    | C | -3.7622670 | -2.1541360 | -1.0144850 |
| 7    | O | -2.5707050 | -2.9108530 | -0.8708790 |
| 8    | P | -1.1782350 | -2.1018190 | -0.5842420 |
| 9    | O | -1.1998000 | -0.7994630 | -1.3547100 |
| 10   | O | -1.4251840 | -1.7590320 | 0.9945370  |
| 11   | C | -0.5969810 | -0.7258450 | 1.5388820  |
| 12   | O | -0.0482890 | -3.0586520 | -0.7623850 |
| 13   | H | -5.3299120 | -2.6043750 | 0.4417050  |
| 14   | H | -3.7414520 | -2.2033220 | 1.1432820  |
| 15   | H | -3.5247100 | -1.2011770 | -1.4963550 |
| 16   | H | -4.4135090 | -2.7179230 | -1.6849260 |
| 17   | H | -0.7911030 | -0.6989720 | 2.6129970  |
| 18   | H | -0.8422160 | 0.2472020  | 1.0990090  |
| 19   | H | 0.4634330  | -0.9592040 | 1.3792410  |
| 20   | H | -6.5982940 | -0.8045460 | -0.6593370 |
| 21   | H | -5.2111470 | 0.0530450  | -1.3989510 |
| 22   | H | -6.2318870 | 0.8869450  | -0.2027580 |
| 23   | H | -5.1088220 | -0.9909860 | 2.6752860  |
| 24   | H | -6.6179970 | -1.1778060 | 1.7306690  |
| 25   | H | -6.0033650 | 0.4560640  | 2.1252780  |
| 26   | H | -3.2398400 | 0.1053100  | 1.7083070  |
| 27   | H | -4.1445450 | 1.4003170  | 0.8656180  |
| 28   | H | -3.0811480 | 0.2816830  | -0.0495760 |
| 29   | C | 4.5807310  | 1.2167850  | -0.0264980 |
| 30   | C | 3.3014780  | 1.6237670  | -0.3820590 |
| 31   | C | 2.3078140  | 0.6609220  | -0.6283950 |
| 32   | C | 2.6363590  | -0.7041070 | -0.5207270 |
| 33   | C | 3.9168620  | -1.0954790 | -0.1658790 |
| 34   | C | 4.8970290  | -0.1352660 | 0.0842400  |
| 35   | C | 6.2611750  | -0.5472550 | 0.5302090  |
| 36   | N | 1.0051420  | 0.9633830  | -0.9968250 |
| 37   | C | 0.3694800  | 2.1968420  | -0.9497570 |
| 38   | O | 0.9277590  | 3.2447100  | -0.6346450 |
| 39   | N | -0.9313130 | 2.1195870  | -1.3624640 |
| 40   | C | -1.8504850 | 3.1661860  | -0.9699470 |
| 41   | C | -2.3336710 | 3.0777240  | 0.5037160  |
| 42   | O | -1.6929220 | 2.3251470  | 1.2744530  |
| 43   | O | -3.3413360 | 3.7739980  | 0.7708040  |
| 44   | F | 7.2145920  | 0.2913510  | 0.0869960  |
| 45   | F | 6.5851670  | -1.7798900 | 0.1036390  |
| 46   | F | 6.3770280  | -0.5686920 | 1.8736450  |
| 47   | H | 5.3448290  | 1.9661560  | 0.1576300  |
| 48   | H | 3.0595130  | 2.6727200  | -0.4698410 |
| 49   | H | 1.8711230  | -1.4552920 | -0.7131910 |
| 50   | H | 4.1551390  | -2.1514860 | -0.0866330 |
| 51   | H | 0.3852570  | 0.1657360  | -1.1714450 |
| 52   | H | -1.3148480 | 1.1755570  | -1.3755690 |
| 53   | H | -2.7242440 | 3.1370350  | -1.6271660 |
| 54   | H | -1.3613830 | 4.1326380  | -1.1199980 |

Table S37 - Cartesian coordinates (given in Angstroms) generated for structure **P** (Figure S220), calculated at M06-2X/6-31G level, after energy minimisation calculations.

| Atom | X          | Y          | Z          |
|------|------------|------------|------------|
| 1 O  | 2.7495590  | -2.3803560 | 0.4335420  |
| 2 C  | 3.1436980  | -2.9699330 | -0.6070680 |
| 3 C  | 2.7605660  | -2.3505110 | -1.9790730 |
| 4 N  | 1.8636030  | -1.2173270 | -1.9459580 |
| 5 C  | 0.5594810  | -1.4201770 | -1.6347680 |
| 6 N  | -0.1556950 | -0.2474140 | -1.4145190 |
| 7 C  | -1.5113620 | -0.1481540 | -1.1153750 |
| 8 C  | -2.4407490 | -1.1852010 | -1.3012820 |
| 9 C  | -3.7768260 | -0.9836510 | -0.9730090 |
| 10 C | -4.2109750 | 0.2373430  | -0.4669200 |
| 11 C | -5.6361630 | 0.4403920  | -0.0691190 |
| 12 F | -6.4580150 | -0.4573460 | -0.6363560 |
| 13 F | -5.8165030 | 0.3376030  | 1.2632410  |
| 14 F | -6.0832510 | 1.6628830  | -0.4106350 |
| 15 C | -3.2945440 | 1.2744760  | -0.2865540 |
| 16 C | -1.9606030 | 1.0873440  | -0.6053550 |
| 17 O | 0.0492860  | -2.5402480 | -1.5695410 |
| 18 O | 3.8370650  | -4.0040040 | -0.6813500 |
| 19 H | 2.3219400  | -3.1431150 | -2.5909650 |
| 20 H | 3.6838890  | -2.0332750 | -2.4736570 |
| 21 H | 2.2834220  | -0.2916800 | -1.8167890 |
| 22 H | 0.3649340  | 0.6326960  | -1.3117480 |
| 23 H | -2.1101870 | -2.1339590 | -1.6963640 |
| 24 H | -4.4890860 | -1.7884760 | -1.1242890 |
| 25 H | -3.6278430 | 2.2328750  | 0.1005810  |
| 26 H | -1.2379020 | 1.8871630  | -0.4729490 |
| 27 C | -0.4980730 | -0.4535540 | 3.6844040  |
| 28 N | 0.5847520  | -0.7663770 | 2.7019910  |
| 29 C | 1.6683350  | -1.5516130 | 3.3773480  |
| 30 C | 0.0132850  | -1.6033400 | 1.5960600  |
| 31 C | 1.1128680  | 0.5436450  | 2.1663980  |
| 32 C | 2.4454170  | 0.4520120  | 1.4257240  |
| 33 O | 2.7843120  | 1.7794820  | 1.0383720  |
| 34 P | 2.4526090  | 2.1770200  | -0.5211350 |
| 35 O | 0.9626990  | 2.2809300  | -0.7029760 |
| 36 O | 3.0523640  | 3.6769070  | -0.5113790 |
| 37 C | 4.4678450  | 3.8235280  | -0.4047990 |
| 38 O | 3.2323450  | 1.2720230  | -1.4341200 |
| 39 H | 1.2244640  | 1.2123290  | 3.0238380  |
| 40 H | 0.3483380  | 0.9497250  | 1.4962640  |
| 41 H | 2.3987270  | -0.2352480 | 0.5744550  |
| 42 H | 3.2404940  | 0.0981920  | 2.0865330  |
| 43 H | 4.9702180  | 3.3004590  | -1.2224980 |
| 44 H | 4.8225920  | 3.4300920  | 0.5525160  |
| 45 H | 4.6831980  | 4.8909340  | -0.4622810 |
| 46 H | 2.1809580  | -0.9042120 | 4.0904090  |
| 47 H | 2.3461060  | -1.9282600 | 2.6078900  |
| 48 H | 1.1975220  | -2.3840380 | 3.9015010  |
| 49 H | -1.2458140 | 0.1661570  | 3.1874210  |
| 50 H | -0.0635910 | 0.0808530  | 4.5294170  |
| 51 H | -0.9451250 | -1.3899150 | 4.0179150  |
| 52 H | -0.8056960 | -1.0502790 | 1.1354170  |
| 53 H | -0.3652690 | -2.5251950 | 2.0414000  |
| 54 H | 0.8116410  | -1.8330590 | 0.8861000  |

Table S38 - Cartesian coordinates (given in Angstroms) generated for structure **Q** (Figure S221), calculated at M06-2X/6-31G level, after energy minimisation calculations.

| Atom | X          | Y          | Z          |
|------|------------|------------|------------|
| 1 C  | -2.6689970 | 3.5241850  | -0.1659850 |
| 2 C  | -2.6913550 | 2.4872960  | -1.2915410 |
| 3 N  | -1.8388910 | 1.3530450  | -1.0347330 |
| 4 C  | -0.5026500 | 1.5684150  | -0.8875000 |
| 5 N  | 0.2366050  | 0.4139930  | -0.7310420 |
| 6 C  | 1.6055790  | 0.3128480  | -0.4957900 |
| 7 C  | 2.4903160  | 1.4026480  | -0.4532570 |
| 8 C  | 3.8412010  | 1.1815670  | -0.2134410 |
| 9 C  | 4.3314960  | -0.1066480 | -0.0185780 |
| 10 C | 5.7757400  | -0.3183920 | 0.2989980  |
| 11 F | 6.5639070  | 0.5984440  | -0.2886810 |
| 12 F | 6.0267120  | -0.2386160 | 1.6216010  |
| 13 F | 6.2085600  | -1.5288820 | -0.0944840 |
| 14 C | 3.4567110  | -1.1924600 | -0.0622520 |
| 15 C | 2.1083090  | -0.9868410 | -0.2985060 |
| 16 O | -0.0285910 | 2.7051750  | -0.8873890 |
| 17 O | -2.7283120 | 3.0538180  | 1.0654940  |
| 18 O | -2.6281720 | 4.7148020  | -0.4004030 |
| 19 H | -2.4151090 | 3.0113660  | -2.2110490 |
| 20 H | -3.7143520 | 2.1111090  | -1.3971690 |
| 21 H | -2.2533150 | 0.4157480  | -1.0592570 |
| 22 H | -0.2645280 | -0.4871650 | -0.7526910 |
| 23 H | 2.1154710  | 2.4032480  | -0.6090610 |
| 24 H | 4.5214690  | 2.0273520  | -0.1865970 |
| 25 H | 3.8331350  | -2.2000110 | 0.0838090  |
| 26 H | 1.4160460  | -1.8232490 | -0.3337300 |
| 27 H | -2.7254020 | 0.7608780  | 3.2557870  |
| 28 H | -4.7372760 | 0.9935280  | 1.7315880  |
| 29 C | -3.1472920 | 0.0080760  | 2.5809100  |
| 30 H | -3.8487880 | -0.6059450 | 3.1582380  |
| 31 N | -3.8043380 | 0.6915280  | 1.4553620  |
| 32 H | -3.0343950 | 2.0635700  | 1.1075000  |
| 33 C | -2.0306500 | -0.8883770 | 2.0832210  |
| 34 H | -3.9166390 | 0.0405080  | 0.6700440  |
| 35 H | -1.4374620 | -1.2526700 | 2.9256730  |
| 36 H | -1.3630930 | -0.3315910 | 1.4113920  |
| 37 O | -2.5856970 | -2.0321310 | 1.4247720  |
| 38 O | -3.2991870 | -1.0942560 | -0.8623130 |
| 39 P | -2.4220430 | -2.1271310 | -0.1902630 |
| 40 O | -0.9623830 | -2.1287780 | -0.5692190 |
| 41 O | -3.0713000 | -3.6026820 | -0.3264790 |
| 42 H | -4.0362190 | -3.3757110 | -2.1554310 |
| 43 C | -3.3293400 | -4.0461230 | -1.6583920 |
| 44 H | -3.7592860 | -5.0449510 | -1.5842540 |
| 45 H | -2.4011200 | -4.0922560 | -2.2369130 |

Table 39 - Cartesian coordinates (given in Angstroms) generated for structure **R** (Figure S221), calculated at M06-2X/6-31G level, after energy minimisation calculations.

| Atom  |   | X          | Y          | Z          |
|-------|---|------------|------------|------------|
| ----- |   | -----      | -----      | -----      |
| 1     | C | -3.7849500 | 2.3981670  | -0.2974220 |
| 2     | C | -2.4184860 | 3.0638070  | -0.5342490 |
| 3     | N | -1.4387600 | 2.0373520  | -0.8282090 |
| 4     | C | -0.1400360 | 2.1662350  | -0.4526910 |
| 5     | N | 0.5475650  | 0.9638460  | -0.5181310 |
| 6     | C | 1.8984890  | 0.7420930  | -0.3014830 |
| 7     | C | 2.8555060  | 1.7577860  | -0.1368530 |
| 8     | C | 4.1911690  | 1.4211310  | 0.0420920  |
| 9     | C | 4.5986140  | 0.0894080  | 0.0604710  |
| 10    | C | 6.0324290  | -0.2509100 | 0.3033020  |
| 11    | F | 6.8640610  | 0.6839050  | -0.1895920 |
| 12    | F | 6.3231380  | -0.3574730 | 1.6156820  |
| 13    | F | 6.3746940  | -1.4248450 | -0.2545200 |
| 14    | C | 3.6528380  | -0.9237850 | -0.0987010 |
| 15    | C | 2.3191310  | -0.6008110 | -0.2776510 |
| 16    | O | 0.3602870  | 3.2325490  | -0.0962850 |
| 17    | O | -3.9880810 | 1.3477110  | -0.9938750 |
| 18    | O | -4.5579950 | 2.8940710  | 0.5320950  |
| 19    | H | -2.1223010 | 3.6216440  | 0.3566170  |
| 20    | H | -2.5111240 | 3.7823420  | -1.3608010 |
| 21    | H | -1.8118470 | 1.1153800  | -1.0568140 |
| 22    | H | -0.0356790 | 0.1319620  | -0.6616090 |
| 23    | H | 2.5444770  | 2.7922330  | -0.1541090 |
| 24    | H | 4.9273210  | 2.2105980  | 0.1596450  |
| 25    | H | 3.9606620  | -1.9645210 | -0.0894390 |
| 26    | H | 1.5788820  | -1.3862430 | -0.4067710 |
| 27    | H | -4.7427800 | 0.8021550  | 2.1273170  |
| 28    | H | -6.1426880 | -0.4709950 | 0.5938190  |
| 29    | C | -4.4598770 | -0.2005880 | 1.8002820  |
| 30    | H | -4.8199580 | -0.9410100 | 2.5168420  |
| 31    | N | -5.1274020 | -0.4401690 | 0.4910230  |
| 32    | H | -4.8376640 | 0.3583170  | -0.1930960 |
| 33    | C | -2.9460740 | -0.2861050 | 1.6763550  |
| 34    | H | -4.7938050 | -1.3254100 | 0.0491330  |
| 35    | H | -2.5135900 | -0.0423160 | 2.6498360  |
| 36    | H | -2.5630580 | 0.4279570  | 0.9402960  |
| 37    | O | -2.5212920 | -1.6049710 | 1.3485700  |
| 38    | O | -3.6198930 | -2.3607540 | -0.8423320 |
| 39    | P | -2.2959020 | -1.9964450 | -0.2214720 |
| 40    | O | -1.4456210 | -0.9582270 | -0.9097360 |
| 41    | O | -1.4238820 | -3.3290860 | 0.0868790  |
| 42    | H | -1.8883950 | -4.3955590 | -1.6391390 |
| 43    | C | -1.0171920 | -4.0713680 | -1.0614140 |
| 44    | H | -0.4717610 | -4.9447660 | -0.7036270 |
| 45    | H | -0.3625480 | -3.4672870 | -1.6976960 |



Table S40 - Cartesian coordinates (given in Angstroms) generated for structure **S** (Figure S221), calculated at M06-2X/6-31G level, after energy minimisation calculations.

| Atom |   | X          | Y          | Z          |
|------|---|------------|------------|------------|
| 1    | C | -3.4902090 | -1.6466640 | -0.1270090 |
| 2    | C | -2.1620980 | -1.8456610 | -0.4818740 |
| 3    | C | -1.3274880 | -0.7372150 | -0.6973130 |
| 4    | C | -1.8542280 | 0.5589150  | -0.5488550 |
| 5    | C | -3.1807460 | 0.7429510  | -0.1961750 |
| 6    | C | -4.0064010 | -0.3610970 | 0.0152150  |
| 7    | C | -5.4228600 | -0.1705780 | 0.4499120  |
| 8    | N | 0.0088340  | -0.8253990 | -1.0697670 |
| 9    | C | 0.7922070  | -1.9580600 | -1.1428770 |
| 10   | O | 0.4148510  | -3.0901770 | -0.8593880 |
| 11   | N | 2.0570910  | -1.6808560 | -1.6074870 |
| 12   | C | 3.1297130  | -2.6128070 | -1.3303560 |
| 13   | C | 3.7411410  | -2.3384220 | 0.0408710  |
| 14   | O | 2.8405650  | -2.3933200 | 1.0073070  |
| 15   | O | 4.9092280  | -2.0461230 | 0.2075520  |
| 16   | F | -6.2266480 | -1.1471180 | -0.0062720 |
| 17   | F | -5.9315600 | 0.9980400  | 0.0233920  |
| 18   | F | -5.5536910 | -0.1731720 | 1.7918860  |
| 19   | H | -4.1336710 | -2.5067970 | 0.0318220  |
| 20   | H | -1.7651110 | -2.8437540 | -0.5959320 |
| 21   | H | -1.2060940 | 1.4177720  | -0.7130550 |
| 22   | H | -3.5777720 | 1.7474310  | -0.0891170 |
| 23   | H | 0.4926720  | 0.0606370  | -1.2727370 |
| 24   | H | 2.2975620  | -0.6927380 | -1.7028060 |
| 25   | H | 3.9113190  | -2.5233420 | -2.0857330 |
| 26   | H | 2.7141130  | -3.6228230 | -1.3515580 |
| 27   | H | 3.1839300  | -1.8844220 | 1.8403540  |
| 28   | N | 3.3357930  | -0.7384480 | 2.9746840  |
| 29   | H | 3.1053020  | -1.0948380 | 3.9001810  |
| 30   | H | 4.2676310  | -0.3317230 | 3.0480410  |
| 31   | C | 2.3587310  | 0.2863440  | 2.5728810  |
| 32   | C | 2.7491730  | 0.8602150  | 1.2223240  |
| 33   | O | 1.7292730  | 1.7607060  | 0.8137360  |
| 34   | P | 1.9146150  | 2.3727240  | -0.7005020 |
| 35   | O | 1.7876750  | 1.2377560  | -1.6916120 |
| 36   | O | 0.5114000  | 3.1887880  | -0.7795180 |
| 37   | C | 0.3623510  | 4.3208280  | 0.0738040  |
| 38   | O | 3.0953670  | 3.2843430  | -0.7459000 |
| 39   | H | 2.2698830  | 1.0978080  | 3.3047060  |
| 40   | H | 1.3807360  | -0.1955390 | 2.4781300  |
| 41   | H | 2.8395020  | 0.0518420  | 0.4874430  |
| 42   | H | 3.7134660  | 1.3825580  | 1.2852800  |
| 43   | H | -0.5803450 | 4.8016040  | -0.1905600 |
| 44   | H | 1.1884170  | 5.0221600  | -0.0727760 |
| 45   | H | 0.3317090  | 4.0082110  | 1.1220730  |

Table S41 - Cartesian coordinates (given in Angstroms) generated for structure **T** (Figure S222), calculated at M06-2X/6-31G level, after energy minimisation calculations.

| Atom | X          | Y          | Z          |
|------|------------|------------|------------|
| 1 O  | -3.7766150 | 0.8500320  | -1.1784820 |
| 2 C  | -3.6663020 | 2.0513820  | -0.8124970 |
| 3 C  | -2.3465680 | 2.7483860  | -1.1909890 |
| 4 N  | -1.3132690 | 1.7537800  | -1.3980040 |
| 5 C  | -0.0366810 | 1.9758190  | -0.9783650 |
| 6 N  | 0.7075220  | 0.8111250  | -0.9085860 |
| 7 C  | 2.0431750  | 0.6794150  | -0.5569670 |
| 8 C  | 2.9457620  | 1.7521800  | -0.4640710 |
| 9 C  | 4.2720970  | 1.5092910  | -0.1300360 |
| 10 C | 4.7220990  | 0.2134870  | 0.1093610  |
| 11 C | 6.1374240  | -0.0252430 | 0.5204510  |
| 12 F | 6.9758640  | 0.8941730  | 0.0105580  |
| 13 F | 6.3010160  | 0.0187140  | 1.8587310  |
| 14 F | 6.5817060  | -1.2324940 | 0.1282030  |
| 15 C | 3.8293270  | -0.8553620 | 0.0188030  |
| 16 C | 2.5036390  | -0.6285730 | -0.3098900 |
| 17 O | 0.3969570  | 3.0942450  | -0.7004060 |
| 18 O | -4.5018040 | 2.7269810  | -0.1709160 |
| 19 H | -2.0529470 | 3.4302200  | -0.3890530 |
| 20 H | -2.5123330 | 3.3564470  | -2.0912150 |
| 21 H | -1.6540850 | 0.7940910  | -1.4770460 |
| 22 H | 0.1753530  | -0.0644720 | -1.0333050 |
| 23 H | 2.6000040  | 2.7579940  | -0.6543610 |
| 24 H | 4.9670560  | 2.3411070  | -0.0662250 |
| 25 H | 4.1743500  | -1.8680750 | 0.2038170  |
| 26 H | 1.8019730  | -1.4598120 | -0.3676730 |
| 27 C | -3.5649660 | 1.0878160  | 2.3239740  |
| 28 C | -3.5268250 | -0.3858390 | 1.8555310  |
| 29 C | -2.1145950 | -0.6741290 | 1.3623470  |
| 30 O | -1.9711070 | -2.0413700 | 1.0014290  |
| 31 P | -1.1254070 | -2.4681780 | -0.3334660 |
| 32 O | 0.1273670  | -3.1866550 | 0.0517580  |
| 33 O | -2.1431880 | -3.5777270 | -0.9497890 |
| 34 C | -3.3977160 | -3.0951870 | -1.4275190 |
| 35 O | -1.0564910 | -1.2835540 | -1.2726700 |
| 36 O | -4.5027240 | -0.6746920 | 0.8839510  |
| 37 H | -3.7541980 | -1.0406460 | 2.7065640  |
| 38 H | -1.3887380 | -0.4286970 | 2.1508280  |
| 39 H | -1.9118530 | -0.0376420 | 0.4950180  |
| 40 H | -3.2536690 | -2.4793630 | -2.3207460 |
| 41 H | -3.8992960 | -2.5009080 | -0.6561940 |
| 42 H | -4.0034380 | -3.9674810 | -1.6795090 |
| 43 H | -2.9013840 | 1.6909870  | 1.6816480  |
| 44 H | -3.1640240 | 1.1495400  | 3.3426510  |
| 45 O | -4.8596850 | 1.6357080  | 2.3250360  |
| 46 H | -5.0115820 | 1.9243790  | 1.3993370  |
| 47 H | -4.3180480 | -0.1172650 | 0.0860760  |

Table S42 - Cartesian coordinates (given in Angstroms) generated for structure **U** (Figure S222), calculated at M06-2X/6-31G level, after energy minimisation calculations.

| Atom | X          | Y          | Z          |
|------|------------|------------|------------|
| 1 O  | 4.0828140  | -2.5197110 | -0.1362980 |
| 2 C  | 2.8291720  | -2.5378530 | -0.2187050 |
| 3 C  | 2.1941930  | -2.7863590 | -1.6019360 |
| 4 N  | 1.1757500  | -1.7872140 | -1.8731000 |
| 5 C  | -0.0854150 | -1.9817290 | -1.3613710 |
| 6 N  | -0.7215840 | -0.7840530 | -1.0876100 |
| 7 C  | -2.0305020 | -0.5896990 | -0.6669130 |
| 8 C  | -3.0136380 | -1.5918780 | -0.6565890 |
| 9 C  | -4.3037660 | -1.2869510 | -0.2382690 |
| 10 C | -4.6351810 | 0.0024920  | 0.1663500  |
| 11 C | -6.0070400 | 0.3186500  | 0.6635960  |
| 12 F | -6.9275920 | -0.5528530 | 0.2187170  |
| 13 F | -6.0831610 | 0.2983100  | 2.0099630  |
| 14 F | -6.4072790 | 1.5474660  | 0.2876670  |
| 15 C | -3.6604140 | 1.0021710  | 0.1566960  |
| 16 C | -2.3710260 | 0.7131000  | -0.2539940 |
| 17 O | -0.6009760 | -3.0866650 | -1.2180370 |
| 18 O | 2.0195730  | -2.3314400 | 0.7216480  |
| 19 H | 1.7190840  | -3.7706040 | -1.6206100 |
| 20 H | 2.9646040  | -2.7499880 | -2.3752400 |
| 21 H | 1.5100220  | -0.8274880 | -1.7771830 |
| 22 H | -0.1130030 | 0.0446950  | -1.0972690 |
| 23 H | -2.7592070 | -2.5929710 | -0.9731430 |
| 24 H | -5.0609500 | -2.0649540 | -0.2375890 |
| 25 H | -3.9149380 | 2.0112130  | 0.4674430  |
| 26 H | -1.6058100 | 1.4894160  | -0.2567410 |
| 27 C | 4.2629650  | -0.5394670 | 2.7289120  |
| 28 C | 4.0738790  | 0.5224720  | 1.6309200  |
| 29 C | 2.6091660  | 0.9235160  | 1.5045760  |
| 30 O | 2.5296360  | 2.1399640  | 0.7627550  |
| 31 P | 1.4981730  | 2.3038630  | -0.4884250 |
| 32 O | 0.2273160  | 2.9686090  | -0.0632460 |
| 33 O | 2.3537830  | 3.3879690  | -1.3487110 |
| 34 C | 3.5558690  | 2.9099680  | -1.9482450 |
| 35 O | 1.4283660  | 1.0034650  | -1.2574530 |
| 36 O | 4.6145660  | 0.1370030  | 0.3814250  |
| 37 H | 4.6338910  | 1.4201190  | 1.9251920  |
| 38 H | 2.1739080  | 1.0889600  | 2.4971250  |
| 39 H | 2.0538530  | 0.1233600  | 1.0029740  |
| 40 H | 3.3265780  | 2.3121310  | -2.8352770 |
| 41 H | 4.1269700  | 2.2977910  | -1.2421100 |
| 42 H | 4.1429590  | 3.7830730  | -2.2385070 |
| 43 H | 4.4409900  | -0.0294170 | 3.6828180  |
| 44 H | 5.1775490  | -1.1042350 | 2.4843790  |
| 45 O | 3.1583600  | -1.3860420 | 2.9399450  |
| 46 H | 2.8642300  | -1.7881140 | 2.0808990  |
| 47 H | 4.4127170  | -0.8141880 | 0.2306910  |

Table S43 - Cartesian coordinates (given in Angstroms) generated for structure **V** (Figure S222), calculated at M06-2X/6-31G level, after energy minimisation calculations.

| Atom | X          | Y          | Z          |
|------|------------|------------|------------|
| 1 C  | 3.2038190  | -2.5900630 | -0.1836890 |
| 2 C  | 2.3404100  | -2.9957220 | -1.3974560 |
| 3 N  | 1.3295560  | -1.9716600 | -1.6166400 |
| 4 C  | 0.0711180  | -2.1186490 | -1.1073950 |
| 5 N  | -0.6399620 | -0.9291660 | -1.1300350 |
| 6 C  | -1.9340130 | -0.7017820 | -0.6791830 |
| 7 C  | -2.8418320 | -1.7195450 | -0.3444870 |
| 8 C  | -4.1221510 | -1.3882440 | 0.0821600  |
| 9 C  | -4.5218240 | -0.0583330 | 0.1749530  |
| 10 C | -5.8835150 | 0.2899100  | 0.6795420  |
| 11 F | -6.7695070 | -0.7004420 | 0.4770510  |
| 12 F | -5.8933280 | 0.5416890  | 2.0045370  |
| 13 F | -6.3755380 | 1.3922850  | 0.0865460  |
| 14 C | -3.6240810 | 0.9566860  | -0.1588810 |
| 15 C | -2.3438430 | 0.6415680  | -0.5803030 |
| 16 O | -0.3911430 | -3.1861500 | -0.7104150 |
| 17 O | 2.8230480  | -2.9464540 | 0.9482310  |
| 18 O | 4.1891630  | -1.8428130 | -0.4572610 |
| 19 H | 1.8224850  | -3.9371870 | -1.2147200 |
| 20 H | 2.9617640  | -3.0799860 | -2.2934110 |
| 21 H | 1.6579280  | -1.0149140 | -1.7584920 |
| 22 H | -0.1031920 | -0.1089710 | -1.4295520 |
| 23 H | -2.5372910 | -2.7528170 | -0.4216370 |
| 24 H | -4.8202310 | -2.1804930 | 0.3341480  |
| 25 H | -3.9288370 | 1.9966280  | -0.0912880 |
| 26 H | -1.6407440 | 1.4355400  | -0.8271860 |
| 27 C | 3.9081740  | -0.3771660 | 2.6643200  |
| 28 C | 2.8979220  | 0.6828070  | 2.2316910  |
| 29 C | 2.1896240  | 0.3024030  | 0.9443620  |
| 30 O | 1.2402240  | 1.3388010  | 0.6455660  |
| 31 P | 1.2789500  | 2.0337160  | -0.8199050 |
| 32 O | 0.1929870  | 3.0585780  | -0.8769860 |
| 33 O | 2.7500150  | 2.7435590  | -0.6699680 |
| 34 C | 3.2941720  | 3.3360270  | -1.8455250 |
| 35 O | 1.3607310  | 0.9670840  | -1.8911140 |
| 36 O | 3.5699440  | 1.9214120  | 2.0805270  |
| 37 H | 2.1330920  | 0.7639430  | 3.0238550  |
| 38 H | 1.6586420  | -0.6486210 | 1.0563970  |
| 39 H | 2.9217810  | 0.1951750  | 0.1370900  |
| 40 H | 2.6385990  | 4.1323450  | -2.2136800 |
| 41 H | 3.4252400  | 2.5821040  | -2.6271630 |
| 42 H | 4.2622930  | 3.7607940  | -1.5783470 |
| 43 H | 3.3672380  | -1.3183590 | 2.8360330  |
| 44 H | 4.3410840  | -0.0507180 | 3.6185780  |
| 45 O | 4.9667150  | -0.5495270 | 1.7574420  |
| 46 H | 4.6472350  | -1.0928510 | 0.9872510  |
| 47 H | 3.1094870  | 2.4213180  | 1.3853920  |

Table S44 - Cartesian coordinates (given in Angstroms) generated for structure **W** (Figure S222), calculated at M06-2X/6-31G level, after energy minimisation calculations.

| Atom | X          | Y          | Z          |
|------|------------|------------|------------|
| 1 O  | 4.3861970  | 3.4550360  | 0.0306870  |
| 2 C  | 3.5725260  | 2.6730280  | 0.5478210  |
| 3 C  | 2.1227480  | 3.1763890  | 0.6860880  |
| 4 N  | 1.2003530  | 2.0812300  | 0.8890630  |
| 5 C  | -0.1114620 | 2.2095000  | 0.5601730  |
| 6 N  | -0.7991460 | 1.0102580  | 0.6079680  |
| 7 C  | -2.1408400 | 0.7909170  | 0.3346660  |
| 8 C  | -3.1009210 | 1.8086840  | 0.1961840  |
| 9 C  | -4.4258700 | 1.4754550  | -0.0528280 |
| 10 C | -4.8203150 | 0.1441130  | -0.1639890 |
| 11 C | -6.2398360 | -0.1828300 | -0.4906700 |
| 12 F | -7.1030570 | 0.6692020  | 0.0920960  |
| 13 F | -6.4908520 | -0.1200860 | -1.8148060 |
| 14 F | -6.5804080 | -1.4227220 | -0.0994740 |
| 15 C | -3.8714700 | -0.8697640 | -0.0285620 |
| 16 C | -2.5461510 | -0.5529400 | 0.2178840  |
| 17 O | -0.6199950 | 3.2890950  | 0.2515720  |
| 18 O | 3.8007930  | 1.5061040  | 0.9899490  |
| 19 H | 1.8545260  | 3.7316200  | -0.2169780 |
| 20 H | 2.0855860  | 3.8917450  | 1.5199710  |
| 21 H | 1.6111780  | 1.1639070  | 1.0578960  |
| 22 H | -0.2296570 | 0.1725610  | 0.8130690  |
| 23 H | -2.7992610 | 2.8420610  | 0.2862070  |
| 24 H | -5.1643860 | 2.2655950  | -0.1530840 |
| 25 H | -4.1703320 | -1.9096930 | -0.1154090 |
| 26 H | -1.8012780 | -1.3424160 | 0.3074680  |
| 27 C | 4.8195980  | 0.4755390  | -1.8161420 |
| 28 C | 3.8948330  | -0.7425100 | -1.9072960 |
| 29 C | 2.7905940  | -0.6461660 | -0.8707160 |
| 30 O | 1.8888580  | -1.7458420 | -1.0062560 |
| 31 P | 1.1182320  | -2.2092830 | 0.3471050  |
| 32 O | -0.0665940 | -3.0325580 | -0.0470070 |
| 33 O | 2.2985170  | -3.1487330 | 0.9842020  |
| 34 C | 2.1114570  | -3.5466290 | 2.3369270  |
| 35 O | 0.9343630  | -1.0196140 | 1.2666330  |
| 36 O | 4.6737240  | -1.9108270 | -1.7069380 |
| 37 H | 3.4542800  | -0.8135140 | -2.9091250 |
| 38 H | 2.2352410  | 0.2935510  | -0.9872350 |
| 39 H | 3.2396980  | -0.6360730 | 0.1260270  |
| 40 H | 1.1825330  | -4.1170160 | 2.4521380  |
| 41 H | 2.0811940  | -2.6737900 | 2.9957530  |
| 42 H | 2.9550390  | -4.1825240 | 2.6097500  |
| 43 H | 4.2479370  | 1.4123220  | -1.8636210 |
| 44 H | 5.5134460  | 0.4512570  | -2.6639870 |
| 45 O | 5.5846800  | 0.4016570  | -0.6291420 |
| 46 H | 5.0329090  | 0.8358960  | 0.0797840  |
| 47 H | 5.2845820  | -1.6554680 | -0.9916010 |

Table S45 - Cartesian coordinates (given in Angstroms) generated for structure **X** (Figure S222), calculated at M06-2X/6-31G level, after energy minimisation calculations.

| Atom | X          | Y          | Z          |
|------|------------|------------|------------|
| 1 O  | -4.7621460 | 2.9608390  | 0.5096580  |
| 2 C  | -3.8395770 | 2.5505330  | -0.2137550 |
| 3 C  | -2.4174550 | 3.0417960  | 0.1317170  |
| 4 N  | -1.4262420 | 2.1266460  | -0.3865160 |
| 5 C  | -0.1182770 | 2.2235470  | -0.0449890 |
| 6 N  | 0.6405850  | 1.1682220  | -0.5244100 |
| 7 C  | 1.9959640  | 0.9446520  | -0.3340660 |
| 8 C  | 2.8884000  | 1.8658690  | 0.2402710  |
| 9 C  | 4.2306750  | 1.5317020  | 0.3693420  |
| 10 C | 4.7080450  | 0.2971260  | -0.0650040 |
| 11 C | 6.1439330  | -0.0554970 | 0.1419160  |
| 12 F | 6.9571430  | 0.9996070  | -0.0465200 |
| 13 F | 6.3904820  | -0.4948730 | 1.3928290  |
| 14 F | 6.5541490  | -1.0284140 | -0.6894650 |
| 15 C | 3.8280240  | -0.6186820 | -0.6429500 |
| 16 C | 2.4896530  | -0.2956150 | -0.7803810 |
| 17 O | 0.3305650  | 3.1589830  | 0.6190480  |
| 18 O | -3.9271150 | 1.7720940  | -1.2096310 |
| 19 H | -2.3297990 | 3.1307020  | 1.2190430  |
| 20 H | -2.2813620 | 4.0493110  | -0.2851930 |
| 21 H | -1.7751780 | 1.3527730  | -0.9442230 |
| 22 H | 0.1106890  | 0.3705870  | -0.9090520 |
| 23 H | 2.5221410  | 2.8231530  | 0.5808990  |
| 24 H | 4.9171430  | 2.2490650  | 0.8096880  |
| 25 H | 4.1912700  | -1.5803150 | -0.9915910 |
| 26 H | 1.7923000  | -0.9962490 | -1.2301610 |
| 27 C | -5.6212510 | -0.5127740 | 0.6539050  |
| 28 C | -4.3667360 | -1.3319400 | 0.9632900  |
| 29 C | -3.1254220 | -0.5161000 | 0.6465410  |
| 30 O | -1.9290430 | -1.2212010 | 0.9928340  |
| 31 P | -1.1391120 | -1.9729270 | -0.2175320 |
| 32 O | -0.9150200 | -1.0052530 | -1.3584710 |
| 33 O | 0.2433000  | -2.1939830 | 0.6110950  |
| 34 C | 1.0665180  | -3.2813180 | 0.2017060  |
| 35 O | -1.7902050 | -3.2967660 | -0.5141980 |
| 36 O | -4.4188110 | -2.5261200 | 0.2103820  |
| 37 H | -4.3661840 | -1.5540250 | 2.0452250  |
| 38 H | -3.1315030 | 0.4149310  | 1.2248940  |
| 39 H | -3.1237230 | -0.2591500 | -0.4153420 |
| 40 H | 2.0011450  | -3.2008880 | 0.7588780  |
| 41 H | 1.2901510  | -3.2350340 | -0.8706950 |
| 42 H | 0.5811040  | -4.2360350 | 0.4211330  |
| 43 H | -5.6268950 | 0.3781810  | 1.3003080  |
| 44 H | -6.4932220 | -1.1233570 | 0.9166870  |
| 45 O | -5.7461690 | -0.1620580 | -0.7038410 |
| 46 H | -5.1490260 | 0.6065230  | -0.8866610 |
| 47 H | -3.5165260 | -2.8992990 | 0.1237700  |

Table S46 - Cartesian coordinates (given in Angstroms) generated for structure **Y** (Figure S222), calculated at M06-2X/6-31G level, after energy minimisation calculations.

| Atom | X          | Y          | Z          |
|------|------------|------------|------------|
| 1 O  | 3.8951440  | 1.4290000  | -0.6196770 |
| 2 C  | 3.7093130  | 2.6648050  | -0.3654780 |
| 3 C  | 2.2494080  | 3.0900080  | -0.1253740 |
| 4 N  | 1.3370310  | 1.9854830  | -0.2975240 |
| 5 C  | 0.0024840  | 2.1515250  | -0.1333220 |
| 6 N  | -0.7205570 | 1.0050800  | -0.4304040 |
| 7 C  | -2.0771030 | 0.7820940  | -0.2558220 |
| 8 C  | -2.9889600 | 1.7453980  | 0.2088080  |
| 9 C  | -4.3312050 | 1.4142150  | 0.3512920  |
| 10 C | -4.7901820 | 0.1379520  | 0.0393560  |
| 11 C | -6.2412700 | -0.1965660 | 0.1456400  |
| 12 F | -6.8789670 | 0.5756400  | 1.0418670  |
| 13 F | -6.8949790 | -0.0382720 | -1.0237070 |
| 14 F | -6.4366910 | -1.4761420 | 0.5114950  |
| 15 C | -3.8902680 | -0.8230050 | -0.4249900 |
| 16 C | -2.5516030 | -0.5067650 | -0.5703570 |
| 17 O | -0.5028180 | 3.2125100  | 0.2382960  |
| 18 O | 4.5675500  | 3.5504480  | -0.2899120 |
| 19 H | 2.0139290  | 3.9123940  | -0.8126790 |
| 20 H | 2.1769130  | 3.5034070  | 0.8879030  |
| 21 H | 1.7170900  | 1.0922350  | -0.6166110 |
| 22 H | -0.1530160 | 0.2064730  | -0.7417410 |
| 23 H | -2.6359350 | 2.7355000  | 0.4564490  |
| 24 H | -5.0266080 | 2.1630110  | 0.7178490  |
| 25 H | -4.2374850 | -1.8234780 | -0.6643780 |
| 26 H | -1.8492760 | -1.2601380 | -0.9158080 |
| 27 C | 5.7409150  | -0.9515600 | 0.8091060  |
| 28 C | 4.2895860  | -1.3763540 | 1.0494770  |
| 29 C | 3.7208140  | -2.0726020 | -0.1788250 |
| 30 O | 2.4602350  | -2.6608410 | 0.1337390  |
| 31 P | 1.0912330  | -2.1639530 | -0.6034110 |
| 32 O | 0.5372230  | -3.2483550 | -1.4699530 |
| 33 O | 0.0954600  | -2.0554020 | 0.6816370  |
| 34 C | 0.4593770  | -1.1885690 | 1.7512580  |
| 35 O | 1.3122960  | -0.7821250 | -1.1810820 |
| 36 O | 3.4695230  | -0.2965220 | 1.4464210  |
| 37 H | 4.2805540  | -2.0870070 | 1.8870360  |
| 38 H | 4.3963340  | -2.8711340 | -0.5085080 |
| 39 H | 3.6120080  | -1.3434650 | -0.9861280 |
| 40 H | 0.8587800  | -0.2430060 | 1.3749160  |
| 41 H | 1.2235320  | -1.6580290 | 2.3771240  |
| 42 H | -0.4457120 | -1.0039980 | 2.3349330  |
| 43 H | 6.3794710  | -1.8430290 | 0.8048640  |
| 44 H | 6.0507370  | -0.3248980 | 1.6601430  |
| 45 O | 5.9507210  | -0.2983090 | -0.4249450 |
| 46 H | 5.3242710  | 0.4621090  | -0.4859870 |
| 47 H | 3.4358360  | 0.3306820  | 0.6895870  |

Table S47 - Cartesian coordinates (given in Angstroms) generated for structure **Z** (Figure S222), calculated at M06-2X/6-31G level, after energy minimisation calculations.

| Atom | X          | Y          | Z          |
|------|------------|------------|------------|
| 1 O  | 2.3712590  | -2.1842030 | -0.1821660 |
| 2 C  | 3.1222560  | -2.3572620 | -1.1885200 |
| 3 C  | 2.6774090  | -1.6721360 | -2.5045270 |
| 4 N  | 1.7165710  | -0.6051810 | -2.3284520 |
| 5 C  | 0.4146400  | -0.9444480 | -2.0898360 |
| 6 N  | -0.3143150 | 0.0763470  | -1.4987190 |
| 7 C  | -1.6412110 | 0.0344660  | -1.0885890 |
| 8 C  | -2.5468870 | -0.9899230 | -1.4111430 |
| 9 C  | -3.8579050 | -0.9200750 | -0.9541050 |
| 10 C | -4.2917170 | 0.1557660  | -0.1853590 |
| 11 C | -5.6859500 | 0.1978780  | 0.3465670  |
| 12 F | -6.5380370 | -0.5314100 | -0.3934050 |
| 13 F | -5.7722300 | -0.2800440 | 1.6051960  |
| 14 F | -6.1711030 | 1.4522230  | 0.3914390  |
| 15 C | -3.3973080 | 1.1785780  | 0.1356270  |
| 16 C | -2.0885010 | 1.1203320  | -0.3088950 |
| 17 O | -0.0734100 | -2.0245720 | -2.4185660 |
| 18 O | 4.1663420  | -3.0291730 | -1.2458470 |
| 19 H | 2.2467650  | -2.4314690 | -3.1629900 |
| 20 H | 3.5666390  | -1.2724220 | -2.9989600 |
| 21 H | 2.1037740  | 0.1951590  | -1.8192170 |
| 22 H | 0.2008490  | 0.9106510  | -1.1822420 |
| 23 H | -2.2182560 | -1.8247890 | -2.0117710 |
| 24 H | -4.5522290 | -1.7142370 | -1.2106720 |
| 25 H | -3.7280400 | 2.0239200  | 0.7315660  |
| 26 H | -1.3811470 | 1.9087740  | -0.0652890 |
| 27 C | 0.8399370  | -1.8704930 | 2.8395470  |
| 28 C | 1.8875670  | -0.7801590 | 2.6061180  |
| 29 C | 1.3976860  | 0.2179110  | 1.5747960  |
| 30 O | 2.2960330  | 1.3304240  | 1.5264520  |
| 31 P | 2.3420120  | 2.0973300  | 0.0925160  |
| 32 O | 0.9327430  | 2.3757100  | -0.3784310 |
| 33 O | 3.0343620  | 3.4542080  | 0.6632350  |
| 34 C | 3.3822430  | 4.4197220  | -0.3240240 |
| 35 O | 3.2628110  | 1.4008070  | -0.8732320 |
| 36 O | 3.1040470  | -1.3965880 | 2.2279350  |
| 37 H | 2.0823000  | -0.2617290 | 3.5540430  |
| 38 H | 0.3909120  | 0.5753770  | 1.8295860  |
| 39 H | 1.3575130  | -0.2931410 | 0.6052720  |
| 40 H | 2.4939800  | 4.7445580  | -0.8763780 |
| 41 H | 4.1139190  | 4.0084970  | -1.0261060 |
| 42 H | 3.8156880  | 5.2743550  | 0.1966450  |
| 43 H | 0.5327210  | -2.2791380 | 1.8630640  |
| 44 H | -0.0466240 | -1.4685310 | 3.3405400  |
| 45 O | 1.3893070  | -2.8822820 | 3.6607530  |
| 46 H | 2.3151490  | -2.9401000 | 3.3629370  |
| 47 H | 2.9509390  | -1.7763620 | 1.3163420  |



Table S48 - Cartesian coordinates (given in Angstroms) generated for structure **AA** (Figure S222), calculated at M06-2X/6-31G level, after energy minimisation calculations.

| Atom | X          | Y          | Z          |
|------|------------|------------|------------|
| 1 O  | 4.0671950  | -2.0890920 | -0.8892910 |
| 2 C  | 2.8176260  | -2.1272730 | -0.9549990 |
| 3 C  | 2.1593620  | -1.8880110 | -2.3301380 |
| 4 N  | 1.1228540  | -0.8786340 | -2.2296360 |
| 5 C  | -0.1283710 | -1.2457940 | -1.8215670 |
| 6 N  | -0.8051180 | -0.2151530 | -1.1882840 |
| 7 C  | -2.1185880 | -0.2276490 | -0.7374950 |
| 8 C  | -3.0676080 | -1.2075360 | -1.0726440 |
| 9 C  | -4.3634890 | -1.1089770 | -0.5799930 |
| 10 C | -4.7386000 | -0.0470740 | 0.2382250  |
| 11 C | -6.1166310 | 0.0206970  | 0.8086740  |
| 12 F | -7.0143820 | -0.6325520 | 0.0516940  |
| 13 F | -6.1919460 | -0.5234140 | 2.0407860  |
| 14 F | -6.5483780 | 1.2886660  | 0.9349540  |
| 15 C | -3.8011940 | 0.9322460  | 0.5708090  |
| 16 C | -2.5070590 | 0.8448140  | 0.0894400  |
| 17 O | -0.6185280 | -2.3526230 | -2.0379410 |
| 18 O | 2.0169850  | -2.3177000 | 0.0039780  |
| 19 H | 1.7037450  | -2.8152750 | -2.6873570 |
| 20 H | 2.9168800  | -1.5637160 | -3.0469980 |
| 21 H | 1.4882480  | 0.0273260  | -1.9161580 |
| 22 H | -0.2405520 | 0.5775280  | -0.8464290 |
| 23 H | -2.7815340 | -2.0333010 | -1.7071160 |
| 24 H | -5.0924420 | -1.8685900 | -0.8454550 |
| 25 H | -4.0875780 | 1.7667690  | 1.2036210  |
| 26 H | -1.7660600 | 1.5984310  | 0.3418930  |
| 27 C | 3.6835400  | -1.5168190 | 2.9970910  |
| 28 C | 3.9255330  | -0.2276900 | 2.1985980  |
| 29 C | 2.6281920  | 0.3666340  | 1.6600070  |
| 30 O | 2.9030210  | 1.6675060  | 1.1302740  |
| 31 P | 2.0924110  | 2.0631040  | -0.2181200 |
| 32 O | 0.6034910  | 1.9267620  | 0.0026130  |
| 33 O | 2.5254880  | 3.6322370  | -0.1927030 |
| 34 C | 2.0232660  | 4.4170770  | -1.2689190 |
| 35 O | 2.6730410  | 1.3766240  | -1.4264410 |
| 36 O | 4.8783010  | -0.4280490 | 1.1817390  |
| 37 H | 4.3516510  | 0.5167600  | 2.8852800  |
| 38 H | 1.8961850  | 0.4687490  | 2.4709190  |
| 39 H | 2.2039640  | -0.2933950 | 0.8939070  |
| 40 H | 0.9282550  | 4.4201470  | -1.2663670 |
| 41 H | 2.3815530  | 4.0316780  | -2.2288220 |
| 42 H | 2.3890730  | 5.4346940  | -1.1268910 |
| 43 H | 2.8244930  | -1.3677150 | 3.6735130  |
| 44 H | 4.5618170  | -1.6968390 | 3.6277210  |
| 45 O | 3.5318980  | -2.6589850 | 2.1911090  |
| 46 H | 2.9142950  | -2.4840660 | 1.4314370  |
| 47 H | 4.5670450  | -1.1648240 | 0.6044060  |

Table S49 - Cartesian coordinates (given in Angstroms) generated for structure **AB** (Figure S222), calculated at M06-2X/6-31G level, after energy minimisation calculations.

| Atom | X          | Y          | Z          |
|------|------------|------------|------------|
| 1 O  | 3.9647360  | -3.4090940 | -0.9706170 |
| 2 C  | 2.9031200  | -2.7667860 | -0.8663970 |
| 3 C  | 2.3024380  | -2.2275820 | -2.1873430 |
| 4 N  | 1.3421460  | -1.1599320 | -2.0290190 |
| 5 C  | 0.0811730  | -1.4602670 | -1.6151160 |
| 6 N  | -0.6190250 | -0.3577950 | -1.1447310 |
| 7 C  | -1.9434240 | -0.3132030 | -0.7276330 |
| 8 C  | -2.8428380 | -1.3913880 | -0.7995830 |
| 9 C  | -4.1501450 | -1.2286020 | -0.3583620 |
| 10 C | -4.5876630 | -0.0097770 | 0.1536380  |
| 11 C | -5.9791710 | 0.1255240  | 0.6768000  |
| 12 F | -6.8540670 | -0.6348230 | -0.0053520 |
| 13 F | -6.0849190 | -0.2509150 | 1.9677020  |
| 14 F | -6.4229570 | 1.3934490  | 0.6173530  |
| 15 C | -3.7007060 | 1.0648930  | 0.2249460  |
| 16 C | -2.3954740 | 0.9173630  | -0.2109090 |
| 17 O | -0.4062490 | -2.5873920 | -1.6972930 |
| 18 O | 2.2577400  | -2.5218110 | 0.1938910  |
| 19 H | 1.8230390  | -3.0609370 | -2.7093160 |
| 20 H | 3.1225940  | -1.8726940 | -2.8168710 |
| 21 H | 1.7445870  | -0.2463590 | -1.8006780 |
| 22 H | -0.1128200 | 0.5339250  | -1.0510530 |
| 23 H | -2.5096160 | -2.3378730 | -1.1979190 |
| 24 H | -4.8400630 | -2.0648580 | -0.4225030 |
| 25 H | -4.0351190 | 2.0204300  | 0.6167390  |
| 26 H | -1.6955950 | 1.7467630  | -0.1618930 |
| 27 C | 2.8096310  | -1.3799880 | 3.0443370  |
| 28 C | 2.7403730  | 0.0960390  | 2.6692360  |
| 29 C | 2.5339730  | 0.2964670  | 1.1814940  |
| 30 O | 2.5448970  | 1.7131570  | 0.9488510  |
| 31 P | 2.0809390  | 2.1460820  | -0.5534640 |
| 32 O | 0.5741980  | 2.1823620  | -0.6428610 |
| 33 O | 2.6750960  | 3.6560670  | -0.4721480 |
| 34 C | 2.4411010  | 4.4650830  | -1.6215130 |
| 35 O | 2.8154020  | 1.3199830  | -1.5743210 |
| 36 O | 3.9474640  | 0.7246850  | 3.0709890  |
| 37 H | 1.8862030  | 0.5453510  | 3.2032730  |
| 38 H | 1.5889520  | -0.1512290 | 0.8496100  |
| 39 H | 3.3476590  | -0.1734000 | 0.6224340  |
| 40 H | 1.3679850  | 4.6120340  | -1.7790690 |
| 41 H | 2.8788820  | 4.0042130  | -2.5130560 |
| 42 H | 2.9176370  | 5.4291740  | -1.4414310 |
| 43 H | 1.8035440  | -1.8090160 | 2.9221480  |
| 44 H | 3.0683890  | -1.4387550 | 4.1091530  |
| 45 O | 3.7652780  | -2.1058540 | 2.3134730  |
| 46 H | 3.3026960  | -2.3792090 | 1.4736440  |
| 47 H | 3.9397810  | 1.6024270  | 2.6563700  |

Table S50 - Cartesian coordinates (given in Angstroms) generated for structure **AC** (Figure S222), calculated at M06-2X/6-31G level, after energy minimisation calculations.

| Atom | X          | Y          | Z          |
|------|------------|------------|------------|
| 1 O  | 4.2523900  | -3.6949370 | -0.0126030 |
| 2 C  | 3.4702420  | -2.7526330 | -0.2129030 |
| 3 C  | 1.9796270  | -3.1084840 | -0.3576820 |
| 4 N  | 1.1402110  | -1.9422790 | -0.2105110 |
| 5 C  | -0.2060880 | -2.0789530 | -0.1758840 |
| 6 N  | -0.8745950 | -0.8719540 | -0.0053340 |
| 7 C  | -2.2482830 | -0.6807000 | 0.0379450  |
| 8 C  | -3.1953650 | -1.6264520 | -0.3919780 |
| 9 C  | -4.5495540 | -1.3222880 | -0.3363970 |
| 10 C | -4.9868770 | -0.0865080 | 0.1341860  |
| 11 C | -6.4469950 | 0.2023440  | 0.2455110  |
| 12 F | -7.1688670 | -0.4624180 | -0.6735260 |
| 13 F | -6.9523840 | -0.1493890 | 1.4458400  |
| 14 F | -6.7180860 | 1.5112540  | 0.0954960  |
| 15 C | -4.0519760 | 0.8592000  | 0.5571210  |
| 16 C | -2.6995180 | 0.5682160  | 0.5099020  |
| 17 O | -0.7783980 | -3.1686770 | -0.2562480 |
| 18 O | 3.7638910  | -1.5243400 | -0.3343260 |
| 19 H | 1.7230620  | -3.8573490 | 0.3973960  |
| 20 H | 1.8368540  | -3.5923350 | -1.3357480 |
| 21 H | 1.5661200  | -1.0280720 | -0.4060250 |
| 22 H | -0.3155000 | -0.0635410 | 0.2979950  |
| 23 H | -2.8620210 | -2.5852180 | -0.7606090 |
| 24 H | -5.2736100 | -2.0568090 | -0.6759390 |
| 25 H | -4.3842900 | 1.8262830  | 0.9218940  |
| 26 H | -1.9606420 | 1.2937190  | 0.8399650  |
| 27 C | 6.1099250  | 0.6474710  | 0.7848210  |
| 28 C | 4.9737600  | 1.4803030  | 0.1904420  |
| 29 C | 3.7569520  | 1.4759400  | 1.1040600  |
| 30 O | 2.7856290  | 2.4190420  | 0.6405360  |
| 31 P | 1.4479850  | 1.8233970  | -0.0620390 |
| 32 O | 0.3967680  | 1.4988200  | 0.9734920  |
| 33 O | 1.0564680  | 3.1982040  | -0.8430200 |
| 34 C | -0.1011730 | 3.1013210  | -1.6673360 |
| 35 O | 1.7855910  | 0.7354570  | -1.0462950 |
| 36 O | 4.6357910  | 1.0489250  | -1.1137860 |
| 37 H | 5.3314350  | 2.5159670  | 0.0980410  |
| 38 H | 4.0427850  | 1.7677640  | 2.1195270  |
| 39 H | 3.3413480  | 0.4617230  | 1.1367300  |
| 40 H | -0.9747890 | 2.7997390  | -1.0783420 |
| 41 H | 0.0588190  | 2.3743590  | -2.4699590 |
| 42 H | -0.2774220 | 4.0877630  | -2.0976780 |
| 43 H | 6.5326320  | 1.1789970  | 1.6475360  |
| 44 H | 6.9006820  | 0.5815010  | 0.0197290  |
| 45 O | 5.7080590  | -0.6251600 | 1.2338180  |
| 46 H | 5.1069440  | -1.0254870 | 0.5509160  |
| 47 H | 3.9049830  | 0.4033180  | -1.0376200 |

3D visualisations – HF/3-21G level

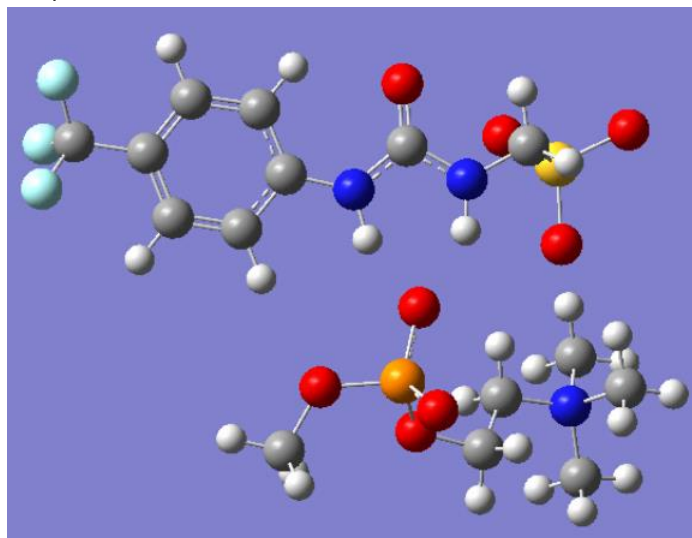

Figure S224 - Output file generated for conformation **A** (Figure S217) calculated at HF/3-21G level.

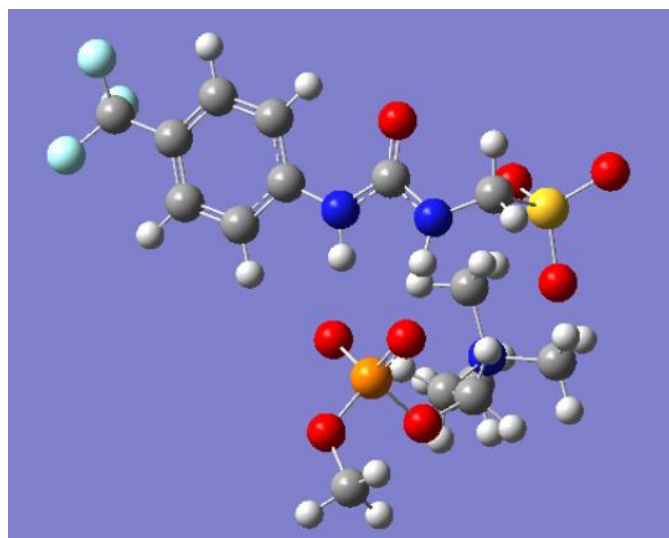

Figure S225 - Output file generated for conformation **B** (Figure S217) calculated at HF/3-21G level.

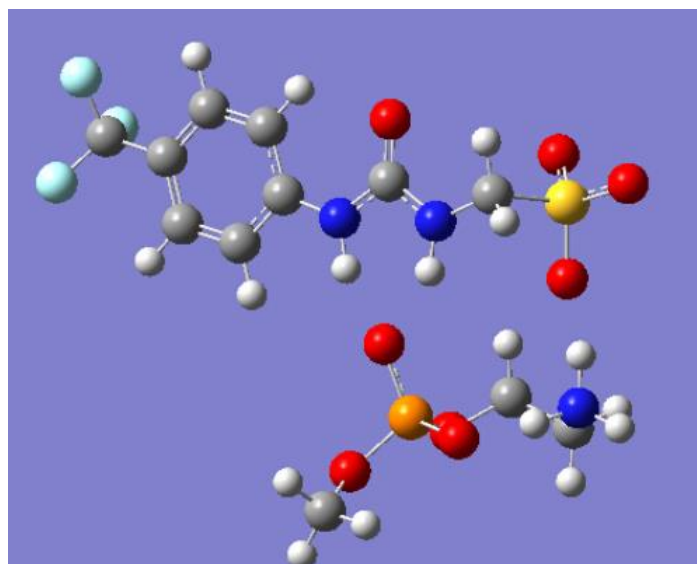

Figure S226 - Output file generated for conformation **C** (Figure S218) calculated at HF/3-21G level.

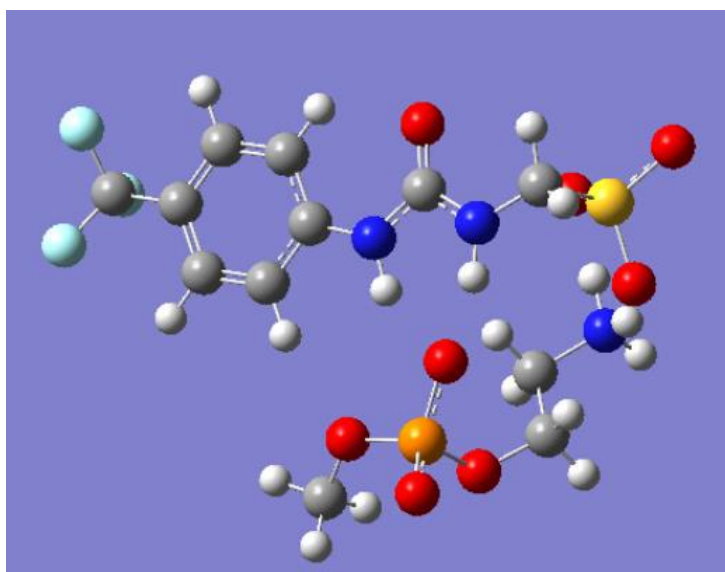

Figure S227 - Output file generated for conformation **D** (Figure S211) calculated at HF/3-21G level.

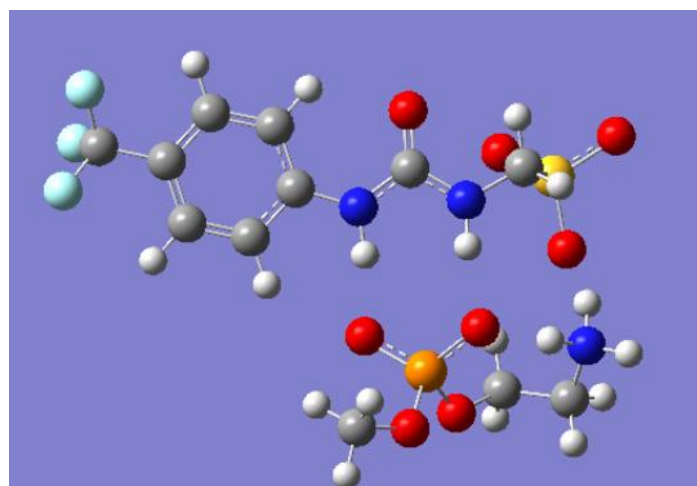

Figure S228 - Output file generated for conformation **E** (Figure S218) calculated at HF/3-21G level.

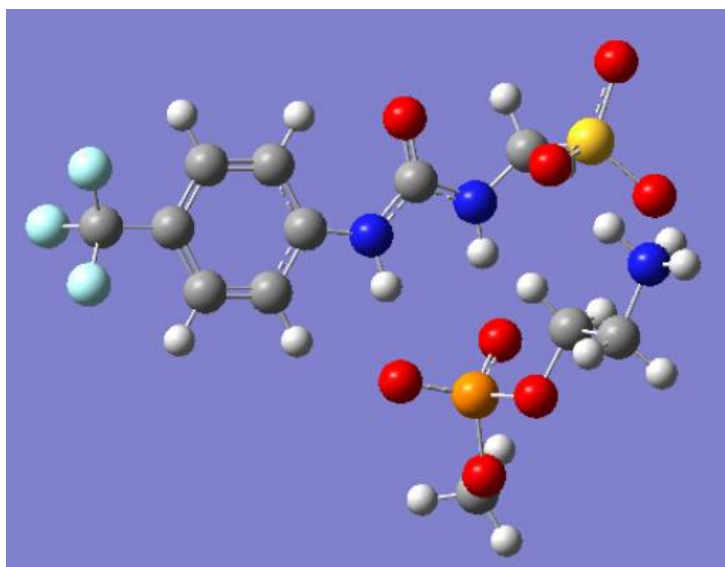

Figure S229 - Output file generated for conformation **F** (Figure S218) calculated at HF/3-21G level.

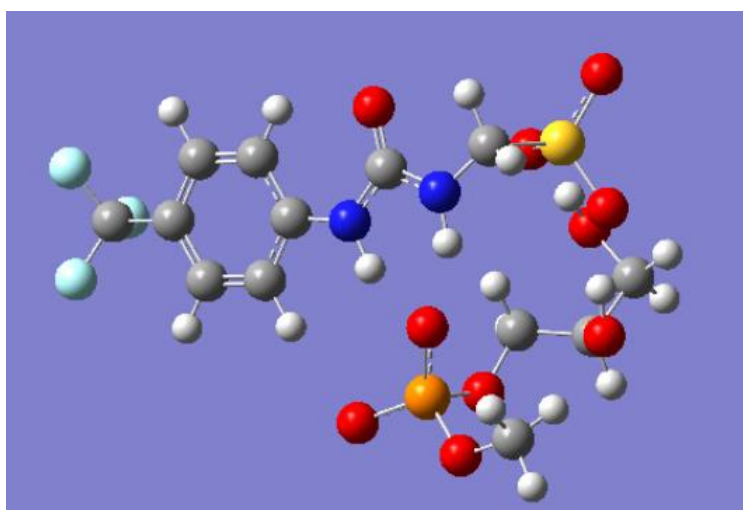

Figure S230 - Output file generated for conformation **G** (Figure S219) calculated at HF/3-21G level.

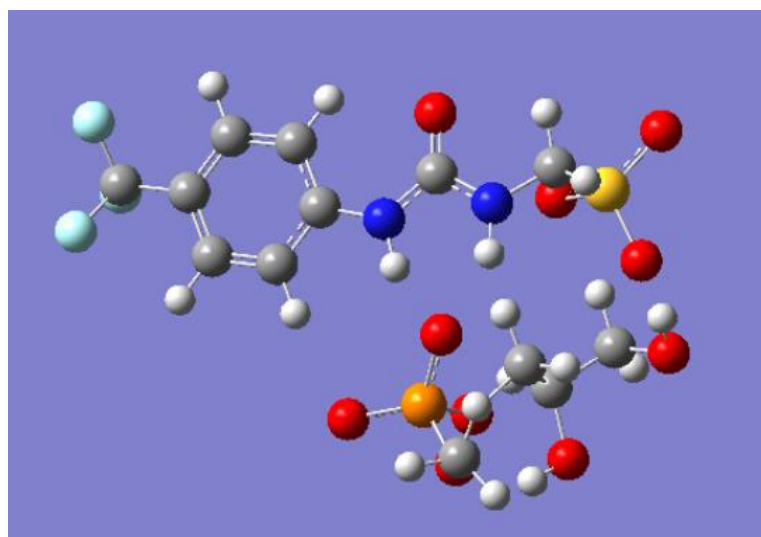

Figure S231 - Output file generated for conformation **H** (Figure S219) calculated at HF/3-21G level.

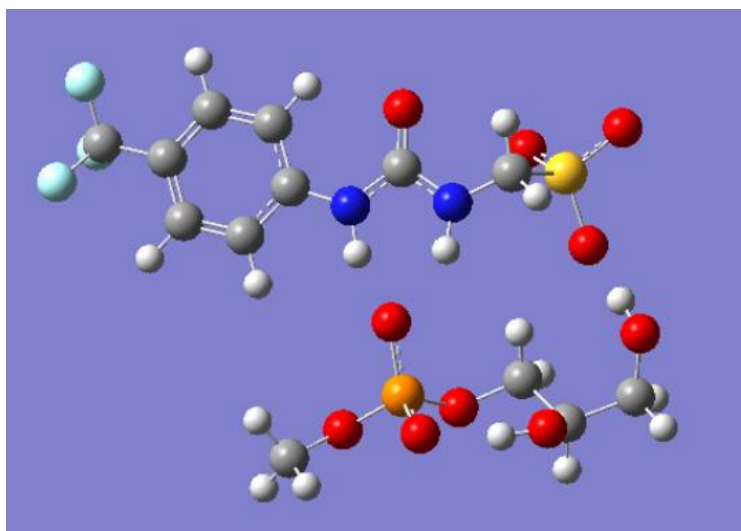

Figure S232 - Output file generated for conformation I (Figure S219) calculated at HF/3-21G level.

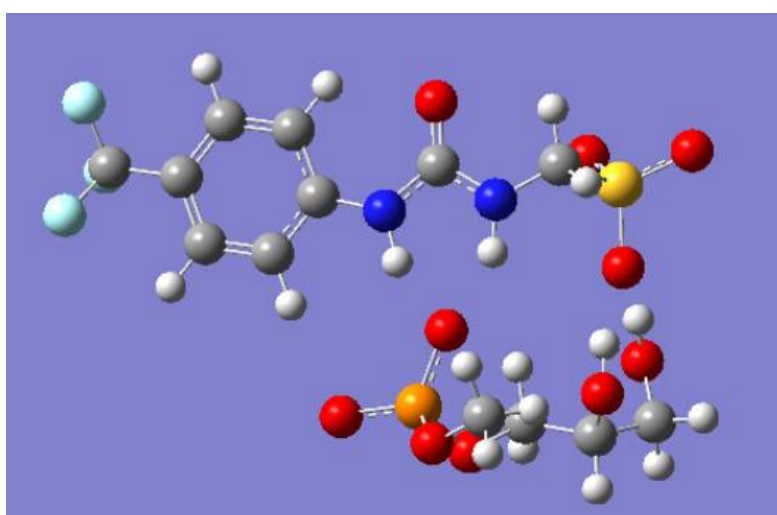

Figure S233 - Output file generated for conformation J (Figure S219) calculated at HF/3-21G level.

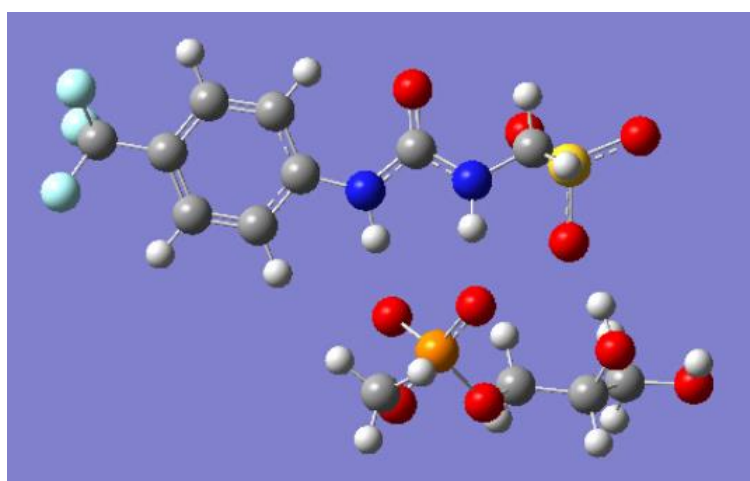

Figure S234 - Output file generated for conformation K (Figure S219) calculated at HF/3-21G level.

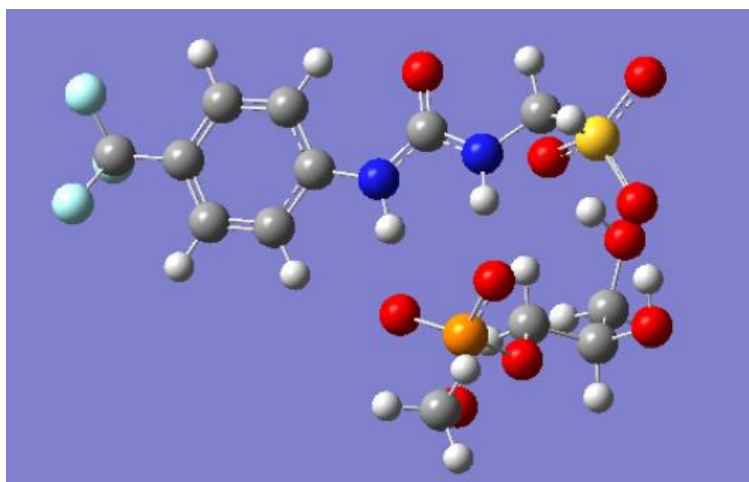

Figure S235 - Output file generated for conformation **L** (Figure S219) calculated at HF/3-21G level.

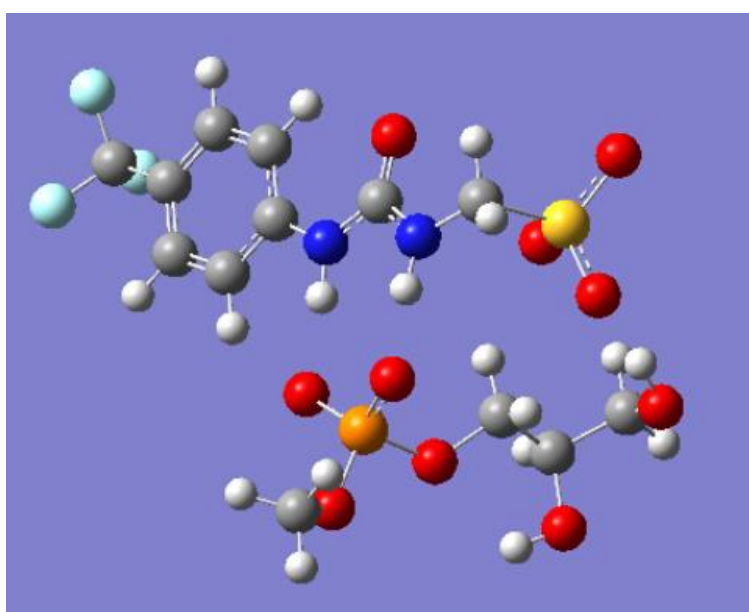

Figure S236 - Output file generated for conformation **M** (Figure S219) calculated at HF/3-21G level.



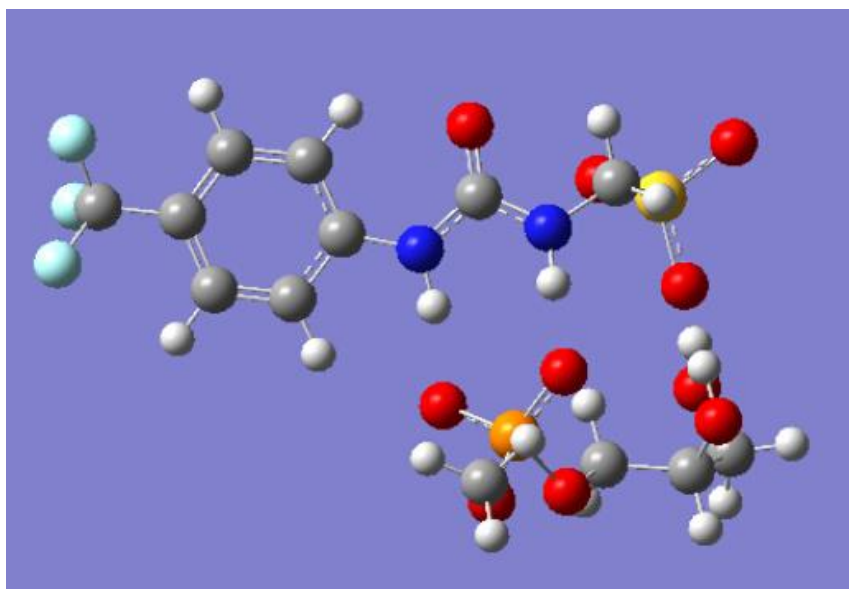

Figure S237 - Output file generated for conformation **N** (Figure S219) calculated at HF/3-21G level.

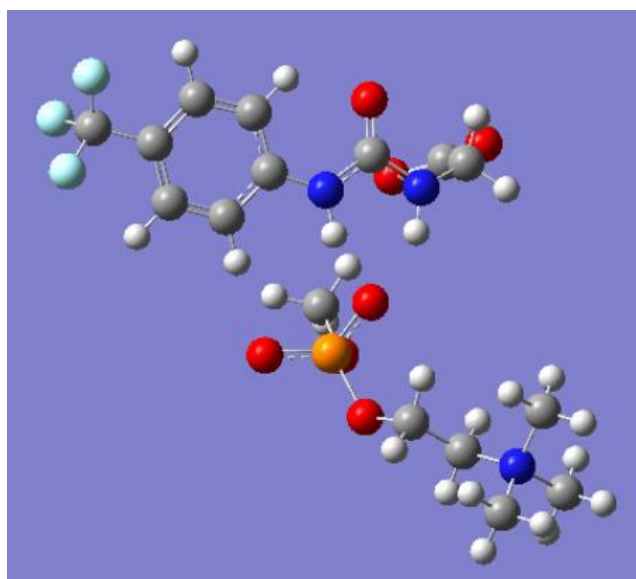

Figure S238 - Output file generated for conformation **O** (Figure S219) calculated at HF/3-21G level.

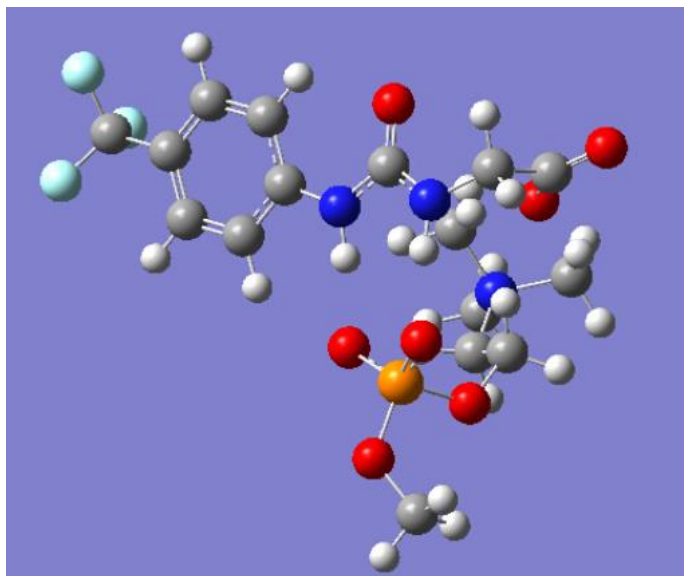

Figure S239 - Output file generated for conformation **P** (Figure S218) calculated at HF/3-21G level.

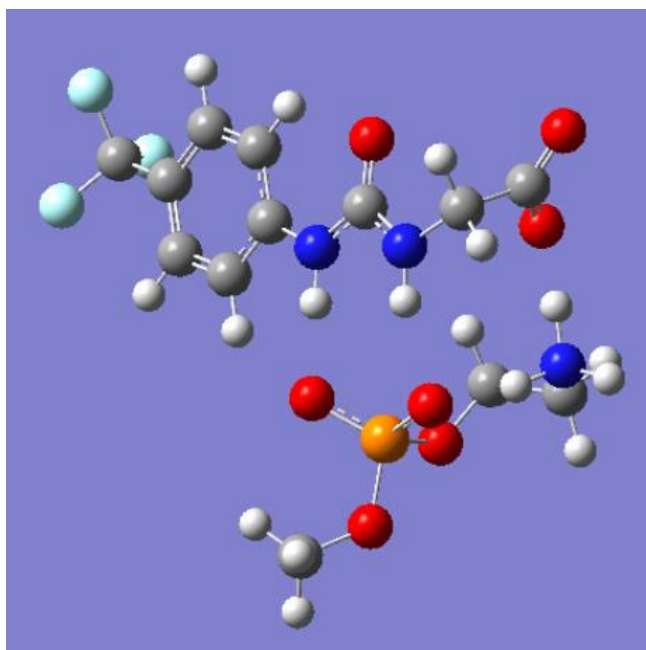

Figure S240 - Output file generated for conformation **Q** (Figure S221) calculated at HF/3-21G level.

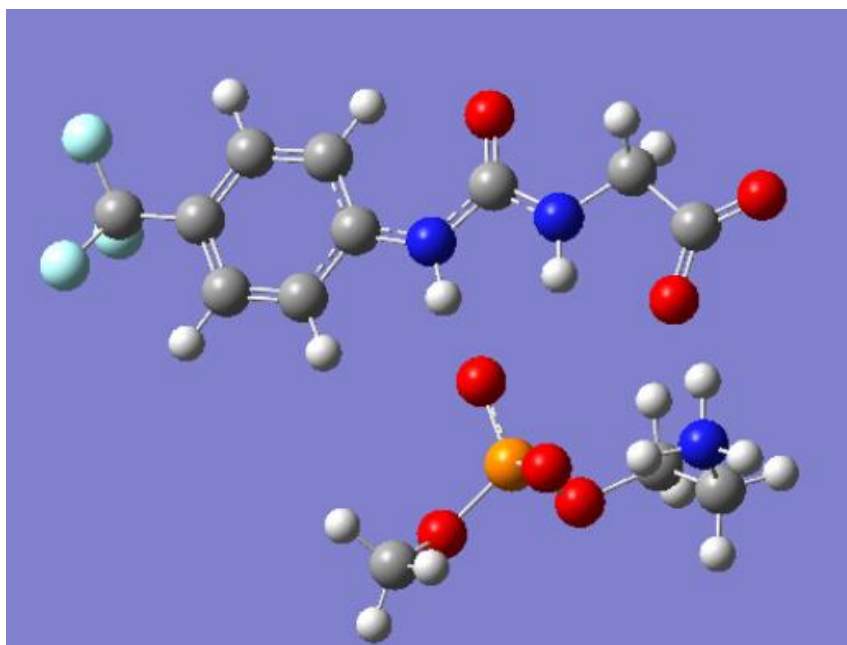

Figure S241 - Output file generated for conformation **R** (Figure S221) calculated at HF/3-21G level.

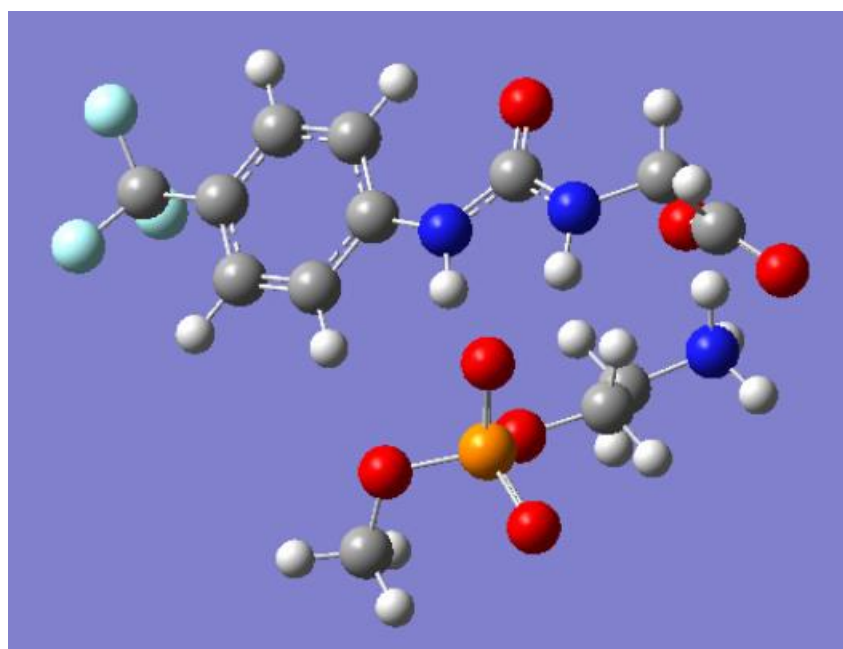

Figure S242 - Output file generated for conformation **S** (Figure S221) calculated at HF/3-21G level.

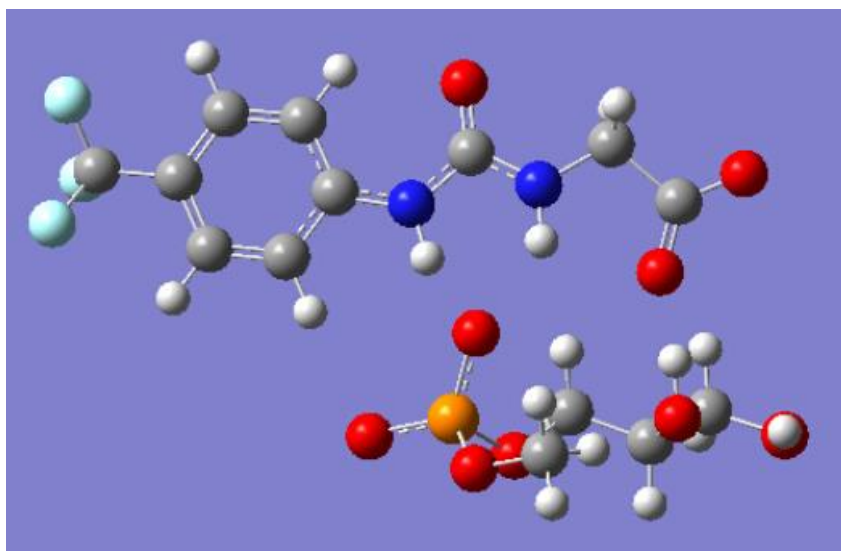

Figure S243 - Output file generated for conformation **T** (Figure S222) calculated at HF/3-21G level.

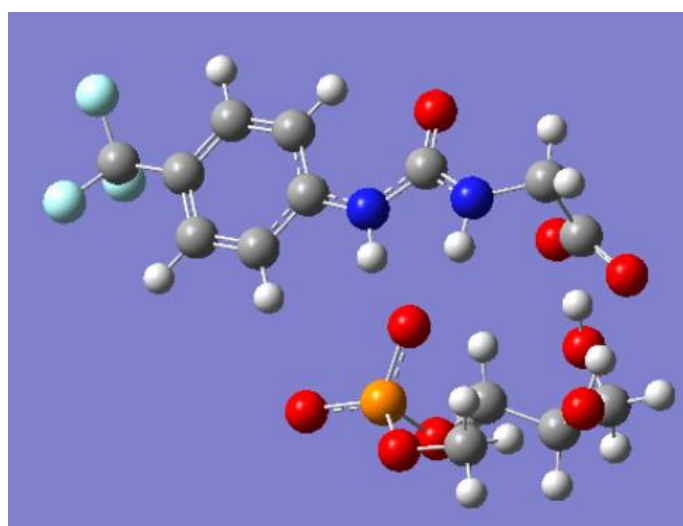

Figure S244 - Output file generated for conformation **U** (Figure S222) calculated at HF/3-21G level.

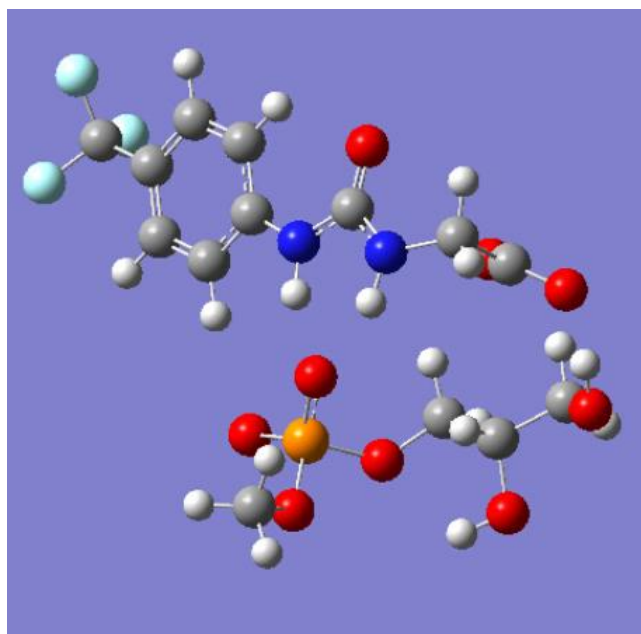

Figure S245 - Output file generated for conformation **V** (Figure S222) calculated at HF/3-21G level.

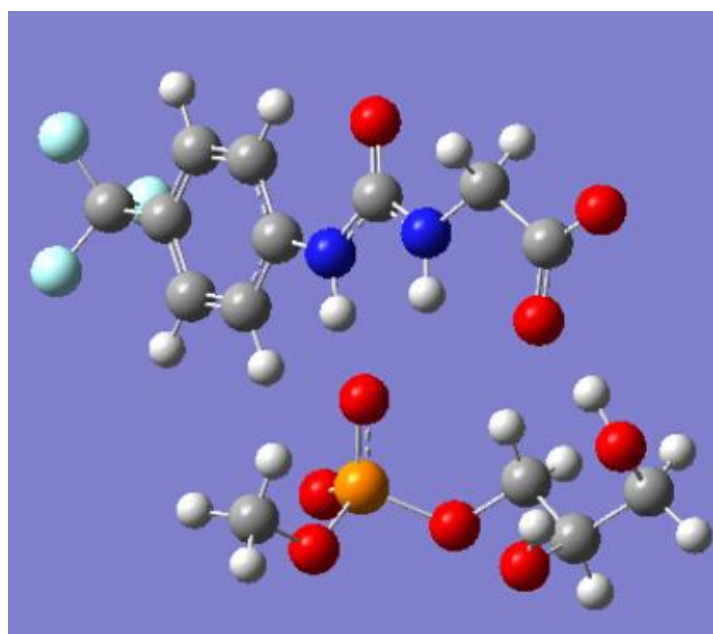

Figure S246 - Output file generated for conformation **W** (Figure S222) calculated at HF/3-21G level.

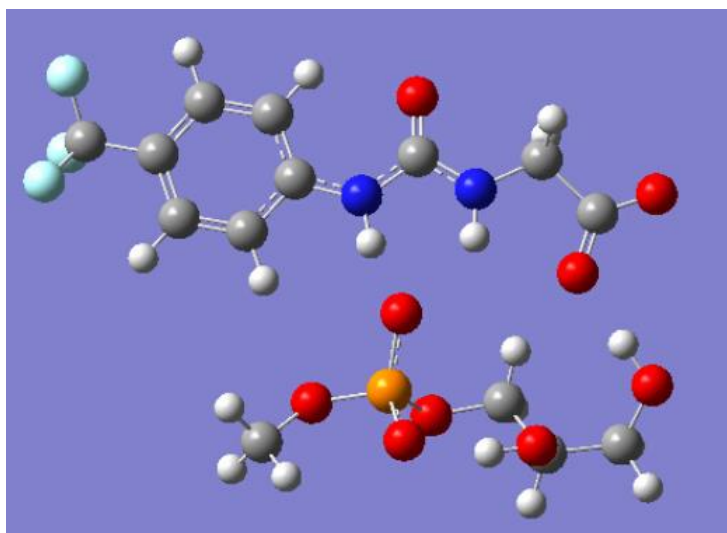

Figure S247 - Output file generated for conformation X (Figure S222) calculated at HF/3-21G level.

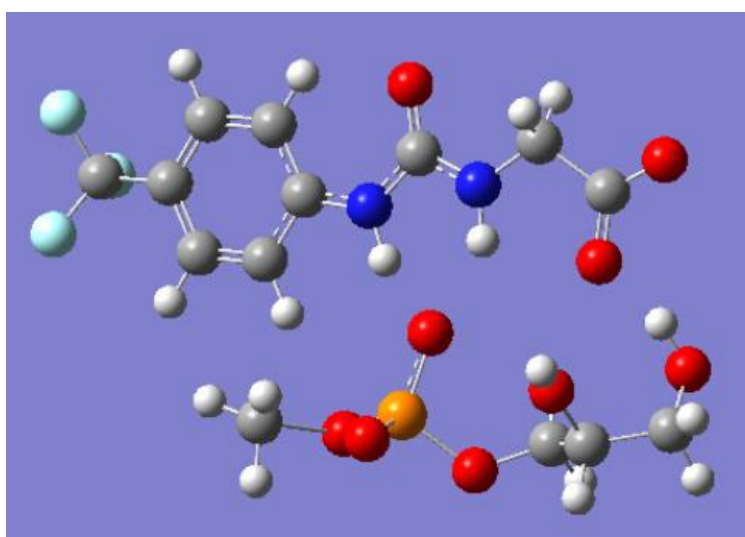

Figure S248 - Output file generated for conformation Y (Figure S222) calculated at HF/3-21G level.

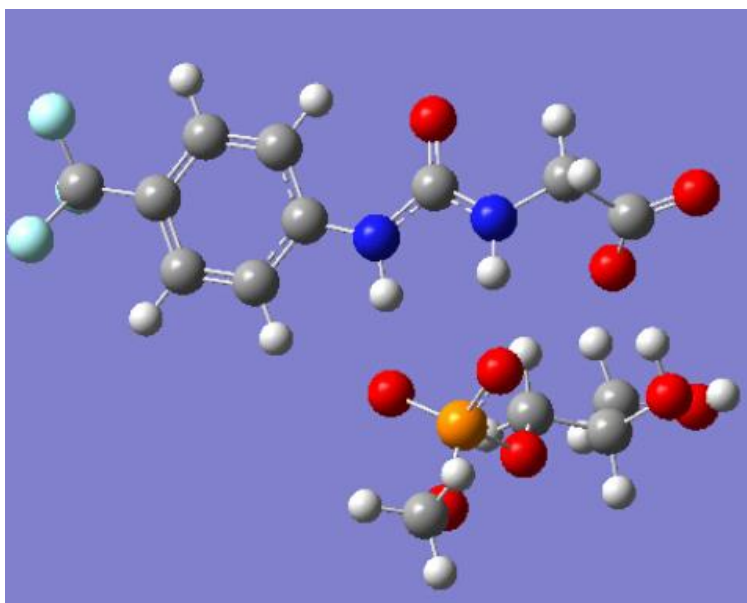

Figure S249 - Output file generated for conformation **Z** (Figure S222) calculated at HF/3-21G level.

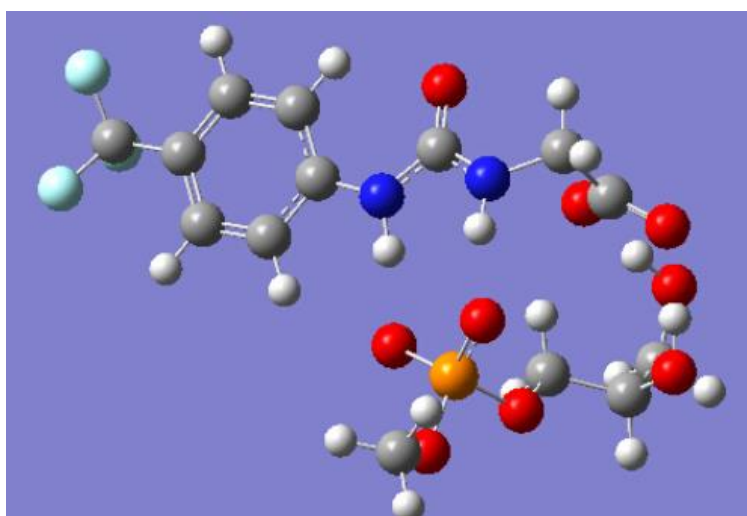

Figure S250 - Output file generated for conformation **AA** (Figure S222) calculated at HF/3-21G level.

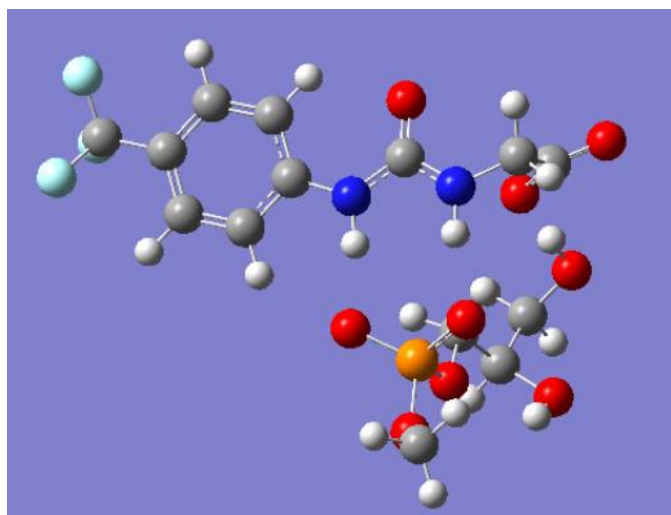

Figure S251 - Output file generated for conformation **AB** (Figure S222) calculated at HF/3-21G level.

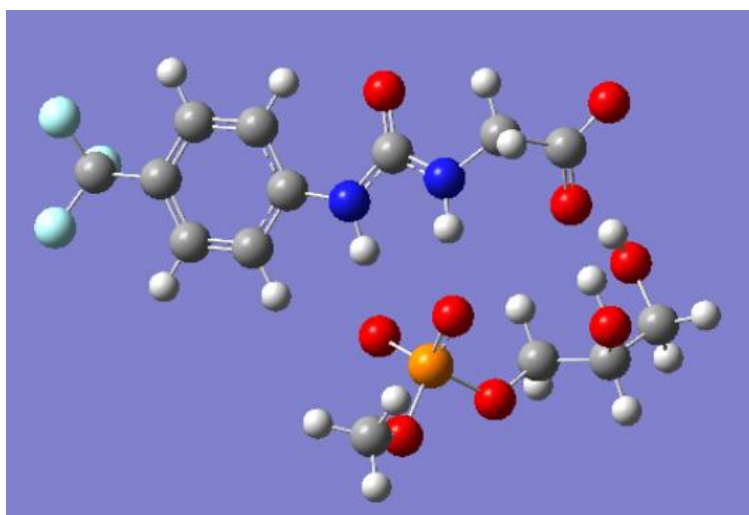

Figure S252 - Output file generated for conformation **AC** (Figure S222) calculated at HF/3-21G level.



3D visualisations – M06-2X/6-31G level

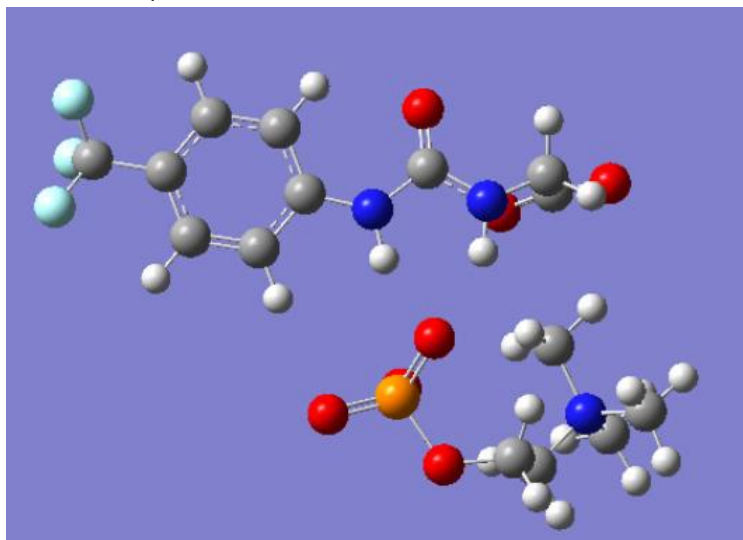

Figure S253 - Output file generated for conformation **O** (Figure S220) calculated at M06-2X/6-31G level.

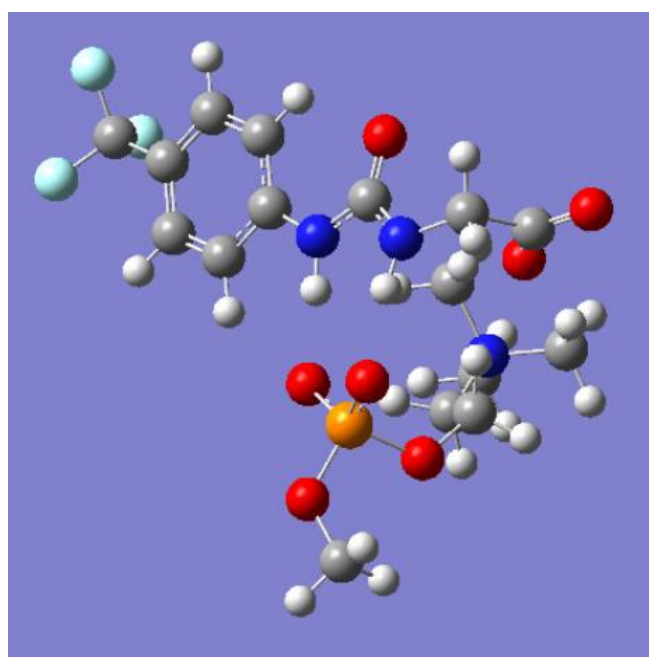

Figure S254 - Output file generated for conformation **P** (Figure S220) calculated at M06-2X/6-31G level.

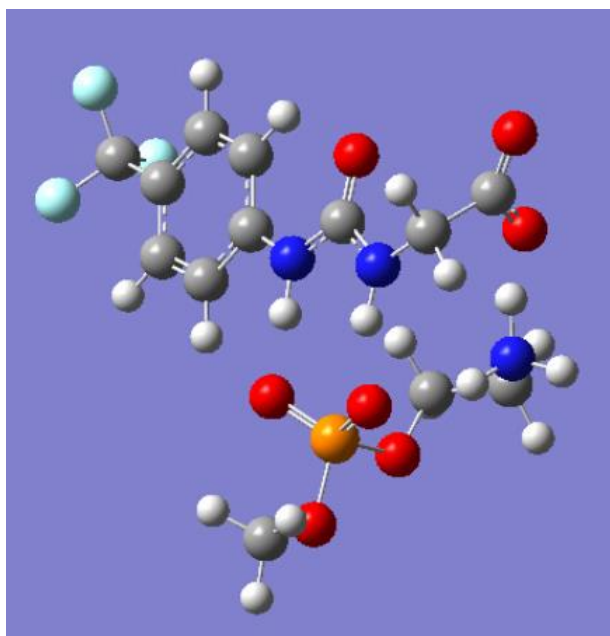

Figure S255 - Output file generated for conformation **Q** (Figure S221) calculated at M06-2X/6-31G level.

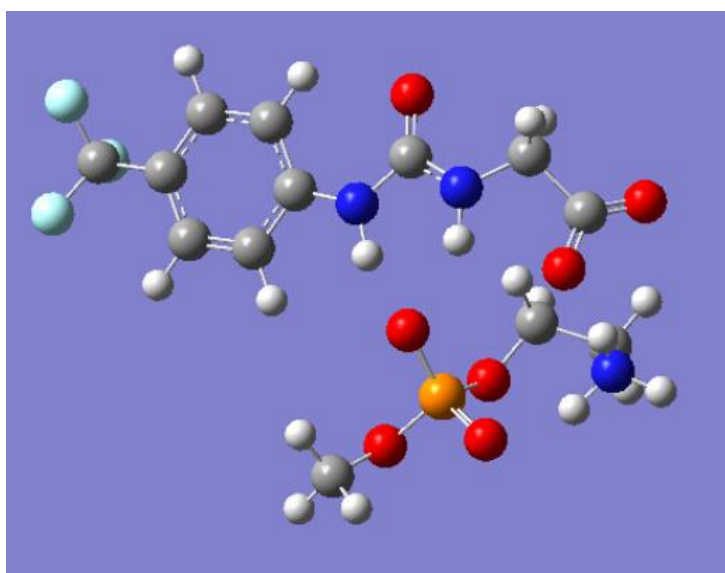

Figure S256 - Output file generated for conformation **R** (Figure S221) calculated at M06-2X/6-31G level.

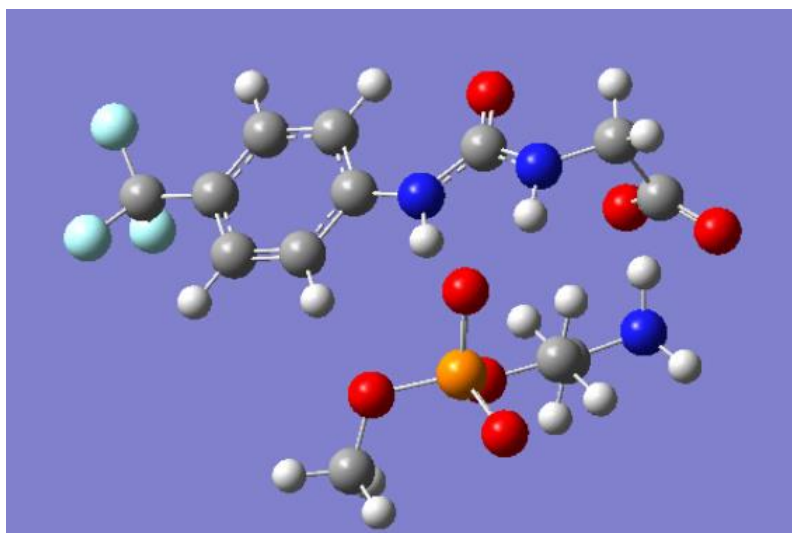

Figure S257 - Output file generated for conformation **S** (Figure S221) calculated at M06-2X/6-31G level.

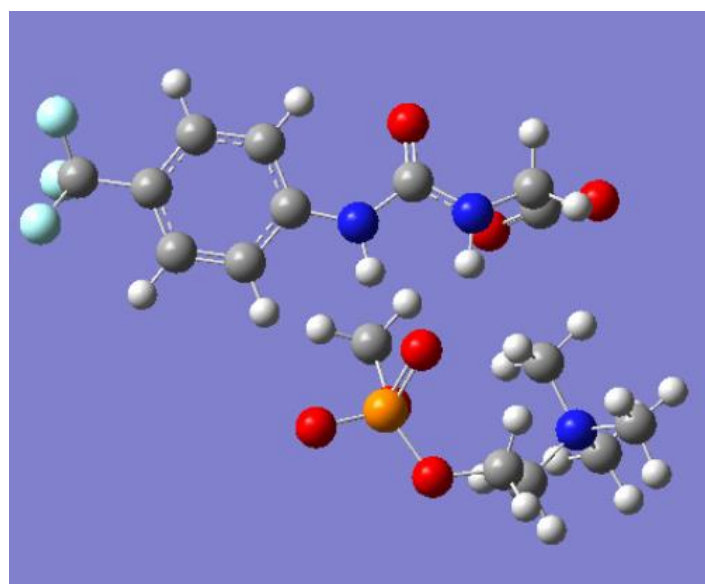

Figure S258 - Output file generated for conformation **T** (Figure S222) calculated at M06-2X/6-31G level.

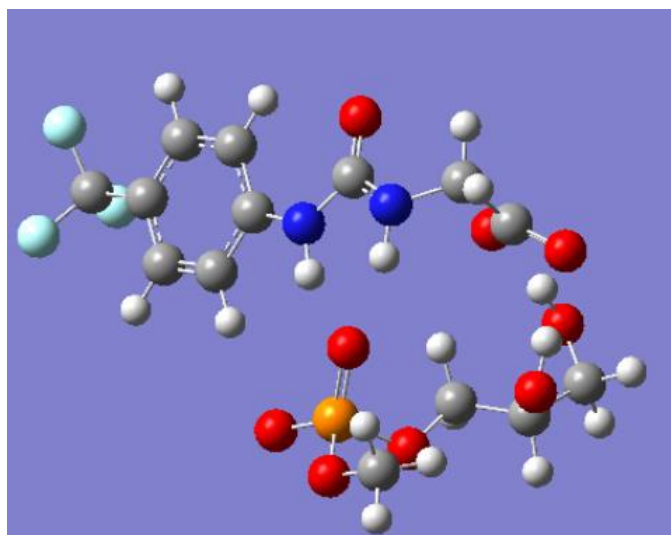

Figure S259 - Output file generated for conformation **U** (Figure S222) calculated at M06-2X/6-31G level.

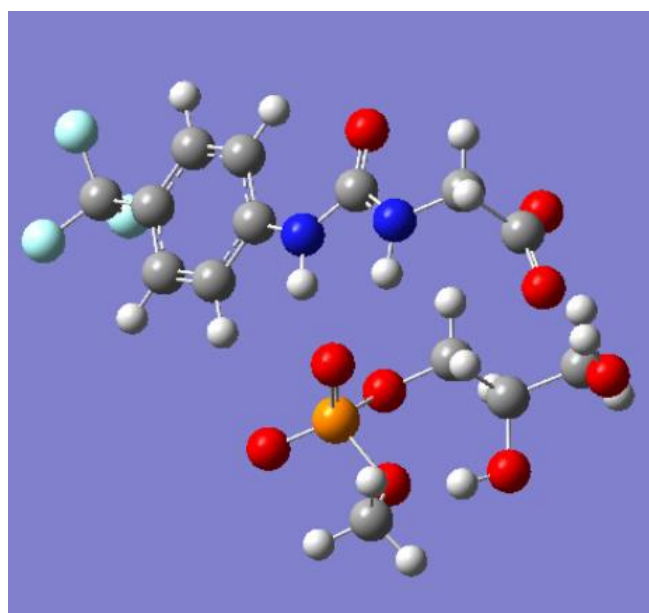

Figure S260 - Output file generated for conformation **V** (Figure S222) calculated at M06-2X/6-31G level.

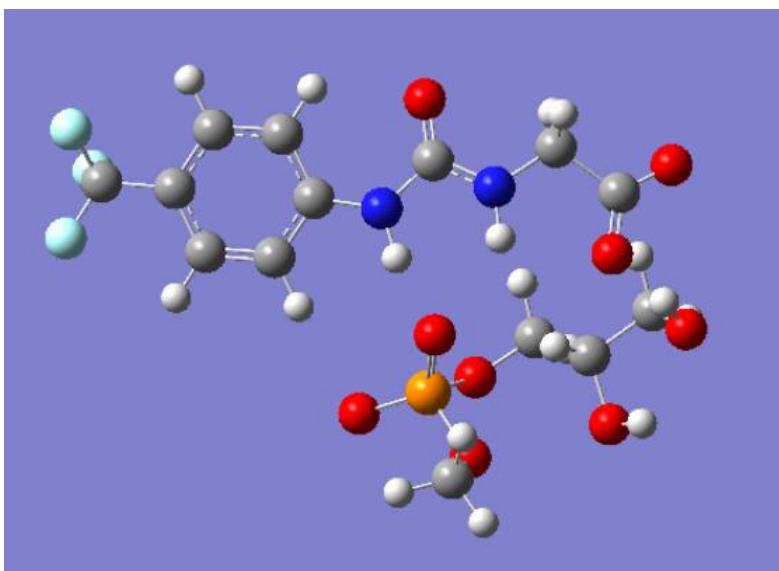

Figure S261 - Output file generated for conformation **W** (Figure S222) calculated at M06-2X/6-31G level.

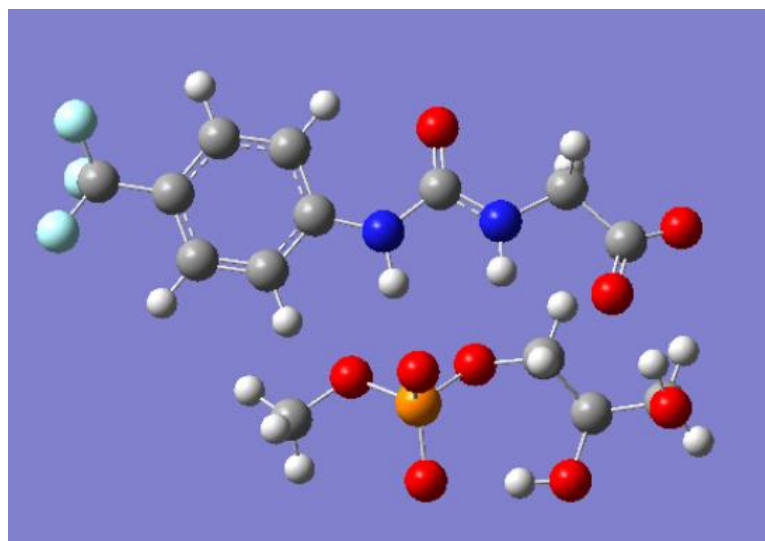

Figure S262 - Output file generated for conformation **X** (Figure S222) calculated at M06-2X/6-31G level.

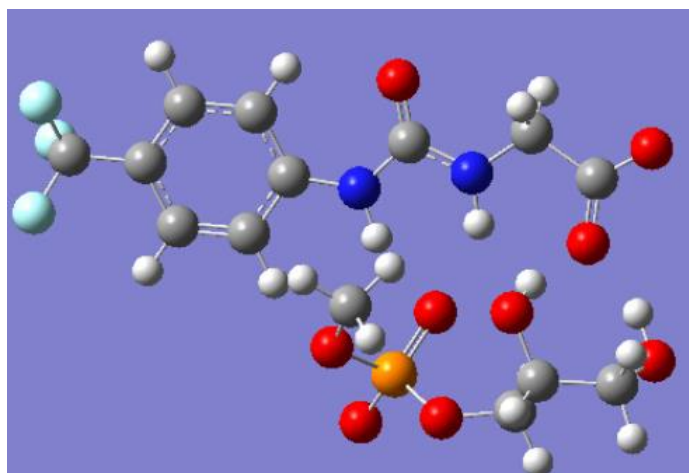

Figure S263 - Output file generated for conformation **Y** (Figure S222) calculated at M06-2X/6-31G level.

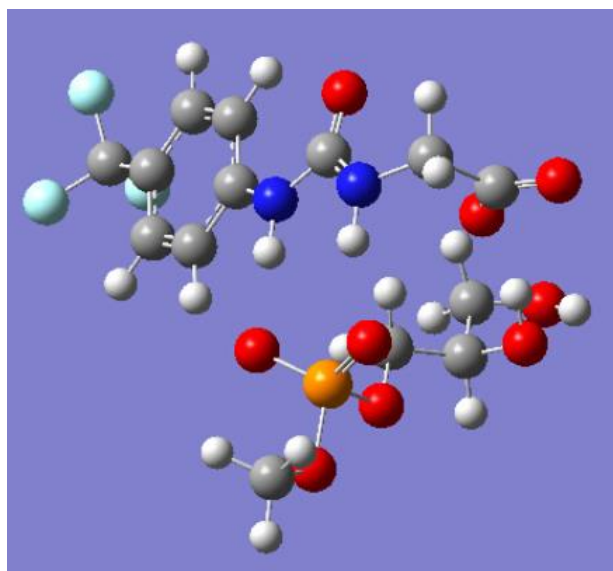

Figure S264 - Output file generated for conformation **Z** (Figure S222) calculated at M06-2X/6-31G level.

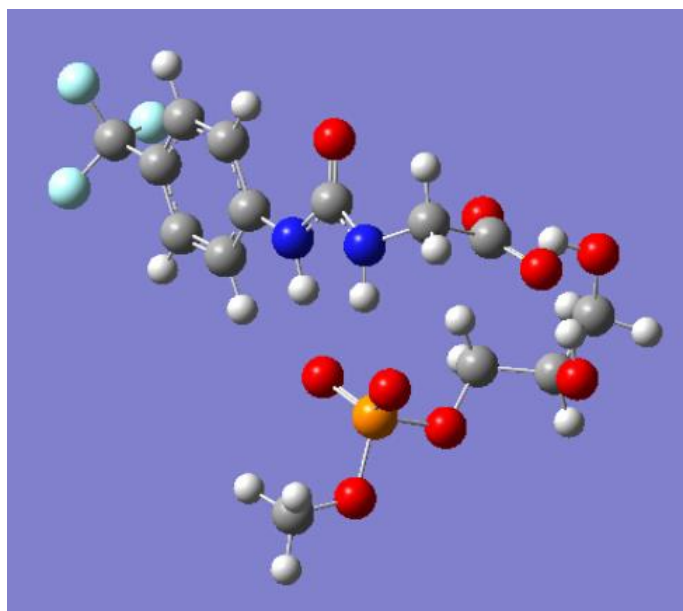

Figure S265 - Output file generated for conformation **AA** (Figure S222) calculated at M06-2X/6-31G level.

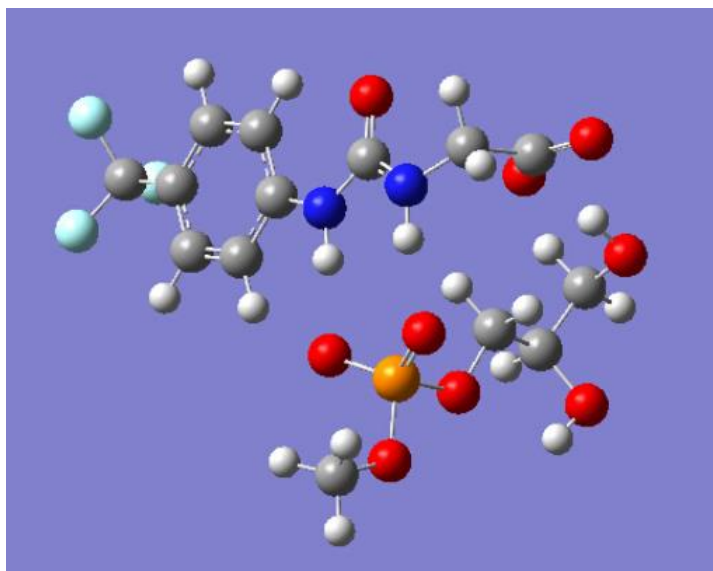

Figure S266 - Output file generated for conformation **AB** (Figure S222) calculated at M06-2X/6-31G level.

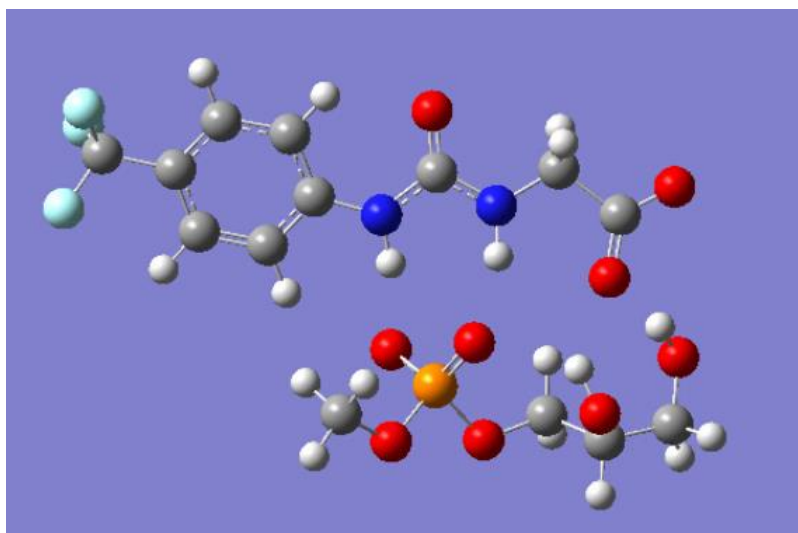

Figure S267 - Output file generated for conformation **AC** (Figure S222) calculated at M06-2X/6-31G level.



## Section 16: References

- 1 Joos, J. P. Clare and A. P. Davis, *Angew. Chem.*, 2003, **42**, 4931–4933.
- 2 G. Townshend, G. S. Thompson, L. J. White, J. R. Hiscock and J. L. Ortega-Roldan, *Chem. Commun.*, 2020, **56**, 4015–4018.
- 3 H. Y. Carr and E. M. Purcell, *Phys. Rev.*, 1954, **94**, 630–638.
- 4 S. Meiboom and D. Gill, *Rev. Sci. Instrum.*, 1958, **29**, 688–691.
- 5 *OriginPro*, OriginLab Corporation, Northhampton, MA, USA.
- 6 J. R. Hiscock, G. P. Bustone, B. Wilson, K. E. Belsey and L. R. Blackholly, *Soft Matter*, 2016, **12**, 4221–4228.
- 7 L. J. White, S. N. Tyuleva, B. Wilson, H. J. Shepherd, K. K. L. Ng, S. J. Holder, E. R. Clark and J. R. Hiscock, *Chem-Eur. J.*, 2018, **24**, 7761–7773.
- 8 L. R. Blackholly, H. J. Shepherd and J. R. Hiscock, *CrystEngComm*, 2016, **18**, 7021–7028.
- 9 L. J. White, N. J. Wells, L. R. Blackholly, H. J. Shepherd, B. Wilson, G. P. Bustone, T. J. Runacres and J. R. Hiscock, *Chem. Sci.*, 2017, **8**, 7620–7630.
- 10 A. Rutkauskaite, L. J. White, K. L. F. Hilton, G. Picci, L. Croucher, C. Caltagirone and J. R. Hiscock, *Org. Biomol. Chem.*, 2020.
- 11 N. Allen, L. J. White, J. E. Boles, Dr. G. T. Williams, Dr. D. F. Chu, R. J. Ellaby, Dr. H. J. Shepherd, K. K. L. Ng, L. R. Blackholly, B. Wilson, Prof. D. P. Mulvihill and Dr. J. R. Hiscock, *Chemmedchem*, 2020, **15**, 2193–2193.
- 12 M. Walker, A. J. A. Harvey, A. Sen and C. E. H. Dessent, *J. Phys. Chem. A*, 2013, **117**, 12590–12600.
